# Supplementary material for: Accelerated viral dynamics in bat cell lines, with implications for zoonotic emergence
Source: eLife journal article supplement (doi:10.7554/elife.48401), 2020-02-03

□ persistent infection    □ virus-induced epidemic extinction    ■ immune-mediated epidemic extinction

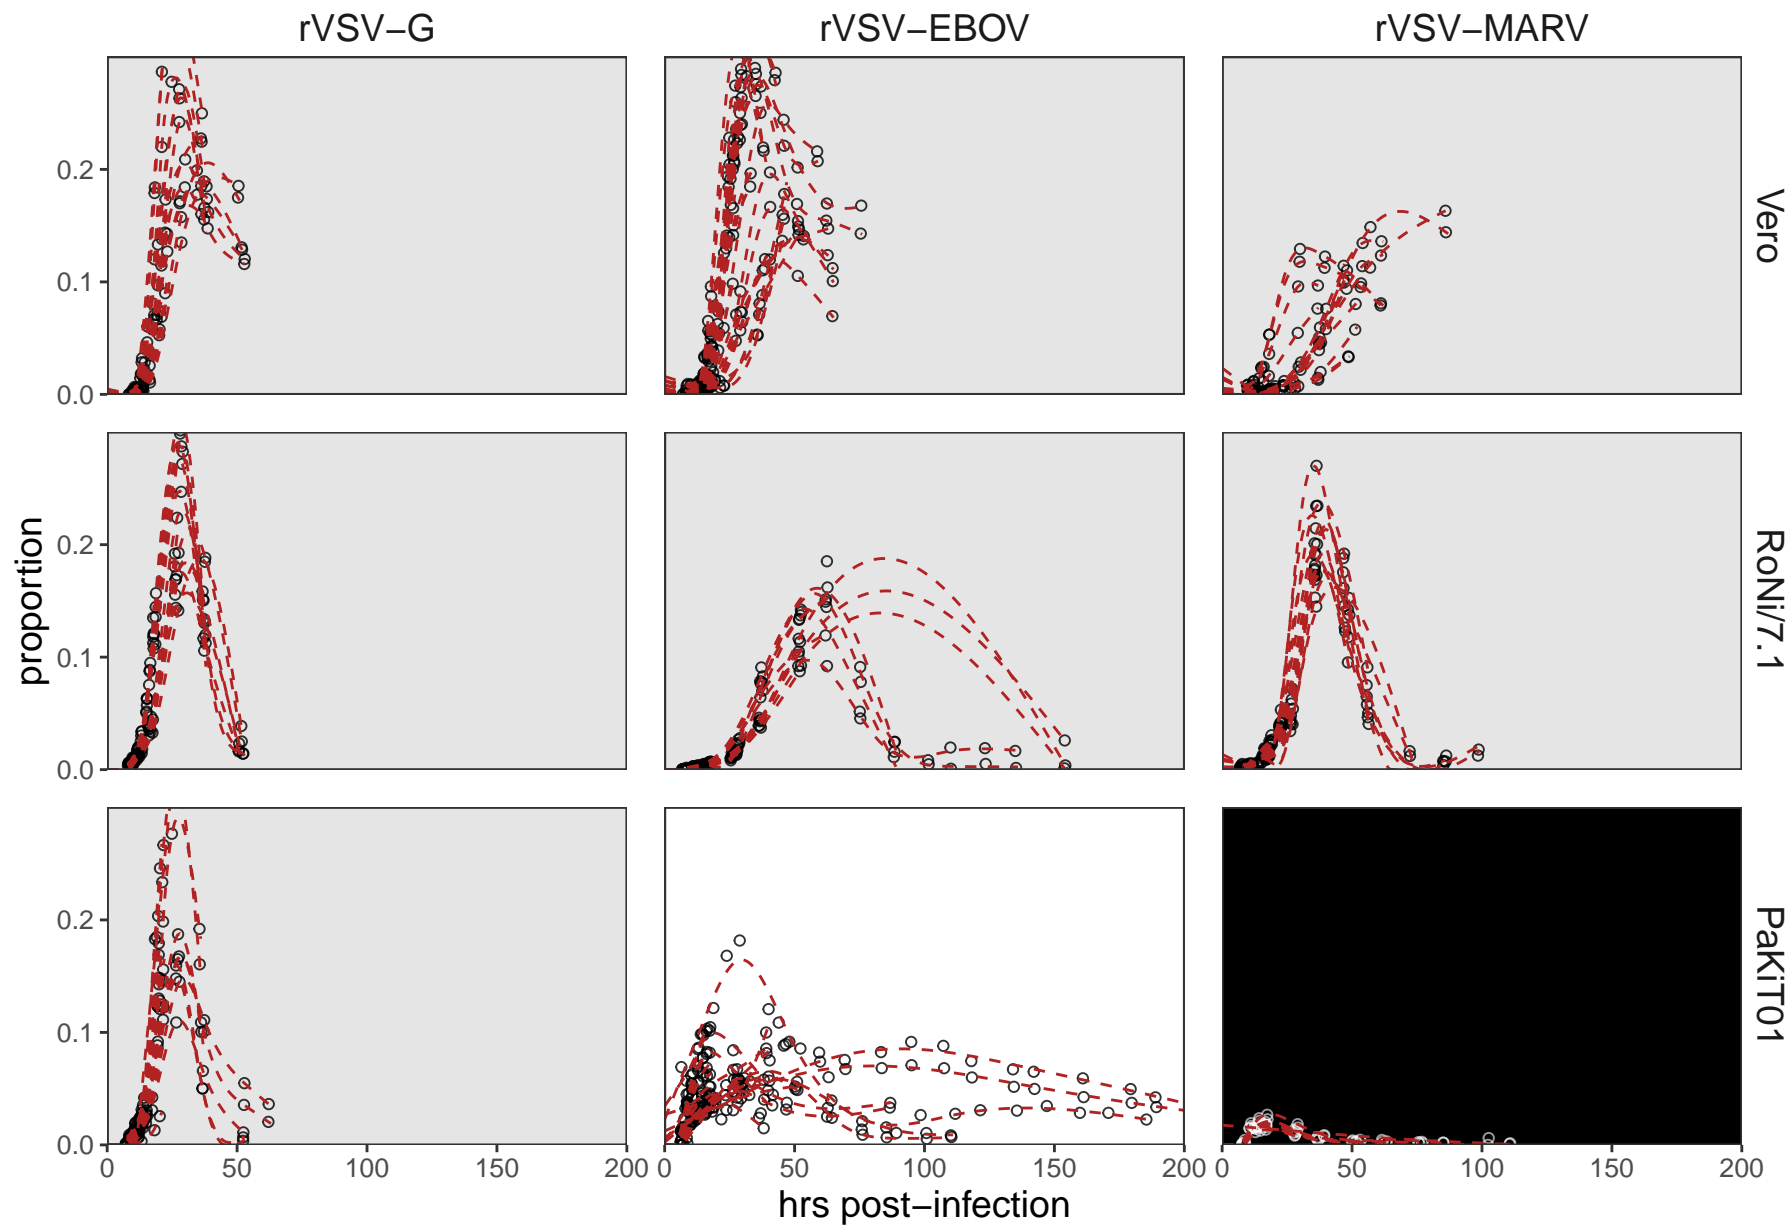

Supplement: supp [file elife-48401-supp-v1.zip]
