# Supplementary material for: Accelerated viral dynamics in bat cell lines, with implications for zoonotic emergence
Source: eLife journal article supplement (doi:10.7554/elife.48401), 2020-02-03
Supplement: supp [file elife-48401-supp-v1.zip]

Archive with 22 entries (22 files):
- elife_poa_e48401_Supplementary_file_2.docx
- elife_poa_e48401_Supplementary_file_7.docx
- elife_poa_e48401_Transparent_Reporting_File.pdf
- elife_poa_e48401_Video_1.mov
- elife_poa_e48401_Figure_1_figure_supplement_4.pdf
- elife_poa_e48401_Figure_1_figure_supplement_6.pdf
- elife_poa_e48401_Figure_4_figure_supplement_1.pdf
- elife_poa_e48401_Figure_1_figure_supplement_2.pdf
- elife_poa_e48401_Supplementary_file_3.docx
- elife_poa_e48401_Figure_5_figure_supplement_2.pdf
- elife_poa_e48401_Figure_1_figure_supplement_3.pdf
- elife_poa_e48401_Supplementary_file_5.docx
- elife_poa_e48401_Figure_1_figure_supplement_1.pdf
- elife_poa_e48401_Video_2.mov
- elife_poa_e48401_Figure_5_figure_supplement_1.pdf
- elife_poa_e48401_Figure_1_figure_supplement_7.pdf
- elife_poa_e48401_Figure_5_figure_supplement_3.pdf
- elife_poa_e48401_Supplementary_file_4.docx
- elife_poa_e48401_Supplementary_file_6.docx
- elife_poa_e48401_Video_3.mov
- elife_poa_e48401_Supplementary_file_1.xlsx
- elife_poa_e48401_Figure_1_figure_supplement_5.pdf
