# Supplementary material for: Accelerated viral dynamics in bat cell lines, with implications for zoonotic emergence
Source: eLife journal article supplement (doi:10.7554/elife.48401), 2020-02-03
Supplement: supp [file elife-48401-supp-v1.zip › elife_poa_e48401_Supplementary_file_1.xlsx]

## Sheet: A-Infectious-Raw
PhotoID	Plate.ID	well_number	timestep	cell_type	virus	MOI	num_photo_subfields	date_time_initial_infection	date_time_observation	num_infected	time_elapsed	ID	prop_infected
Pak1_A1_TS5	Pak1	A1	5	PaKiT01	EBOV	0.0001	64	2016-07-20 18:30:00	2016-07-22 17:30:00	6064	47	Pak1_A1	0.0657465
Pak1_B1_TS5	Pak1	B1	5	PaKiT01	EBOV	0.0001	64	2016-07-20 18:30:00	2016-07-22 17:30:00	5025	47	Pak1_B1	0.0544816
Pak1_A1_TS6	Pak1	A1	6	PaKiT01	EBOV	0.0001	64	2016-07-20 18:30:00	2016-07-23 07:50:00	7450	61.3333	Pak1_A1	0.0807737
Pak1_B1_TS6	Pak1	B1	6	PaKiT01	EBOV	0.0001	64	2016-07-20 18:30:00	2016-07-23 07:50:00	7403	61.3333	Pak1_B1	0.0802641
Pak1_A1_TS7	Pak1	A1	7	PaKiT01	EBOV	0.0001	64	2016-07-20 18:30:00	2016-07-23 12:20:00	9153	65.8333	Pak1_A1	0.0992378
Pak1_B1_TS7	Pak1	B1	7	PaKiT01	EBOV	0.0001	64	2016-07-20 18:30:00	2016-07-23 12:20:00	8999	65.8333	Pak1_B1	0.0975681
Pak1_A1_TS8	Pak1	A1	8	PaKiT01	EBOV	0.0001	64	2016-07-20 18:30:00	2016-07-23 17:20:00	11394	70.8333	Pak1_A1	0.123535
Pak1_B1_TS8	Pak1	B1	8	PaKiT01	EBOV	0.0001	64	2016-07-20 18:30:00	2016-07-23 17:20:00	11348	70.8333	Pak1_B1	0.123036
Pak1_A1_TS9	Pak1	A1	9	PaKiT01	EBOV	0.0001	64	2016-07-20 18:30:00	2016-07-23 22:20:00	13062	75.8333	Pak1_A1	0.14162
Pak1_B1_TS9	Pak1	B1	9	PaKiT01	EBOV	0.0001	64	2016-07-20 18:30:00	2016-07-23 22:20:00	12596	75.8333	Pak1_B1	0.136567
Pak1_A1_TS10	Pak1	A1	10	PaKiT01	EBOV	0.0001	64	2016-07-20 18:30:00	2016-07-24 09:30:00	12370	87	Pak1_A1	0.134117
Pak1_B1_TS10	Pak1	B1	10	PaKiT01	EBOV	0.0001	64	2016-07-20 18:30:00	2016-07-24 09:30:00	11587	87	Pak1_B1	0.125627
Pak1_A1_TS11	Pak1	A1	11	PaKiT01	EBOV	0.0001	64	2016-07-20 18:30:00	2016-07-24 13:20:00	12122	90.8333	Pak1_A1	0.131428
Pak1_B1_TS11	Pak1	B1	11	PaKiT01	EBOV	0.0001	64	2016-07-20 18:30:00	2016-07-24 13:20:00	11602	90.8333	Pak1_B1	0.12579
Pak1_A1_TS12	Pak1	A1	12	PaKiT01	EBOV	0.0001	64	2016-07-20 18:30:00	2016-07-24 17:30:00	11671	95	Pak1_A1	0.126538
Pak1_B1_TS12	Pak1	B1	12	PaKiT01	EBOV	0.0001	64	2016-07-20 18:30:00	2016-07-24 17:30:00	11190	95	Pak1_B1	0.121323
Pak1_A1_TS13	Pak1	A1	13	PaKiT01	EBOV	0.0001	64	2016-07-20 18:30:00	2016-07-24 21:40:00	11419	99.1667	Pak1_A1	0.123806
Pak1_B1_TS13	Pak1	B1	13	PaKiT01	EBOV	0.0001	64	2016-07-20 18:30:00	2016-07-24 21:40:00	10840	99.1667	Pak1_B1	0.117528
Pak1_A1_TS14	Pak1	A1	14	PaKiT01	EBOV	0.0001	64	2016-07-20 18:30:00	2016-07-25 08:31:00	9144	110.017	Pak1_A1	0.0991402
Pak1_B1_TS14	Pak1	B1	14	PaKiT01	EBOV	0.0001	64	2016-07-20 18:30:00	2016-07-25 08:44:00	8279	110.233	Pak1_B1	0.0897618
Pak10_A1_TS1	Pak10	A1	1	PaKiT01	EBOV	0.001	36	2016-08-10 05:40:00	2016-08-10 13:22:00	1502	7.7	Pak10_A1	0.0162848
Pak10_A2_TS1	Pak10	A2	1	PaKiT01	EBOV	0.0001	36	2016-08-10 05:40:00	2016-08-10 13:25:00	156	7.75	Pak10_A2	0.00169137
Pak10_A3_TS1	Pak10	A3	1	PaKiT01	EBOV	0.0001	36	2016-08-10 05:40:00	2016-08-10 13:29:00	45	7.81667	Pak10_A3	0.000487895
Pak10_B2_TS1	Pak10	B2	1	PaKiT01	EBOV	0.0001	36	2016-08-10 05:40:00	2016-08-10 13:36:00	9	7.93333	Pak10_B2	9.7579e-05
Pak10_B1_TS1	Pak10	B1	1	PaKiT01	EBOV	0.001	36	2016-08-10 05:40:00	2016-08-10 13:41:00	2992	8.01667	Pak10_B1	0.0324396
Pak10_A1_TS2	Pak10	A1	2	PaKiT01	EBOV	0.001	36	2016-08-10 05:40:00	2016-08-10 14:43:00	2722	9.05	Pak10_A1	0.0295122
Pak10_A2_TS2	Pak10	A2	2	PaKiT01	EBOV	0.0001	36	2016-08-10 05:40:00	2016-08-10 14:45:00	555	9.08333	Pak10_A2	0.00601737
Pak10_A3_TS2	Pak10	A3	2	PaKiT01	EBOV	0.0001	36	2016-08-10 05:40:00	2016-08-10 14:47:00	158	9.11667	Pak10_A3	0.00171305
Pak10_B2_TS2	Pak10	B2	2	PaKiT01	EBOV	0.0001	36	2016-08-10 05:40:00	2016-08-10 14:54:00	439	9.23333	Pak10_B2	0.00475968
Pak10_B1_TS2	Pak10	B1	2	PaKiT01	EBOV	0.001	36	2016-08-10 05:40:00	2016-08-10 14:55:00	4208	9.25	Pak10_B1	0.0456236
Pak10_A1_TS3	Pak10	A1	3	PaKiT01	EBOV	0.001	36	2016-08-10 05:40:00	2016-08-10 16:23:00	3925	10.7167	Pak10_A1	0.0425553
Pak10_A2_TS3	Pak10	A2	3	PaKiT01	EBOV	0.0001	36	2016-08-10 05:40:00	2016-08-10 16:24:00	1056	10.7333	Pak10_A2	0.0114493
Pak10_A3_TS3	Pak10	A3	3	PaKiT01	EBOV	0.0001	36	2016-08-10 05:40:00	2016-08-10 16:25:00	925	10.75	Pak10_A3	0.0100289
Pak10_B2_TS3	Pak10	B2	3	PaKiT01	EBOV	0.0001	36	2016-08-10 05:40:00	2016-08-10 16:29:00	1013	10.8167	Pak10_B2	0.0109831
Pak10_B1_TS3	Pak10	B1	3	PaKiT01	EBOV	0.001	36	2016-08-10 05:40:00	2016-08-10 16:30:00	5860	10.8333	Pak10_B1	0.0635347
Pak10_A1_TS4	Pak10	A1	4	PaKiT01	EBOV	0.001	36	2016-08-10 05:40:00	2016-08-10 18:38:00	5083	12.9667	Pak10_A1	0.0551104
Pak10_A2_TS4	Pak10	A2	4	PaKiT01	EBOV	0.0001	36	2016-08-10 05:40:00	2016-08-10 18:39:00	1475	12.9833	Pak10_A2	0.0159921
Pak10_A3_TS4	Pak10	A3	4	PaKiT01	EBOV	0.0001	36	2016-08-10 05:40:00	2016-08-10 18:40:00	1269	13	Pak10_A3	0.0137586
Pak10_B2_TS4	Pak10	B2	4	PaKiT01	EBOV	0.0001	36	2016-08-10 05:40:00	2016-08-10 18:44:00	1351	13.0667	Pak10_B2	0.0146477
Pak10_B1_TS4	Pak10	B1	4	PaKiT01	EBOV	0.001	36	2016-08-10 05:40:00	2016-08-10 18:44:00	7967	13.0667	Pak10_B1	0.0863791
Pak10_A1_TS5	Pak10	A1	5	PaKiT01	EBOV	0.001	36	2016-08-10 05:40:00	2016-08-10 20:28:00	5619	14.8	Pak10_A1	0.0609218
Pak10_A2_TS5	Pak10	A2	5	PaKiT01	EBOV	0.0001	36	2016-08-10 05:40:00	2016-08-10 20:29:00	1643	14.8167	Pak10_A2	0.0178136
Pak10_A3_TS5	Pak10	A3	5	PaKiT01	EBOV	0.0001	36	2016-08-10 05:40:00	2016-08-10 20:30:00	1459	14.8333	Pak10_A3	0.0158186
Pak10_B2_TS5	Pak10	B2	5	PaKiT01	EBOV	0.0001	36	2016-08-10 05:40:00	2016-08-10 20:36:00	1520	14.9333	Pak10_B2	0.01648
Pak10_B1_TS5	Pak10	B1	5	PaKiT01	EBOV	0.001	36	2016-08-10 05:40:00	2016-08-10 20:36:00	8996	14.9333	Pak10_B1	0.0975356
Pak10_A1_TS6	Pak10	A1	6	PaKiT01	EBOV	0.001	36	2016-08-10 05:40:00	2016-08-10 21:58:00	5664	16.3	Pak10_A1	0.0614097
Pak10_A2_TS6	Pak10	A2	6	PaKiT01	EBOV	0.0001	36	2016-08-10 05:40:00	2016-08-10 21:59:00	1758	16.3167	Pak10_A2	0.0190604
Pak10_A3_TS6	Pak10	A3	6	PaKiT01	EBOV	0.0001	36	2016-08-10 05:40:00	2016-08-10 21:59:00	1468	16.3167	Pak10_A3	0.0159162
Pak10_B2_TS6	Pak10	B2	6	PaKiT01	EBOV	0.0001	36	2016-08-10 05:40:00	2016-08-10 22:03:00	1571	16.3833	Pak10_B2	0.0170329
Pak10_B1_TS6	Pak10	B1	6	PaKiT01	EBOV	0.001	36	2016-08-10 05:40:00	2016-08-10 22:03:00	9522	16.3833	Pak10_B1	0.103239
Pak10_A1_TS7	Pak10	A1	7	PaKiT01	EBOV	0.001	36	2016-08-10 05:40:00	2016-08-10 23:06:00	5787	17.4333	Pak10_A1	0.0627433
Pak10_A2_TS7	Pak10	A2	7	PaKiT01	EBOV	0.0001	36	2016-08-10 05:40:00	2016-08-10 23:07:00	1807	17.45	Pak10_A2	0.0195917
Pak10_A3_TS7	Pak10	A3	7	PaKiT01	EBOV	0.0001	36	2016-08-10 05:40:00	2016-08-10 23:08:00	1538	17.4667	Pak10_A3	0.0166752
Pak10_B2_TS7	Pak10	B2	7	PaKiT01	EBOV	0.0001	36	2016-08-10 05:40:00	2016-08-10 23:12:00	1680	17.5333	Pak10_B2	0.0182147
Pak10_B1_TS7	Pak10	B1	7	PaKiT01	EBOV	0.001	36	2016-08-10 05:40:00	2016-08-10 23:13:00	9654	17.55	Pak10_B1	0.10467
Pak11_A1_TS1	Pak11	A1	1	PaKiT01	VSVG	0.001	36	2016-08-13 08:12:00	2016-08-13 15:20:00	0	7.13333	Pak11_A1	0
Pak11_A2_TS1	Pak11	A2	1	PaKiT01	VSVG	0.0001	36	2016-08-13 08:12:00	2016-08-13 15:24:00	0	7.2	Pak11_A2	0
Pak11_A3_TS1	Pak11	A3	1	PaKiT01	VSVG	0.001	36	2016-08-13 08:12:00	2016-08-13 15:27:00	48	7.25	Pak11_A3	0.000520421
Pak11_B2_TS1	Pak11	B2	1	PaKiT01	VSVG	0.0001	36	2016-08-13 08:12:00	2016-08-13 15:35:00	0	7.38333	Pak11_B2	0
Pak11_B1_TS1	Pak11	B1	1	PaKiT01	VSVG	0.001	36	2016-08-13 08:12:00	2016-08-13 15:39:00	29	7.45	Pak11_B1	0.000314421
Pak11_A1_TS2	Pak11	A1	2	PaKiT01	VSVG	0.001	36	2016-08-13 08:12:00	2016-08-13 18:14:00	323	10.0333	Pak11_A1	0.003502
Pak11_A2_TS2	Pak11	A2	2	PaKiT01	VSVG	0.0001	36	2016-08-13 08:12:00	2016-08-13 18:17:00	175	10.0833	Pak11_A2	0.00189737
Pak11_A3_TS2	Pak11	A3	2	PaKiT01	VSVG	0.001	36	2016-08-13 08:12:00	2016-08-13 18:19:00	885	10.1167	Pak11_A3	0.00959526
Pak11_B2_TS2	Pak11	B2	2	PaKiT01	VSVG	0.0001	36	2016-08-13 08:12:00	2016-08-13 18:25:00	140	10.2167	Pak11_B2	0.00151789
Pak11_B1_TS2	Pak11	B1	2	PaKiT01	VSVG	0.001	36	2016-08-13 08:12:00	2016-08-13 18:27:00	734	10.25	Pak11_B1	0.00795811
Pak11_A1_TS3	Pak11	A1	3	PaKiT01	VSVG	0.001	36	2016-08-13 08:12:00	2016-08-13 20:09:00	609	11.95	Pak11_A1	0.00660284
Pak11_A2_TS3	Pak11	A2	3	PaKiT01	VSVG	0.0001	36	2016-08-13 08:12:00	2016-08-13 20:11:00	64	11.9833	Pak11_A2	0.000693895
Pak11_A3_TS3	Pak11	A3	3	PaKiT01	VSVG	0.001	36	2016-08-13 08:12:00	2016-08-13 20:13:00	1100	12.0167	Pak11_A3	0.0119263
Pak11_B2_TS3	Pak11	B2	3	PaKiT01	VSVG	0.0001	36	2016-08-13 08:12:00	2016-08-13 20:18:00	332	12.1	Pak11_B2	0.00359958
Pak11_B1_TS3	Pak11	B1	3	PaKiT01	VSVG	0.001	36	2016-08-13 08:12:00	2016-08-13 20:20:00	900	12.1333	Pak11_B1	0.0097579
Pak11_A1_TS4	Pak11	A1	4	PaKiT01	VSVG	0.001	36	2016-08-13 08:12:00	2016-08-14 03:35:00	8160	19.3833	Pak11_A1	0.0884716
Pak11_A2_TS4	Pak11	A2	4	PaKiT01	VSVG	0.0001	36	2016-08-13 08:12:00	2016-08-14 03:36:00	3337	19.4	Pak11_A2	0.0361801
Pak11_A3_TS4	Pak11	A3	4	PaKiT01	VSVG	0.001	36	2016-08-13 08:12:00	2016-08-14 03:37:00	11368	19.4167	Pak11_A3	0.123253
Pak11_B2_TS4	Pak11	B2	4	PaKiT01	VSVG	0.0001	36	2016-08-13 08:12:00	2016-08-14 03:42:00	4867	19.5	Pak11_B2	0.0527685
Pak11_B1_TS4	Pak11	B1	4	PaKiT01	VSVG	0.001	36	2016-08-13 08:12:00	2016-08-14 03:42:00	8470	19.5	Pak11_B1	0.0918326
Pak11_A1_TS5	Pak11	A1	5	PaKiT01	VSVG	0.001	36	2016-08-13 08:12:00	2016-08-14 05:35:00	11517	21.3833	Pak11_A1	0.124869
Pak11_A2_TS5	Pak11	A2	5	PaKiT01	VSVG	0.0001	36	2016-08-13 08:12:00	2016-08-14 05:35:00	4800	21.3833	Pak11_A2	0.0520421
Pak11_A3_TS5	Pak11	A3	5	PaKiT01	VSVG	0.001	36	2016-08-13 08:12:00	2016-08-14 05:36:00	13498	21.4	Pak11_A3	0.146347
Pak11_B2_TS5	Pak11	B2	5	PaKiT01	VSVG	0.0001	36	2016-08-13 08:12:00	2016-08-14 05:41:00	7480	21.4833	Pak11_B2	0.081099
Pak11_B1_TS5	Pak11	B1	5	PaKiT01	VSVG	0.001	36	2016-08-13 08:12:00	2016-08-14 05:42:00	10260	21.5	Pak11_B1	0.11124
Pak12_A1_TS1	Pak12	A1	1	PaKiT01	VSVG	0.001	36	2016-08-13 08:12:00	2016-08-13 16:35:00	523	8.38333	Pak12_A1	0.00567042
Pak12_A2_TS1	Pak12	A2	1	PaKiT01	VSVG	0.0001	36	2016-08-13 08:12:00	2016-08-13 16:39:00	43	8.45	Pak12_A2	0.000466211
Pak12_A3_TS1	Pak12	A3	1	PaKiT01	VSVG	0.001	36	2016-08-13 08:12:00	2016-08-13 16:41:00	817	8.48333	Pak12_A3	0.008858
Pak12_B2_TS1	Pak12	B2	1	PaKiT01	VSVG	0.0001	36	2016-08-13 08:12:00	2016-08-13 16:47:00	11	8.58333	Pak12_B2	0.000119263
Pak12_B1_TS1	Pak12	B1	1	PaKiT01	VSVG	0.001	36	2016-08-13 08:12:00	2016-08-13 16:49:00	646	8.61667	Pak12_B1	0.007004
Pak12_A1_TS2	Pak12	A1	2	PaKiT01	VSVG	0.001	36	2016-08-13 08:12:00	2016-08-13 18:31:00	901	10.3167	Pak12_A1	0.00976874
Pak12_A2_TS2	Pak12	A2	2	PaKiT01	VSVG	0.0001	36	2016-08-13 08:12:00	2016-08-13 18:34:00	188	10.3667	Pak12_A2	0.00203832
Pak12_A3_TS2	Pak12	A3	2	PaKiT01	VSVG	0.001	36	2016-08-13 08:12:00	2016-08-13 18:35:00	1199	10.3833	Pak12_A3	0.0129997
Pak12_B2_TS2	Pak12	B2	2	PaKiT01	VSVG	0.0001	36	2016-08-13 08:12:00	2016-08-13 18:40:00	84	10.4667	Pak12_B2	0.000910737
Pak12_B1_TS2	Pak12	B1	2	PaKiT01	VSVG	0.001	36	2016-08-13 08:12:00	2016-08-13 18:42:00	1055	10.5	Pak12_B1	0.0114384
Pak12_A1_TS3	Pak12	A1	3	PaKiT01	VSVG	0.001	36	2016-08-13 08:12:00	2016-08-13 20:35:00	1587	12.3833	Pak12_A1	0.0172064
Pak12_A2_TS3	Pak12	A2	3	PaKiT01	VSVG	0.0001	36	2016-08-13 08:12:00	2016-08-13 20:37:00	628	12.4167	Pak12_A2	0.00680884
Pak12_A3_TS3	Pak12	A3	3	PaKiT01	VSVG	0.001	36	2016-08-13 08:12:00	2016-08-13 20:39:00	1984	12.45	Pak12_A3	0.0215107
Pak12_B2_TS3	Pak12	B2	3	PaKiT01	VSVG	0.0001	36	2016-08-13 08:12:00	2016-08-13 20:43:00	567	12.5167	Pak12_B2	0.00614747
Pak12_B1_TS3	Pak12	B1	3	PaKiT01	VSVG	0.001	36	2016-08-13 08:12:00	2016-08-13 20:43:00	1994	12.5167	Pak12_B1	0.0216192
Pak12_A1_TS4	Pak12	A1	4	PaKiT01	VSVG	0.001	36	2016-08-13 08:12:00	2016-08-14 03:59:00	13687	19.7833	Pak12_A1	0.148396
Pak12_A2_TS4	Pak12	A2	4	PaKiT01	VSVG	0.0001	36	2016-08-13 08:12:00	2016-08-14 04:00:00	9035	19.8	Pak12_A2	0.0979584
Pak12_A3_TS4	Pak12	A3	4	PaKiT01	VSVG	0.001	36	2016-08-13 08:12:00	2016-08-14 04:02:00	15588	19.8333	Pak12_A3	0.169007
Pak12_B2_TS4	Pak12	B2	4	PaKiT01	VSVG	0.0001	36	2016-08-13 08:12:00	2016-08-14 04:04:00	6728	19.8667	Pak12_B2	0.0729457
Pak12_B1_TS4	Pak12	B1	4	PaKiT01	VSVG	0.001	36	2016-08-13 08:12:00	2016-08-14 04:04:00	16524	19.8667	Pak12_B1	0.179155
Pak13_A1_TS1	Pak13	A1	1	PaKiT01	VSVG	0.001	36	2016-08-13 08:12:00	2016-08-13 16:56:00	431	8.73333	Pak13_A1	0.00467295
Pak13_A2_TS1	Pak13	A2	1	PaKiT01	VSVG	0.0001	36	2016-08-13 08:12:00	2016-08-13 16:59:00	0	8.78333	Pak13_A2	0
Pak13_A3_TS1	Pak13	A3	1	PaKiT01	VSVG	0.001	36	2016-08-13 08:12:00	2016-08-13 17:01:00	736	8.81667	Pak13_A3	0.00797979
Pak13_B2_TS1	Pak13	B2	1	PaKiT01	VSVG	0.0001	36	2016-08-13 08:12:00	2016-08-13 17:08:00	103	8.93333	Pak13_B2	0.00111674
Pak13_B1_TS1	Pak13	B1	1	PaKiT01	VSVG	0.001	36	2016-08-13 08:12:00	2016-08-13 17:10:00	665	8.96667	Pak13_B1	0.00721
Pak13_A1_TS2	Pak13	A1	2	PaKiT01	VSVG	0.001	36	2016-08-13 08:12:00	2016-08-13 18:47:00	947	10.5833	Pak13_A1	0.0102675
Pak13_A2_TS2	Pak13	A2	2	PaKiT01	VSVG	0.0001	36	2016-08-13 08:12:00	2016-08-13 18:50:00	200	10.6333	Pak13_A2	0.00216842
Pak13_A3_TS2	Pak13	A3	2	PaKiT01	VSVG	0.001	36	2016-08-13 08:12:00	2016-08-13 18:51:00	1249	10.65	Pak13_A3	0.0135418
Pak13_B2_TS2	Pak13	B2	2	PaKiT01	VSVG	0.0001	36	2016-08-13 08:12:00	2016-08-13 18:57:00	147	10.75	Pak13_B2	0.00159379
Pak13_B1_TS2	Pak13	B1	2	PaKiT01	VSVG	0.001	36	2016-08-13 08:12:00	2016-08-13 19:00:00	1298	10.8	Pak13_B1	0.0140731
Pak13_A1_TS3	Pak13	A1	3	PaKiT01	VSVG	0.001	36	2016-08-13 08:12:00	2016-08-13 20:46:00	1767	12.5667	Pak13_A1	0.019158
Pak13_A2_TS3	Pak13	A2	3	PaKiT01	VSVG	0.0001	36	2016-08-13 08:12:00	2016-08-13 20:48:00	422	12.6	Pak13_A2	0.00457537
Pak13_A3_TS3	Pak13	A3	3	PaKiT01	VSVG	0.001	36	2016-08-13 08:12:00	2016-08-13 20:50:00	2240	12.6333	Pak13_A3	0.0242863
Pak13_B2_TS3	Pak13	B2	3	PaKiT01	VSVG	0.0001	36	2016-08-13 08:12:00	2016-08-13 20:55:00	816	12.7167	Pak13_B2	0.00884716
Pak13_B1_TS3	Pak13	B1	3	PaKiT01	VSVG	0.001	36	2016-08-13 08:12:00	2016-08-13 20:55:00	1986	12.7167	Pak13_B1	0.0215324
Pak13_A1_TS4	Pak13	A1	4	PaKiT01	VSVG	0.001	36	2016-08-13 08:12:00	2016-08-14 04:05:00	12000	19.8833	Pak13_A1	0.130105
Pak13_A2_TS4	Pak13	A2	4	PaKiT01	VSVG	0.0001	36	2016-08-13 08:12:00	2016-08-14 04:07:00	5340	19.9167	Pak13_A2	0.0578968
Pak13_A3_TS4	Pak13	A3	4	PaKiT01	VSVG	0.001	36	2016-08-13 08:12:00	2016-08-14 04:08:00	13168	19.9333	Pak13_A3	0.142769
Pak13_B2_TS4	Pak13	B2	4	PaKiT01	VSVG	0.0001	36	2016-08-13 08:12:00	2016-08-14 04:15:00	6458	20.05	Pak13_B2	0.0700183
Pak13_B1_TS4	Pak13	B1	4	PaKiT01	VSVG	0.001	36	2016-08-13 08:12:00	2016-08-14 04:18:00	11823	20.1	Pak13_B1	0.128186
Pak14_A1_TS1	Pak14	A1	1	PaKiT01	VSVG	0.001	36	2016-08-13 08:12:00	2016-08-13 15:44:00	2	7.53333	Pak14_A1	2.16842e-05
Pak14_A2_TS1	Pak14	A2	1	PaKiT01	VSVG	0.0001	36	2016-08-13 08:12:00	2016-08-13 15:48:00	72	7.6	Pak14_A2	0.000780632
Pak14_A3_TS1	Pak14	A3	1	PaKiT01	VSVG	0.0001	36	2016-08-13 08:12:00	2016-08-13 15:52:00	20	7.66667	Pak14_A3	0.000216842
Pak14_B2_TS1	Pak14	B2	1	PaKiT01	VSVG	0.0001	36	2016-08-13 08:12:00	2016-08-13 15:58:00	0	7.76667	Pak14_B2	0
Pak14_B1_TS1	Pak14	B1	1	PaKiT01	VSVG	0.001	36	2016-08-13 08:12:00	2016-08-13 16:03:00	1	7.85	Pak14_B1	1.08421e-05
Pak14_A1_TS2	Pak14	A1	2	PaKiT01	VSVG	0.001	36	2016-08-13 08:12:00	2016-08-13 19:03:00	1360	10.85	Pak14_A1	0.0147453
Pak14_A2_TS2	Pak14	A2	2	PaKiT01	VSVG	0.0001	36	2016-08-13 08:12:00	2016-08-13 19:08:00	144	10.9333	Pak14_A2	0.00156126
Pak14_A3_TS2	Pak14	A3	2	PaKiT01	VSVG	0.0001	36	2016-08-13 08:12:00	2016-08-13 19:10:00	231	10.9667	Pak14_A3	0.00250453
Pak14_B2_TS2	Pak14	B2	2	PaKiT01	VSVG	0.0001	36	2016-08-13 08:12:00	2016-08-13 19:16:00	136	11.0667	Pak14_B2	0.00147453
Pak14_B1_TS2	Pak14	B1	2	PaKiT01	VSVG	0.001	36	2016-08-13 08:12:00	2016-08-13 19:17:00	1271	11.0833	Pak14_B1	0.0137803
Pak14_A1_TS3	Pak14	A1	3	PaKiT01	VSVG	0.001	36	2016-08-13 08:12:00	2016-08-13 20:57:00	2264	12.75	Pak14_A1	0.0245465
Pak14_A2_TS3	Pak14	A2	3	PaKiT01	VSVG	0.0001	36	2016-08-13 08:12:00	2016-08-13 20:59:00	995	12.7833	Pak14_A2	0.0107879
Pak14_A3_TS3	Pak14	A3	3	PaKiT01	VSVG	0.0001	36	2016-08-13 08:12:00	2016-08-13 21:01:00	813	12.8167	Pak14_A3	0.00881463
Pak14_B2_TS3	Pak14	B2	3	PaKiT01	VSVG	0.0001	36	2016-08-13 08:12:00	2016-08-13 21:07:00	646	12.9167	Pak14_B2	0.007004
Pak14_B1_TS3	Pak14	B1	3	PaKiT01	VSVG	0.001	36	2016-08-13 08:12:00	2016-08-13 21:08:00	2181	12.9333	Pak14_B1	0.0236466
Pak14_A1_TS4	Pak14	A1	4	PaKiT01	VSVG	0.001	36	2016-08-13 08:12:00	2016-08-14 04:21:00	13692	20.15	Pak14_A1	0.14845
Pak14_A2_TS4	Pak14	A2	4	PaKiT01	VSVG	0.0001	36	2016-08-13 08:12:00	2016-08-14 04:22:00	5803	20.1667	Pak14_A2	0.0629167
Pak14_A3_TS4	Pak14	A3	4	PaKiT01	VSVG	0.0001	36	2016-08-13 08:12:00	2016-08-14 04:23:00	5687	20.1833	Pak14_A3	0.0616591
Pak14_B2_TS4	Pak14	B2	4	PaKiT01	VSVG	0.0001	36	2016-08-13 08:12:00	2016-08-14 04:29:00	4280	20.2833	Pak14_B2	0.0464042
Pak14_B1_TS4	Pak14	B1	4	PaKiT01	VSVG	0.001	36	2016-08-13 08:12:00	2016-08-14 04:30:00	11142	20.3	Pak14_B1	0.120803
Pak14_A1_TS5	Pak14	A1	5	PaKiT01	VSVG	0.001	36	2016-08-13 08:12:00	2016-08-14 05:46:00	14381	21.5667	Pak14_A1	0.15592
Pak14_A2_TS5	Pak14	A2	5	PaKiT01	VSVG	0.0001	36	2016-08-13 08:12:00	2016-08-14 05:47:00	7109	21.5833	Pak14_A2	0.0770765
Pak14_A3_TS5	Pak14	A3	5	PaKiT01	VSVG	0.0001	36	2016-08-13 08:12:00	2016-08-14 05:48:00	6805	21.6	Pak14_A3	0.0737805
Pak14_B2_TS5	Pak14	B2	5	PaKiT01	VSVG	0.0001	36	2016-08-13 08:12:00	2016-08-14 05:56:00	5117	21.7333	Pak14_B2	0.0554791
Pak14_B1_TS5	Pak14	B1	5	PaKiT01	VSVG	0.001	36	2016-08-13 08:12:00	2016-08-14 05:58:00	11276	21.7667	Pak14_B1	0.122256
Pak15_A1_TS1	Pak15	A1	1	PaKiT01	VSVG	0.0001	36	2016-08-15 21:26:00	2016-08-16 05:57:00	31	8.51667	Pak15_A1	0.000336105
Pak15_A3_TS1	Pak15	A3	1	PaKiT01	VSVG	0.0001	36	2016-08-15 21:26:00	2016-08-16 06:08:00	0	8.7	Pak15_A3	0
Pak15_B1_TS1	Pak15	B1	1	PaKiT01	VSVG	0.0001	36	2016-08-15 21:26:00	2016-08-16 06:18:00	0	8.86667	Pak15_B1	0
Pak15_A1_TS2	Pak15	A1	2	PaKiT01	VSVG	0.0001	36	2016-08-15 21:26:00	2016-08-16 08:20:00	33	10.9	Pak15_A1	0.00035779
Pak15_A3_TS2	Pak15	A3	2	PaKiT01	VSVG	0.0001	36	2016-08-15 21:26:00	2016-08-16 08:30:00	184	11.0667	Pak15_A3	0.00199495
Pak15_B1_TS2	Pak15	B1	2	PaKiT01	VSVG	0.0001	36	2016-08-15 21:26:00	2016-08-16 08:44:00	178	11.3	Pak15_B1	0.00192989
Pak15_A1_TS3	Pak15	A1	3	PaKiT01	VSVG	0.0001	36	2016-08-15 21:26:00	2016-08-16 12:02:00	68	14.6	Pak15_A1	0.000737263
Pak15_A3_TS3	Pak15	A3	3	PaKiT01	VSVG	0.0001	36	2016-08-15 21:26:00	2016-08-16 12:07:00	316	14.6833	Pak15_A3	0.00342611
Pak15_B1_TS3	Pak15	B1	3	PaKiT01	VSVG	0.0001	36	2016-08-15 21:26:00	2016-08-16 12:15:00	302	14.8167	Pak15_B1	0.00327432
Pak15_A1_TS4	Pak15	A1	4	PaKiT01	VSVG	0.0001	36	2016-08-15 21:26:00	2016-08-16 14:27:00	432	17.0167	Pak15_A1	0.00468379
Pak15_A3_TS4	Pak15	A3	4	PaKiT01	VSVG	0.0001	36	2016-08-15 21:26:00	2016-08-16 14:31:00	1736	17.0833	Pak15_A3	0.0188219
Pak15_B1_TS4	Pak15	B1	4	PaKiT01	VSVG	0.0001	36	2016-08-15 21:26:00	2016-08-16 14:40:00	1493	17.2333	Pak15_B1	0.0161873
Pak15_A1_TS5	Pak15	A1	5	PaKiT01	VSVG	0.0001	36	2016-08-15 21:26:00	2016-08-16 17:04:00	1293	19.6333	Pak15_A1	0.0140188
Pak15_A3_TS5	Pak15	A3	5	PaKiT01	VSVG	0.0001	36	2016-08-15 21:26:00	2016-08-16 17:06:00	3725	19.6667	Pak15_A3	0.0403868
Pak15_B1_TS5	Pak15	B1	5	PaKiT01	VSVG	0.0001	36	2016-08-15 21:26:00	2016-08-16 17:11:00	2848	19.75	Pak15_B1	0.0308783
Pak15_A1_TS6	Pak15	A1	6	PaKiT01	VSVG	0.0001	36	2016-08-15 21:26:00	2016-08-16 18:52:00	1804	21.4333	Pak15_A1	0.0195592
Pak15_A3_TS6	Pak15	A3	6	PaKiT01	VSVG	0.0001	36	2016-08-15 21:26:00	2016-08-16 18:55:00	4911	21.4833	Pak15_A3	0.0532456
Pak15_B1_TS6	Pak15	B1	6	PaKiT01	VSVG	0.0001	36	2016-08-15 21:26:00	2016-08-16 19:01:00	3923	21.5833	Pak15_B1	0.0425336
Pak15_A1_TS7	Pak15	A1	7	PaKiT01	VSVG	0.0001	36	2016-08-15 21:26:00	2016-08-17 07:28:00	4891	34.0333	Pak15_A1	0.0530287
Pak15_A3_TS7	Pak15	A3	7	PaKiT01	VSVG	0.0001	36	2016-08-15 21:26:00	2016-08-17 07:30:00	9364	34.0667	Pak15_A3	0.101525
Pak15_B1_TS7	Pak15	B1	7	PaKiT01	VSVG	0.0001	36	2016-08-15 21:26:00	2016-08-17 07:35:00	8691	34.15	Pak15_B1	0.0942287
Pak16_A1_TS1	Pak16	A1	1	PaKiT01	VSVG	0.0001	36	2016-08-15 21:26:00	2016-08-16 06:48:00	10	9.36667	Pak16_A1	0.000108421
Pak16_A3_TS1	Pak16	A3	1	PaKiT01	VSVG	0.0001	36	2016-08-15 21:26:00	2016-08-16 06:55:00	0	9.48333	Pak16_A3	0
Pak16_B1_TS1	Pak16	B1	1	PaKiT01	VSVG	0.0001	36	2016-08-15 21:26:00	2016-08-16 07:04:00	0	9.63333	Pak16_B1	0
Pak16_A1_TS2	Pak16	A1	2	PaKiT01	VSVG	0.0001	36	2016-08-15 21:26:00	2016-08-16 09:17:00	134	11.85	Pak16_A1	0.00145284
Pak16_A3_TS2	Pak16	A3	2	PaKiT01	VSVG	0.0001	36	2016-08-15 21:26:00	2016-08-16 09:23:00	67	11.95	Pak16_A3	0.000726421
Pak16_B1_TS2	Pak16	B1	2	PaKiT01	VSVG	0.0001	36	2016-08-15 21:26:00	2016-08-16 09:31:00	86	12.0833	Pak16_B1	0.000932421
Pak16_A1_TS3	Pak16	A1	3	PaKiT01	VSVG	0.0001	36	2016-08-15 21:26:00	2016-08-16 12:51:00	271	15.4167	Pak16_A1	0.00293821
Pak16_A3_TS3	Pak16	A3	3	PaKiT01	VSVG	0.0001	36	2016-08-15 21:26:00	2016-08-16 12:53:00	457	15.45	Pak16_A3	0.00495484
Pak16_B1_TS3	Pak16	B1	3	PaKiT01	VSVG	0.0001	36	2016-08-15 21:26:00	2016-08-16 13:03:00	699	15.6167	Pak16_B1	0.00757863
Pak16_A1_TS4	Pak16	A1	4	PaKiT01	VSVG	0.0001	36	2016-08-15 21:26:00	2016-08-16 14:56:00	1108	17.5	Pak16_A1	0.0120131
Pak16_A3_TS4	Pak16	A3	4	PaKiT01	VSVG	0.0001	36	2016-08-15 21:26:00	2016-08-16 15:00:00	1776	17.5667	Pak16_A3	0.0192556
Pak16_B1_TS4	Pak16	B1	4	PaKiT01	VSVG	0.0001	36	2016-08-15 21:26:00	2016-08-16 15:09:00	1614	17.7167	Pak16_B1	0.0174992
Pak16_A1_TS5	Pak16	A1	5	PaKiT01	VSVG	0.0001	36	2016-08-15 21:26:00	2016-08-16 17:30:00	2099	20.0667	Pak16_A1	0.0227576
Pak16_A3_TS5	Pak16	A3	5	PaKiT01	VSVG	0.0001	36	2016-08-15 21:26:00	2016-08-16 17:35:00	3982	20.15	Pak16_A3	0.0431733
Pak16_B1_TS5	Pak16	B1	5	PaKiT01	VSVG	0.0001	36	2016-08-15 21:26:00	2016-08-16 17:39:00	3190	20.2167	Pak16_B1	0.0345863
Pak16_A1_TS6	Pak16	A1	6	PaKiT01	VSVG	0.0001	36	2016-08-15 21:26:00	2016-08-16 19:20:00	3057	21.9	Pak16_A1	0.0331443
Pak16_A3_TS6	Pak16	A3	6	PaKiT01	VSVG	0.0001	36	2016-08-15 21:26:00	2016-08-16 19:25:00	5926	21.9833	Pak16_A3	0.0642503
Pak16_B1_TS6	Pak16	B1	6	PaKiT01	VSVG	0.0001	36	2016-08-15 21:26:00	2016-08-16 19:31:00	4510	22.0833	Pak16_B1	0.0488979
Pak17_A1_TS1	Pak17	A1	1	PaKiT01	VSVG	0.0001	36	2016-08-15 21:26:00	2016-08-16 07:09:00	0	9.71667	Pak17_A1	0
Pak17_A3_TS1	Pak17	A3	1	PaKiT01	VSVG	0.0001	36	2016-08-15 21:26:00	2016-08-16 07:20:00	97	9.9	Pak17_A3	0.00105168
Pak17_B1_TS1	Pak17	B1	1	PaKiT01	VSVG	0.0001	36	2016-08-15 21:26:00	2016-08-16 07:29:00	0	10.05	Pak17_B1	0
Pak17_A1_TS2	Pak17	A1	2	PaKiT01	VSVG	0.0001	36	2016-08-15 21:26:00	2016-08-16 09:38:00	25	12.2	Pak17_A1	0.000271053
Pak17_A3_TS2	Pak17	A3	2	PaKiT01	VSVG	0.0001	36	2016-08-15 21:26:00	2016-08-16 09:49:00	157	12.3833	Pak17_A3	0.00170221
Pak17_B1_TS2	Pak17	B1	2	PaKiT01	VSVG	0.0001	36	2016-08-15 21:26:00	2016-08-16 09:56:00	61	12.5	Pak17_B1	0.000661368
Pak17_A1_TS3	Pak17	A1	3	PaKiT01	VSVG	0.0001	36	2016-08-15 21:26:00	2016-08-16 13:11:00	275	15.75	Pak17_A1	0.00298158
Pak17_A3_TS3	Pak17	A3	3	PaKiT01	VSVG	0.0001	36	2016-08-15 21:26:00	2016-08-16 13:14:00	138	15.8	Pak17_A3	0.00149621
Pak17_B1_TS3	Pak17	B1	3	PaKiT01	VSVG	0.0001	36	2016-08-15 21:26:00	2016-08-16 13:20:00	336	15.9	Pak17_B1	0.00364295
Pak17_A1_TS4	Pak17	A1	4	PaKiT01	VSVG	0.0001	36	2016-08-15 21:26:00	2016-08-16 15:12:00	534	17.7667	Pak17_A1	0.00578968
Pak17_A3_TS4	Pak17	A3	4	PaKiT01	VSVG	0.0001	36	2016-08-15 21:26:00	2016-08-16 15:18:00	391	17.8667	Pak17_A3	0.00423926
Pak17_B1_TS4	Pak17	B1	4	PaKiT01	VSVG	0.0001	36	2016-08-15 21:26:00	2016-08-16 15:25:00	955	17.9833	Pak17_B1	0.0103542
Pak17_A1_TS5	Pak17	A1	5	PaKiT01	VSVG	0.0001	36	2016-08-15 21:26:00	2016-08-16 17:42:00	1152	20.2667	Pak17_A1	0.0124901
Pak17_A3_TS5	Pak17	A3	5	PaKiT01	VSVG	0.0001	36	2016-08-15 21:26:00	2016-08-16 17:46:00	778	20.3333	Pak17_A3	0.00843516
Pak17_B1_TS5	Pak17	B1	5	PaKiT01	VSVG	0.0001	36	2016-08-15 21:26:00	2016-08-16 17:54:00	1871	20.4667	Pak17_B1	0.0202856
Pak17_A1_TS6	Pak17	A1	6	PaKiT01	VSVG	0.0001	36	2016-08-15 21:26:00	2016-08-16 19:35:00	1645	22.15	Pak17_A1	0.0178353
Pak17_A3_TS6	Pak17	A3	6	PaKiT01	VSVG	0.0001	36	2016-08-15 21:26:00	2016-08-16 19:39:00	1067	22.2167	Pak17_A3	0.0115685
Pak17_B1_TS6	Pak17	B1	6	PaKiT01	VSVG	0.0001	36	2016-08-15 21:26:00	2016-08-16 19:44:00	2491	22.3	Pak17_B1	0.0270077
Pak17_A1_TS7	Pak17	A1	7	PaKiT01	VSVG	0.0001	36	2016-08-15 21:26:00	2016-08-17 07:40:00	3687	34.2333	Pak17_A1	0.0399748
Pak17_A3_TS7	Pak17	A3	7	PaKiT01	VSVG	0.0001	36	2016-08-15 21:26:00	2016-08-17 07:41:00	3527	34.25	Pak17_A3	0.0382401
Pak17_B1_TS7	Pak17	B1	7	PaKiT01	VSVG	0.0001	36	2016-08-15 21:26:00	2016-08-17 07:49:00	4988	34.3833	Pak17_B1	0.0540804
Pak18_A1_TS1	Pak18	A1	1	PaKiT01	VSVG	0.0001	36	2016-08-15 21:26:00	2016-08-16 07:35:00	0	10.15	Pak18_A1	0
Pak18_A3_TS1	Pak18	A3	1	PaKiT01	VSVG	0.0001	36	2016-08-15 21:26:00	2016-08-16 07:44:00	0	10.3	Pak18_A3	0
Pak18_B1_TS1	Pak18	B1	1	PaKiT01	VSVG	0.0001	36	2016-08-15 21:26:00	2016-08-16 07:54:00	0	10.4667	Pak18_B1	0
Pak18_A1_TS2	Pak18	A1	2	PaKiT01	VSVG	0.0001	36	2016-08-15 21:26:00	2016-08-16 10:07:00	216	12.6833	Pak18_A1	0.00234189
Pak18_A3_TS2	Pak18	A3	2	PaKiT01	VSVG	0.0001	36	2016-08-15 21:26:00	2016-08-16 10:13:00	23	12.7833	Pak18_A3	0.000249368
Pak18_B1_TS2	Pak18	B1	2	PaKiT01	VSVG	0.0001	36	2016-08-15 21:26:00	2016-08-16 10:22:00	296	12.9333	Pak18_B1	0.00320926
Pak18_A1_TS3	Pak18	A1	3	PaKiT01	VSVG	0.0001	36	2016-08-15 21:26:00	2016-08-16 13:28:00	546	16.0333	Pak18_A1	0.00591979
Pak18_A3_TS3	Pak18	A3	3	PaKiT01	VSVG	0.0001	36	2016-08-15 21:26:00	2016-08-16 13:33:00	196	16.1167	Pak18_A3	0.00212505
Pak18_B1_TS3	Pak18	B1	3	PaKiT01	VSVG	0.0001	36	2016-08-15 21:26:00	2016-08-16 13:41:00	380	16.25	Pak18_B1	0.00412
Pak18_A1_TS4	Pak18	A1	4	PaKiT01	VSVG	0.0001	36	2016-08-15 21:26:00	2016-08-16 15:30:00	1804	18.0667	Pak18_A1	0.0195592
Pak18_A3_TS4	Pak18	A3	4	PaKiT01	VSVG	0.0001	36	2016-08-15 21:26:00	2016-08-16 15:35:00	630	18.15	Pak18_A3	0.00683053
Pak18_B1_TS4	Pak18	B1	4	PaKiT01	VSVG	0.0001	36	2016-08-15 21:26:00	2016-08-16 15:41:00	1182	18.25	Pak18_B1	0.0128154
Pak18_A1_TS5	Pak18	A1	5	PaKiT01	VSVG	0.0001	36	2016-08-15 21:26:00	2016-08-16 17:57:00	3735	20.5167	Pak18_A1	0.0404953
Pak18_A3_TS5	Pak18	A3	5	PaKiT01	VSVG	0.0001	36	2016-08-15 21:26:00	2016-08-16 18:00:00	1598	20.5667	Pak18_A3	0.0173257
Pak18_B1_TS5	Pak18	B1	5	PaKiT01	VSVG	0.0001	36	2016-08-15 21:26:00	2016-08-16 18:06:00	2877	20.6667	Pak18_B1	0.0311927
Pak18_A1_TS6	Pak18	A1	6	PaKiT01	VSVG	0.0001	36	2016-08-15 21:26:00	2016-08-16 19:50:00	5296	22.4	Pak18_A1	0.0574198
Pak18_A3_TS6	Pak18	A3	6	PaKiT01	VSVG	0.0001	36	2016-08-15 21:26:00	2016-08-16 19:52:00	2568	22.4333	Pak18_A3	0.0278425
Pak18_B1_TS6	Pak18	B1	6	PaKiT01	VSVG	0.0001	36	2016-08-15 21:26:00	2016-08-16 19:58:00	4093	22.5333	Pak18_B1	0.0443767
Pak18_A1_TS7	Pak18	A1	7	PaKiT01	VSVG	0.0001	36	2016-08-15 21:26:00	2016-08-17 07:51:00	8777	34.4167	Pak18_A1	0.0951612
Pak18_A3_TS7	Pak18	A3	7	PaKiT01	VSVG	0.0001	36	2016-08-15 21:26:00	2016-08-17 07:54:00	8931	34.4667	Pak18_A3	0.0968309
Pak18_B1_TS7	Pak18	B1	7	PaKiT01	VSVG	0.0001	36	2016-08-15 21:26:00	2016-08-17 08:01:00	11228	34.5833	Pak18_B1	0.121735
Pak19_A1_TS1	Pak19	A1	1	PaKiT01	VSVG	0.001	36	2016-08-25 21:34:00	2016-08-26 06:40:00	10	9.1	Pak19_A1	0.000108421
Pak19_A2_TS1	Pak19	A2	1	PaKiT01	VSVG	0.0001	36	2016-08-25 21:34:00	2016-08-26 06:44:00	17	9.16667	Pak19_A2	0.000184316
Pak19_A3_TS1	Pak19	A3	1	PaKiT01	VSVG	0.001	36	2016-08-25 21:34:00	2016-08-26 06:46:00	414	9.2	Pak19_A3	0.00448863
Pak19_A1_TS2	Pak19	A1	2	PaKiT01	VSVG	0.001	36	2016-08-25 21:34:00	2016-08-26 09:43:00	646	12.15	Pak19_A1	0.007004
Pak19_A2_TS2	Pak19	A2	2	PaKiT01	VSVG	0.0001	36	2016-08-25 21:34:00	2016-08-26 09:46:00	40	12.2	Pak19_A2	0.000433684
Pak19_A3_TS2	Pak19	A3	2	PaKiT01	VSVG	0.001	36	2016-08-25 21:34:00	2016-08-26 09:48:00	1193	12.2333	Pak19_A3	0.0129346
Pak19_A1_TS3	Pak19	A1	3	PaKiT01	VSVG	0.001	36	2016-08-25 21:34:00	2016-08-26 14:51:00	2845	17.2833	Pak19_A1	0.0308458
Pak19_A2_TS3	Pak19	A2	3	PaKiT01	VSVG	0.0001	36	2016-08-25 21:34:00	2016-08-26 14:53:00	567	17.3167	Pak19_A2	0.00614747
Pak19_A3_TS3	Pak19	A3	3	PaKiT01	VSVG	0.001	36	2016-08-25 21:34:00	2016-08-26 14:54:00	3905	17.3333	Pak19_A3	0.0423384
Pak2_A1_TS1	Pak2	A1	1	PaKiT01	EBOV	0.0001	64	2016-07-22 17:15:00	2016-07-23 07:10:00	1540	13.9167	Pak2_A1	0.0166968
Pak2_A3_TS1	Pak2	A3	1	PaKiT01	EBOV	0.001	64	2016-07-22 17:15:00	2016-07-23 07:10:00	9073	13.9167	Pak2_A3	0.0983704
Pak2_B1_TS1	Pak2	B1	1	PaKiT01	EBOV	0.0001	64	2016-07-22 17:15:00	2016-07-23 07:10:00	1695	13.9167	Pak2_B1	0.0183774
Pak2_A1_TS2	Pak2	A1	2	PaKiT01	EBOV	0.0001	64	2016-07-22 17:15:00	2016-07-23 12:00:00	2446	18.75	Pak2_A1	0.0265198
Pak2_A3_TS2	Pak2	A3	2	PaKiT01	EBOV	0.001	64	2016-07-22 17:15:00	2016-07-23 12:00:00	11223	18.75	Pak2_A3	0.121681
Pak2_B1_TS2	Pak2	B1	2	PaKiT01	EBOV	0.0001	64	2016-07-22 17:15:00	2016-07-23 12:00:00	2595	18.75	Pak2_B1	0.0281353
Pak2_A1_TS3	Pak2	A1	3	PaKiT01	EBOV	0.0001	64	2016-07-22 17:15:00	2016-07-23 17:08:00	4605	23.8833	Pak2_A1	0.0499279
Pak2_A3_TS3	Pak2	A3	3	PaKiT01	EBOV	0.001	64	2016-07-22 17:15:00	2016-07-23 17:08:00	15507	23.8833	Pak2_A3	0.168129
Pak2_B1_TS3	Pak2	B1	3	PaKiT01	EBOV	0.0001	64	2016-07-22 17:15:00	2016-07-23 17:08:00	4905	23.8833	Pak2_B1	0.0531805
Pak2_A1_TS4	Pak2	A1	4	PaKiT01	EBOV	0.0001	64	2016-07-22 17:15:00	2016-07-23 22:08:00	5915	28.8833	Pak2_A1	0.0641311
Pak2_A3_TS4	Pak2	A3	4	PaKiT01	EBOV	0.001	64	2016-07-22 17:15:00	2016-07-23 22:08:00	16757	28.8833	Pak2_A3	0.181681
Pak2_B1_TS4	Pak2	B1	4	PaKiT01	EBOV	0.0001	64	2016-07-22 17:15:00	2016-07-23 22:08:00	6230	28.8833	Pak2_B1	0.0675463
Pak2_A1_TS5	Pak2	A1	5	PaKiT01	EBOV	0.0001	64	2016-07-22 17:15:00	2016-07-24 09:15:00	7365	40	Pak2_A1	0.0798521
Pak2_A3_TS5	Pak2	A3	5	PaKiT01	EBOV	0.001	64	2016-07-22 17:15:00	2016-07-24 09:15:00	11129	40	Pak2_A3	0.120662
Pak2_B1_TS5	Pak2	B1	5	PaKiT01	EBOV	0.0001	64	2016-07-22 17:15:00	2016-07-24 09:15:00	7782	40	Pak2_B1	0.0843733
Pak2_A1_TS6	Pak2	A1	6	PaKiT01	EBOV	0.0001	64	2016-07-22 17:15:00	2016-07-24 13:10:00	8201	43.9167	Pak2_A1	0.0889161
Pak2_A3_TS6	Pak2	A3	6	PaKiT01	EBOV	0.001	64	2016-07-22 17:15:00	2016-07-24 13:10:00	10028	43.9167	Pak2_A3	0.108725
Pak2_B1_TS6	Pak2	B1	6	PaKiT01	EBOV	0.0001	64	2016-07-22 17:15:00	2016-07-24 13:10:00	8665	43.9167	Pak2_B1	0.0939469
Pak2_A1_TS7	Pak2	A1	7	PaKiT01	EBOV	0.0001	64	2016-07-22 17:15:00	2016-07-24 17:15:00	9260	48	Pak2_A1	0.100398
Pak2_A3_TS7	Pak2	A3	7	PaKiT01	EBOV	0.001	64	2016-07-22 17:15:00	2016-07-24 17:15:00	8459	48	Pak2_A3	0.0917134
Pak2_B1_TS7	Pak2	B1	7	PaKiT01	EBOV	0.0001	64	2016-07-22 17:15:00	2016-07-24 17:15:00	9864	48	Pak2_B1	0.106947
Pak2_A1_TS8	Pak2	A1	8	PaKiT01	EBOV	0.0001	64	2016-07-22 17:15:00	2016-07-24 21:30:00	10084	52.25	Pak2_A1	0.109332
Pak2_A3_TS8	Pak2	A3	8	PaKiT01	EBOV	0.001	64	2016-07-22 17:15:00	2016-07-24 21:30:00	7902	52.25	Pak2_A3	0.0856743
Pak2_B1_TS8	Pak2	B1	8	PaKiT01	EBOV	0.0001	64	2016-07-22 17:15:00	2016-07-24 21:30:00	10434	52.25	Pak2_B1	0.113127
Pak2_A1_TS9	Pak2	A1	9	PaKiT01	EBOV	0.0001	64	2016-07-22 17:15:00	2016-07-25 08:17:00	8363	63.0333	Pak2_A1	0.0906725
Pak2_A3_TS9	Pak2	A3	9	PaKiT01	EBOV	0.001	64	2016-07-22 17:15:00	2016-07-25 08:21:00	5550	63.1	Pak2_A3	0.0601737
Pak2_B1_TS9	Pak2	B1	9	PaKiT01	EBOV	0.0001	64	2016-07-22 17:15:00	2016-07-25 08:29:00	8095	63.2333	Pak2_B1	0.0877669
Pak2_A1_TS10	Pak2	A1	10	PaKiT01	EBOV	0.0001	64	2016-07-22 17:15:00	2016-07-25 21:02:00	2692	75.7833	Pak2_A1	0.029187
Pak2_A3_TS10	Pak2	A3	10	PaKiT01	EBOV	0.001	64	2016-07-22 17:15:00	2016-07-25 21:06:00	1259	75.85	Pak2_A3	0.0136502
Pak2_B1_TS10	Pak2	B1	10	PaKiT01	EBOV	0.0001	64	2016-07-22 17:15:00	2016-07-25 21:18:00	2409	76.05	Pak2_B1	0.0261186
Pak2_A1_TS11	Pak2	A1	11	PaKiT01	EBOV	0.0001	64	2016-07-22 17:15:00	2016-07-26 10:19:00	2142	89.0667	Pak2_A1	0.0232238
Pak2_A3_TS11	Pak2	A3	11	PaKiT01	EBOV	0.001	64	2016-07-22 17:15:00	2016-07-26 10:24:00	978	89.15	Pak2_A3	0.0106036
Pak2_B1_TS11	Pak2	B1	11	PaKiT01	EBOV	0.0001	64	2016-07-22 17:15:00	2016-07-26 10:36:00	1708	89.35	Pak2_B1	0.0185183
Pak2_A1_TS12	Pak2	A1	12	PaKiT01	EBOV	0.0001	64	2016-07-22 17:15:00	2016-07-26 19:42:00	5737	98.45	Pak2_A1	0.0622012
Pak2_A3_TS12	Pak2	A3	12	PaKiT01	EBOV	0.001	64	2016-07-22 17:15:00	2016-07-26 19:46:00	2445	98.5167	Pak2_A3	0.026509
Pak2_B1_TS12	Pak2	B1	12	PaKiT01	EBOV	0.0001	64	2016-07-22 17:15:00	2016-07-26 19:56:00	4701	98.6833	Pak2_B1	0.0509687
Pak2_A1_TS13	Pak2	A1	13	PaKiT01	EBOV	0.0001	64	2016-07-22 17:15:00	2016-07-27 09:00:00	5540	111.75	Pak2_A1	0.0600653
Pak2_A3_TS13	Pak2	A3	13	PaKiT01	EBOV	0.001	64	2016-07-22 17:15:00	2016-07-27 09:06:00	2549	111.85	Pak2_A3	0.0276365
Pak2_B1_TS13	Pak2	B1	13	PaKiT01	EBOV	0.0001	64	2016-07-22 17:15:00	2016-07-27 09:20:00	4404	112.083	Pak2_B1	0.0477486
Pak2_A1_TS14	Pak2	A1	14	PaKiT01	EBOV	0.0001	64	2016-07-22 17:15:00	2016-07-27 18:42:00	5683	121.45	Pak2_A1	0.0616157
Pak2_A3_TS14	Pak2	A3	14	PaKiT01	EBOV	0.001	64	2016-07-22 17:15:00	2016-07-27 18:44:00	2842	121.483	Pak2_A3	0.0308133
Pak2_B1_TS14	Pak2	B1	14	PaKiT01	EBOV	0.0001	64	2016-07-22 17:15:00	2016-07-27 18:53:00	4610	121.633	Pak2_B1	0.0499821
Pak2_A1_TS15	Pak2	A1	15	PaKiT01	EBOV	0.0001	64	2016-07-22 17:15:00	2016-07-28 08:45:00	4810	135.5	Pak2_A1	0.0521505
Pak2_A3_TS15	Pak2	A3	15	PaKiT01	EBOV	0.001	64	2016-07-22 17:15:00	2016-07-28 08:50:00	2810	135.583	Pak2_A3	0.0304663
Pak2_B1_TS15	Pak2	B1	15	PaKiT01	EBOV	0.0001	64	2016-07-22 17:15:00	2016-07-28 08:57:00	3736	135.7	Pak2_B1	0.0405061
Pak2_A1_TS16	Pak2	A1	16	PaKiT01	EBOV	0.0001	64	2016-07-22 17:15:00	2016-07-28 20:15:00	4167	147	Pak2_A1	0.0451791
Pak2_A3_TS16	Pak2	A3	16	PaKiT01	EBOV	0.001	64	2016-07-22 17:15:00	2016-07-28 20:20:00	3191	147.083	Pak2_A3	0.0345972
Pak2_B1_TS16	Pak2	B1	16	PaKiT01	EBOV	0.0001	64	2016-07-22 17:15:00	2016-07-28 20:29:00	3221	147.233	Pak2_B1	0.0349224
Pak2_A1_TS17	Pak2	A1	17	PaKiT01	EBOV	0.0001	64	2016-07-22 17:15:00	2016-07-29 09:00:00	3258	159.75	Pak2_A1	0.0353236
Pak2_A3_TS17	Pak2	A3	17	PaKiT01	EBOV	0.001	64	2016-07-22 17:15:00	2016-07-29 09:04:00	2628	159.817	Pak2_A3	0.0284931
Pak2_B1_TS17	Pak2	B1	17	PaKiT01	EBOV	0.0001	64	2016-07-22 17:15:00	2016-07-29 09:15:00	2773	160	Pak2_B1	0.0300652
Pak2_A1_TS18	Pak2	A1	18	PaKiT01	EBOV	0.0001	64	2016-07-22 17:15:00	2016-07-29 20:00:00	2612	170.75	Pak2_A1	0.0283196
Pak2_A3_TS18	Pak2	A3	18	PaKiT01	EBOV	0.001	64	2016-07-22 17:15:00	2016-07-29 20:03:00	2628	170.8	Pak2_A3	0.0284931
Pak2_B1_TS18	Pak2	B1	18	PaKiT01	EBOV	0.0001	64	2016-07-22 17:15:00	2016-07-29 20:10:00	2335	170.917	Pak2_B1	0.0253163
Pak2_A1_TS19	Pak2	A1	19	PaKiT01	EBOV	0.0001	64	2016-07-22 17:15:00	2016-07-30 10:36:00	2319	185.35	Pak2_A1	0.0251428
Pak2_A3_TS19	Pak2	A3	19	PaKiT01	EBOV	0.001	64	2016-07-22 17:15:00	2016-07-30 10:39:00	2080	185.4	Pak2_A3	0.0225516
Pak2_B1_TS19	Pak2	B1	19	PaKiT01	EBOV	0.0001	64	2016-07-22 17:15:00	2016-07-30 10:49:00	2239	185.567	Pak2_B1	0.0242755
Pak20_A3_TS1	Pak20	A3	1	PaKiT01	VSVG	0.001	36	2016-08-25 21:34:00	2016-08-26 07:54:00	62	10.3333	Pak20_A3	0.000672211
Pak20_B2_TS1	Pak20	B2	1	PaKiT01	VSVG	0.0001	36	2016-08-25 21:34:00	2016-08-26 08:01:00	108	10.45	Pak20_B2	0.00117095
Pak20_B1_TS1	Pak20	B1	1	PaKiT01	VSVG	0.001	36	2016-08-25 21:34:00	2016-08-26 08:02:00	1164	10.4667	Pak20_B1	0.0126202
Pak20_A3_TS2	Pak20	A3	2	PaKiT01	VSVG	0.001	36	2016-08-25 21:34:00	2016-08-26 10:47:00	293	13.2167	Pak20_A3	0.00317674
Pak20_B2_TS2	Pak20	B2	2	PaKiT01	VSVG	0.0001	36	2016-08-25 21:34:00	2016-08-26 10:50:00	674	13.2667	Pak20_B2	0.00730758
Pak20_B1_TS2	Pak20	B1	2	PaKiT01	VSVG	0.001	36	2016-08-25 21:34:00	2016-08-26 10:51:00	2888	13.2833	Pak20_B1	0.031312
Pak20_A3_TS3	Pak20	A3	3	PaKiT01	VSVG	0.001	36	2016-08-25 21:34:00	2016-08-26 15:48:00	1206	18.2333	Pak20_A3	0.0130756
Pak20_B2_TS3	Pak20	B2	3	PaKiT01	VSVG	0.0001	36	2016-08-25 21:34:00	2016-08-26 15:55:00	5519	18.35	Pak20_B2	0.0598376
Pak20_B1_TS3	Pak20	B1	3	PaKiT01	VSVG	0.001	36	2016-08-25 21:34:00	2016-08-26 15:56:00	16872	18.3667	Pak20_B1	0.182928
Pak20_A3_TS4	Pak20	A3	4	PaKiT01	VSVG	0.001	36	2016-08-25 21:34:00	2016-08-26 17:47:00	2353	20.2167	Pak20_A3	0.0255115
Pak20_B2_TS4	Pak20	B2	4	PaKiT01	VSVG	0.0001	36	2016-08-25 21:34:00	2016-08-26 17:51:00	9819	20.2833	Pak20_B2	0.106459
Pak20_B1_TS4	Pak20	B1	4	PaKiT01	VSVG	0.001	36	2016-08-25 21:34:00	2016-08-26 17:53:00	22686	20.3167	Pak20_B1	0.245964
Pak21_A2_TS1	Pak21	A2	1	PaKiT01	VSVG	0.0001	36	2016-08-25 21:34:00	2016-08-26 08:33:00	180	10.9833	Pak21_A2	0.00195158
Pak21_A3_TS1	Pak21	A3	1	PaKiT01	VSVG	0.0001	36	2016-08-25 21:34:00	2016-08-26 08:37:00	38	11.05	Pak21_A3	0.000412
Pak21_B2_TS1	Pak21	B2	1	PaKiT01	VSVG	0.0001	36	2016-08-25 21:34:00	2016-08-26 08:43:00	154	11.15	Pak21_B2	0.00166968
Pak21_B1_TS1	Pak21	B1	1	PaKiT01	VSVG	0.001	36	2016-08-25 21:34:00	2016-08-26 08:43:00	1488	11.15	Pak21_B1	0.0161331
Pak21_A2_TS2	Pak21	A2	2	PaKiT01	VSVG	0.0001	36	2016-08-25 21:34:00	2016-08-26 11:12:00	150	13.6333	Pak21_A2	0.00162632
Pak21_A3_TS2	Pak21	A3	2	PaKiT01	VSVG	0.0001	36	2016-08-25 21:34:00	2016-08-26 11:15:00	185	13.6833	Pak21_A3	0.00200579
Pak21_B2_TS2	Pak21	B2	2	PaKiT01	VSVG	0.0001	36	2016-08-25 21:34:00	2016-08-26 11:20:00	773	13.7667	Pak21_B2	0.00838095
Pak21_B1_TS2	Pak21	B1	2	PaKiT01	VSVG	0.001	36	2016-08-25 21:34:00	2016-08-26 11:21:00	3255	13.7833	Pak21_B1	0.0352911
Pak21_A2_TS3	Pak21	A2	3	PaKiT01	VSVG	0.0001	36	2016-08-25 21:34:00	2016-08-26 16:31:00	1764	18.95	Pak21_A2	0.0191255
Pak21_A3_TS3	Pak21	A3	3	PaKiT01	VSVG	0.0001	36	2016-08-25 21:34:00	2016-08-26 16:33:00	1619	18.9833	Pak21_A3	0.0175534
Pak21_B2_TS3	Pak21	B2	3	PaKiT01	VSVG	0.0001	36	2016-08-25 21:34:00	2016-08-26 16:37:00	5591	19.05	Pak21_B2	0.0606182
Pak21_B1_TS3	Pak21	B1	3	PaKiT01	VSVG	0.001	36	2016-08-25 21:34:00	2016-08-26 16:38:00	17046	19.0667	Pak21_B1	0.184815
Pak21_A2_TS4	Pak21	A2	4	PaKiT01	VSVG	0.0001	36	2016-08-25 21:34:00	2016-08-26 18:36:00	3005	21.0333	Pak21_A2	0.0325805
Pak21_A3_TS4	Pak21	A3	4	PaKiT01	VSVG	0.0001	36	2016-08-25 21:34:00	2016-08-26 18:38:00	3286	21.0667	Pak21_A3	0.0356272
Pak21_B2_TS4	Pak21	B2	4	PaKiT01	VSVG	0.0001	36	2016-08-25 21:34:00	2016-08-26 18:44:00	10460	21.1667	Pak21_B2	0.113408
Pak21_B1_TS4	Pak21	B1	4	PaKiT01	VSVG	0.001	36	2016-08-25 21:34:00	2016-08-26 18:45:00	21541	21.1833	Pak21_B1	0.23355
Pak21_A2_TS5	Pak21	A2	5	PaKiT01	VSVG	0.0001	36	2016-08-25 21:34:00	2016-08-26 21:44:00	5926	24.1667	Pak21_A2	0.0642503
Pak21_A3_TS5	Pak21	A3	5	PaKiT01	VSVG	0.0001	36	2016-08-25 21:34:00	2016-08-26 21:46:00	5439	24.2	Pak21_A3	0.0589702
Pak21_B2_TS5	Pak21	B2	5	PaKiT01	VSVG	0.0001	36	2016-08-25 21:34:00	2016-08-26 21:52:00	19152	24.3	Pak21_B2	0.207648
Pak21_B1_TS5	Pak21	B1	5	PaKiT01	VSVG	0.001	36	2016-08-25 21:34:00	2016-08-26 21:54:00	28557	24.3333	Pak21_B1	0.309618
Pak22_A1_TS1	Pak22	A1	1	PaKiT01	VSVG	0.001	36	2016-08-25 21:34:00	2016-08-26 09:08:00	942	11.5667	Pak22_A1	0.0102133
Pak22_A2_TS1	Pak22	A2	1	PaKiT01	VSVG	0.0001	36	2016-08-25 21:34:00	2016-08-26 09:09:00	353	11.5833	Pak22_A2	0.00382726
Pak22_A3_TS1	Pak22	A3	1	PaKiT01	VSVG	0.0001	36	2016-08-25 21:34:00	2016-08-26 09:10:00	322	11.6	Pak22_A3	0.00349116
Pak22_B2_TS1	Pak22	B2	1	PaKiT01	VSVG	0.0001	36	2016-08-25 21:34:00	2016-08-26 09:16:00	316	11.7	Pak22_B2	0.00342611
Pak22_B1_TS1	Pak22	B1	1	PaKiT01	VSVG	0.001	36	2016-08-25 21:34:00	2016-08-26 09:16:00	1967	11.7	Pak22_B1	0.0213264
Pak22_A1_TS2	Pak22	A1	2	PaKiT01	VSVG	0.001	36	2016-08-25 21:34:00	2016-08-26 11:40:00	1954	14.1	Pak22_A1	0.0211855
Pak22_A2_TS2	Pak22	A2	2	PaKiT01	VSVG	0.0001	36	2016-08-25 21:34:00	2016-08-26 11:41:00	1145	14.1167	Pak22_A2	0.0124142
Pak22_A3_TS2	Pak22	A3	2	PaKiT01	VSVG	0.0001	36	2016-08-25 21:34:00	2016-08-26 11:42:00	1267	14.1333	Pak22_A3	0.0137369
Pak22_B2_TS2	Pak22	B2	2	PaKiT01	VSVG	0.0001	36	2016-08-25 21:34:00	2016-08-26 11:47:00	1018	14.2167	Pak22_B2	0.0110373
Pak22_B1_TS2	Pak22	B1	2	PaKiT01	VSVG	0.001	36	2016-08-25 21:34:00	2016-08-26 11:48:00	3865	14.2333	Pak22_B1	0.0419047
Pak22_A1_TS3	Pak22	A1	3	PaKiT01	VSVG	0.001	36	2016-08-25 21:34:00	2016-08-26 17:01:00	11366	19.45	Pak22_A1	0.123231
Pak22_A2_TS3	Pak22	A2	3	PaKiT01	VSVG	0.0001	36	2016-08-25 21:34:00	2016-08-26 17:03:00	7225	19.4833	Pak22_A2	0.0783342
Pak22_A3_TS3	Pak22	A3	3	PaKiT01	VSVG	0.0001	36	2016-08-25 21:34:00	2016-08-26 17:04:00	6970	19.5	Pak22_A3	0.0755695
Pak22_B2_TS3	Pak22	B2	3	PaKiT01	VSVG	0.0001	36	2016-08-25 21:34:00	2016-08-26 17:09:00	7649	19.5833	Pak22_B2	0.0829313
Pak22_B1_TS3	Pak22	B1	3	PaKiT01	VSVG	0.001	36	2016-08-25 21:34:00	2016-08-26 17:10:00	18771	19.6	Pak22_B1	0.203517
Pak22_A1_TS4	Pak22	A1	4	PaKiT01	VSVG	0.001	36	2016-08-25 21:34:00	2016-08-26 19:04:00	18312	21.5	Pak22_A1	0.198541
Pak22_A2_TS4	Pak22	A2	4	PaKiT01	VSVG	0.0001	36	2016-08-25 21:34:00	2016-08-26 19:06:00	12260	21.5333	Pak22_A2	0.132924
Pak22_A3_TS4	Pak22	A3	4	PaKiT01	VSVG	0.0001	36	2016-08-25 21:34:00	2016-08-26 19:08:00	12825	21.5667	Pak22_A3	0.13905
Pak22_B2_TS4	Pak22	B2	4	PaKiT01	VSVG	0.0001	36	2016-08-25 21:34:00	2016-08-26 19:12:00	13401	21.6333	Pak22_B2	0.145295
Pak22_B1_TS4	Pak22	B1	4	PaKiT01	VSVG	0.001	36	2016-08-25 21:34:00	2016-08-26 19:14:00	24586	21.6667	Pak22_B1	0.266564
Pak22_A1_TS5	Pak22	A1	5	PaKiT01	VSVG	0.001	36	2016-08-25 21:34:00	2016-08-26 22:28:00	25513	24.9	Pak22_A1	0.276615
Pak22_A2_TS5	Pak22	A2	5	PaKiT01	VSVG	0.0001	36	2016-08-25 21:34:00	2016-08-26 22:30:00	20767	24.9333	Pak22_A2	0.225158
Pak22_A3_TS5	Pak22	A3	5	PaKiT01	VSVG	0.0001	36	2016-08-25 21:34:00	2016-08-26 22:31:00	21309	24.95	Pak22_A3	0.231034
Pak22_B2_TS5	Pak22	B2	5	PaKiT01	VSVG	0.0001	36	2016-08-25 21:34:00	2016-08-26 22:36:00	21392	25.0333	Pak22_B2	0.231934
Pak22_B1_TS5	Pak22	B1	5	PaKiT01	VSVG	0.001	36	2016-08-25 21:34:00	2016-08-26 22:37:00	29704	25.05	Pak22_B1	0.322054
Pak22_A1_TS6	Pak22	A1	6	PaKiT01	VSVG	0.001	36	2016-08-25 21:34:00	2016-08-27 09:05:00	17710	35.5167	Pak22_A1	0.192014
Pak22_A2_TS6	Pak22	A2	6	PaKiT01	VSVG	0.0001	36	2016-08-25 21:34:00	2016-08-27 09:06:00	15306	35.5333	Pak22_A2	0.165949
Pak22_A3_TS6	Pak22	A3	6	PaKiT01	VSVG	0.0001	36	2016-08-25 21:34:00	2016-08-27 09:07:00	18068	35.55	Pak22_A3	0.195895
Pak22_B2_TS6	Pak22	B2	6	PaKiT01	VSVG	0.0001	36	2016-08-25 21:34:00	2016-08-27 09:10:00	19424	35.6	Pak22_B2	0.210597
Pak22_B1_TS6	Pak22	B1	6	PaKiT01	VSVG	0.001	36	2016-08-25 21:34:00	2016-08-27 09:11:00	14808	35.6167	Pak22_B1	0.16055
Pak23_A1_TS1	Pak23	A1	1	PaKiT01	EBOV	0.001	36	2016-08-28 05:30:00	2016-08-28 11:32:00	22	6.03333	Pak23_A1	0.000238526
Pak23_A2_TS1	Pak23	A2	1	PaKiT01	EBOV	0.0001	36	2016-08-28 05:30:00	2016-08-28 11:36:00	0	6.1	Pak23_A2	0
Pak23_A3_TS1	Pak23	A3	1	PaKiT01	EBOV	0.001	36	2016-08-28 05:30:00	2016-08-28 11:39:00	282	6.15	Pak23_A3	0.00305747
Pak23_B2_TS1	Pak23	B2	1	PaKiT01	EBOV	0.0001	36	2016-08-28 05:30:00	2016-08-28 11:47:00	35	6.28333	Pak23_B2	0.000379474
Pak23_B1_TS1	Pak23	B1	1	PaKiT01	EBOV	0.001	36	2016-08-28 05:30:00	2016-08-28 11:52:00	0	6.36667	Pak23_B1	0
Pak23_A1_TS2	Pak23	A1	2	PaKiT01	EBOV	0.001	36	2016-08-28 05:30:00	2016-08-28 15:35:00	2083	10.0833	Pak23_A1	0.0225841
Pak23_A2_TS2	Pak23	A2	2	PaKiT01	EBOV	0.0001	36	2016-08-28 05:30:00	2016-08-28 15:36:00	357	10.1	Pak23_A2	0.00387063
Pak23_A3_TS2	Pak23	A3	2	PaKiT01	EBOV	0.001	36	2016-08-28 05:30:00	2016-08-28 15:38:00	3059	10.1333	Pak23_A3	0.033166
Pak23_B2_TS2	Pak23	B2	2	PaKiT01	EBOV	0.0001	36	2016-08-28 05:30:00	2016-08-28 15:42:00	261	10.2	Pak23_B2	0.00282979
Pak23_B1_TS2	Pak23	B1	2	PaKiT01	EBOV	0.001	36	2016-08-28 05:30:00	2016-08-28 15:44:00	1709	10.2333	Pak23_B1	0.0185292
Pak23_A1_TS3	Pak23	A1	3	PaKiT01	EBOV	0.001	36	2016-08-28 05:30:00	2016-08-28 19:49:00	2785	14.3167	Pak23_A1	0.0301953
Pak23_A2_TS3	Pak23	A2	3	PaKiT01	EBOV	0.0001	36	2016-08-28 05:30:00	2016-08-28 19:50:00	525	14.3333	Pak23_A2	0.00569211
Pak23_A3_TS3	Pak23	A3	3	PaKiT01	EBOV	0.001	36	2016-08-28 05:30:00	2016-08-28 19:51:00	4227	14.35	Pak23_A3	0.0458296
Pak23_B2_TS3	Pak23	B2	3	PaKiT01	EBOV	0.0001	36	2016-08-28 05:30:00	2016-08-28 19:55:00	865	14.4167	Pak23_B2	0.00937842
Pak23_B1_TS3	Pak23	B1	3	PaKiT01	EBOV	0.001	36	2016-08-28 05:30:00	2016-08-28 19:56:00	3024	14.4333	Pak23_B1	0.0327865
Pak23_A1_TS4	Pak23	A1	4	PaKiT01	EBOV	0.001	36	2016-08-28 05:30:00	2016-08-28 22:38:00	2982	17.1333	Pak23_A1	0.0323312
Pak23_A2_TS4	Pak23	A2	4	PaKiT01	EBOV	0.0001	36	2016-08-28 05:30:00	2016-08-28 22:39:00	696	17.15	Pak23_A2	0.00754611
Pak23_A3_TS4	Pak23	A3	4	PaKiT01	EBOV	0.001	36	2016-08-28 05:30:00	2016-08-28 22:40:00	4804	17.1667	Pak23_A3	0.0520855
Pak23_B2_TS4	Pak23	B2	4	PaKiT01	EBOV	0.0001	36	2016-08-28 05:30:00	2016-08-28 22:45:00	1043	17.25	Pak23_B2	0.0113083
Pak23_B1_TS4	Pak23	B1	4	PaKiT01	EBOV	0.001	36	2016-08-28 05:30:00	2016-08-28 22:46:00	3485	17.2667	Pak23_B1	0.0377847
Pak23_A1_TS5	Pak23	A1	5	PaKiT01	EBOV	0.001	36	2016-08-28 05:30:00	2016-08-29 09:20:00	3875	27.8333	Pak23_A1	0.0420132
Pak23_A2_TS5	Pak23	A2	5	PaKiT01	EBOV	0.0001	36	2016-08-28 05:30:00	2016-08-29 09:21:00	1782	27.85	Pak23_A2	0.0193206
Pak23_A3_TS5	Pak23	A3	5	PaKiT01	EBOV	0.001	36	2016-08-28 05:30:00	2016-08-29 09:22:00	6206	27.8667	Pak23_A3	0.0672861
Pak23_B2_TS5	Pak23	B2	5	PaKiT01	EBOV	0.0001	36	2016-08-28 05:30:00	2016-08-29 09:26:00	2130	27.9333	Pak23_B2	0.0230937
Pak23_B1_TS5	Pak23	B1	5	PaKiT01	EBOV	0.001	36	2016-08-28 05:30:00	2016-08-29 09:27:00	5399	27.95	Pak23_B1	0.0585365
Pak23_A1_TS6	Pak23	A1	6	PaKiT01	EBOV	0.001	36	2016-08-28 05:30:00	2016-08-29 20:34:00	9217	39.0667	Pak23_A1	0.0999317
Pak23_A2_TS6	Pak23	A2	6	PaKiT01	EBOV	0.0001	36	2016-08-28 05:30:00	2016-08-29 20:35:00	4712	39.0833	Pak23_A2	0.051088
Pak23_A3_TS6	Pak23	A3	6	PaKiT01	EBOV	0.001	36	2016-08-28 05:30:00	2016-08-29 20:36:00	7898	39.1	Pak23_A3	0.085631
Pak23_B2_TS6	Pak23	B2	6	PaKiT01	EBOV	0.0001	36	2016-08-28 05:30:00	2016-08-29 20:40:00	4652	39.1667	Pak23_B2	0.0504375
Pak23_B1_TS6	Pak23	B1	6	PaKiT01	EBOV	0.001	36	2016-08-28 05:30:00	2016-08-29 20:41:00	7525	39.1833	Pak23_B1	0.0815869
Pak24_A1_TS1	Pak24	A1	1	PaKiT01	EBOV	0.001	36	2016-08-28 05:30:00	2016-08-28 11:57:00	433	6.45	Pak24_A1	0.00469463
Pak24_A2_TS1	Pak24	A2	1	PaKiT01	EBOV	0.0001	36	2016-08-28 05:30:00	2016-08-28 12:00:00	0	6.5	Pak24_A2	0
Pak24_A3_TS1	Pak24	A3	1	PaKiT01	EBOV	0.001	36	2016-08-28 05:30:00	2016-08-28 12:03:00	432	6.55	Pak24_A3	0.00468379
Pak24_B2_TS1	Pak24	B2	1	PaKiT01	EBOV	0.0001	36	2016-08-28 05:30:00	2016-08-28 12:04:00	1	6.56667	Pak24_B2	1.08421e-05
Pak24_B1_TS1	Pak24	B1	1	PaKiT01	EBOV	0.001	36	2016-08-28 05:30:00	2016-08-28 12:14:00	0	6.73333	Pak24_B1	0
Pak24_A1_TS2	Pak24	A1	2	PaKiT01	EBOV	0.001	36	2016-08-28 05:30:00	2016-08-28 15:51:00	2532	10.35	Pak24_A1	0.0274522
Pak24_A2_TS2	Pak24	A2	2	PaKiT01	EBOV	0.0001	36	2016-08-28 05:30:00	2016-08-28 15:53:00	32	10.3833	Pak24_A2	0.000346947
Pak24_A3_TS2	Pak24	A3	2	PaKiT01	EBOV	0.001	36	2016-08-28 05:30:00	2016-08-28 15:55:00	1905	10.4167	Pak24_A3	0.0206542
Pak24_B2_TS2	Pak24	B2	2	PaKiT01	EBOV	0.0001	36	2016-08-28 05:30:00	2016-08-28 16:00:00	297	10.5	Pak24_B2	0.00322011
Pak24_B1_TS2	Pak24	B1	2	PaKiT01	EBOV	0.001	36	2016-08-28 05:30:00	2016-08-28 16:00:00	1885	10.5	Pak24_B1	0.0204374
Pak24_A1_TS3	Pak24	A1	3	PaKiT01	EBOV	0.001	36	2016-08-28 05:30:00	2016-08-28 20:02:00	3609	14.5333	Pak24_A1	0.0391292
Pak24_A2_TS3	Pak24	A2	3	PaKiT01	EBOV	0.0001	36	2016-08-28 05:30:00	2016-08-28 20:03:00	594	14.55	Pak24_A2	0.00644021
Pak24_A3_TS3	Pak24	A3	3	PaKiT01	EBOV	0.001	36	2016-08-28 05:30:00	2016-08-28 20:03:00	3147	14.55	Pak24_A3	0.0341201
Pak24_B2_TS3	Pak24	B2	3	PaKiT01	EBOV	0.0001	36	2016-08-28 05:30:00	2016-08-28 20:08:00	723	14.6333	Pak24_B2	0.00783884
Pak24_B1_TS3	Pak24	B1	3	PaKiT01	EBOV	0.001	36	2016-08-28 05:30:00	2016-08-28 20:08:00	3030	14.6333	Pak24_B1	0.0328516
Pak24_A1_TS4	Pak24	A1	4	PaKiT01	EBOV	0.001	36	2016-08-28 05:30:00	2016-08-28 22:47:00	4062	17.2833	Pak24_A1	0.0440406
Pak24_A2_TS4	Pak24	A2	4	PaKiT01	EBOV	0.0001	36	2016-08-28 05:30:00	2016-08-28 22:48:00	749	17.3	Pak24_A2	0.00812074
Pak24_A3_TS4	Pak24	A3	4	PaKiT01	EBOV	0.001	36	2016-08-28 05:30:00	2016-08-28 22:49:00	3675	17.3167	Pak24_A3	0.0398447
Pak24_B2_TS4	Pak24	B2	4	PaKiT01	EBOV	0.0001	36	2016-08-28 05:30:00	2016-08-28 22:54:00	854	17.4	Pak24_B2	0.00925916
Pak24_B1_TS4	Pak24	B1	4	PaKiT01	EBOV	0.001	36	2016-08-28 05:30:00	2016-08-28 22:55:00	3312	17.4167	Pak24_B1	0.0359091
Pak24_A1_TS5	Pak24	A1	5	PaKiT01	EBOV	0.001	36	2016-08-28 05:30:00	2016-08-29 09:36:00	3476	28.1	Pak24_A1	0.0376872
Pak24_A2_TS5	Pak24	A2	5	PaKiT01	EBOV	0.0001	36	2016-08-28 05:30:00	2016-08-29 09:37:00	1508	28.1167	Pak24_A2	0.0163499
Pak24_A3_TS5	Pak24	A3	5	PaKiT01	EBOV	0.001	36	2016-08-28 05:30:00	2016-08-29 09:38:00	5211	28.1333	Pak24_A3	0.0564982
Pak24_B2_TS5	Pak24	B2	5	PaKiT01	EBOV	0.0001	36	2016-08-28 05:30:00	2016-08-29 09:41:00	1500	28.1833	Pak24_B2	0.0162632
Pak24_B1_TS5	Pak24	B1	5	PaKiT01	EBOV	0.001	36	2016-08-28 05:30:00	2016-08-29 09:42:00	5437	28.2	Pak24_B1	0.0589485
Pak25_A1_TS1	Pak25	A1	1	PaKiT01	EBOV	0.001	36	2016-08-28 05:30:00	2016-08-28 12:22:00	15	6.86667	Pak25_A1	0.000162632
Pak25_A2_TS1	Pak25	A2	1	PaKiT01	EBOV	0.0001	36	2016-08-28 05:30:00	2016-08-28 12:26:00	0	6.93333	Pak25_A2	0
Pak25_A3_TS1	Pak25	A3	1	PaKiT01	EBOV	0.0001	36	2016-08-28 05:30:00	2016-08-28 12:29:00	0	6.98333	Pak25_A3	0
Pak25_B2_TS1	Pak25	B2	1	PaKiT01	EBOV	0.0001	36	2016-08-28 05:30:00	2016-08-28 12:37:00	25	7.11667	Pak25_B2	0.000271053
Pak25_B1_TS1	Pak25	B1	1	PaKiT01	EBOV	0.001	36	2016-08-28 05:30:00	2016-08-28 12:41:00	110	7.18333	Pak25_B1	0.00119263
Pak25_A1_TS2	Pak25	A1	2	PaKiT01	EBOV	0.001	36	2016-08-28 05:30:00	2016-08-28 16:58:00	1949	11.4667	Pak25_A1	0.0211313
Pak25_A2_TS2	Pak25	A2	2	PaKiT01	EBOV	0.0001	36	2016-08-28 05:30:00	2016-08-28 17:00:00	353	11.5	Pak25_A2	0.00382726
Pak25_A3_TS2	Pak25	A3	2	PaKiT01	EBOV	0.0001	36	2016-08-28 05:30:00	2016-08-28 17:02:00	361	11.5333	Pak25_A3	0.003914
Pak25_B2_TS2	Pak25	B2	2	PaKiT01	EBOV	0.0001	36	2016-08-28 05:30:00	2016-08-28 17:06:00	453	11.6	Pak25_B2	0.00491147
Pak25_B1_TS2	Pak25	B1	2	PaKiT01	EBOV	0.001	36	2016-08-28 05:30:00	2016-08-28 17:08:00	2125	11.6333	Pak25_B1	0.0230395
Pak25_A1_TS3	Pak25	A1	3	PaKiT01	EBOV	0.001	36	2016-08-28 05:30:00	2016-08-28 20:57:00	2477	15.45	Pak25_A1	0.0268559
Pak25_A2_TS3	Pak25	A2	3	PaKiT01	EBOV	0.0001	36	2016-08-28 05:30:00	2016-08-28 20:59:00	681	15.4833	Pak25_A2	0.00738347
Pak25_A3_TS3	Pak25	A3	3	PaKiT01	EBOV	0.0001	36	2016-08-28 05:30:00	2016-08-28 21:00:00	872	15.5	Pak25_A3	0.00945432
Pak25_B2_TS3	Pak25	B2	3	PaKiT01	EBOV	0.0001	36	2016-08-28 05:30:00	2016-08-28 21:04:00	764	15.5667	Pak25_B2	0.00828337
Pak25_B1_TS3	Pak25	B1	3	PaKiT01	EBOV	0.001	36	2016-08-28 05:30:00	2016-08-28 21:05:00	3006	15.5833	Pak25_B1	0.0325914
Pak25_A1_TS4	Pak25	A1	4	PaKiT01	EBOV	0.001	36	2016-08-28 05:30:00	2016-08-28 23:47:00	2727	18.2833	Pak25_A1	0.0295664
Pak25_A2_TS4	Pak25	A2	4	PaKiT01	EBOV	0.0001	36	2016-08-28 05:30:00	2016-08-28 23:49:00	855	18.3167	Pak25_A2	0.00927
Pak25_A3_TS4	Pak25	A3	4	PaKiT01	EBOV	0.0001	36	2016-08-28 05:30:00	2016-08-28 23:50:00	1086	18.3333	Pak25_A3	0.0117745
Pak25_B2_TS4	Pak25	B2	4	PaKiT01	EBOV	0.0001	36	2016-08-28 05:30:00	2016-08-28 23:54:00	875	18.4	Pak25_B2	0.00948684
Pak25_B1_TS4	Pak25	B1	4	PaKiT01	EBOV	0.001	36	2016-08-28 05:30:00	2016-08-28 23:54:00	3629	18.4	Pak25_B1	0.039346
Pak25_A1_TS5	Pak25	A1	5	PaKiT01	EBOV	0.001	36	2016-08-28 05:30:00	2016-08-29 10:56:00	3811	29.4333	Pak25_A1	0.0413193
Pak25_A2_TS5	Pak25	A2	5	PaKiT01	EBOV	0.0001	36	2016-08-28 05:30:00	2016-08-29 10:57:00	2213	29.45	Pak25_A2	0.0239936
Pak25_A3_TS5	Pak25	A3	5	PaKiT01	EBOV	0.0001	36	2016-08-28 05:30:00	2016-08-29 10:58:00	1482	29.4667	Pak25_A3	0.016068
Pak25_B2_TS5	Pak25	B2	5	PaKiT01	EBOV	0.0001	36	2016-08-28 05:30:00	2016-08-29 11:02:00	2015	29.5333	Pak25_B2	0.0218468
Pak25_B1_TS5	Pak25	B1	5	PaKiT01	EBOV	0.001	36	2016-08-28 05:30:00	2016-08-29 11:03:00	4961	29.55	Pak25_B1	0.0537877
Pak25_A1_TS6	Pak25	A1	6	PaKiT01	EBOV	0.001	36	2016-08-28 05:30:00	2016-08-29 21:18:00	4466	39.8	Pak25_A1	0.0484208
Pak25_A2_TS6	Pak25	A2	6	PaKiT01	EBOV	0.0001	36	2016-08-28 05:30:00	2016-08-29 21:19:00	1732	39.8167	Pak25_A2	0.0187785
Pak25_A3_TS6	Pak25	A3	6	PaKiT01	EBOV	0.0001	36	2016-08-28 05:30:00	2016-08-29 21:20:00	2093	39.8333	Pak25_A3	0.0226925
Pak25_B2_TS6	Pak25	B2	6	PaKiT01	EBOV	0.0001	36	2016-08-28 05:30:00	2016-08-29 21:26:00	3435	39.9333	Pak25_B2	0.0372426
Pak25_B1_TS6	Pak25	B1	6	PaKiT01	EBOV	0.001	36	2016-08-28 05:30:00	2016-08-29 21:27:00	5596	39.95	Pak25_B1	0.0606724
Pak25_A1_TS7	Pak25	A1	7	PaKiT01	EBOV	0.001	36	2016-08-28 05:30:00	2016-08-30 07:45:00	4784	50.25	Pak25_A1	0.0518686
Pak25_A2_TS7	Pak25	A2	7	PaKiT01	EBOV	0.0001	36	2016-08-28 05:30:00	2016-08-30 07:46:00	491	50.2667	Pak25_A2	0.00532347
Pak25_A3_TS7	Pak25	A3	7	PaKiT01	EBOV	0.0001	36	2016-08-28 05:30:00	2016-08-30 07:46:00	1665	50.2667	Pak25_A3	0.0180521
Pak25_B2_TS7	Pak25	B2	7	PaKiT01	EBOV	0.0001	36	2016-08-28 05:30:00	2016-08-30 07:51:00	3792	50.35	Pak25_B2	0.0411133
Pak25_B1_TS7	Pak25	B1	7	PaKiT01	EBOV	0.001	36	2016-08-28 05:30:00	2016-08-30 07:51:00	4584	50.35	Pak25_B1	0.0497002
Pak26_A1_TS1	Pak26	A1	1	PaKiT01	EBOV	0.001	36	2016-08-28 05:30:00	2016-08-28 14:01:00	577	8.51667	Pak26_A1	0.0062559
Pak26_A2_TS1	Pak26	A2	1	PaKiT01	EBOV	0.0001	36	2016-08-28 05:30:00	2016-08-28 14:04:00	25	8.56667	Pak26_A2	0.000271053
Pak26_A3_TS1	Pak26	A3	1	PaKiT01	EBOV	0.0001	36	2016-08-28 05:30:00	2016-08-28 14:07:00	173	8.61667	Pak26_A3	0.00187568
Pak26_B2_TS1	Pak26	B2	1	PaKiT01	EBOV	0.0001	36	2016-08-28 05:30:00	2016-08-28 14:13:00	59	8.71667	Pak26_B2	0.000639684
Pak26_B1_TS1	Pak26	B1	1	PaKiT01	EBOV	0.001	36	2016-08-28 05:30:00	2016-08-28 14:16:00	134	8.76667	Pak26_B1	0.00145284
Pak26_A1_TS2	Pak26	A1	2	PaKiT01	EBOV	0.001	36	2016-08-28 05:30:00	2016-08-28 17:34:00	2379	12.0667	Pak26_A1	0.0257934
Pak26_A2_TS2	Pak26	A2	2	PaKiT01	EBOV	0.0001	36	2016-08-28 05:30:00	2016-08-28 17:35:00	346	12.0833	Pak26_A2	0.00375137
Pak26_A3_TS2	Pak26	A3	2	PaKiT01	EBOV	0.0001	36	2016-08-28 05:30:00	2016-08-28 17:37:00	458	12.1167	Pak26_A3	0.00496568
Pak26_B2_TS2	Pak26	B2	2	PaKiT01	EBOV	0.0001	36	2016-08-28 05:30:00	2016-08-28 17:46:00	599	12.2667	Pak26_B2	0.00649442
Pak26_B1_TS2	Pak26	B1	2	PaKiT01	EBOV	0.001	36	2016-08-28 05:30:00	2016-08-28 17:51:00	2103	12.35	Pak26_B1	0.0228009
Pak26_A1_TS3	Pak26	A1	3	PaKiT01	EBOV	0.001	36	2016-08-28 05:30:00	2016-08-28 21:13:00	2889	15.7167	Pak26_A1	0.0313228
Pak26_A2_TS3	Pak26	A2	3	PaKiT01	EBOV	0.0001	36	2016-08-28 05:30:00	2016-08-28 21:14:00	745	15.7333	Pak26_A2	0.00807737
Pak26_A3_TS3	Pak26	A3	3	PaKiT01	EBOV	0.0001	36	2016-08-28 05:30:00	2016-08-28 21:15:00	712	15.75	Pak26_A3	0.00771958
Pak26_B2_TS3	Pak26	B2	3	PaKiT01	EBOV	0.0001	36	2016-08-28 05:30:00	2016-08-28 21:18:00	964	15.8	Pak26_B2	0.0104518
Pak26_B1_TS3	Pak26	B1	3	PaKiT01	EBOV	0.001	36	2016-08-28 05:30:00	2016-08-28 21:19:00	2598	15.8167	Pak26_B1	0.0281678
Pak26_A1_TS4	Pak26	A1	4	PaKiT01	EBOV	0.001	36	2016-08-28 05:30:00	2016-08-29 00:14:00	3117	18.7333	Pak26_A1	0.0337948
Pak26_A2_TS4	Pak26	A2	4	PaKiT01	EBOV	0.0001	36	2016-08-28 05:30:00	2016-08-29 00:15:00	830	18.75	Pak26_A2	0.00899895
Pak26_A3_TS4	Pak26	A3	4	PaKiT01	EBOV	0.0001	36	2016-08-28 05:30:00	2016-08-29 00:16:00	864	18.7667	Pak26_A3	0.00936758
Pak26_B2_TS4	Pak26	B2	4	PaKiT01	EBOV	0.0001	36	2016-08-28 05:30:00	2016-08-29 00:20:00	830	18.8333	Pak26_B2	0.00899895
Pak26_B1_TS4	Pak26	B1	4	PaKiT01	EBOV	0.001	36	2016-08-28 05:30:00	2016-08-29 00:21:00	3056	18.85	Pak26_B1	0.0331335
Pak26_A1_TS5	Pak26	A1	5	PaKiT01	EBOV	0.001	36	2016-08-28 05:30:00	2016-08-29 11:05:00	4848	29.5833	Pak26_A1	0.0525625
Pak26_A2_TS5	Pak26	A2	5	PaKiT01	EBOV	0.0001	36	2016-08-28 05:30:00	2016-08-29 11:07:00	1767	29.6167	Pak26_A2	0.019158
Pak26_A3_TS5	Pak26	A3	5	PaKiT01	EBOV	0.0001	36	2016-08-28 05:30:00	2016-08-29 11:09:00	1475	29.65	Pak26_A3	0.0159921
Pak26_B2_TS5	Pak26	B2	5	PaKiT01	EBOV	0.0001	36	2016-08-28 05:30:00	2016-08-29 11:16:00	2120	29.7667	Pak26_B2	0.0229853
Pak26_B1_TS5	Pak26	B1	5	PaKiT01	EBOV	0.001	36	2016-08-28 05:30:00	2016-08-29 11:18:00	5045	29.8	Pak26_B1	0.0546984
Pak26_A1_TS6	Pak26	A1	6	PaKiT01	EBOV	0.001	36	2016-08-28 05:30:00	2016-08-29 21:48:00	5263	40.3	Pak26_A1	0.057062
Pak26_A2_TS6	Pak26	A2	6	PaKiT01	EBOV	0.0001	36	2016-08-28 05:30:00	2016-08-29 21:49:00	4135	40.3167	Pak26_A2	0.0448321
Pak26_A3_TS6	Pak26	A3	6	PaKiT01	EBOV	0.0001	36	2016-08-28 05:30:00	2016-08-29 21:49:00	1913	40.3167	Pak26_A3	0.0207409
Pak26_B2_TS6	Pak26	B2	6	PaKiT01	EBOV	0.0001	36	2016-08-28 05:30:00	2016-08-29 21:53:00	3939	40.3833	Pak26_B2	0.0427071
Pak26_B1_TS6	Pak26	B1	6	PaKiT01	EBOV	0.001	36	2016-08-28 05:30:00	2016-08-29 21:54:00	6927	40.4	Pak26_B1	0.0751033
Pak26_A1_TS7	Pak26	A1	7	PaKiT01	EBOV	0.001	36	2016-08-28 05:30:00	2016-08-30 08:27:00	5175	50.95	Pak26_A1	0.0561079
Pak26_A2_TS7	Pak26	A2	7	PaKiT01	EBOV	0.0001	36	2016-08-28 05:30:00	2016-08-30 08:28:00	3154	50.9667	Pak26_A2	0.034196
Pak26_A3_TS7	Pak26	A3	7	PaKiT01	EBOV	0.0001	36	2016-08-28 05:30:00	2016-08-30 08:29:00	2289	50.9833	Pak26_A3	0.0248176
Pak26_B2_TS7	Pak26	B2	7	PaKiT01	EBOV	0.0001	36	2016-08-28 05:30:00	2016-08-30 08:33:00	3384	51.05	Pak26_B2	0.0366897
Pak26_B1_TS7	Pak26	B1	7	PaKiT01	EBOV	0.001	36	2016-08-28 05:30:00	2016-08-30 08:36:00	4498	51.1	Pak26_B1	0.0487678
Pak26_A1_TS8	Pak26	A1	8	PaKiT01	EBOV	0.001	36	2016-08-28 05:30:00	2016-08-30 21:42:00	3646	64.2	Pak26_A1	0.0395303
Pak26_A2_TS8	Pak26	A2	8	PaKiT01	EBOV	0.0001	36	2016-08-28 05:30:00	2016-08-30 21:44:00	1264	64.2333	Pak26_A2	0.0137044
Pak26_A3_TS8	Pak26	A3	8	PaKiT01	EBOV	0.0001	36	2016-08-28 05:30:00	2016-08-30 21:46:00	2468	64.2667	Pak26_A3	0.0267583
Pak26_B2_TS8	Pak26	B2	8	PaKiT01	EBOV	0.0001	36	2016-08-28 05:30:00	2016-08-30 21:50:00	1433	64.3333	Pak26_B2	0.0155367
Pak26_B1_TS8	Pak26	B1	8	PaKiT01	EBOV	0.001	36	2016-08-28 05:30:00	2016-08-30 21:52:00	2218	64.3667	Pak26_B1	0.0240478
Pak26_A1_TS9	Pak26	A1	9	PaKiT01	EBOV	0.001	36	2016-08-28 05:30:00	2016-08-31 09:34:00	1944	76.0667	Pak26_A1	0.0210771
Pak26_A2_TS9	Pak26	A2	9	PaKiT01	EBOV	0.0001	36	2016-08-28 05:30:00	2016-08-31 09:35:00	647	76.0833	Pak26_A2	0.00701484
Pak26_A3_TS9	Pak26	A3	9	PaKiT01	EBOV	0.0001	36	2016-08-28 05:30:00	2016-08-31 09:36:00	927	76.1	Pak26_A3	0.0100506
Pak26_B2_TS9	Pak26	B2	9	PaKiT01	EBOV	0.0001	36	2016-08-28 05:30:00	2016-08-31 09:40:00	506	76.1667	Pak26_B2	0.00548611
Pak26_B1_TS9	Pak26	B1	9	PaKiT01	EBOV	0.001	36	2016-08-28 05:30:00	2016-08-31 09:42:00	831	76.2	Pak26_B1	0.00900979
Pak26_A1_TS10	Pak26	A1	10	PaKiT01	EBOV	0.001	36	2016-08-28 05:30:00	2016-08-31 18:46:00	1436	85.2667	Pak26_A1	0.0155693
Pak26_A2_TS10	Pak26	A2	10	PaKiT01	EBOV	0.0001	36	2016-08-28 05:30:00	2016-08-31 18:47:00	735	85.2833	Pak26_A2	0.00796895
Pak26_A3_TS10	Pak26	A3	10	PaKiT01	EBOV	0.0001	36	2016-08-28 05:30:00	2016-08-31 18:49:00	405	85.3167	Pak26_A3	0.00439105
Pak26_B2_TS10	Pak26	B2	10	PaKiT01	EBOV	0.0001	36	2016-08-28 05:30:00	2016-08-31 18:55:00	406	85.4167	Pak26_B2	0.0044019
Pak26_B1_TS10	Pak26	B1	10	PaKiT01	EBOV	0.001	36	2016-08-28 05:30:00	2016-08-31 18:57:00	619	85.45	Pak26_B1	0.00671126
Pak26_A1_TS11	Pak26	A1	11	PaKiT01	EBOV	0.001	36	2016-08-28 05:30:00	2016-09-01 10:14:00	973	100.733	Pak26_A1	0.0105494
Pak26_A2_TS11	Pak26	A2	11	PaKiT01	EBOV	0.0001	36	2016-08-28 05:30:00	2016-09-01 10:16:00	578	100.767	Pak26_A2	0.00626674
Pak26_A3_TS11	Pak26	A3	11	PaKiT01	EBOV	0.0001	36	2016-08-28 05:30:00	2016-09-01 10:19:00	319	100.817	Pak26_A3	0.00345863
Pak26_B2_TS11	Pak26	B2	11	PaKiT01	EBOV	0.0001	36	2016-08-28 05:30:00	2016-09-01 10:22:00	294	100.867	Pak26_B2	0.00318758
Pak26_B1_TS11	Pak26	B1	11	PaKiT01	EBOV	0.001	36	2016-08-28 05:30:00	2016-09-01 10:23:00	494	100.883	Pak26_B1	0.005356
Pak26_A1_TS12	Pak26	A1	12	PaKiT01	EBOV	0.001	36	2016-08-28 05:30:00	2016-09-01 19:39:00	784	110.15	Pak26_A1	0.00850021
Pak26_A2_TS12	Pak26	A2	12	PaKiT01	EBOV	0.0001	36	2016-08-28 05:30:00	2016-09-01 19:42:00	694	110.2	Pak26_A2	0.00752442
Pak26_A3_TS12	Pak26	A3	12	PaKiT01	EBOV	0.0001	36	2016-08-28 05:30:00	2016-09-01 19:45:00	295	110.25	Pak26_A3	0.00319842
Pak26_B2_TS12	Pak26	B2	12	PaKiT01	EBOV	0.0001	36	2016-08-28 05:30:00	2016-09-01 19:50:00	775	110.333	Pak26_B2	0.00840263
Pak26_B1_TS12	Pak26	B1	12	PaKiT01	EBOV	0.001	36	2016-08-28 05:30:00	2016-09-01 19:51:00	646	110.35	Pak26_B1	0.007004
Pak27_A1_TS1	Pak27	A1	1	PaKiT01	VSVG	0.001	36	2016-08-30 05:25:00	2016-08-30 12:31:00	0	7.1	Pak27_A1	0
Pak27_A2_TS1	Pak27	A2	1	PaKiT01	VSVG	0.0001	36	2016-08-30 05:25:00	2016-08-30 12:35:00	20	7.16667	Pak27_A2	0.000216842
Pak27_A3_TS1	Pak27	A3	1	PaKiT01	VSVG	0.001	36	2016-08-30 05:25:00	2016-08-30 12:36:00	139	7.18333	Pak27_A3	0.00150705
Pak27_B2_TS1	Pak27	B2	1	PaKiT01	VSVG	0.0001	36	2016-08-30 05:25:00	2016-08-30 12:39:00	0	7.23333	Pak27_B2	0
Pak27_B1_TS1	Pak27	B1	1	PaKiT01	VSVG	0.001	36	2016-08-30 05:25:00	2016-08-30 12:42:00	32	7.28333	Pak27_B1	0.000346947
Pak27_A1_TS2	Pak27	A1	2	PaKiT01	VSVG	0.001	36	2016-08-30 05:25:00	2016-08-30 16:12:00	1412	10.7833	Pak27_A1	0.0153091
Pak27_A2_TS2	Pak27	A2	2	PaKiT01	VSVG	0.0001	36	2016-08-30 05:25:00	2016-08-30 16:14:00	323	10.8167	Pak27_A2	0.003502
Pak27_A3_TS2	Pak27	A3	2	PaKiT01	VSVG	0.001	36	2016-08-30 05:25:00	2016-08-30 16:15:00	1807	10.8333	Pak27_A3	0.0195917
Pak27_B2_TS2	Pak27	B2	2	PaKiT01	VSVG	0.0001	36	2016-08-30 05:25:00	2016-08-30 16:17:00	264	10.8667	Pak27_B2	0.00286232
Pak27_B1_TS2	Pak27	B1	2	PaKiT01	VSVG	0.001	36	2016-08-30 05:25:00	2016-08-30 16:18:00	1734	10.8833	Pak27_B1	0.0188002
Pak27_A1_TS3	Pak27	A1	3	PaKiT01	VSVG	0.001	36	2016-08-30 05:25:00	2016-08-30 18:45:00	2268	13.3333	Pak27_A1	0.0245899
Pak27_A2_TS3	Pak27	A2	3	PaKiT01	VSVG	0.0001	36	2016-08-30 05:25:00	2016-08-30 18:47:00	745	13.3667	Pak27_A2	0.00807737
Pak27_A3_TS3	Pak27	A3	3	PaKiT01	VSVG	0.001	36	2016-08-30 05:25:00	2016-08-30 18:48:00	2557	13.3833	Pak27_A3	0.0277233
Pak27_B2_TS3	Pak27	B2	3	PaKiT01	VSVG	0.0001	36	2016-08-30 05:25:00	2016-08-30 18:51:00	610	13.4333	Pak27_B2	0.00661368
Pak27_B1_TS3	Pak27	B1	3	PaKiT01	VSVG	0.001	36	2016-08-30 05:25:00	2016-08-30 18:52:00	2659	13.45	Pak27_B1	0.0288292
Pak28_A1_TS1	Pak28	A1	1	PaKiT01	VSVG	0.001	36	2016-08-30 05:25:00	2016-08-30 12:53:00	0	7.46667	Pak28_A1	0
Pak28_A2_TS1	Pak28	A2	1	PaKiT01	VSVG	0.0001	36	2016-08-30 05:25:00	2016-08-30 12:56:00	0	7.51667	Pak28_A2	0
Pak28_A3_TS1	Pak28	A3	1	PaKiT01	VSVG	0.001	36	2016-08-30 05:25:00	2016-08-30 12:58:00	0	7.55	Pak28_A3	0
Pak28_B2_TS1	Pak28	B2	1	PaKiT01	VSVG	0.0001	36	2016-08-30 05:25:00	2016-08-30 13:05:00	26	7.66667	Pak28_B2	0.000281895
Pak28_B1_TS1	Pak28	B1	1	PaKiT01	VSVG	0.001	36	2016-08-30 05:25:00	2016-08-30 13:08:00	0	7.71667	Pak28_B1	0
Pak28_A1_TS2	Pak28	A1	2	PaKiT01	VSVG	0.001	36	2016-08-30 05:25:00	2016-08-30 16:27:00	952	11.0333	Pak28_A1	0.0103217
Pak28_A2_TS2	Pak28	A2	2	PaKiT01	VSVG	0.0001	36	2016-08-30 05:25:00	2016-08-30 16:28:00	226	11.05	Pak28_A2	0.00245032
Pak28_A3_TS2	Pak28	A3	2	PaKiT01	VSVG	0.001	36	2016-08-30 05:25:00	2016-08-30 16:29:00	898	11.0667	Pak28_A3	0.00973621
Pak28_B2_TS2	Pak28	B2	2	PaKiT01	VSVG	0.0001	36	2016-08-30 05:25:00	2016-08-30 16:31:00	306	11.1	Pak28_B2	0.00331768
Pak28_B1_TS2	Pak28	B1	2	PaKiT01	VSVG	0.001	36	2016-08-30 05:25:00	2016-08-30 16:32:00	724	11.1167	Pak28_B1	0.00784969
Pak28_A1_TS3	Pak28	A1	3	PaKiT01	VSVG	0.001	36	2016-08-30 05:25:00	2016-08-30 18:56:00	1707	13.5167	Pak28_A1	0.0185075
Pak28_A2_TS3	Pak28	A2	3	PaKiT01	VSVG	0.0001	36	2016-08-30 05:25:00	2016-08-30 18:57:00	622	13.5333	Pak28_A2	0.00674379
Pak28_A3_TS3	Pak28	A3	3	PaKiT01	VSVG	0.001	36	2016-08-30 05:25:00	2016-08-30 18:59:00	1890	13.5667	Pak28_A3	0.0204916
Pak28_B2_TS3	Pak28	B2	3	PaKiT01	VSVG	0.0001	36	2016-08-30 05:25:00	2016-08-30 19:04:00	619	13.65	Pak28_B2	0.00671126
Pak28_B1_TS3	Pak28	B1	3	PaKiT01	VSVG	0.001	36	2016-08-30 05:25:00	2016-08-30 19:04:00	1380	13.65	Pak28_B1	0.0149621
Pak28_A1_TS4	Pak28	A1	4	PaKiT01	VSVG	0.001	36	2016-08-30 05:25:00	2016-08-30 20:12:00	2191	14.7833	Pak28_A1	0.0237551
Pak28_A2_TS4	Pak28	A2	4	PaKiT01	VSVG	0.0001	36	2016-08-30 05:25:00	2016-08-30 20:13:00	919	14.8	Pak28_A2	0.0099639
Pak28_A3_TS4	Pak28	A3	4	PaKiT01	VSVG	0.001	36	2016-08-30 05:25:00	2016-08-30 20:14:00	2526	14.8167	Pak28_A3	0.0273872
Pak28_B2_TS4	Pak28	B2	4	PaKiT01	VSVG	0.0001	36	2016-08-30 05:25:00	2016-08-30 20:19:00	815	14.9	Pak28_B2	0.00883632
Pak28_B1_TS4	Pak28	B1	4	PaKiT01	VSVG	0.001	36	2016-08-30 05:25:00	2016-08-30 20:20:00	1809	14.9167	Pak28_B1	0.0196134
Pak28_A1_TS5	Pak28	A1	5	PaKiT01	VSVG	0.001	36	2016-08-30 05:25:00	2016-08-31 07:53:00	13648	26.4667	Pak28_A1	0.147973
Pak28_A2_TS5	Pak28	A2	5	PaKiT01	VSVG	0.0001	36	2016-08-30 05:25:00	2016-08-31 07:54:00	10686	26.4833	Pak28_A2	0.115859
Pak28_A3_TS5	Pak28	A3	5	PaKiT01	VSVG	0.001	36	2016-08-30 05:25:00	2016-08-31 07:56:00	14709	26.5167	Pak28_A3	0.159477
Pak28_B2_TS5	Pak28	B2	5	PaKiT01	VSVG	0.0001	36	2016-08-30 05:25:00	2016-08-31 08:00:00	8484	26.5833	Pak28_B2	0.0919844
Pak28_B1_TS5	Pak28	B1	5	PaKiT01	VSVG	0.001	36	2016-08-30 05:25:00	2016-08-31 08:01:00	10038	26.6	Pak28_B1	0.108833
Pak28_A1_TS6	Pak28	A1	6	PaKiT01	VSVG	0.001	36	2016-08-30 05:25:00	2016-08-31 18:05:00	4632	36.6667	Pak28_A1	0.0502206
Pak28_A2_TS6	Pak28	A2	6	PaKiT01	VSVG	0.0001	36	2016-08-30 05:25:00	2016-08-31 18:07:00	4847	36.7	Pak28_A2	0.0525517
Pak28_A3_TS6	Pak28	A3	6	PaKiT01	VSVG	0.001	36	2016-08-30 05:25:00	2016-08-31 18:08:00	4620	36.7167	Pak28_A3	0.0500905
Pak28_B2_TS6	Pak28	B2	6	PaKiT01	VSVG	0.0001	36	2016-08-30 05:25:00	2016-08-31 18:14:00	5452	36.8167	Pak28_B2	0.0591112
Pak28_B1_TS6	Pak28	B1	6	PaKiT01	VSVG	0.001	36	2016-08-30 05:25:00	2016-08-31 18:16:00	6069	36.85	Pak28_B1	0.0658007
Pak28_A1_TS7	Pak28	A1	7	PaKiT01	VSVG	0.001	36	2016-08-30 05:25:00	2016-09-01 09:44:00	616	52.3167	Pak28_A1	0.00667874
Pak28_A2_TS7	Pak28	A2	7	PaKiT01	VSVG	0.0001	36	2016-08-30 05:25:00	2016-09-01 09:45:00	682	52.3333	Pak28_A2	0.00739432
Pak28_A3_TS7	Pak28	A3	7	PaKiT01	VSVG	0.001	36	2016-08-30 05:25:00	2016-09-01 09:45:00	336	52.3333	Pak28_A3	0.00364295
Pak28_B2_TS7	Pak28	B2	7	PaKiT01	VSVG	0.0001	36	2016-08-30 05:25:00	2016-09-01 09:49:00	1002	52.4	Pak28_B2	0.0108638
Pak28_B1_TS7	Pak28	B1	7	PaKiT01	VSVG	0.001	36	2016-08-30 05:25:00	2016-09-01 09:50:00	1024	52.4167	Pak28_B1	0.0111023
Pak29_A1_TS1	Pak29	A1	1	PaKiT01	VSVG	0.001	36	2016-08-30 05:25:00	2016-08-30 14:36:00	661	9.18333	Pak29_A1	0.00716663
Pak29_A2_TS1	Pak29	A2	1	PaKiT01	VSVG	0.0001	36	2016-08-30 05:25:00	2016-08-30 14:39:00	19	9.23333	Pak29_A2	0.000206
Pak29_A3_TS1	Pak29	A3	1	PaKiT01	VSVG	0.0001	36	2016-08-30 05:25:00	2016-08-30 14:43:00	87	9.3	Pak29_A3	0.000943263
Pak29_B2_TS1	Pak29	B2	1	PaKiT01	VSVG	0.0001	36	2016-08-30 05:25:00	2016-08-30 14:49:00	22	9.4	Pak29_B2	0.000238526
Pak29_B1_TS1	Pak29	B1	1	PaKiT01	VSVG	0.001	36	2016-08-30 05:25:00	2016-08-30 14:50:00	957	9.41667	Pak29_B1	0.0103759
Pak29_A1_TS2	Pak29	A1	2	PaKiT01	VSVG	0.001	36	2016-08-30 05:25:00	2016-08-30 17:45:00	1706	12.3333	Pak29_A1	0.0184966
Pak29_A2_TS2	Pak29	A2	2	PaKiT01	VSVG	0.0001	36	2016-08-30 05:25:00	2016-08-30 17:46:00	294	12.35	Pak29_A2	0.00318758
Pak29_A3_TS2	Pak29	A3	2	PaKiT01	VSVG	0.0001	36	2016-08-30 05:25:00	2016-08-30 17:47:00	335	12.3667	Pak29_A3	0.00363211
Pak29_B2_TS2	Pak29	B2	2	PaKiT01	VSVG	0.0001	36	2016-08-30 05:25:00	2016-08-30 17:52:00	370	12.45	Pak29_B2	0.00401158
Pak29_B1_TS2	Pak29	B1	2	PaKiT01	VSVG	0.001	36	2016-08-30 05:25:00	2016-08-30 17:53:00	2127	12.4667	Pak29_B1	0.0230612
Pak29_A1_TS3	Pak29	A1	3	PaKiT01	VSVG	0.001	36	2016-08-30 05:25:00	2016-08-30 20:28:00	2599	15.05	Pak29_A1	0.0281786
Pak29_A2_TS3	Pak29	A2	3	PaKiT01	VSVG	0.0001	36	2016-08-30 05:25:00	2016-08-30 20:29:00	862	15.0667	Pak29_A2	0.0093459
Pak29_A3_TS3	Pak29	A3	3	PaKiT01	VSVG	0.0001	36	2016-08-30 05:25:00	2016-08-30 20:30:00	843	15.0833	Pak29_A3	0.0091399
Pak29_B2_TS3	Pak29	B2	3	PaKiT01	VSVG	0.0001	36	2016-08-30 05:25:00	2016-08-30 20:34:00	1089	15.15	Pak29_B2	0.0118071
Pak29_B1_TS3	Pak29	B1	3	PaKiT01	VSVG	0.001	36	2016-08-30 05:25:00	2016-08-30 20:35:00	3453	15.1667	Pak29_B1	0.0374378
Pak29_A1_TS4	Pak29	A1	4	PaKiT01	VSVG	0.001	36	2016-08-30 05:25:00	2016-08-31 08:35:00	15222	27.1667	Pak29_A1	0.165039
Pak29_A2_TS4	Pak29	A2	4	PaKiT01	VSVG	0.0001	36	2016-08-30 05:25:00	2016-08-31 08:36:00	11925	27.1833	Pak29_A2	0.129292
Pak29_A3_TS4	Pak29	A3	4	PaKiT01	VSVG	0.0001	36	2016-08-30 05:25:00	2016-08-31 08:37:00	10319	27.2	Pak29_A3	0.11188
Pak29_B2_TS4	Pak29	B2	4	PaKiT01	VSVG	0.0001	36	2016-08-30 05:25:00	2016-08-31 08:41:00	13525	27.2667	Pak29_B2	0.146639
Pak29_B1_TS4	Pak29	B1	4	PaKiT01	VSVG	0.001	36	2016-08-30 05:25:00	2016-08-31 08:42:00	17271	27.2833	Pak29_B1	0.187254
Pak29_A1_TS5	Pak29	A1	5	PaKiT01	VSVG	0.001	36	2016-08-30 05:25:00	2016-08-31 17:32:00	10041	36.1167	Pak29_A1	0.108866
Pak29_A2_TS5	Pak29	A2	5	PaKiT01	VSVG	0.0001	36	2016-08-30 05:25:00	2016-08-31 17:33:00	11833	36.1333	Pak29_A2	0.128295
Pak29_A3_TS5	Pak29	A3	5	PaKiT01	VSVG	0.0001	36	2016-08-30 05:25:00	2016-08-31 17:34:00	12537	36.15	Pak29_A3	0.135927
Pak29_B2_TS5	Pak29	B2	5	PaKiT01	VSVG	0.0001	36	2016-08-30 05:25:00	2016-08-31 17:38:00	11072	36.2167	Pak29_B2	0.120044
Pak29_B1_TS5	Pak29	B1	5	PaKiT01	VSVG	0.001	36	2016-08-30 05:25:00	2016-08-31 17:39:00	9267	36.2333	Pak29_B1	0.100474
Pak3_A1_TS1	Pak3	A1	1	PaKiT01	EBOV	0.0001	64	2016-07-24 20:55:00	2016-07-25 06:15:00	398	9.33333	Pak3_A1	0.00431516
Pak3_A3_TS1	Pak3	A3	1	PaKiT01	EBOV	0.001	64	2016-07-24 20:55:00	2016-07-25 06:35:00	1575	9.66667	Pak3_A3	0.0170763
Pak3_B1_TS1	Pak3	B1	1	PaKiT01	EBOV	0.0001	64	2016-07-24 20:55:00	2016-07-25 06:50:00	610	9.91667	Pak3_B1	0.00661368
Pak3_A1_TS2	Pak3	A1	2	PaKiT01	EBOV	0.0001	64	2016-07-24 20:55:00	2016-07-25 10:14:00	966	13.3167	Pak3_A1	0.0104735
Pak3_A3_TS2	Pak3	A3	2	PaKiT01	EBOV	0.001	64	2016-07-24 20:55:00	2016-07-25 10:21:00	3049	13.4333	Pak3_A3	0.0330576
Pak3_B1_TS2	Pak3	B1	2	PaKiT01	EBOV	0.0001	64	2016-07-24 20:55:00	2016-07-25 10:33:00	1040	13.6333	Pak3_B1	0.0112758
Pak3_A1_TS3	Pak3	A1	3	PaKiT01	EBOV	0.0001	64	2016-07-24 20:55:00	2016-07-25 13:32:00	1282	16.6167	Pak3_A1	0.0138996
Pak3_A3_TS3	Pak3	A3	3	PaKiT01	EBOV	0.001	64	2016-07-24 20:55:00	2016-07-25 13:40:00	3784	16.75	Pak3_A3	0.0410265
Pak3_B1_TS3	Pak3	B1	3	PaKiT01	EBOV	0.0001	64	2016-07-24 20:55:00	2016-07-25 13:51:00	1088	16.9333	Pak3_B1	0.0117962
Pak3_A1_TS4	Pak3	A1	4	PaKiT01	EBOV	0.0001	64	2016-07-24 20:55:00	2016-07-25 18:40:00	670	21.75	Pak3_A1	0.00726421
Pak3_A3_TS4	Pak3	A3	4	PaKiT01	EBOV	0.001	64	2016-07-24 20:55:00	2016-07-25 18:44:00	2096	21.8167	Pak3_A3	0.0227251
Pak3_B1_TS4	Pak3	B1	4	PaKiT01	EBOV	0.0001	64	2016-07-24 20:55:00	2016-07-25 19:10:00	548	22.25	Pak3_B1	0.00594147
Pak3_A1_TS5	Pak3	A1	5	PaKiT01	EBOV	0.0001	64	2016-07-24 20:55:00	2016-07-26 09:06:00	724	36.1833	Pak3_A1	0.00784969
Pak3_A3_TS5	Pak3	A3	5	PaKiT01	EBOV	0.001	64	2016-07-24 20:55:00	2016-07-26 09:13:00	2224	36.3	Pak3_A3	0.0241128
Pak3_B1_TS5	Pak3	B1	5	PaKiT01	EBOV	0.0001	64	2016-07-24 20:55:00	2016-07-26 09:25:00	712	36.5	Pak3_B1	0.00771958
Pak3_A1_TS6	Pak3	A1	6	PaKiT01	EBOV	0.0001	64	2016-07-24 20:55:00	2016-07-26 18:42:00	3466	45.7833	Pak3_A1	0.0375787
Pak3_A3_TS6	Pak3	A3	6	PaKiT01	EBOV	0.001	64	2016-07-24 20:55:00	2016-07-26 18:46:00	8135	45.85	Pak3_A3	0.0882005
Pak3_B1_TS6	Pak3	B1	6	PaKiT01	EBOV	0.0001	64	2016-07-24 20:55:00	2016-07-26 18:56:00	3428	46.0167	Pak3_B1	0.0371667
Pak3_A1_TS7	Pak3	A1	7	PaKiT01	EBOV	0.0001	64	2016-07-24 20:55:00	2016-07-27 08:22:00	3380	59.45	Pak3_A1	0.0366463
Pak3_A3_TS7	Pak3	A3	7	PaKiT01	EBOV	0.001	64	2016-07-24 20:55:00	2016-07-27 08:22:00	7565	59.45	Pak3_A3	0.0820205
Pak3_B1_TS7	Pak3	B1	7	PaKiT01	EBOV	0.0001	64	2016-07-24 20:55:00	2016-07-27 08:33:00	3566	59.6333	Pak3_B1	0.038663
Pak3_A1_TS8	Pak3	A1	8	PaKiT01	EBOV	0.0001	64	2016-07-24 20:55:00	2016-07-27 18:09:00	4896	69.2333	Pak3_A1	0.053083
Pak3_A3_TS8	Pak3	A3	8	PaKiT01	EBOV	0.001	64	2016-07-24 20:55:00	2016-07-27 18:12:00	6965	69.2833	Pak3_A3	0.0755153
Pak3_B1_TS8	Pak3	B1	8	PaKiT01	EBOV	0.0001	64	2016-07-24 20:55:00	2016-07-27 18:21:00	4869	69.4333	Pak3_B1	0.0527902
Pak3_A1_TS9	Pak3	A1	9	PaKiT01	EBOV	0.0001	64	2016-07-24 20:55:00	2016-07-28 08:05:00	4796	83.1667	Pak3_A1	0.0519987
Pak3_A3_TS9	Pak3	A3	9	PaKiT01	EBOV	0.001	64	2016-07-24 20:55:00	2016-07-28 08:10:00	7610	83.25	Pak3_A3	0.0825084
Pak3_B1_TS9	Pak3	B1	9	PaKiT01	EBOV	0.0001	64	2016-07-24 20:55:00	2016-07-28 08:17:00	5450	83.3667	Pak3_B1	0.0590895
Pak3_A1_TS10	Pak3	A1	10	PaKiT01	EBOV	0.0001	64	2016-07-24 20:55:00	2016-07-28 19:45:00	5493	94.8333	Pak3_A1	0.0595557
Pak3_A3_TS10	Pak3	A3	10	PaKiT01	EBOV	0.001	64	2016-07-24 20:55:00	2016-07-28 19:48:00	8442	94.8833	Pak3_A3	0.0915291
Pak3_B1_TS10	Pak3	B1	10	PaKiT01	EBOV	0.0001	64	2016-07-24 20:55:00	2016-07-28 19:52:00	6806	94.95	Pak3_B1	0.0737914
Pak3_A1_TS11	Pak3	A1	11	PaKiT01	EBOV	0.0001	64	2016-07-24 20:55:00	2016-07-29 08:05:00	5125	107.167	Pak3_A1	0.0555658
Pak3_A3_TS11	Pak3	A3	11	PaKiT01	EBOV	0.001	64	2016-07-24 20:55:00	2016-07-29 08:10:00	8120	107.25	Pak3_A3	0.0880379
Pak3_B1_TS11	Pak3	B1	11	PaKiT01	EBOV	0.0001	64	2016-07-24 20:55:00	2016-07-29 08:17:00	6183	107.367	Pak3_B1	0.0670367
Pak3_A1_TS12	Pak3	A1	12	PaKiT01	EBOV	0.0001	64	2016-07-24 20:55:00	2016-07-29 18:51:00	5137	117.933	Pak3_A1	0.0556959
Pak3_A3_TS12	Pak3	A3	12	PaKiT01	EBOV	0.001	64	2016-07-24 20:55:00	2016-07-29 18:56:00	6872	118.017	Pak3_A3	0.074507
Pak3_B1_TS12	Pak3	B1	12	PaKiT01	EBOV	0.0001	64	2016-07-24 20:55:00	2016-07-29 19:02:00	5598	118.117	Pak3_B1	0.0606941
Pak3_A1_TS13	Pak3	A1	13	PaKiT01	EBOV	0.0001	64	2016-07-24 20:55:00	2016-07-30 10:52:00	5539	133.95	Pak3_A1	0.0600544
Pak3_A3_TS13	Pak3	A3	13	PaKiT01	EBOV	0.001	64	2016-07-24 20:55:00	2016-07-30 10:58:00	6192	134.05	Pak3_A3	0.0671343
Pak3_B1_TS13	Pak3	B1	13	PaKiT01	EBOV	0.0001	64	2016-07-24 20:55:00	2016-07-30 11:07:00	5493	134.2	Pak3_B1	0.0595557
Pak3_A1_TS14	Pak3	A1	14	PaKiT01	EBOV	0.0001	64	2016-07-24 20:55:00	2016-07-30 18:54:00	5480	141.983	Pak3_A1	0.0594147
Pak3_A3_TS14	Pak3	A3	14	PaKiT01	EBOV	0.001	64	2016-07-24 20:55:00	2016-07-30 18:57:00	5998	142.033	Pak3_A3	0.065031
Pak3_B1_TS14	Pak3	B1	14	PaKiT01	EBOV	0.0001	64	2016-07-24 20:55:00	2016-07-30 19:05:00	5472	142.167	Pak3_B1	0.059328
Pak3_A1_TS15	Pak3	A1	15	PaKiT01	EBOV	0.0001	64	2016-07-24 20:55:00	2016-07-31 13:48:00	5062	160.883	Pak3_A1	0.0548827
Pak3_A3_TS15	Pak3	A3	15	PaKiT01	EBOV	0.001	64	2016-07-24 20:55:00	2016-07-31 13:52:00	5458	160.95	Pak3_A3	0.0591762
Pak3_B1_TS15	Pak3	B1	15	PaKiT01	EBOV	0.0001	64	2016-07-24 20:55:00	2016-07-31 14:01:00	5325	161.1	Pak3_B1	0.0577342
Pak3_A1_TS16	Pak3	A1	16	PaKiT01	EBOV	0.0001	64	2016-07-24 20:55:00	2016-08-01 08:11:00	4484	179.267	Pak3_A1	0.048616
Pak3_A3_TS16	Pak3	A3	16	PaKiT01	EBOV	0.001	64	2016-07-24 20:55:00	2016-08-01 08:15:00	4577	179.333	Pak3_A3	0.0496243
Pak3_B1_TS16	Pak3	B1	16	PaKiT01	EBOV	0.0001	64	2016-07-24 20:55:00	2016-08-01 08:23:00	4638	179.467	Pak3_B1	0.0502857
Pak3_A1_TS17	Pak3	A1	17	PaKiT01	EBOV	0.0001	64	2016-07-24 20:55:00	2016-08-01 17:40:00	3986	188.75	Pak3_A1	0.0432166
Pak3_A3_TS17	Pak3	A3	17	PaKiT01	EBOV	0.001	64	2016-07-24 20:55:00	2016-08-01 17:49:00	3898	188.9	Pak3_A3	0.0422625
Pak3_B1_TS17	Pak3	B1	17	PaKiT01	EBOV	0.0001	64	2016-07-24 20:55:00	2016-08-01 17:56:00	4301	189.017	Pak3_B1	0.0466319
Pak3_A1_TS18	Pak3	A1	18	PaKiT01	EBOV	0.0001	64	2016-07-24 20:55:00	2016-08-02 08:15:00	3450	203.333	Pak3_A1	0.0374053
Pak3_A3_TS18	Pak3	A3	18	PaKiT01	EBOV	0.001	64	2016-07-24 20:55:00	2016-08-02 08:20:00	3164	203.417	Pak3_A3	0.0343044
Pak3_B1_TS18	Pak3	B1	18	PaKiT01	EBOV	0.0001	64	2016-07-24 20:55:00	2016-08-02 08:29:00	3673	203.567	Pak3_B1	0.0398231
Pak3_A1_TS19	Pak3	A1	19	PaKiT01	EBOV	0.0001	64	2016-07-24 20:55:00	2016-08-02 18:19:00	3119	213.4	Pak3_A1	0.0338165
Pak3_A3_TS19	Pak3	A3	19	PaKiT01	EBOV	0.001	64	2016-07-24 20:55:00	2016-08-02 18:28:00	2804	213.55	Pak3_A3	0.0304013
Pak3_B1_TS19	Pak3	B1	19	PaKiT01	EBOV	0.0001	64	2016-07-24 20:55:00	2016-08-02 18:38:00	3265	213.717	Pak3_B1	0.0353995
Pak30_A1_TS1	Pak30	A1	1	PaKiT01	VSVG	0.001	36	2016-08-30 05:25:00	2016-08-30 14:57:00	675	9.53333	Pak30_A1	0.00731842
Pak30_A2_TS1	Pak30	A2	1	PaKiT01	VSVG	0.0001	36	2016-08-30 05:25:00	2016-08-30 14:59:00	38	9.56667	Pak30_A2	0.000412
Pak30_A3_TS1	Pak30	A3	1	PaKiT01	VSVG	0.0001	36	2016-08-30 05:25:00	2016-08-30 15:02:00	120	9.61667	Pak30_A3	0.00130105
Pak30_B2_TS1	Pak30	B2	1	PaKiT01	VSVG	0.0001	36	2016-08-30 05:25:00	2016-08-30 15:10:00	192	9.75	Pak30_B2	0.00208168
Pak30_B1_TS1	Pak30	B1	1	PaKiT01	VSVG	0.001	36	2016-08-30 05:25:00	2016-08-30 15:11:00	649	9.76667	Pak30_B1	0.00703653
Pak30_A1_TS2	Pak30	A1	2	PaKiT01	VSVG	0.001	36	2016-08-30 05:25:00	2016-08-30 17:58:00	1800	12.55	Pak30_A1	0.0195158
Pak30_A2_TS2	Pak30	A2	2	PaKiT01	VSVG	0.0001	36	2016-08-30 05:25:00	2016-08-30 17:59:00	302	12.5667	Pak30_A2	0.00327432
Pak30_A3_TS2	Pak30	A3	2	PaKiT01	VSVG	0.0001	36	2016-08-30 05:25:00	2016-08-30 18:01:00	552	12.6	Pak30_A3	0.00598484
Pak30_B2_TS2	Pak30	B2	2	PaKiT01	VSVG	0.0001	36	2016-08-30 05:25:00	2016-08-30 18:07:00	363	12.7	Pak30_B2	0.00393568
Pak30_B1_TS2	Pak30	B1	2	PaKiT01	VSVG	0.001	36	2016-08-30 05:25:00	2016-08-30 18:08:00	1388	12.7167	Pak30_B1	0.0150488
Pak30_A1_TS3	Pak30	A1	3	PaKiT01	VSVG	0.001	36	2016-08-30 05:25:00	2016-08-30 20:38:00	2826	15.2167	Pak30_A1	0.0306398
Pak30_A2_TS3	Pak30	A2	3	PaKiT01	VSVG	0.0001	36	2016-08-30 05:25:00	2016-08-30 20:39:00	766	15.2333	Pak30_A2	0.00830505
Pak30_A3_TS3	Pak30	A3	3	PaKiT01	VSVG	0.0001	36	2016-08-30 05:25:00	2016-08-30 20:40:00	1259	15.25	Pak30_A3	0.0136502
Pak30_B2_TS3	Pak30	B2	3	PaKiT01	VSVG	0.0001	36	2016-08-30 05:25:00	2016-08-30 20:45:00	954	15.3333	Pak30_B2	0.0103434
Pak30_B1_TS3	Pak30	B1	3	PaKiT01	VSVG	0.001	36	2016-08-30 05:25:00	2016-08-30 20:46:00	2369	15.35	Pak30_B1	0.025685
Pak30_A1_TS4	Pak30	A1	4	PaKiT01	VSVG	0.001	36	2016-08-30 05:25:00	2016-08-31 09:03:00	15454	27.6333	Pak30_A1	0.167554
Pak30_A2_TS4	Pak30	A2	4	PaKiT01	VSVG	0.0001	36	2016-08-30 05:25:00	2016-08-31 09:05:00	9729	27.6667	Pak30_A2	0.105483
Pak30_A3_TS4	Pak30	A3	4	PaKiT01	VSVG	0.0001	36	2016-08-30 05:25:00	2016-08-31 09:06:00	11918	27.6833	Pak30_A3	0.129216
Pak30_B2_TS4	Pak30	B2	4	PaKiT01	VSVG	0.0001	36	2016-08-30 05:25:00	2016-08-31 09:12:00	9983	27.7833	Pak30_B2	0.108237
Pak30_B1_TS4	Pak30	B1	4	PaKiT01	VSVG	0.001	36	2016-08-30 05:25:00	2016-08-31 09:13:00	13384	27.8	Pak30_B1	0.145111
Pak30_A1_TS5	Pak30	A1	5	PaKiT01	VSVG	0.001	36	2016-08-30 05:25:00	2016-08-31 18:38:00	9296	37.2167	Pak30_A1	0.100788
Pak30_A2_TS5	Pak30	A2	5	PaKiT01	VSVG	0.0001	36	2016-08-30 05:25:00	2016-08-31 18:39:00	11188	37.2333	Pak30_A2	0.121301
Pak30_A3_TS5	Pak30	A3	5	PaKiT01	VSVG	0.0001	36	2016-08-30 05:25:00	2016-08-31 18:39:00	10115	37.2333	Pak30_A3	0.109668
Pak30_B2_TS5	Pak30	B2	5	PaKiT01	VSVG	0.0001	36	2016-08-30 05:25:00	2016-08-31 18:44:00	11385	37.3167	Pak30_B2	0.123437
Pak30_B1_TS5	Pak30	B1	5	PaKiT01	VSVG	0.001	36	2016-08-30 05:25:00	2016-08-31 18:45:00	10230	37.3333	Pak30_B1	0.110915
Pak30_A1_TS6	Pak30	A1	6	PaKiT01	VSVG	0.001	36	2016-08-30 05:25:00	2016-09-01 10:04:00	3280	52.65	Pak30_A1	0.0355621
Pak30_A2_TS6	Pak30	A2	6	PaKiT01	VSVG	0.0001	36	2016-08-30 05:25:00	2016-09-01 10:06:00	4665	52.6833	Pak30_A2	0.0505784
Pak30_A3_TS6	Pak30	A3	6	PaKiT01	VSVG	0.0001	36	2016-08-30 05:25:00	2016-09-01 10:07:00	4520	52.7	Pak30_A3	0.0490063
Pak30_B2_TS6	Pak30	B2	6	PaKiT01	VSVG	0.0001	36	2016-08-30 05:25:00	2016-09-01 10:12:00	4010	52.7833	Pak30_B2	0.0434768
Pak30_B1_TS6	Pak30	B1	6	PaKiT01	VSVG	0.001	36	2016-08-30 05:25:00	2016-09-01 10:13:00	5062	52.8	Pak30_B1	0.0548827
Pak30_A1_TS7	Pak30	A1	7	PaKiT01	VSVG	0.001	36	2016-08-30 05:25:00	2016-09-01 19:27:00	1888	62.0333	Pak30_A1	0.0204699
Pak30_A2_TS7	Pak30	A2	7	PaKiT01	VSVG	0.0001	36	2016-08-30 05:25:00	2016-09-01 19:28:00	2437	62.05	Pak30_A2	0.0264222
Pak30_A3_TS7	Pak30	A3	7	PaKiT01	VSVG	0.0001	36	2016-08-30 05:25:00	2016-09-01 19:29:00	2597	62.0667	Pak30_A3	0.028157
Pak30_B2_TS7	Pak30	B2	7	PaKiT01	VSVG	0.0001	36	2016-08-30 05:25:00	2016-09-01 19:34:00	2136	62.15	Pak30_B2	0.0231587
Pak30_B1_TS7	Pak30	B1	7	PaKiT01	VSVG	0.001	36	2016-08-30 05:25:00	2016-09-01 19:35:00	3345	62.1667	Pak30_B1	0.0362668
Pak31_A2_TS1	Pak31	A2	1	PaKiT01	MARV	0.0001	36	2016-09-16 06:10:00	2016-09-16 12:35:00	193	6.41667	Pak31_A2	0.00209253
Pak31_B2_TS1	Pak31	B2	1	PaKiT01	MARV	0.0001	36	2016-09-16 06:10:00	2016-09-16 12:44:00	121	6.56667	Pak31_B2	0.00131189
Pak31_A2_TS2	Pak31	A2	2	PaKiT01	MARV	0.0001	36	2016-09-16 06:10:00	2016-09-16 17:37:00	132	11.45	Pak31_A2	0.00143116
Pak31_B2_TS2	Pak31	B2	2	PaKiT01	MARV	0.0001	36	2016-09-16 06:10:00	2016-09-16 17:44:00	439	11.5667	Pak31_B2	0.00475968
Pak31_A2_TS3	Pak31	A2	3	PaKiT01	MARV	0.0001	36	2016-09-16 06:10:00	2016-09-16 19:27:00	231	13.2833	Pak31_A2	0.00250453
Pak31_B2_TS3	Pak31	B2	3	PaKiT01	MARV	0.0001	36	2016-09-16 06:10:00	2016-09-16 19:32:00	518	13.3667	Pak31_B2	0.00561621
Pak31_A2_TS4	Pak31	A2	4	PaKiT01	MARV	0.0001	36	2016-09-16 06:10:00	2016-09-16 21:49:00	231	15.65	Pak31_A2	0.00250453
Pak31_B2_TS4	Pak31	B2	4	PaKiT01	MARV	0.0001	36	2016-09-16 06:10:00	2016-09-16 21:54:00	572	15.7333	Pak31_B2	0.00620168
Pak31_A2_TS5	Pak31	A2	5	PaKiT01	MARV	0.0001	36	2016-09-16 06:10:00	2016-09-17 08:52:00	202	26.7	Pak31_A2	0.00219011
Pak31_B2_TS5	Pak31	B2	5	PaKiT01	MARV	0.0001	36	2016-09-16 06:10:00	2016-09-17 08:57:00	406	26.7833	Pak31_B2	0.0044019
Pak32_A2_TS1	Pak32	A2	1	PaKiT01	MARV	0.0001	36	2016-09-16 06:10:00	2016-09-16 13:03:00	19	6.88333	Pak32_A2	0.000206
Pak32_B2_TS1	Pak32	B2	1	PaKiT01	MARV	0.0001	36	2016-09-16 06:10:00	2016-09-16 13:14:00	0	7.06667	Pak32_B2	0
Pak32_A2_TS2	Pak32	A2	2	PaKiT01	MARV	0.0001	36	2016-09-16 06:10:00	2016-09-16 17:47:00	256	11.6167	Pak32_A2	0.00277558
Pak32_B2_TS2	Pak32	B2	2	PaKiT01	MARV	0.0001	36	2016-09-16 06:10:00	2016-09-16 17:54:00	183	11.7333	Pak32_B2	0.00198411
Pak32_A2_TS3	Pak32	A2	3	PaKiT01	MARV	0.0001	36	2016-09-16 06:10:00	2016-09-16 19:36:00	266	13.4333	Pak32_A2	0.002884
Pak32_B2_TS3	Pak32	B2	3	PaKiT01	MARV	0.0001	36	2016-09-16 06:10:00	2016-09-16 19:42:00	233	13.5333	Pak32_B2	0.00252621
Pak32_A2_TS4	Pak32	A2	4	PaKiT01	MARV	0.0001	36	2016-09-16 06:10:00	2016-09-16 21:57:00	364	15.7833	Pak32_A2	0.00394653
Pak32_B2_TS4	Pak32	B2	4	PaKiT01	MARV	0.0001	36	2016-09-16 06:10:00	2016-09-16 22:02:00	344	15.8667	Pak32_B2	0.00372968
Pak32_A2_TS5	Pak32	A2	5	PaKiT01	MARV	0.0001	36	2016-09-16 06:10:00	2016-09-17 09:02:00	276	26.8667	Pak32_A2	0.00299242
Pak32_B2_TS5	Pak32	B2	5	PaKiT01	MARV	0.0001	36	2016-09-16 06:10:00	2016-09-17 09:07:00	182	26.95	Pak32_B2	0.00197326
Pak32_A2_TS6	Pak32	A2	6	PaKiT01	MARV	0.0001	36	2016-09-16 06:10:00	2016-09-17 17:54:00	91	35.7333	Pak32_A2	0.000986632
Pak32_B2_TS6	Pak32	B2	6	PaKiT01	MARV	0.0001	36	2016-09-16 06:10:00	2016-09-17 18:01:00	187	35.85	Pak32_B2	0.00202747
Pak32_A2_TS7	Pak32	A2	7	PaKiT01	MARV	0.0001	36	2016-09-16 06:10:00	2016-09-18 08:42:00	162	50.5333	Pak32_A2	0.00175642
Pak32_B2_TS7	Pak32	B2	7	PaKiT01	MARV	0.0001	36	2016-09-16 06:10:00	2016-09-18 08:49:00	24	50.65	Pak32_B2	0.000260211
Pak32_A2_TS8	Pak32	A2	8	PaKiT01	MARV	0.0001	36	2016-09-16 06:10:00	2016-09-18 20:26:00	42	62.2667	Pak32_A2	0.000455368
Pak32_B2_TS8	Pak32	B2	8	PaKiT01	MARV	0.0001	36	2016-09-16 06:10:00	2016-09-18 20:36:00	204	62.4333	Pak32_B2	0.00221179
Pak32_A2_TS9	Pak32	A2	9	PaKiT01	MARV	0.0001	36	2016-09-16 06:10:00	2016-09-19 10:54:00	4	76.7333	Pak32_A2	4.33684e-05
Pak32_B2_TS9	Pak32	B2	9	PaKiT01	MARV	0.0001	36	2016-09-16 06:10:00	2016-09-19 11:04:00	16	76.9	Pak32_B2	0.000173474
Pak32_A2_TS10	Pak32	A2	10	PaKiT01	MARV	0.0001	36	2016-09-16 06:10:00	2016-09-19 19:36:00	199	85.4333	Pak32_A2	0.00215758
Pak32_B2_TS10	Pak32	B2	10	PaKiT01	MARV	0.0001	36	2016-09-16 06:10:00	2016-09-19 19:49:00	4	85.65	Pak32_B2	4.33684e-05
Pak32_A2_TS11	Pak32	A2	11	PaKiT01	MARV	0.0001	36	2016-09-16 06:10:00	2016-09-20 09:29:00	2	99.3167	Pak32_A2	2.16842e-05
Pak32_B2_TS11	Pak32	B2	11	PaKiT01	MARV	0.0001	36	2016-09-16 06:10:00	2016-09-20 09:39:00	24	99.4833	Pak32_B2	0.000260211
Pak32_A2_TS12	Pak32	A2	12	PaKiT01	MARV	0.0001	36	2016-09-16 06:10:00	2016-09-20 17:04:00	2	106.9	Pak32_A2	2.16842e-05
Pak32_B2_TS12	Pak32	B2	12	PaKiT01	MARV	0.0001	36	2016-09-16 06:10:00	2016-09-20 17:14:00	111	107.067	Pak32_B2	0.00120347
Pak33_A1_TS1	Pak33	A1	1	PaKiT01	MARV	0.001	36	2016-09-16 05:44:00	2016-09-16 13:29:00	97	7.75	Pak33_A1	0.00105168
Pak33_A2_TS1	Pak33	A2	1	PaKiT01	MARV	0.0001	36	2016-09-16 06:10:00	2016-09-16 13:31:00	0	7.35	Pak33_A2	0
Pak33_A3_TS1	Pak33	A3	1	PaKiT01	MARV	0.0001	36	2016-09-16 05:44:00	2016-09-16 13:34:00	127	7.83333	Pak33_A3	0.00137695
Pak33_B2_TS1	Pak33	B2	1	PaKiT01	MARV	0.0001	36	2016-09-16 06:10:00	2016-09-16 13:40:00	57	7.5	Pak33_B2	0.000618
Pak33_B1_TS1	Pak33	B1	1	PaKiT01	MARV	0.001	36	2016-09-16 05:44:00	2016-09-16 13:44:00	0	8	Pak33_B1	0
Pak33_A1_TS2	Pak33	A1	2	PaKiT01	MARV	0.001	36	2016-09-16 05:44:00	2016-09-16 18:07:00	1391	12.3833	Pak33_A1	0.0150814
Pak33_A2_TS2	Pak33	A2	2	PaKiT01	MARV	0.0001	36	2016-09-16 06:10:00	2016-09-16 18:08:00	181	11.9667	Pak33_A2	0.00196242
Pak33_A3_TS2	Pak33	A3	2	PaKiT01	MARV	0.0001	36	2016-09-16 05:44:00	2016-09-16 18:10:00	237	12.4333	Pak33_A3	0.00256958
Pak33_B2_TS2	Pak33	B2	2	PaKiT01	MARV	0.0001	36	2016-09-16 06:10:00	2016-09-16 18:17:00	205	12.1167	Pak33_B2	0.00222263
Pak33_B1_TS2	Pak33	B1	2	PaKiT01	MARV	0.001	36	2016-09-16 05:44:00	2016-09-16 18:17:00	1478	12.55	Pak33_B1	0.0160246
Pak33_A1_TS3	Pak33	A1	3	PaKiT01	MARV	0.001	36	2016-09-16 05:44:00	2016-09-16 19:59:00	1550	14.25	Pak33_A1	0.0168053
Pak33_A2_TS3	Pak33	A2	3	PaKiT01	MARV	0.0001	36	2016-09-16 06:10:00	2016-09-16 20:00:00	308	13.8333	Pak33_A2	0.00333937
Pak33_A3_TS3	Pak33	A3	3	PaKiT01	MARV	0.0001	36	2016-09-16 05:44:00	2016-09-16 20:02:00	351	14.3	Pak33_A3	0.00380558
Pak33_B2_TS3	Pak33	B2	3	PaKiT01	MARV	0.0001	36	2016-09-16 06:10:00	2016-09-16 20:07:00	221	13.95	Pak33_B2	0.00239611
Pak33_B1_TS3	Pak33	B1	3	PaKiT01	MARV	0.001	36	2016-09-16 05:44:00	2016-09-16 20:08:00	1708	14.4	Pak33_B1	0.0185183
Pak33_A1_TS4	Pak33	A1	4	PaKiT01	MARV	0.001	36	2016-09-16 05:44:00	2016-09-16 22:13:00	1650	16.4833	Pak33_A1	0.0178895
Pak33_A2_TS4	Pak33	A2	4	PaKiT01	MARV	0.0001	36	2016-09-16 06:10:00	2016-09-16 22:14:00	382	16.0667	Pak33_A2	0.00414168
Pak33_A3_TS4	Pak33	A3	4	PaKiT01	MARV	0.0001	36	2016-09-16 05:44:00	2016-09-16 22:15:00	372	16.5167	Pak33_A3	0.00403326
Pak33_B2_TS4	Pak33	B2	4	PaKiT01	MARV	0.0001	36	2016-09-16 06:10:00	2016-09-16 22:19:00	268	16.15	Pak33_B2	0.00290568
Pak33_B1_TS4	Pak33	B1	4	PaKiT01	MARV	0.001	36	2016-09-16 05:44:00	2016-09-16 22:20:00	1886	16.6	Pak33_B1	0.0204482
Pak33_A1_TS5	Pak33	A1	5	PaKiT01	MARV	0.001	36	2016-09-16 05:44:00	2016-09-17 09:19:00	1012	27.5833	Pak33_A1	0.0109722
Pak33_A2_TS5	Pak33	A2	5	PaKiT01	MARV	0.0001	36	2016-09-16 06:10:00	2016-09-17 09:21:00	245	27.1833	Pak33_A2	0.00265632
Pak33_A3_TS5	Pak33	A3	5	PaKiT01	MARV	0.0001	36	2016-09-16 05:44:00	2016-09-17 09:22:00	206	27.6333	Pak33_A3	0.00223347
Pak33_B2_TS5	Pak33	B2	5	PaKiT01	MARV	0.0001	36	2016-09-16 06:10:00	2016-09-17 09:25:00	217	27.25	Pak33_B2	0.00235274
Pak33_B1_TS5	Pak33	B1	5	PaKiT01	MARV	0.001	36	2016-09-16 05:44:00	2016-09-17 09:26:00	1235	27.7	Pak33_B1	0.01339
Pak33_A1_TS6	Pak33	A1	6	PaKiT01	MARV	0.001	36	2016-09-16 05:44:00	2016-09-17 18:14:00	513	36.5	Pak33_A1	0.005562
Pak33_A2_TS6	Pak33	A2	6	PaKiT01	MARV	0.0001	36	2016-09-16 06:10:00	2016-09-17 18:16:00	109	36.1	Pak33_A2	0.00118179
Pak33_A3_TS6	Pak33	A3	6	PaKiT01	MARV	0.0001	36	2016-09-16 05:44:00	2016-09-17 18:18:00	132	36.5667	Pak33_A3	0.00143116
Pak33_B2_TS6	Pak33	B2	6	PaKiT01	MARV	0.0001	36	2016-09-16 06:10:00	2016-09-17 18:23:00	94	36.2167	Pak33_B2	0.00101916
Pak33_B1_TS6	Pak33	B1	6	PaKiT01	MARV	0.001	36	2016-09-16 05:44:00	2016-09-17 18:25:00	621	36.6833	Pak33_B1	0.00673295
Pak33_A1_TS7	Pak33	A1	7	PaKiT01	MARV	0.001	36	2016-09-16 05:44:00	2016-09-18 07:46:00	261	50.0333	Pak33_A1	0.00282979
Pak33_A2_TS7	Pak33	A2	7	PaKiT01	MARV	0.0001	36	2016-09-16 06:10:00	2016-09-18 07:49:00	182	49.65	Pak33_A2	0.00197326
Pak33_A3_TS7	Pak33	A3	7	PaKiT01	MARV	0.0001	36	2016-09-16 05:44:00	2016-09-18 07:52:00	47	50.1333	Pak33_A3	0.000509579
Pak33_B2_TS7	Pak33	B2	7	PaKiT01	MARV	0.0001	36	2016-09-16 06:10:00	2016-09-18 07:57:00	65	49.7833	Pak33_B2	0.000704737
Pak33_B1_TS7	Pak33	B1	7	PaKiT01	MARV	0.001	36	2016-09-16 05:44:00	2016-09-18 07:59:00	364	50.25	Pak33_B1	0.00394653
Pak34_A1_TS1	Pak34	A1	1	PaKiT01	MARV	0.001	36	2016-09-16 05:44:00	2016-09-16 14:21:00	0	8.61667	Pak34_A1	0
Pak34_A2_TS1	Pak34	A2	1	PaKiT01	MARV	0.0001	36	2016-09-16 06:10:00	2016-09-16 14:25:00	1	8.25	Pak34_A2	1.08421e-05
Pak34_A3_TS1	Pak34	A3	1	PaKiT01	MARV	0.0001	36	2016-09-16 05:44:00	2016-09-16 14:28:00	0	8.73333	Pak34_A3	0
Pak34_B2_TS1	Pak34	B2	1	PaKiT01	MARV	0.0001	36	2016-09-16 06:10:00	2016-09-16 14:35:00	0	8.41667	Pak34_B2	0
Pak34_B1_TS1	Pak34	B1	1	PaKiT01	MARV	0.001	36	2016-09-16 05:44:00	2016-09-16 14:38:00	36	8.9	Pak34_B1	0.000390316
Pak34_A1_TS2	Pak34	A1	2	PaKiT01	MARV	0.001	36	2016-09-16 05:44:00	2016-09-16 18:32:00	1049	12.8	Pak34_A1	0.0113734
Pak34_A2_TS2	Pak34	A2	2	PaKiT01	MARV	0.0001	36	2016-09-16 06:10:00	2016-09-16 18:34:00	136	12.4	Pak34_A2	0.00147453
Pak34_A3_TS2	Pak34	A3	2	PaKiT01	MARV	0.0001	36	2016-09-16 05:44:00	2016-09-16 18:36:00	303	12.8667	Pak34_A3	0.00328516
Pak34_B2_TS2	Pak34	B2	2	PaKiT01	MARV	0.0001	36	2016-09-16 06:10:00	2016-09-16 18:42:00	208	12.5333	Pak34_B2	0.00225516
Pak34_B1_TS2	Pak34	B1	2	PaKiT01	MARV	0.001	36	2016-09-16 05:44:00	2016-09-16 18:43:00	1312	12.9833	Pak34_B1	0.0142248
Pak34_A1_TS3	Pak34	A1	3	PaKiT01	MARV	0.001	36	2016-09-16 05:44:00	2016-09-16 20:25:00	1173	14.6833	Pak34_A1	0.0127178
Pak34_A2_TS3	Pak34	A2	3	PaKiT01	MARV	0.0001	36	2016-09-16 06:10:00	2016-09-16 20:26:00	222	14.2667	Pak34_A2	0.00240695
Pak34_A3_TS3	Pak34	A3	3	PaKiT01	MARV	0.0001	36	2016-09-16 05:44:00	2016-09-16 20:27:00	343	14.7167	Pak34_A3	0.00371884
Pak34_B2_TS3	Pak34	B2	3	PaKiT01	MARV	0.0001	36	2016-09-16 06:10:00	2016-09-16 20:31:00	211	14.35	Pak34_B2	0.00228768
Pak34_B1_TS3	Pak34	B1	3	PaKiT01	MARV	0.001	36	2016-09-16 05:44:00	2016-09-16 20:32:00	1418	14.8	Pak34_B1	0.0153741
Pak34_A1_TS4	Pak34	A1	4	PaKiT01	MARV	0.001	36	2016-09-16 05:44:00	2016-09-16 22:34:00	1251	16.8333	Pak34_A1	0.0135635
Pak34_A2_TS4	Pak34	A2	4	PaKiT01	MARV	0.0001	36	2016-09-16 06:10:00	2016-09-16 22:35:00	335	16.4167	Pak34_A2	0.00363211
Pak34_A3_TS4	Pak34	A3	4	PaKiT01	MARV	0.0001	36	2016-09-16 05:44:00	2016-09-16 22:36:00	389	16.8667	Pak34_A3	0.00421758
Pak34_B2_TS4	Pak34	B2	4	PaKiT01	MARV	0.0001	36	2016-09-16 06:10:00	2016-09-16 22:41:00	260	16.5167	Pak34_B2	0.00281895
Pak34_B1_TS4	Pak34	B1	4	PaKiT01	MARV	0.001	36	2016-09-16 05:44:00	2016-09-16 22:43:00	1468	16.9833	Pak34_B1	0.0159162
Pak34_A1_TS5	Pak34	A1	5	PaKiT01	MARV	0.001	36	2016-09-16 05:44:00	2016-09-17 09:41:00	766	27.95	Pak34_A1	0.00830505
Pak34_A2_TS5	Pak34	A2	5	PaKiT01	MARV	0.0001	36	2016-09-16 06:10:00	2016-09-17 09:42:00	132	27.5333	Pak34_A2	0.00143116
Pak34_A3_TS5	Pak34	A3	5	PaKiT01	MARV	0.0001	36	2016-09-16 05:44:00	2016-09-17 09:43:00	215	27.9833	Pak34_A3	0.00233105
Pak34_B2_TS5	Pak34	B2	5	PaKiT01	MARV	0.0001	36	2016-09-16 06:10:00	2016-09-17 09:47:00	151	27.6167	Pak34_B2	0.00163716
Pak34_B1_TS5	Pak34	B1	5	PaKiT01	MARV	0.001	36	2016-09-16 05:44:00	2016-09-17 09:48:00	824	28.0667	Pak34_B1	0.0089339
Pak34_A1_TS6	Pak34	A1	6	PaKiT01	MARV	0.001	36	2016-09-16 05:44:00	2016-09-17 18:38:00	406	36.9	Pak34_A1	0.0044019
Pak34_A2_TS6	Pak34	A2	6	PaKiT01	MARV	0.0001	36	2016-09-16 06:10:00	2016-09-17 18:40:00	101	36.5	Pak34_A2	0.00109505
Pak34_A3_TS6	Pak34	A3	6	PaKiT01	MARV	0.0001	36	2016-09-16 05:44:00	2016-09-17 18:42:00	187	36.9667	Pak34_A3	0.00202747
Pak34_B2_TS6	Pak34	B2	6	PaKiT01	MARV	0.0001	36	2016-09-16 06:10:00	2016-09-17 18:48:00	90	36.6333	Pak34_B2	0.00097579
Pak34_B1_TS6	Pak34	B1	6	PaKiT01	MARV	0.001	36	2016-09-16 05:44:00	2016-09-17 18:50:00	460	37.1	Pak34_B1	0.00498737
Pak34_A1_TS7	Pak34	A1	7	PaKiT01	MARV	0.001	36	2016-09-16 05:44:00	2016-09-18 09:04:00	208	51.3333	Pak34_A1	0.00225516
Pak34_A2_TS7	Pak34	A2	7	PaKiT01	MARV	0.0001	36	2016-09-16 06:10:00	2016-09-18 09:08:00	171	50.9667	Pak34_A2	0.001854
Pak34_A3_TS7	Pak34	A3	7	PaKiT01	MARV	0.0001	36	2016-09-16 05:44:00	2016-09-18 09:09:00	61	51.4167	Pak34_A3	0.000661368
Pak34_B2_TS7	Pak34	B2	7	PaKiT01	MARV	0.0001	36	2016-09-16 06:10:00	2016-09-18 09:15:00	95	51.0833	Pak34_B2	0.00103
Pak34_B1_TS7	Pak34	B1	7	PaKiT01	MARV	0.001	36	2016-09-16 05:44:00	2016-09-18 09:17:00	280	51.55	Pak34_B1	0.00303579
Pak34_A1_TS8	Pak34	A1	8	PaKiT01	MARV	0.001	36	2016-09-16 05:44:00	2016-09-18 20:49:00	222	63.0833	Pak34_A1	0.00240695
Pak34_A2_TS8	Pak34	A2	8	PaKiT01	MARV	0.0001	36	2016-09-16 06:10:00	2016-09-18 20:52:00	184	62.7	Pak34_A2	0.00199495
Pak34_A3_TS8	Pak34	A3	8	PaKiT01	MARV	0.0001	36	2016-09-16 05:44:00	2016-09-18 20:55:00	32	63.1833	Pak34_A3	0.000346947
Pak34_B2_TS8	Pak34	B2	8	PaKiT01	MARV	0.0001	36	2016-09-16 06:10:00	2016-09-18 21:03:00	7	62.8833	Pak34_B2	7.58947e-05
Pak34_B1_TS8	Pak34	B1	8	PaKiT01	MARV	0.001	36	2016-09-16 05:44:00	2016-09-18 21:05:00	283	63.35	Pak34_B1	0.00306832
Pak34_A1_TS9	Pak34	A1	9	PaKiT01	MARV	0.001	36	2016-09-16 05:44:00	2016-09-19 09:18:00	224	75.5667	Pak34_A1	0.00242863
Pak34_A2_TS9	Pak34	A2	9	PaKiT01	MARV	0.0001	36	2016-09-16 06:10:00	2016-09-19 09:22:00	325	75.2	Pak34_A2	0.00352368
Pak34_A3_TS9	Pak34	A3	9	PaKiT01	MARV	0.0001	36	2016-09-16 05:44:00	2016-09-19 09:26:00	149	75.7	Pak34_A3	0.00161547
Pak34_B2_TS9	Pak34	B2	9	PaKiT01	MARV	0.0001	36	2016-09-16 06:10:00	2016-09-19 09:33:00	12	75.3833	Pak34_B2	0.000130105
Pak34_B1_TS9	Pak34	B1	9	PaKiT01	MARV	0.001	36	2016-09-16 05:44:00	2016-09-19 09:36:00	119	75.8667	Pak34_B1	0.00129021
Pak35_A2_TS1	Pak35	A2	1	PaKiT01	MARV	0.0001	36	2016-09-18 04:54:00	2016-09-18 11:31:00	0	6.61667	Pak35_A2	0
Pak35_B2_TS1	Pak35	B2	1	PaKiT01	MARV	0.0001	36	2016-09-18 04:54:00	2016-09-18 11:43:00	98	6.81667	Pak35_B2	0.00106253
Pak35_A2_TS2	Pak35	A2	2	PaKiT01	MARV	0.0001	36	2016-09-18 04:54:00	2016-09-18 14:43:00	74	9.81667	Pak35_A2	0.000802316
Pak35_B2_TS2	Pak35	B2	2	PaKiT01	MARV	0.0001	36	2016-09-18 04:54:00	2016-09-18 14:51:00	313	9.95	Pak35_B2	0.00339358
Pak35_A2_TS3	Pak35	A2	3	PaKiT01	MARV	0.0001	36	2016-09-18 04:54:00	2016-09-18 18:08:00	223	13.2333	Pak35_A2	0.00241779
Pak35_B2_TS3	Pak35	B2	3	PaKiT01	MARV	0.0001	36	2016-09-18 04:54:00	2016-09-18 18:14:00	272	13.3333	Pak35_B2	0.00294905
Pak35_A2_TS4	Pak35	A2	4	PaKiT01	MARV	0.0001	36	2016-09-18 04:54:00	2016-09-18 21:07:00	358	16.2167	Pak35_A2	0.00388147
Pak35_B2_TS4	Pak35	B2	4	PaKiT01	MARV	0.0001	36	2016-09-18 04:54:00	2016-09-18 21:13:00	352	16.3167	Pak35_B2	0.00381642
Pak35_A2_TS5	Pak35	A2	5	PaKiT01	MARV	0.0001	36	2016-09-18 04:54:00	2016-09-19 08:50:00	191	27.9333	Pak35_A2	0.00207084
Pak35_B2_TS5	Pak35	B2	5	PaKiT01	MARV	0.0001	36	2016-09-18 04:54:00	2016-09-19 08:56:00	197	28.0333	Pak35_B2	0.00213589
Pak35_A2_TS6	Pak35	A2	6	PaKiT01	MARV	0.0001	36	2016-09-18 04:54:00	2016-09-19 18:57:00	71	38.05	Pak35_A2	0.00076979
Pak35_B2_TS6	Pak35	B2	6	PaKiT01	MARV	0.0001	36	2016-09-18 04:54:00	2016-09-19 19:03:00	223	38.15	Pak35_B2	0.00241779
Pak35_A2_TS7	Pak35	A2	7	PaKiT01	MARV	0.0001	36	2016-09-18 04:54:00	2016-09-20 08:43:00	34	51.8167	Pak35_A2	0.000368632
Pak35_B2_TS7	Pak35	B2	7	PaKiT01	MARV	0.0001	36	2016-09-18 04:54:00	2016-09-20 08:51:00	186	51.95	Pak35_B2	0.00201663
Pak36_A2_TS1	Pak36	A2	1	PaKiT01	MARV	0.0001	36	2016-09-18 04:54:00	2016-09-18 11:51:00	0	6.95	Pak36_A2	0
Pak36_B2_TS1	Pak36	B2	1	PaKiT01	MARV	0.0001	36	2016-09-18 04:54:00	2016-09-18 11:59:00	52	7.08333	Pak36_B2	0.00056379
Pak36_A2_TS2	Pak36	A2	2	PaKiT01	MARV	0.0001	36	2016-09-18 04:54:00	2016-09-18 14:59:00	47	10.0833	Pak36_A2	0.000509579
Pak36_B2_TS2	Pak36	B2	2	PaKiT01	MARV	0.0001	36	2016-09-18 04:54:00	2016-09-18 15:06:00	197	10.2	Pak36_B2	0.00213589
Pak36_A2_TS3	Pak36	A2	3	PaKiT01	MARV	0.0001	36	2016-09-18 04:54:00	2016-09-18 18:18:00	380	13.4	Pak36_A2	0.00412
Pak36_B2_TS3	Pak36	B2	3	PaKiT01	MARV	0.0001	36	2016-09-18 04:54:00	2016-09-18 18:23:00	488	13.4833	Pak36_B2	0.00529095
Pak36_A2_TS4	Pak36	A2	4	PaKiT01	MARV	0.0001	36	2016-09-18 04:54:00	2016-09-18 21:16:00	449	16.3667	Pak36_A2	0.00486811
Pak36_B2_TS4	Pak36	B2	4	PaKiT01	MARV	0.0001	36	2016-09-18 04:54:00	2016-09-18 21:21:00	430	16.45	Pak36_B2	0.00466211
Pak36_A2_TS5	Pak36	A2	5	PaKiT01	MARV	0.0001	36	2016-09-18 04:54:00	2016-09-19 08:59:00	250	28.0833	Pak36_A2	0.00271053
Pak36_B2_TS5	Pak36	B2	5	PaKiT01	MARV	0.0001	36	2016-09-18 04:54:00	2016-09-19 09:05:00	354	28.1833	Pak36_B2	0.00383811
Pak36_A2_TS6	Pak36	A2	6	PaKiT01	MARV	0.0001	36	2016-09-18 04:54:00	2016-09-19 19:17:00	210	38.3833	Pak36_A2	0.00227684
Pak36_B2_TS6	Pak36	B2	6	PaKiT01	MARV	0.0001	36	2016-09-18 04:54:00	2016-09-19 19:22:00	247	38.4667	Pak36_B2	0.002678
Pak36_A2_TS7	Pak36	A2	7	PaKiT01	MARV	0.0001	36	2016-09-18 04:54:00	2016-09-20 09:06:00	166	52.2	Pak36_A2	0.00179979
Pak36_B2_TS7	Pak36	B2	7	PaKiT01	MARV	0.0001	36	2016-09-18 04:54:00	2016-09-20 09:12:00	86	52.3	Pak36_B2	0.000932421
Pak36_A2_TS8	Pak36	A2	8	PaKiT01	MARV	0.0001	36	2016-09-18 04:54:00	2016-09-20 18:01:00	202	61.1167	Pak36_A2	0.00219011
Pak36_B2_TS8	Pak36	B2	8	PaKiT01	MARV	0.0001	36	2016-09-18 04:54:00	2016-09-20 18:10:00	27	61.2667	Pak36_B2	0.000292737
Pak36_A2_TS9	Pak36	A2	9	PaKiT01	MARV	0.0001	36	2016-09-18 04:54:00	2016-09-21 09:27:00	374	76.55	Pak36_A2	0.00405495
Pak36_B2_TS9	Pak36	B2	9	PaKiT01	MARV	0.0001	36	2016-09-18 04:54:00	2016-09-21 09:35:00	143	76.6833	Pak36_B2	0.00155042
Pak36_A2_TS10	Pak36	A2	10	PaKiT01	MARV	0.0001	36	2016-09-18 04:54:00	2016-09-21 17:31:00	191	84.6167	Pak36_A2	0.00207084
Pak36_B2_TS10	Pak36	B2	10	PaKiT01	MARV	0.0001	36	2016-09-18 04:54:00	2016-09-21 17:38:00	175	84.7333	Pak36_B2	0.00189737
Pak36_A2_TS11	Pak36	A2	11	PaKiT01	MARV	0.0001	36	2016-09-18 04:54:00	2016-09-22 10:49:00	144	101.917	Pak36_A2	0.00156126
Pak36_B2_TS11	Pak36	B2	11	PaKiT01	MARV	0.0001	36	2016-09-18 04:54:00	2016-09-22 10:58:00	7	102.067	Pak36_B2	7.58947e-05
Pak36_A2_TS12	Pak36	A2	12	PaKiT01	MARV	0.0001	36	2016-09-18 04:54:00	2016-09-22 21:20:00	21	112.433	Pak36_A2	0.000227684
Pak36_B2_TS12	Pak36	B2	12	PaKiT01	MARV	0.0001	36	2016-09-18 04:54:00	2016-09-22 21:29:00	11	112.583	Pak36_B2	0.000119263
Pak36_A2_TS13	Pak36	A2	13	PaKiT01	MARV	0.0001	36	2016-09-18 04:54:00	2016-09-23 06:22:00	33	121.467	Pak36_A2	0.00035779
Pak36_B2_TS13	Pak36	B2	13	PaKiT01	MARV	0.0001	36	2016-09-18 04:54:00	2016-09-23 06:31:00	132	121.617	Pak36_B2	0.00143116
Pak36_A2_TS14	Pak36	A2	14	PaKiT01	MARV	0.0001	36	2016-09-18 04:54:00	2016-09-24 11:53:00	29	150.983	Pak36_A2	0.000314421
Pak36_B2_TS14	Pak36	B2	14	PaKiT01	MARV	0.0001	36	2016-09-18 04:54:00	2016-09-24 00:01:00	280	139.117	Pak36_B2	0.00303579
Pak36_A2_TS15	Pak36	A2	15	PaKiT01	MARV	0.0001	36	2016-09-18 04:54:00	2016-09-25 00:13:00	31	163.317	Pak36_A2	0.000336105
Pak36_B2_TS15	Pak36	B2	15	PaKiT01	MARV	0.0001	36	2016-09-18 04:54:00	2016-09-25 00:21:00	0	163.45	Pak36_B2	0
Pak36_A2_TS16	Pak36	A2	16	PaKiT01	MARV	0.0001	36	2016-09-18 04:54:00	2016-09-25 11:39:00	27	174.75	Pak36_A2	0.000292737
Pak36_B2_TS16	Pak36	B2	16	PaKiT01	MARV	0.0001	36	2016-09-18 04:54:00	2016-09-25 11:48:00	156	174.9	Pak36_B2	0.00169137
Pak36_A2_TS17	Pak36	A2	17	PaKiT01	MARV	0.0001	36	2016-09-18 04:54:00	2016-09-25 19:08:00	137	182.233	Pak36_A2	0.00148537
Pak36_B2_TS17	Pak36	B2	17	PaKiT01	MARV	0.0001	36	2016-09-18 04:54:00	2016-09-25 19:18:00	158	182.4	Pak36_B2	0.00171305
Pak37_A1_TS1	Pak37	A1	1	PaKiT01	MARV	0.001	36	2016-09-18 04:54:00	2016-09-18 12:44:00	27	7.83333	Pak37_A1	0.000292737
Pak37_A2_TS1	Pak37	A2	1	PaKiT01	MARV	0.0001	36	2016-09-18 04:54:00	2016-09-18 12:47:00	20	7.88333	Pak37_A2	0.000216842
Pak37_A3_TS1	Pak37	A3	1	PaKiT01	MARV	0.0001	36	2016-09-18 04:54:00	2016-09-18 12:50:00	133	7.93333	Pak37_A3	0.001442
Pak37_B2_TS1	Pak37	B2	1	PaKiT01	MARV	0.0001	36	2016-09-18 04:54:00	2016-09-18 12:57:00	67	8.05	Pak37_B2	0.000726421
Pak37_B1_TS1	Pak37	B1	1	PaKiT01	MARV	0.001	36	2016-09-18 05:17:00	2016-09-18 12:59:00	3	7.7	Pak37_B1	3.25263e-05
Pak37_A1_TS2	Pak37	A1	2	PaKiT01	MARV	0.001	36	2016-09-18 04:54:00	2016-09-18 15:34:00	1345	10.6667	Pak37_A1	0.0145826
Pak37_A2_TS2	Pak37	A2	2	PaKiT01	MARV	0.0001	36	2016-09-18 04:54:00	2016-09-18 15:38:00	48	10.7333	Pak37_A2	0.000520421
Pak37_A3_TS2	Pak37	A3	2	PaKiT01	MARV	0.0001	36	2016-09-18 04:54:00	2016-09-18 15:40:00	317	10.7667	Pak37_A3	0.00343695
Pak37_B2_TS2	Pak37	B2	2	PaKiT01	MARV	0.0001	36	2016-09-18 04:54:00	2016-09-18 15:46:00	268	10.8667	Pak37_B2	0.00290568
Pak37_B1_TS2	Pak37	B1	2	PaKiT01	MARV	0.001	36	2016-09-18 05:17:00	2016-09-18 15:48:00	1369	10.5167	Pak37_B1	0.0148428
Pak37_A1_TS3	Pak37	A1	3	PaKiT01	MARV	0.001	36	2016-09-18 04:54:00	2016-09-18 18:45:00	1550	13.85	Pak37_A1	0.0168053
Pak37_A2_TS3	Pak37	A2	3	PaKiT01	MARV	0.0001	36	2016-09-18 04:54:00	2016-09-18 18:46:00	429	13.8667	Pak37_A2	0.00465126
Pak37_A3_TS3	Pak37	A3	3	PaKiT01	MARV	0.0001	36	2016-09-18 04:54:00	2016-09-18 18:48:00	562	13.9	Pak37_A3	0.00609326
Pak37_B2_TS3	Pak37	B2	3	PaKiT01	MARV	0.0001	36	2016-09-18 04:54:00	2016-09-18 18:53:00	516	13.9833	Pak37_B2	0.00559453
Pak37_B1_TS3	Pak37	B1	3	PaKiT01	MARV	0.001	36	2016-09-18 05:17:00	2016-09-18 18:55:00	1513	13.6333	Pak37_B1	0.0164041
Pak37_A1_TS4	Pak37	A1	4	PaKiT01	MARV	0.001	36	2016-09-18 04:54:00	2016-09-18 21:56:00	1647	17.0333	Pak37_A1	0.0178569
Pak37_A2_TS4	Pak37	A2	4	PaKiT01	MARV	0.0001	36	2016-09-18 04:54:00	2016-09-18 21:57:00	485	17.05	Pak37_A2	0.00525842
Pak37_A3_TS4	Pak37	A3	4	PaKiT01	MARV	0.0001	36	2016-09-18 04:54:00	2016-09-18 21:58:00	518	17.0667	Pak37_A3	0.00561621
Pak37_B2_TS4	Pak37	B2	4	PaKiT01	MARV	0.0001	36	2016-09-18 04:54:00	2016-09-18 22:02:00	488	17.1333	Pak37_B2	0.00529095
Pak37_B1_TS4	Pak37	B1	4	PaKiT01	MARV	0.001	36	2016-09-18 05:17:00	2016-09-18 22:03:00	1663	16.7667	Pak37_B1	0.0180304
Pak37_A1_TS5	Pak37	A1	5	PaKiT01	MARV	0.001	36	2016-09-18 04:54:00	2016-09-19 09:38:00	1077	28.7333	Pak37_A1	0.0116769
Pak37_A2_TS5	Pak37	A2	5	PaKiT01	MARV	0.0001	36	2016-09-18 04:54:00	2016-09-19 09:39:00	282	28.75	Pak37_A2	0.00305747
Pak37_A3_TS5	Pak37	A3	5	PaKiT01	MARV	0.0001	36	2016-09-18 04:54:00	2016-09-19 09:40:00	385	28.7667	Pak37_A3	0.00417421
Pak37_B2_TS5	Pak37	B2	5	PaKiT01	MARV	0.0001	36	2016-09-18 04:54:00	2016-09-19 09:44:00	338	28.8333	Pak37_B2	0.00366463
Pak37_B1_TS5	Pak37	B1	5	PaKiT01	MARV	0.001	36	2016-09-18 05:17:00	2016-09-19 09:45:00	1171	28.4667	Pak37_B1	0.0126961
Pak38_A1_TS1	Pak38	A1	1	PaKiT01	MARV	0.001	36	2016-09-18 04:54:00	2016-09-18 13:22:00	171	8.46667	Pak38_A1	0.001854
Pak38_A2_TS1	Pak38	A2	1	PaKiT01	MARV	0.0001	36	2016-09-18 04:54:00	2016-09-18 13:25:00	41	8.51667	Pak38_A2	0.000444526
Pak38_A3_TS1	Pak38	A3	1	PaKiT01	MARV	0.0001	36	2016-09-18 04:54:00	2016-09-18 13:29:00	24	8.58333	Pak38_A3	0.000260211
Pak38_B2_TS1	Pak38	B2	1	PaKiT01	MARV	0.0001	36	2016-09-18 04:54:00	2016-09-18 13:35:00	2	8.68333	Pak38_B2	2.16842e-05
Pak38_B1_TS1	Pak38	B1	1	PaKiT01	MARV	0.001	36	2016-09-18 04:54:00	2016-09-18 13:38:00	405	8.73333	Pak38_B1	0.00439105
Pak38_A1_TS2	Pak38	A1	2	PaKiT01	MARV	0.001	36	2016-09-18 04:54:00	2016-09-18 16:01:00	1775	11.1167	Pak38_A1	0.0192447
Pak38_A2_TS2	Pak38	A2	2	PaKiT01	MARV	0.0001	36	2016-09-18 04:54:00	2016-09-18 16:02:00	382	11.1333	Pak38_A2	0.00414168
Pak38_A3_TS2	Pak38	A3	2	PaKiT01	MARV	0.0001	36	2016-09-18 04:54:00	2016-09-18 16:06:00	431	11.2	Pak38_A3	0.00467295
Pak38_B2_TS2	Pak38	B2	2	PaKiT01	MARV	0.0001	36	2016-09-18 04:54:00	2016-09-18 16:12:00	371	11.3	Pak38_B2	0.00402242
Pak38_B1_TS2	Pak38	B1	2	PaKiT01	MARV	0.001	36	2016-09-18 04:54:00	2016-09-18 16:14:00	1554	11.3333	Pak38_B1	0.0168486
Pak38_A1_TS3	Pak38	A1	3	PaKiT01	MARV	0.001	36	2016-09-18 04:54:00	2016-09-18 19:10:00	2184	14.2667	Pak38_A1	0.0236792
Pak38_A2_TS3	Pak38	A2	3	PaKiT01	MARV	0.0001	36	2016-09-18 04:54:00	2016-09-18 19:11:00	544	14.2833	Pak38_A2	0.00589811
Pak38_A3_TS3	Pak38	A3	3	PaKiT01	MARV	0.0001	36	2016-09-18 04:54:00	2016-09-18 19:13:00	726	14.3167	Pak38_A3	0.00787137
Pak38_B2_TS3	Pak38	B2	3	PaKiT01	MARV	0.0001	36	2016-09-18 04:54:00	2016-09-18 19:17:00	606	14.3833	Pak38_B2	0.00657032
Pak38_B1_TS3	Pak38	B1	3	PaKiT01	MARV	0.001	36	2016-09-18 04:54:00	2016-09-18 19:18:00	1971	14.4	Pak38_B1	0.0213698
Pak38_A1_TS4	Pak38	A1	4	PaKiT01	MARV	0.001	36	2016-09-18 04:54:00	2016-09-18 22:15:00	2470	17.35	Pak38_A1	0.02678
Pak38_A2_TS4	Pak38	A2	4	PaKiT01	MARV	0.0001	36	2016-09-18 04:54:00	2016-09-18 22:16:00	562	17.3667	Pak38_A2	0.00609326
Pak38_A3_TS4	Pak38	A3	4	PaKiT01	MARV	0.0001	36	2016-09-18 04:54:00	2016-09-18 22:17:00	691	17.3833	Pak38_A3	0.0074919
Pak38_B2_TS4	Pak38	B2	4	PaKiT01	MARV	0.0001	36	2016-09-18 04:54:00	2016-09-18 22:22:00	661	17.4667	Pak38_B2	0.00716663
Pak38_B1_TS4	Pak38	B1	4	PaKiT01	MARV	0.001	36	2016-09-18 04:54:00	2016-09-18 22:22:00	2096	17.4667	Pak38_B1	0.0227251
Pak38_A1_TS5	Pak38	A1	5	PaKiT01	MARV	0.001	36	2016-09-18 04:54:00	2016-09-19 09:57:00	1699	29.05	Pak38_A1	0.0184207
Pak38_A2_TS5	Pak38	A2	5	PaKiT01	MARV	0.0001	36	2016-09-18 04:54:00	2016-09-19 09:58:00	332	29.0667	Pak38_A2	0.00359958
Pak38_A3_TS5	Pak38	A3	5	PaKiT01	MARV	0.0001	36	2016-09-18 04:54:00	2016-09-19 09:59:00	407	29.0833	Pak38_A3	0.00441274
Pak38_B2_TS5	Pak38	B2	5	PaKiT01	MARV	0.0001	36	2016-09-18 04:54:00	2016-09-19 10:03:00	377	29.15	Pak38_B2	0.00408747
Pak38_B1_TS5	Pak38	B1	5	PaKiT01	MARV	0.001	36	2016-09-18 04:54:00	2016-09-19 10:04:00	1410	29.1667	Pak38_B1	0.0152874
Pak38_A1_TS6	Pak38	A1	6	PaKiT01	MARV	0.001	36	2016-09-18 04:54:00	2016-09-19 20:05:00	718	39.1833	Pak38_A1	0.00778463
Pak38_A2_TS6	Pak38	A2	6	PaKiT01	MARV	0.0001	36	2016-09-18 04:54:00	2016-09-19 20:06:00	149	39.2	Pak38_A2	0.00161547
Pak38_A3_TS6	Pak38	A3	6	PaKiT01	MARV	0.0001	36	2016-09-18 04:54:00	2016-09-19 20:07:00	244	39.2167	Pak38_A3	0.00264547
Pak38_B2_TS6	Pak38	B2	6	PaKiT01	MARV	0.0001	36	2016-09-18 04:54:00	2016-09-19 20:12:00	228	39.3	Pak38_B2	0.002472
Pak38_B1_TS6	Pak38	B1	6	PaKiT01	MARV	0.001	36	2016-09-18 04:54:00	2016-09-19 20:12:00	801	39.3	Pak38_B1	0.00868453
Pak38_A1_TS7	Pak38	A1	7	PaKiT01	MARV	0.001	36	2016-09-18 04:54:00	2016-09-20 09:58:00	417	53.0667	Pak38_A1	0.00452116
Pak38_A2_TS7	Pak38	A2	7	PaKiT01	MARV	0.0001	36	2016-09-18 04:54:00	2016-09-20 10:01:00	67	53.1167	Pak38_A2	0.000726421
Pak38_A3_TS7	Pak38	A3	7	PaKiT01	MARV	0.0001	36	2016-09-18 04:54:00	2016-09-20 10:04:00	162	53.1667	Pak38_A3	0.00175642
Pak38_B2_TS7	Pak38	B2	7	PaKiT01	MARV	0.0001	36	2016-09-18 04:54:00	2016-09-20 10:10:00	251	53.2667	Pak38_B2	0.00272137
Pak38_B1_TS7	Pak38	B1	7	PaKiT01	MARV	0.001	36	2016-09-18 04:54:00	2016-09-20 10:11:00	329	53.2833	Pak38_B1	0.00356705
Pak38_A1_TS8	Pak38	A1	8	PaKiT01	MARV	0.001	36	2016-09-18 04:54:00	2016-09-20 18:24:00	405	61.5	Pak38_A1	0.00439105
Pak38_A2_TS8	Pak38	A2	8	PaKiT01	MARV	0.0001	36	2016-09-18 04:54:00	2016-09-20 18:27:00	18	61.55	Pak38_A2	0.000195158
Pak38_A3_TS8	Pak38	A3	8	PaKiT01	MARV	0.0001	36	2016-09-18 04:54:00	2016-09-20 18:30:00	157	61.6	Pak38_A3	0.00170221
Pak38_B2_TS8	Pak38	B2	8	PaKiT01	MARV	0.0001	36	2016-09-18 04:54:00	2016-09-20 18:37:00	13	61.7167	Pak38_B2	0.000140947
Pak38_B1_TS8	Pak38	B1	8	PaKiT01	MARV	0.001	36	2016-09-18 04:54:00	2016-09-20 18:41:00	259	61.7833	Pak38_B1	0.00280811
Pak38_A1_TS9	Pak38	A1	9	PaKiT01	MARV	0.001	36	2016-09-18 04:54:00	2016-09-21 09:48:00	246	76.9	Pak38_A1	0.00266716
Pak38_A2_TS9	Pak38	A2	9	PaKiT01	MARV	0.0001	36	2016-09-18 04:54:00	2016-09-21 09:52:00	7	76.9667	Pak38_A2	7.58947e-05
Pak38_A3_TS9	Pak38	A3	9	PaKiT01	MARV	0.0001	36	2016-09-18 04:54:00	2016-09-21 09:55:00	17	77.0167	Pak38_A3	0.000184316
Pak38_B2_TS9	Pak38	B2	9	PaKiT01	MARV	0.0001	36	2016-09-18 04:54:00	2016-09-21 10:02:00	115	77.1333	Pak38_B2	0.00124684
Pak38_B1_TS9	Pak38	B1	9	PaKiT01	MARV	0.001	36	2016-09-18 04:54:00	2016-09-21 10:06:00	109	77.2	Pak38_B1	0.00118179
Pak38_A1_TS10	Pak38	A1	10	PaKiT01	MARV	0.001	36	2016-09-18 04:54:00	2016-09-21 17:54:00	188	85	Pak38_A1	0.00203832
Pak38_A2_TS10	Pak38	A2	10	PaKiT01	MARV	0.0001	36	2016-09-18 04:54:00	2016-09-21 17:57:00	233	85.05	Pak38_A2	0.00252621
Pak38_A3_TS10	Pak38	A3	10	PaKiT01	MARV	0.0001	36	2016-09-18 04:54:00	2016-09-21 18:00:00	186	85.1	Pak38_A3	0.00201663
Pak38_B2_TS10	Pak38	B2	10	PaKiT01	MARV	0.0001	36	2016-09-18 04:54:00	2016-09-21 18:06:00	97	85.2	Pak38_B2	0.00105168
Pak38_B1_TS10	Pak38	B1	10	PaKiT01	MARV	0.001	36	2016-09-18 04:54:00	2016-09-21 18:09:00	171	85.25	Pak38_B1	0.001854
Pak38_A1_TS11	Pak38	A1	11	PaKiT01	MARV	0.001	36	2016-09-18 04:54:00	2016-09-22 11:13:00	1	102.317	Pak38_A1	1.08421e-05
Pak38_A2_TS11	Pak38	A2	11	PaKiT01	MARV	0.0001	36	2016-09-18 04:54:00	2016-09-22 11:16:00	46	102.367	Pak38_A2	0.000498737
Pak38_A3_TS11	Pak38	A3	11	PaKiT01	MARV	0.0001	36	2016-09-18 04:54:00	2016-09-22 11:20:00	252	102.433	Pak38_A3	0.00273221
Pak38_B2_TS11	Pak38	B2	11	PaKiT01	MARV	0.0001	36	2016-09-18 04:54:00	2016-09-22 11:27:00	73	102.55	Pak38_B2	0.000791474
Pak38_B1_TS11	Pak38	B1	11	PaKiT01	MARV	0.001	36	2016-09-18 04:54:00	2016-09-22 11:30:00	559	102.6	Pak38_B1	0.00606074
Pak38_A1_TS12	Pak38	A1	12	PaKiT01	MARV	0.001	36	2016-09-18 04:54:00	2016-09-22 19:32:00	74	110.633	Pak38_A1	0.000802316
Pak38_A2_TS12	Pak38	A2	12	PaKiT01	MARV	0.0001	36	2016-09-18 04:54:00	2016-09-22 19:34:00	141	110.667	Pak38_A2	0.00152874
Pak38_A3_TS12	Pak38	A3	12	PaKiT01	MARV	0.0001	36	2016-09-18 04:54:00	2016-09-22 19:36:00	177	110.7	Pak38_A3	0.00191905
Pak38_B2_TS12	Pak38	B2	12	PaKiT01	MARV	0.0001	36	2016-09-18 04:54:00	2016-09-22 19:42:00	11	110.8	Pak38_B2	0.000119263
Pak38_B1_TS12	Pak38	B1	12	PaKiT01	MARV	0.001	36	2016-09-18 04:54:00	2016-09-22 19:45:00	130	110.85	Pak38_B1	0.00140947
Pak4_A1_TS1	Pak4	A1	1	PaKiT01	EBOV	0.0001	64	2016-07-24 20:55:00	2016-07-25 07:50:00	403	10.9167	Pak4_A1	0.00436937
Pak4_A3_TS1	Pak4	A3	1	PaKiT01	EBOV	0.001	64	2016-07-24 20:55:00	2016-07-25 07:58:00	2853	11.05	Pak4_A3	0.0309325
Pak4_B1_TS1	Pak4	B1	1	PaKiT01	EBOV	0.0001	64	2016-07-24 20:55:00	2016-07-25 08:10:00	611	11.25	Pak4_B1	0.00662453
Pak4_A1_TS2	Pak4	A1	2	PaKiT01	EBOV	0.0001	64	2016-07-24 20:55:00	2016-07-25 11:20:00	930	14.4167	Pak4_A1	0.0100832
Pak4_A3_TS2	Pak4	A3	2	PaKiT01	EBOV	0.001	64	2016-07-24 20:55:00	2016-07-25 11:24:00	3430	14.4833	Pak4_A3	0.0371884
Pak4_B1_TS2	Pak4	B1	2	PaKiT01	EBOV	0.0001	64	2016-07-24 20:55:00	2016-07-25 11:38:00	977	14.7167	Pak4_B1	0.0105927
Pak4_A1_TS3	Pak4	A1	3	PaKiT01	EBOV	0.0001	64	2016-07-24 20:55:00	2016-07-25 14:26:00	1139	17.5167	Pak4_A1	0.0123492
Pak4_A3_TS3	Pak4	A3	3	PaKiT01	EBOV	0.001	64	2016-07-24 20:55:00	2016-07-25 14:32:00	4776	17.6167	Pak4_A3	0.0517819
Pak4_B1_TS3	Pak4	B1	3	PaKiT01	EBOV	0.0001	64	2016-07-24 20:55:00	2016-07-25 14:42:00	1241	17.7833	Pak4_B1	0.0134551
Pak4_A1_TS4	Pak4	A1	4	PaKiT01	EBOV	0.0001	64	2016-07-24 20:55:00	2016-07-25 20:37:00	617	23.7	Pak4_A1	0.00668958
Pak4_A3_TS4	Pak4	A3	4	PaKiT01	EBOV	0.001	64	2016-07-24 20:55:00	2016-07-25 20:42:00	2860	23.7833	Pak4_A3	0.0310084
Pak4_B1_TS4	Pak4	B1	4	PaKiT01	EBOV	0.0001	64	2016-07-24 20:55:00	2016-07-25 20:56:00	770	24.0167	Pak4_B1	0.00834842
Pak4_A1_TS5	Pak4	A1	5	PaKiT01	EBOV	0.0001	64	2016-07-24 20:55:00	2016-07-26 09:49:00	769	36.9	Pak4_A1	0.00833758
Pak4_A3_TS5	Pak4	A3	5	PaKiT01	EBOV	0.001	64	2016-07-24 20:55:00	2016-07-26 09:55:00	2590	37	Pak4_A3	0.0280811
Pak4_B1_TS5	Pak4	B1	5	PaKiT01	EBOV	0.0001	64	2016-07-24 20:55:00	2016-07-26 10:10:00	913	37.25	Pak4_B1	0.00989884
Pak4_A1_TS6	Pak4	A1	6	PaKiT01	EBOV	0.0001	64	2016-07-24 20:55:00	2016-07-26 19:27:00	3565	46.5333	Pak4_A1	0.0386521
Pak4_A3_TS6	Pak4	A3	6	PaKiT01	EBOV	0.001	64	2016-07-24 20:55:00	2016-07-26 19:30:00	8263	46.5833	Pak4_A3	0.0895883
Pak4_B1_TS6	Pak4	B1	6	PaKiT01	EBOV	0.0001	64	2016-07-24 20:55:00	2016-07-26 19:40:00	4350	46.75	Pak4_B1	0.0471632
Pak4_A1_TS7	Pak4	A1	7	PaKiT01	EBOV	0.0001	64	2016-07-24 20:55:00	2016-07-27 08:40:00	3493	59.75	Pak4_A1	0.0378715
Pak4_A3_TS7	Pak4	A3	7	PaKiT01	EBOV	0.001	64	2016-07-24 20:55:00	2016-07-27 08:44:00	6827	59.8167	Pak4_A3	0.0740191
Pak4_B1_TS7	Pak4	B1	7	PaKiT01	EBOV	0.0001	64	2016-07-24 20:55:00	2016-07-27 08:52:00	5186	59.95	Pak4_B1	0.0562272
Pak4_A1_TS8	Pak4	A1	8	PaKiT01	EBOV	0.0001	64	2016-07-24 20:55:00	2016-07-27 18:25:00	4744	69.5	Pak4_A1	0.051435
Pak4_A3_TS8	Pak4	A3	8	PaKiT01	EBOV	0.001	64	2016-07-24 20:55:00	2016-07-27 18:29:00	6219	69.5667	Pak4_A3	0.0674271
Pak4_B1_TS8	Pak4	B1	8	PaKiT01	EBOV	0.0001	64	2016-07-24 20:55:00	2016-07-27 18:36:00	7232	69.6833	Pak4_B1	0.0784101
Pak4_A1_TS9	Pak4	A1	9	PaKiT01	EBOV	0.0001	64	2016-07-24 20:55:00	2016-07-28 08:24:00	4821	83.4833	Pak4_A1	0.0522698
Pak4_A3_TS9	Pak4	A3	9	PaKiT01	EBOV	0.001	64	2016-07-24 20:55:00	2016-07-28 08:28:00	6295	83.55	Pak4_A3	0.0682511
Pak4_B1_TS9	Pak4	B1	9	PaKiT01	EBOV	0.0001	64	2016-07-24 20:55:00	2016-07-28 08:37:00	7532	83.7	Pak4_B1	0.0816627
Pak4_A1_TS10	Pak4	A1	10	PaKiT01	EBOV	0.0001	64	2016-07-24 20:55:00	2016-07-28 19:53:00	5432	94.9667	Pak4_A1	0.0588943
Pak4_A3_TS10	Pak4	A3	10	PaKiT01	EBOV	0.001	64	2016-07-24 20:55:00	2016-07-28 19:56:00	6533	95.0167	Pak4_A3	0.0708315
Pak4_B1_TS10	Pak4	B1	10	PaKiT01	EBOV	0.0001	64	2016-07-24 20:55:00	2016-07-28 20:05:00	8854	95.1667	Pak4_B1	0.095996
Pak4_A1_TS11	Pak4	A1	11	PaKiT01	EBOV	0.0001	64	2016-07-24 20:55:00	2016-07-29 08:23:00	4824	107.467	Pak4_A1	0.0523023
Pak4_A3_TS11	Pak4	A3	11	PaKiT01	EBOV	0.001	64	2016-07-24 20:55:00	2016-07-29 08:27:00	6286	107.533	Pak4_A3	0.0681535
Pak4_B1_TS11	Pak4	B1	11	PaKiT01	EBOV	0.0001	64	2016-07-24 20:55:00	2016-07-29 08:52:00	7089	107.95	Pak4_B1	0.0768597
Pak4_A1_TS12	Pak4	A1	12	PaKiT01	EBOV	0.0001	64	2016-07-24 20:55:00	2016-07-29 19:06:00	4281	118.183	Pak4_A1	0.0464151
Pak4_A3_TS12	Pak4	A3	12	PaKiT01	EBOV	0.001	64	2016-07-24 20:55:00	2016-07-29 19:10:00	5530	118.25	Pak4_A3	0.0599568
Pak4_B1_TS12	Pak4	B1	12	PaKiT01	EBOV	0.0001	64	2016-07-24 20:55:00	2016-07-29 19:20:00	5676	118.417	Pak4_B1	0.0615398
Pak4_A1_TS13	Pak4	A1	13	PaKiT01	EBOV	0.0001	64	2016-07-24 20:55:00	2016-07-30 11:14:00	3886	134.317	Pak4_A1	0.0421324
Pak4_A3_TS13	Pak4	A3	13	PaKiT01	EBOV	0.001	64	2016-07-24 20:55:00	2016-07-30 11:19:00	4763	134.4	Pak4_A3	0.051641
Pak4_B1_TS13	Pak4	B1	13	PaKiT01	EBOV	0.0001	64	2016-07-24 20:55:00	2016-07-30 11:26:00	4690	134.517	Pak4_B1	0.0508495
Pak4_A1_TS14	Pak4	A1	14	PaKiT01	EBOV	0.0001	64	2016-07-24 20:55:00	2016-07-30 19:10:00	3812	142.25	Pak4_A1	0.0413301
Pak4_A3_TS14	Pak4	A3	14	PaKiT01	EBOV	0.001	64	2016-07-24 20:55:00	2016-07-30 19:15:00	4588	142.333	Pak4_A3	0.0497436
Pak4_B1_TS14	Pak4	B1	14	PaKiT01	EBOV	0.0001	64	2016-07-24 20:55:00	2016-07-30 19:25:00	4310	142.5	Pak4_B1	0.0467295
Pak4_A1_TS15	Pak4	A1	15	PaKiT01	EBOV	0.0001	64	2016-07-24 20:55:00	2016-07-31 14:05:00	3416	161.167	Pak4_A1	0.0370366
Pak4_A3_TS15	Pak4	A3	15	PaKiT01	EBOV	0.001	64	2016-07-24 20:55:00	2016-07-31 14:10:00	3919	161.25	Pak4_A3	0.0424902
Pak4_B1_TS15	Pak4	B1	15	PaKiT01	EBOV	0.0001	64	2016-07-24 20:55:00	2016-07-31 14:21:00	3818	161.433	Pak4_B1	0.0413952
Pak4_A1_TS16	Pak4	A1	16	PaKiT01	EBOV	0.0001	64	2016-07-24 20:55:00	2016-08-01 08:35:00	2962	179.667	Pak4_A1	0.0321143
Pak4_A3_TS16	Pak4	A3	16	PaKiT01	EBOV	0.001	64	2016-07-24 20:55:00	2016-08-01 08:40:00	3447	179.75	Pak4_A3	0.0373727
Pak4_B1_TS16	Pak4	B1	16	PaKiT01	EBOV	0.0001	64	2016-07-24 20:55:00	2016-08-01 08:50:00	2963	179.917	Pak4_B1	0.0321252
Pak4_A1_TS17	Pak4	A1	17	PaKiT01	EBOV	0.0001	64	2016-07-24 20:55:00	2016-08-01 18:06:00	2836	189.183	Pak4_A1	0.0307482
Pak4_A3_TS17	Pak4	A3	17	PaKiT01	EBOV	0.001	64	2016-07-24 20:55:00	2016-08-01 18:10:00	3099	189.25	Pak4_A3	0.0335997
Pak4_B1_TS17	Pak4	B1	17	PaKiT01	EBOV	0.0001	64	2016-07-24 20:55:00	2016-08-01 18:19:00	2794	189.4	Pak4_B1	0.0302928
Pak4_A1_TS18	Pak4	A1	18	PaKiT01	EBOV	0.0001	64	2016-07-24 20:55:00	2016-08-02 11:05:00	2255	206.167	Pak4_A1	0.0244489
Pak4_A3_TS18	Pak4	A3	18	PaKiT01	EBOV	0.001	64	2016-07-24 20:55:00	2016-08-02 11:09:00	2660	206.233	Pak4_A3	0.02884
Pak4_B1_TS18	Pak4	B1	18	PaKiT01	EBOV	0.0001	64	2016-07-24 20:55:00	2016-08-02 11:18:00	2343	206.383	Pak4_B1	0.0254031
Pak4_A1_TS19	Pak4	A1	19	PaKiT01	EBOV	0.0001	64	2016-07-24 20:55:00	2016-08-02 18:45:00	2061	213.833	Pak4_A1	0.0223456
Pak4_A3_TS19	Pak4	A3	19	PaKiT01	EBOV	0.001	64	2016-07-24 20:55:00	2016-08-02 18:49:00	2537	213.9	Pak4_A3	0.0275064
Pak4_B1_TS19	Pak4	B1	19	PaKiT01	EBOV	0.0001	64	2016-07-24 20:55:00	2016-08-02 19:00:00	2182	214.083	Pak4_B1	0.0236575
Pak5_A1_TS1	Pak5	A1	1	PaKiT01	EBOV	0.001	64	2016-08-01 17:35:00	2016-08-02 05:39:00	2321	12.0667	Pak5_A1	0.0251645
Pak5_A2_TS1	Pak5	A2	1	PaKiT01	EBOV	0.0001	64	2016-08-01 17:35:00	2016-08-02 05:41:00	538	12.1	Pak5_A2	0.00583305
Pak5_B2_TS1	Pak5	B2	1	PaKiT01	EBOV	0.0001	64	2016-08-01 17:35:00	2016-08-02 05:58:00	493	12.3833	Pak5_B2	0.00534516
Pak5_B1_TS1	Pak5	B1	1	PaKiT01	EBOV	0.001	64	2016-08-01 17:35:00	2016-08-02 06:00:00	2414	12.4167	Pak5_B1	0.0261728
Pak5_A1_TS2	Pak5	A1	2	PaKiT01	EBOV	0.001	64	2016-08-01 17:35:00	2016-08-02 09:19:00	2678	15.7333	Pak5_A1	0.0290352
Pak5_A2_TS2	Pak5	A2	2	PaKiT01	EBOV	0.0001	64	2016-08-01 17:35:00	2016-08-02 09:21:00	784	15.7667	Pak5_A2	0.00850021
Pak5_B2_TS2	Pak5	B2	2	PaKiT01	EBOV	0.0001	64	2016-08-01 17:35:00	2016-08-02 09:32:00	849	15.95	Pak5_B2	0.00920495
Pak5_B1_TS2	Pak5	B1	2	PaKiT01	EBOV	0.001	64	2016-08-01 17:35:00	2016-08-02 09:34:00	2995	15.9833	Pak5_B1	0.0324721
Pak5_A1_TS3	Pak5	A1	3	PaKiT01	EBOV	0.001	64	2016-08-01 17:35:00	2016-08-02 13:05:00	3454	19.5	Pak5_A1	0.0374486
Pak5_A2_TS3	Pak5	A2	3	PaKiT01	EBOV	0.0001	64	2016-08-01 17:35:00	2016-08-02 13:10:00	854	19.5833	Pak5_A2	0.00925916
Pak5_B1_TS3	Pak5	B1	3	PaKiT01	EBOV	0.001	64	2016-08-01 17:35:00	2016-08-02 13:22:00	3822	19.7833	Pak5_B1	0.0414385
Pak5_B2_TS3	Pak5	B2	3	PaKiT01	EBOV	0.0001	64	2016-08-01 17:35:00	2016-08-02 13:20:00	967	19.75	Pak5_B2	0.0104843
Pak5_A1_TS4	Pak5	A1	4	PaKiT01	EBOV	0.001	64	2016-08-01 17:35:00	2016-08-02 17:01:00	4083	23.4333	Pak5_A1	0.0442683
Pak5_A2_TS4	Pak5	A2	4	PaKiT01	EBOV	0.0001	64	2016-08-01 17:35:00	2016-08-02 17:02:00	1088	23.45	Pak5_A2	0.0117962
Pak5_B1_TS4	Pak5	B1	4	PaKiT01	EBOV	0.001	64	2016-08-01 17:35:00	2016-08-02 17:16:00	4901	23.6833	Pak5_B1	0.0531372
Pak5_B2_TS4	Pak5	B2	4	PaKiT01	EBOV	0.0001	64	2016-08-01 17:35:00	2016-08-02 17:15:00	1251	23.6667	Pak5_B2	0.0135635
Pak5_A1_TS5	Pak5	A1	5	PaKiT01	EBOV	0.001	64	2016-08-01 17:35:00	2016-08-02 20:01:00	4368	26.4333	Pak5_A1	0.0473583
Pak5_A2_TS5	Pak5	A2	5	PaKiT01	EBOV	0.0001	64	2016-08-01 17:35:00	2016-08-02 20:03:00	1177	26.4667	Pak5_A2	0.0127612
Pak5_B2_TS5	Pak5	B2	5	PaKiT01	EBOV	0.0001	64	2016-08-01 17:35:00	2016-08-02 20:13:00	1410	26.6333	Pak5_B2	0.0152874
Pak5_B1_TS5	Pak5	B1	5	PaKiT01	EBOV	0.001	64	2016-08-01 17:35:00	2016-08-02 20:14:00	5369	26.65	Pak5_B1	0.0582113
Pak5_A1_TS6	Pak5	A1	6	PaKiT01	EBOV	0.001	64	2016-08-01 17:35:00	2016-08-02 22:07:00	4597	28.5333	Pak5_A1	0.0498412
Pak5_A2_TS6	Pak5	A2	6	PaKiT01	EBOV	0.0001	64	2016-08-01 17:35:00	2016-08-02 22:08:00	1190	28.55	Pak5_A2	0.0129021
Pak5_B2_TS6	Pak5	B2	6	PaKiT01	EBOV	0.0001	64	2016-08-01 17:35:00	2016-08-02 22:19:00	1473	28.7333	Pak5_B2	0.0159704
Pak5_B1_TS6	Pak5	B1	6	PaKiT01	EBOV	0.001	64	2016-08-01 17:35:00	2016-08-02 22:20:00	5309	28.75	Pak5_B1	0.0575607
Pak5_A1_TS7	Pak5	A1	7	PaKiT01	EBOV	0.001	64	2016-08-01 17:35:00	2016-08-03 00:04:00	4366	30.4833	Pak5_A1	0.0473366
Pak5_A2_TS7	Pak5	A2	7	PaKiT01	EBOV	0.0001	64	2016-08-01 17:35:00	2016-08-03 00:04:00	1132	30.4833	Pak5_A2	0.0122733
Pak5_B2_TS7	Pak5	B2	7	PaKiT01	EBOV	0.0001	64	2016-08-01 17:35:00	2016-08-03 00:15:00	1381	30.6667	Pak5_B2	0.0149729
Pak5_B1_TS7	Pak5	B1	7	PaKiT01	EBOV	0.001	64	2016-08-01 17:35:00	2016-08-03 00:15:00	5478	30.6667	Pak5_B1	0.0593931
Pak5_A1_TS8	Pak5	A1	8	PaKiT01	EBOV	0.001	64	2016-08-01 17:35:00	2016-08-03 02:10:00	4089	32.5833	Pak5_A1	0.0443334
Pak5_A2_TS8	Pak5	A2	8	PaKiT01	EBOV	0.0001	64	2016-08-01 17:35:00	2016-08-03 02:11:00	1176	32.6	Pak5_A2	0.0127503
Pak5_B2_TS8	Pak5	B2	8	PaKiT01	EBOV	0.0001	64	2016-08-01 17:35:00	2016-08-03 02:23:00	1382	32.8	Pak5_B2	0.0149838
Pak5_B1_TS8	Pak5	B1	8	PaKiT01	EBOV	0.001	64	2016-08-01 17:35:00	2016-08-03 02:25:00	5199	32.8333	Pak5_B1	0.0563681
Pak5_A1_TS9	Pak5	A1	9	PaKiT01	EBOV	0.001	64	2016-08-01 17:35:00	2016-08-03 10:59:00	3237	41.4	Pak5_A1	0.0350959
Pak5_A2_TS9	Pak5	A2	9	PaKiT01	EBOV	0.0001	64	2016-08-01 17:35:00	2016-08-03 11:00:00	834	41.4167	Pak5_A2	0.00904232
Pak5_B2_TS9	Pak5	B2	9	PaKiT01	EBOV	0.0001	64	2016-08-01 17:35:00	2016-08-03 11:14:00	1047	41.65	Pak5_B2	0.0113517
Pak5_B1_TS9	Pak5	B1	9	PaKiT01	EBOV	0.001	64	2016-08-01 17:35:00	2016-08-03 11:15:00	4116	41.6667	Pak5_B1	0.0446261
Pak5_A1_TS10	Pak5	A1	10	PaKiT01	EBOV	0.001	64	2016-08-01 17:35:00	2016-08-03 16:23:00	2902	46.8	Pak5_A1	0.0314638
Pak5_A2_TS10	Pak5	A2	10	PaKiT01	EBOV	0.0001	64	2016-08-01 17:35:00	2016-08-03 16:25:00	761	46.8333	Pak5_A2	0.00825084
Pak5_B2_TS10	Pak5	B2	10	PaKiT01	EBOV	0.0001	64	2016-08-01 17:35:00	2016-08-03 16:35:00	966	47	Pak5_B2	0.0104735
Pak5_B1_TS10	Pak5	B1	10	PaKiT01	EBOV	0.001	64	2016-08-01 17:35:00	2016-08-03 16:36:00	3455	47.0167	Pak5_B1	0.0374595
Pak5_A1_TS11	Pak5	A1	11	PaKiT01	EBOV	0.001	64	2016-08-01 17:35:00	2016-08-04 08:05:00	2315	62.5	Pak5_A1	0.0250995
Pak5_A2_TS11	Pak5	A2	11	PaKiT01	EBOV	0.0001	64	2016-08-01 17:35:00	2016-08-04 08:06:00	1053	62.5167	Pak5_A2	0.0114167
Pak5_B2_TS11	Pak5	B2	11	PaKiT01	EBOV	0.0001	64	2016-08-01 17:35:00	2016-08-04 08:19:00	991	62.7333	Pak5_B2	0.0107445
Pak5_B1_TS11	Pak5	B1	11	PaKiT01	EBOV	0.001	64	2016-08-01 17:35:00	2016-08-04 08:21:00	3039	62.7667	Pak5_B1	0.0329492
Pak5_A1_TS12	Pak5	A1	12	PaKiT01	EBOV	0.001	64	2016-08-01 17:35:00	2016-08-05 08:13:00	3058	86.6333	Pak5_A1	0.0331552
Pak5_A2_TS12	Pak5	A2	12	PaKiT01	EBOV	0.0001	64	2016-08-01 17:35:00	2016-08-05 08:14:00	1260	86.65	Pak5_A2	0.0136611
Pak5_B2_TS12	Pak5	B2	12	PaKiT01	EBOV	0.0001	64	2016-08-01 17:35:00	2016-08-05 08:24:00	1400	86.8167	Pak5_B2	0.0151789
Pak5_B1_TS12	Pak5	B1	12	PaKiT01	EBOV	0.001	64	2016-08-01 17:35:00	2016-08-05 08:25:00	3444	86.8333	Pak5_B1	0.0373402
Pak7_A1_TS1	Pak7	A1	1	PaKiT01	EBOV	0.001	64	2016-08-10 05:40:00	2016-08-10 12:04:00	1098	6.4	Pak7_A1	0.0119046
Pak7_A2_TS1	Pak7	A2	1	PaKiT01	EBOV	0.0001	64	2016-08-10 05:40:00	2016-08-10 12:05:00	1221	6.41667	Pak7_A2	0.0132382
Pak7_A3_TS1	Pak7	A3	1	PaKiT01	EBOV	0.001	64	2016-08-10 05:40:00	2016-08-10 12:06:00	6379	6.43333	Pak7_A3	0.0691618
Pak7_B2_TS1	Pak7	B2	1	PaKiT01	EBOV	0.0001	64	2016-08-10 05:40:00	2016-08-10 12:15:00	1030	6.58333	Pak7_B2	0.0111674
Pak7_B1_TS0	Pak7	B1	0	PaKiT01	EBOV	0.001	64	2016-08-10 05:40:00	2016-08-10 11:57:00	1108	6.28333	Pak7_B1	0.0120131
Pak7_B1_TS1	Pak7	B1	2	PaKiT01	EBOV	0.001	64	2016-08-10 05:40:00	2016-08-10 12:16:00	NA	6.6	Pak7_B1	NA
Pak7_A1_TS0	Pak7	A1	0	PaKiT01	EBOV	0.001	64	2016-08-10 05:40:00	2016-08-10 11:54:00	1153	6.23333	Pak7_A1	0.0125009
Pak7_A1_TS2	Pak7	A1	2	PaKiT01	EBOV	0.001	36	2016-08-10 05:40:00	2016-08-10 14:05:00	5253	8.41667	Pak7_A1	0.0569536
Pak7_A2_TS2	Pak7	A2	2	PaKiT01	EBOV	0.0001	36	2016-08-10 05:40:00	2016-08-10 14:07:00	13538	8.45	Pak7_A2	0.14678
Pak7_A3_TS2	Pak7	A3	2	PaKiT01	EBOV	0.001	36	2016-08-10 05:40:00	2016-08-10 14:09:00	4144	8.48333	Pak7_A3	0.0449297
Pak7_B2_TS2	Pak7	B2	2	PaKiT01	EBOV	0.0001	36	2016-08-10 05:40:00	2016-08-10 14:12:00	7586	8.53333	Pak7_B2	0.0822482
Pak7_B1_TS2	Pak7	B1	2	PaKiT01	EBOV	0.001	36	2016-08-10 05:40:00	2016-08-10 14:14:00	3560	8.56667	Pak7_B1	0.0385979
Pak7_A1_TS3	Pak7	A1	3	PaKiT01	EBOV	0.001	36	2016-08-10 05:40:00	2016-08-10 15:49:00	3113	10.15	Pak7_A1	0.0337515
Pak7_A2_TS3	Pak7	A2	3	PaKiT01	EBOV	0.0001	36	2016-08-10 05:40:00	2016-08-10 15:51:00	1456	10.1833	Pak7_A2	0.0157861
Pak7_A3_TS3	Pak7	A3	3	PaKiT01	EBOV	0.001	36	2016-08-10 05:40:00	2016-08-10 15:53:00	5687	10.2167	Pak7_A3	0.0616591
Pak7_B2_TS3	Pak7	B2	3	PaKiT01	EBOV	0.0001	36	2016-08-10 05:40:00	2016-08-10 16:01:00	1350	10.35	Pak7_B2	0.0146368
Pak7_B1_TS3	Pak7	B1	3	PaKiT01	EBOV	0.001	36	2016-08-10 05:40:00	2016-08-10 16:03:00	5054	10.3833	Pak7_B1	0.054796
Pak7_A1_TS4	Pak7	A1	4	PaKiT01	EBOV	0.001	36	2016-08-10 05:40:00	2016-08-10 18:16:00	3779	12.6	Pak7_A1	0.0409723
Pak7_A2_TS4	Pak7	A2	4	PaKiT01	EBOV	0.0001	36	2016-08-10 05:40:00	2016-08-10 18:17:00	1821	12.6167	Pak7_A2	0.0197435
Pak7_A3_TS4	Pak7	A3	4	PaKiT01	EBOV	0.001	36	2016-08-10 05:40:00	2016-08-10 18:19:00	7854	12.65	Pak7_A3	0.0851539
Pak7_B2_TS4	Pak7	B2	4	PaKiT01	EBOV	0.0001	36	2016-08-10 05:40:00	2016-08-10 18:21:00	1574	12.6833	Pak7_B2	0.0170655
Pak7_B1_TS4	Pak7	B1	4	PaKiT01	EBOV	0.001	36	2016-08-10 05:40:00	2016-08-10 18:22:00	6429	12.7	Pak7_B1	0.0697039
Pak7_A1_TS5	Pak7	A1	5	PaKiT01	EBOV	0.001	36	2016-08-10 05:40:00	2016-08-10 20:07:00	4011	14.45	Pak7_A1	0.0434877
Pak7_A2_TS5	Pak7	A2	5	PaKiT01	EBOV	0.0001	36	2016-08-10 05:40:00	2016-08-10 20:08:00	1951	14.4667	Pak7_A2	0.0211529
Pak7_A3_TS5	Pak7	A3	5	PaKiT01	EBOV	0.001	36	2016-08-10 05:40:00	2016-08-10 20:08:00	9105	14.4667	Pak7_A3	0.0987174
Pak7_B2_TS5	Pak7	B2	5	PaKiT01	EBOV	0.0001	36	2016-08-10 05:40:00	2016-08-10 20:16:00	1757	14.6	Pak7_B2	0.0190496
Pak7_B1_TS5	Pak7	B1	5	PaKiT01	EBOV	0.001	36	2016-08-10 05:40:00	2016-08-10 20:17:00	7100	14.6167	Pak7_B1	0.076979
Pak7_A1_TS6	Pak7	A1	6	PaKiT01	EBOV	0.001	36	2016-08-10 05:40:00	2016-08-10 21:41:00	4199	16.0167	Pak7_A1	0.045526
Pak7_A2_TS6	Pak7	A2	6	PaKiT01	EBOV	0.0001	36	2016-08-10 05:40:00	2016-08-10 21:42:00	1889	16.0333	Pak7_A2	0.0204807
Pak7_A3_TS6	Pak7	A3	6	PaKiT01	EBOV	0.001	36	2016-08-10 05:40:00	2016-08-10 21:43:00	9339	16.05	Pak7_A3	0.101254
Pak7_B2_TS6	Pak7	B2	6	PaKiT01	EBOV	0.0001	36	2016-08-10 05:40:00	2016-08-10 21:46:00	1673	16.1	Pak7_B2	0.0181388
Pak7_B1_TS6	Pak7	B1	6	PaKiT01	EBOV	0.001	36	2016-08-10 05:40:00	2016-08-10 21:47:00	7462	16.1167	Pak7_B1	0.0809038
Pak7_A1_TS7	Pak7	A1	7	PaKiT01	EBOV	0.001	36	2016-08-10 05:40:00	2016-08-10 22:57:00	4217	17.2833	Pak7_A1	0.0457212
Pak7_A2_TS7	Pak7	A2	7	PaKiT01	EBOV	0.0001	36	2016-08-10 05:40:00	2016-08-10 22:58:00	1836	17.3	Pak7_A2	0.0199061
Pak7_A3_TS7	Pak7	A3	7	PaKiT01	EBOV	0.001	36	2016-08-10 05:40:00	2016-08-10 22:58:00	9364	17.3	Pak7_A3	0.101525
Pak7_B2_TS7	Pak7	B2	7	PaKiT01	EBOV	0.0001	36	2016-08-10 05:40:00	2016-08-10 23:02:00	1599	17.3667	Pak7_B2	0.0173365
Pak7_B1_TS7	Pak7	B1	7	PaKiT01	EBOV	0.001	36	2016-08-10 05:40:00	2016-08-10 23:02:00	7558	17.3667	Pak7_B1	0.0819446
Pak7_A1_TS8	Pak7	A1	8	PaKiT01	EBOV	0.001	36	2016-08-10 05:40:00	2016-08-11 08:03:00	2842	26.3833	Pak7_A1	0.0308133
Pak7_A2_TS8	Pak7	A2	8	PaKiT01	EBOV	0.0001	36	2016-08-10 05:40:00	2016-08-11 08:03:00	1694	26.3833	Pak7_A2	0.0183665
Pak7_A3_TS8	Pak7	A3	8	PaKiT01	EBOV	0.001	36	2016-08-10 05:40:00	2016-08-11 08:04:00	7762	26.4	Pak7_A3	0.0841564
Pak7_B2_TS8	Pak7	B2	8	PaKiT01	EBOV	0.0001	36	2016-08-10 05:40:00	2016-08-11 08:08:00	1432	26.4667	Pak7_B2	0.0155259
Pak7_B1_TS8	Pak7	B1	8	PaKiT01	EBOV	0.001	36	2016-08-10 05:40:00	2016-08-11 08:08:00	6160	26.4667	Pak7_B1	0.0667874
Pak7_A1_TS9	Pak7	A1	9	PaKiT01	EBOV	0.001	36	2016-08-10 05:40:00	2016-08-11 19:47:00	1365	38.1167	Pak7_A1	0.0147995
Pak7_A2_TS9	Pak7	A2	9	PaKiT01	EBOV	0.0001	36	2016-08-10 05:40:00	2016-08-11 19:48:00	1296	38.1333	Pak7_A2	0.0140514
Pak7_A3_TS9	Pak7	A3	9	PaKiT01	EBOV	0.001	36	2016-08-10 05:40:00	2016-08-11 19:49:00	5345	38.15	Pak7_A3	0.0579511
Pak7_B2_TS9	Pak7	B2	9	PaKiT01	EBOV	0.0001	36	2016-08-10 05:40:00	2016-08-11 19:54:00	1274	38.2333	Pak7_B2	0.0138128
Pak7_B1_TS9	Pak7	B1	9	PaKiT01	EBOV	0.001	36	2016-08-10 05:40:00	2016-08-11 19:55:00	3718	38.25	Pak7_B1	0.040311
Pak8_A1_TS1	Pak8	A1	1	PaKiT01	EBOV	0.001	36	2016-08-10 05:40:00	2016-08-10 12:22:00	995	6.7	Pak8_A1	0.0107879
Pak8_A2_TS1	Pak8	A2	1	PaKiT01	EBOV	0.0001	36	2016-08-10 05:40:00	2016-08-10 12:25:00	29	6.75	Pak8_A2	0.000314421
Pak8_A3_TS1	Pak8	A3	1	PaKiT01	EBOV	0.001	36	2016-08-10 05:40:00	2016-08-10 12:27:00	1408	6.78333	Pak8_A3	0.0152657
Pak8_B2_TS1	Pak8	B2	1	PaKiT01	EBOV	0.0001	36	2016-08-10 05:40:00	2016-08-10 12:33:00	0	6.88333	Pak8_B2	0
Pak8_B1_TS1	Pak8	B1	1	PaKiT01	EBOV	0.001	36	2016-08-10 05:40:00	2016-08-10 12:34:00	1001	6.9	Pak8_B1	0.0108529
Pak8_A1_TS2	Pak8	A1	2	PaKiT01	EBOV	0.001	36	2016-08-10 05:40:00	2016-08-10 14:17:00	3204	8.61667	Pak8_A1	0.0347381
Pak8_A2_TS2	Pak8	A2	2	PaKiT01	EBOV	0.0001	36	2016-08-10 05:40:00	2016-08-10 14:18:00	564	8.63333	Pak8_A2	0.00611495
Pak8_A3_TS2	Pak8	A3	2	PaKiT01	EBOV	0.001	36	2016-08-10 05:40:00	2016-08-10 14:19:00	3467	8.65	Pak8_A3	0.0375896
Pak8_B2_TS2	Pak8	B2	2	PaKiT01	EBOV	0.0001	36	2016-08-10 05:40:00	2016-08-10 14:24:00	665	8.73333	Pak8_B2	0.00721
Pak8_B1_TS2	Pak8	B1	2	PaKiT01	EBOV	0.001	36	2016-08-10 05:40:00	2016-08-10 14:26:00	3316	8.76667	Pak8_B1	0.0359524
Pak8_A1_TS3	Pak8	A1	3	PaKiT01	EBOV	0.001	36	2016-08-10 05:40:00	2016-08-10 16:05:00	4541	10.4167	Pak8_A1	0.049234
Pak8_A2_TS3	Pak8	A2	3	PaKiT01	EBOV	0.0001	36	2016-08-10 05:40:00	2016-08-10 16:06:00	942	10.4333	Pak8_A2	0.0102133
Pak8_A3_TS3	Pak8	A3	3	PaKiT01	EBOV	0.001	36	2016-08-10 05:40:00	2016-08-10 16:07:00	4955	10.45	Pak8_A3	0.0537226
Pak8_B2_TS3	Pak8	B2	3	PaKiT01	EBOV	0.0001	36	2016-08-10 05:40:00	2016-08-10 16:10:00	1184	10.5	Pak8_B2	0.0128371
Pak8_B1_TS3	Pak8	B1	3	PaKiT01	EBOV	0.001	36	2016-08-10 05:40:00	2016-08-10 16:11:00	4830	10.5167	Pak8_B1	0.0523674
Pak9_A1_TS1	Pak9	A1	1	PaKiT01	EBOV	0.001	36	2016-08-10 05:40:00	2016-08-10 13:07:00	1137	7.45	Pak9_A1	0.0123275
Pak9_A2_TS1	Pak9	A2	1	PaKiT01	EBOV	0.0001	36	2016-08-10 05:40:00	2016-08-10 13:08:00	112	7.46667	Pak9_A2	0.00121432
Pak9_A3_TS1	Pak9	A3	1	PaKiT01	EBOV	0.0001	36	2016-08-10 05:40:00	2016-08-10 13:10:00	41	7.5	Pak9_A3	0.000444526
Pak9_B2_TS1	Pak9	B2	1	PaKiT01	EBOV	0.0001	36	2016-08-10 05:40:00	2016-08-10 13:15:00	0	7.58333	Pak9_B2	0
Pak9_B1_TS1	Pak9	B1	1	PaKiT01	EBOV	0.001	36	2016-08-10 05:40:00	2016-08-10 13:18:00	2161	7.63333	Pak9_B1	0.0234298
Pak9_A1_TS2	Pak9	A1	2	PaKiT01	EBOV	0.001	36	2016-08-10 05:40:00	2016-08-10 14:27:00	2902	8.78333	Pak9_A1	0.0314638
Pak9_A2_TS2	Pak9	A2	2	PaKiT01	EBOV	0.0001	36	2016-08-10 05:40:00	2016-08-10 14:29:00	752	8.81667	Pak9_A2	0.00815326
Pak9_A3_TS2	Pak9	A3	2	PaKiT01	EBOV	0.0001	36	2016-08-10 05:40:00	2016-08-10 14:30:00	750	8.83333	Pak9_A3	0.00813158
Pak9_B2_TS2	Pak9	B2	2	PaKiT01	EBOV	0.0001	36	2016-08-10 05:40:00	2016-08-10 14:37:00	461	8.95	Pak9_B2	0.00499821
Pak9_B1_TS2	Pak9	B1	2	PaKiT01	EBOV	0.001	36	2016-08-10 05:40:00	2016-08-10 14:39:00	3451	8.98333	Pak9_B1	0.0374161
Pak9_A1_TS3	Pak9	A1	3	PaKiT01	EBOV	0.001	36	2016-08-10 05:40:00	2016-08-10 16:14:00	3994	10.5667	Pak9_A1	0.0433034
Pak9_A2_TS3	Pak9	A2	3	PaKiT01	EBOV	0.0001	36	2016-08-10 05:40:00	2016-08-10 16:15:00	1136	10.5833	Pak9_A2	0.0123166
Pak9_A3_TS3	Pak9	A3	3	PaKiT01	EBOV	0.0001	36	2016-08-10 05:40:00	2016-08-10 16:16:00	1323	10.6	Pak9_A3	0.0143441
Pak9_B2_TS3	Pak9	B2	3	PaKiT01	EBOV	0.0001	36	2016-08-10 05:40:00	2016-08-10 16:19:00	960	10.65	Pak9_B2	0.0104084
Pak9_B1_TS3	Pak9	B1	3	PaKiT01	EBOV	0.001	36	2016-08-10 05:40:00	2016-08-10 16:19:00	4598	10.65	Pak9_B1	0.049852
Pak9_A1_TS4	Pak9	A1	4	PaKiT01	EBOV	0.001	36	2016-08-10 05:40:00	2016-08-10 18:25:00	5216	12.75	Pak9_A1	0.0565524
Pak9_A2_TS4	Pak9	A2	4	PaKiT01	EBOV	0.0001	36	2016-08-10 05:40:00	2016-08-10 18:26:00	1577	12.7667	Pak9_A2	0.017098
Pak9_A3_TS4	Pak9	A3	4	PaKiT01	EBOV	0.0001	36	2016-08-10 05:40:00	2016-08-10 18:27:00	1716	12.7833	Pak9_A3	0.0186051
Pak9_B2_TS4	Pak9	B2	4	PaKiT01	EBOV	0.0001	36	2016-08-10 05:40:00	2016-08-10 18:33:00	1195	12.8833	Pak9_B2	0.0129563
Pak9_B1_TS4	Pak9	B1	4	PaKiT01	EBOV	0.001	36	2016-08-10 05:40:00	2016-08-10 18:34:00	6092	12.9	Pak9_B1	0.0660501
Pak9_A1_TS5	Pak9	A1	5	PaKiT01	EBOV	0.001	36	2016-08-10 05:40:00	2016-08-10 20:19:00	5929	14.65	Pak9_A1	0.0642828
Pak9_A2_TS5	Pak9	A2	5	PaKiT01	EBOV	0.0001	36	2016-08-10 05:40:00	2016-08-10 20:20:00	1783	14.6667	Pak9_A2	0.0193315
Pak9_A3_TS5	Pak9	A3	5	PaKiT01	EBOV	0.0001	36	2016-08-10 05:40:00	2016-08-10 20:21:00	2080	14.6833	Pak9_A3	0.0225516
Pak9_B2_TS5	Pak9	B2	5	PaKiT01	EBOV	0.0001	36	2016-08-10 05:40:00	2016-08-10 20:25:00	1239	14.75	Pak9_B2	0.0134334
Pak9_B1_TS5	Pak9	B1	5	PaKiT01	EBOV	0.001	36	2016-08-10 05:40:00	2016-08-10 20:26:00	7167	14.7667	Pak9_B1	0.0777054
Pak9_A1_TS6	Pak9	A1	6	PaKiT01	EBOV	0.001	36	2016-08-10 05:40:00	2016-08-10 21:50:00	6322	16.1667	Pak9_A1	0.0685438
Pak9_A2_TS6	Pak9	A2	6	PaKiT01	EBOV	0.0001	36	2016-08-10 05:40:00	2016-08-10 21:50:00	1940	16.1667	Pak9_A2	0.0210337
Pak9_A3_TS6	Pak9	A3	6	PaKiT01	EBOV	0.0001	36	2016-08-10 05:40:00	2016-08-10 21:51:00	2213	16.1833	Pak9_A3	0.0239936
Pak9_B2_TS6	Pak9	B2	6	PaKiT01	EBOV	0.0001	36	2016-08-10 05:40:00	2016-08-10 21:54:00	1436	16.2333	Pak9_B2	0.0155693
Pak9_B1_TS6	Pak9	B1	6	PaKiT01	EBOV	0.001	36	2016-08-10 05:40:00	2016-08-10 21:55:00	7620	16.25	Pak9_B1	0.0826169
Ron1_A1_TS1	Ron1	A1	1	RoNi/7.1	EBOV	0.001	36	2016-09-06 05:21:00	2016-09-06 12:04:00	21	6.71667	Ron1_A1	0.000255139
Ron1_A2_TS1	Ron1	A2	1	RoNi/7.1	EBOV	0.0001	36	2016-09-06 05:21:00	2016-09-06 12:06:00	23	6.75	Ron1_A2	0.000279438
Ron1_A3_TS1	Ron1	A3	1	RoNi/7.1	EBOV	0.001	36	2016-09-06 05:21:00	2016-09-06 12:08:00	10	6.78333	Ron1_A3	0.000121495
Ron1_B2_TS1	Ron1	B2	1	RoNi/7.1	EBOV	0.0001	36	2016-09-06 05:21:00	2016-09-06 12:15:00	0	6.9	Ron1_B2	0
Ron1_B1_TS1	Ron1	B1	1	RoNi/7.1	EBOV	0.001	36	2016-09-06 05:21:00	2016-09-06 12:18:00	29	6.95	Ron1_B1	0.000352335
Ron1_A1_TS2	Ron1	A1	2	RoNi/7.1	EBOV	0.001	36	2016-09-06 05:21:00	2016-09-06 15:54:00	127	10.55	Ron1_A1	0.00154298
Ron1_A2_TS2	Ron1	A2	2	RoNi/7.1	EBOV	0.0001	36	2016-09-06 05:21:00	2016-09-06 15:57:00	2	10.6	Ron1_A2	2.4299e-05
Ron1_A3_TS2	Ron1	A3	2	RoNi/7.1	EBOV	0.001	36	2016-09-06 05:21:00	2016-09-06 16:00:00	172	10.65	Ron1_A3	0.00208971
Ron1_B2_TS2	Ron1	B2	2	RoNi/7.1	EBOV	0.0001	36	2016-09-06 05:21:00	2016-09-06 16:06:00	4	10.75	Ron1_B2	4.85979e-05
Ron1_B1_TS2	Ron1	B1	2	RoNi/7.1	EBOV	0.001	36	2016-09-06 05:21:00	2016-09-06 16:07:00	203	10.7667	Ron1_B1	0.00246635
Ron1_A1_TS3	Ron1	A1	3	RoNi/7.1	EBOV	0.001	36	2016-09-06 05:21:00	2016-09-06 20:40:00	321	15.3167	Ron1_A1	0.00389999
Ron1_A2_TS3	Ron1	A2	3	RoNi/7.1	EBOV	0.0001	36	2016-09-06 05:21:00	2016-09-06 20:44:00	11	15.3833	Ron1_A2	0.000133644
Ron1_A3_TS3	Ron1	A3	3	RoNi/7.1	EBOV	0.001	36	2016-09-06 05:21:00	2016-09-06 20:46:00	230	15.4167	Ron1_A3	0.00279438
Ron1_B2_TS3	Ron1	B2	3	RoNi/7.1	EBOV	0.0001	36	2016-09-06 05:21:00	2016-09-06 20:52:00	30	15.5167	Ron1_B2	0.000364485
Ron1_B1_TS3	Ron1	B1	3	RoNi/7.1	EBOV	0.001	36	2016-09-06 05:21:00	2016-09-06 20:54:00	337	15.55	Ron1_B1	0.00409438
Ron1_A1_TS4	Ron1	A1	4	RoNi/7.1	EBOV	0.001	36	2016-09-06 05:21:00	2016-09-07 06:44:00	836	25.3833	Ron1_A1	0.010157
Ron1_A2_TS4	Ron1	A2	4	RoNi/7.1	EBOV	0.0001	36	2016-09-06 05:21:00	2016-09-07 06:46:00	42	25.4167	Ron1_A2	0.000510278
Ron1_A3_TS4	Ron1	A3	4	RoNi/7.1	EBOV	0.001	36	2016-09-06 05:21:00	2016-09-07 06:48:00	682	25.45	Ron1_A3	0.00828595
Ron1_B2_TS4	Ron1	B2	4	RoNi/7.1	EBOV	0.0001	36	2016-09-06 05:21:00	2016-09-07 06:55:00	66	25.5667	Ron1_B2	0.000801866
Ron1_B1_TS4	Ron1	B1	4	RoNi/7.1	EBOV	0.001	36	2016-09-06 05:21:00	2016-09-07 06:57:00	875	25.6	Ron1_B1	0.0106308
Ron10_A1_TS1	Ron10	A1	1	RoNi/7.1	EBOV	0.001	36	2016-09-13 05:07:00	2016-09-13 12:26:00	0	7.31667	Ron10_A1	0
Ron10_A2_TS1	Ron10	A2	1	RoNi/7.1	EBOV	0.0001	36	2016-09-13 05:07:00	2016-09-13 12:29:00	0	7.36667	Ron10_A2	0
Ron10_A3_TS1	Ron10	A3	1	RoNi/7.1	EBOV	0.001	36	2016-09-13 05:07:00	2016-09-13 12:32:00	0	7.41667	Ron10_A3	0
Ron10_B2_TS1	Ron10	B2	1	RoNi/7.1	EBOV	0.0001	36	2016-09-13 05:07:00	2016-09-13 12:39:00	19	7.53333	Ron10_B2	0.00023084
Ron10_B1_TS1	Ron10	B1	1	RoNi/7.1	EBOV	0.001	36	2016-09-13 05:07:00	2016-09-13 12:42:00	0	7.58333	Ron10_B1	0
Ron10_A1_TS2	Ron10	A1	2	RoNi/7.1	EBOV	0.001	36	2016-09-13 05:07:00	2016-09-13 16:01:00	253	10.9	Ron10_A1	0.00307382
Ron10_A2_TS2	Ron10	A2	2	RoNi/7.1	EBOV	0.0001	36	2016-09-13 05:07:00	2016-09-13 16:04:00	0	10.95	Ron10_A2	0
Ron10_A3_TS2	Ron10	A3	2	RoNi/7.1	EBOV	0.001	36	2016-09-13 05:07:00	2016-09-13 16:06:00	46	10.9833	Ron10_A3	0.000558876
Ron10_B2_TS2	Ron10	B2	2	RoNi/7.1	EBOV	0.0001	36	2016-09-13 05:07:00	2016-09-13 16:12:00	22	11.0833	Ron10_B2	0.000267289
Ron10_B1_TS2	Ron10	B1	2	RoNi/7.1	EBOV	0.001	36	2016-09-13 05:07:00	2016-09-13 16:14:00	108	11.1167	Ron10_B1	0.00131214
Ron10_A1_TS3	Ron10	A1	3	RoNi/7.1	EBOV	0.001	36	2016-09-13 05:07:00	2016-09-13 19:34:00	292	14.45	Ron10_A1	0.00354765
Ron10_A2_TS3	Ron10	A2	3	RoNi/7.1	EBOV	0.0001	36	2016-09-13 05:07:00	2016-09-13 19:36:00	2	14.4833	Ron10_A2	2.4299e-05
Ron10_A3_TS3	Ron10	A3	3	RoNi/7.1	EBOV	0.001	36	2016-09-13 05:07:00	2016-09-13 19:39:00	369	14.5333	Ron10_A3	0.00448316
Ron10_B2_TS3	Ron10	B2	3	RoNi/7.1	EBOV	0.0001	36	2016-09-13 05:07:00	2016-09-13 19:44:00	4	14.6167	Ron10_B2	4.85979e-05
Ron10_B1_TS3	Ron10	B1	3	RoNi/7.1	EBOV	0.001	36	2016-09-13 05:07:00	2016-09-13 19:46:00	225	14.65	Ron10_B1	0.00273363
Ron10_A1_TS4	Ron10	A1	4	RoNi/7.1	EBOV	0.001	36	2016-09-13 05:07:00	2016-09-13 22:13:00	530	17.1	Ron10_A1	0.00643923
Ron10_A2_TS4	Ron10	A2	4	RoNi/7.1	EBOV	0.0001	36	2016-09-13 05:07:00	2016-09-13 22:15:00	0	17.1333	Ron10_A2	0
Ron10_A3_TS4	Ron10	A3	4	RoNi/7.1	EBOV	0.001	36	2016-09-13 05:07:00	2016-09-13 22:17:00	350	17.1667	Ron10_A3	0.00425232
Ron10_B2_TS4	Ron10	B2	4	RoNi/7.1	EBOV	0.0001	36	2016-09-13 05:07:00	2016-09-13 22:22:00	2	17.25	Ron10_B2	2.4299e-05
Ron10_B1_TS4	Ron10	B1	4	RoNi/7.1	EBOV	0.001	36	2016-09-13 05:07:00	2016-09-13 22:18:00	443	17.1833	Ron10_B1	0.00538222
Ron10_A1_TS5	Ron10	A1	5	RoNi/7.1	EBOV	0.001	36	2016-09-13 05:07:00	2016-09-14 09:02:00	1886	27.9167	Ron10_A1	0.0229139
Ron10_A2_TS5	Ron10	A2	5	RoNi/7.1	EBOV	0.0001	36	2016-09-13 05:07:00	2016-09-14 09:04:00	96	27.95	Ron10_A2	0.00116635
Ron10_A3_TS5	Ron10	A3	5	RoNi/7.1	EBOV	0.001	36	2016-09-13 05:07:00	2016-09-14 09:06:00	1411	27.9833	Ron10_A3	0.0171429
Ron10_B2_TS5	Ron10	B2	5	RoNi/7.1	EBOV	0.0001	36	2016-09-13 05:07:00	2016-09-14 09:11:00	122	28.0667	Ron10_B2	0.00148224
Ron10_B1_TS5	Ron10	B1	5	RoNi/7.1	EBOV	0.001	36	2016-09-13 05:07:00	2016-09-14 09:12:00	1750	28.0833	Ron10_B1	0.0212616
Ron10_A1_TS6	Ron10	A1	6	RoNi/7.1	EBOV	0.001	36	2016-09-13 05:07:00	2016-09-14 17:54:00	6462	36.7833	Ron10_A1	0.07851
Ron10_A2_TS6	Ron10	A2	6	RoNi/7.1	EBOV	0.0001	36	2016-09-13 05:07:00	2016-09-14 17:56:00	213	36.8167	Ron10_A2	0.00258784
Ron10_A3_TS6	Ron10	A3	6	RoNi/7.1	EBOV	0.001	36	2016-09-13 05:07:00	2016-09-14 17:58:00	5285	36.85	Ron10_A3	0.06421
Ron10_B2_TS6	Ron10	B2	6	RoNi/7.1	EBOV	0.0001	36	2016-09-13 05:07:00	2016-09-14 18:04:00	492	36.95	Ron10_B2	0.00597755
Ron10_B1_TS6	Ron10	B1	6	RoNi/7.1	EBOV	0.001	36	2016-09-13 05:07:00	2016-09-14 18:06:00	6306	36.9833	Ron10_B1	0.0766147
Ron10_A1_TS7	Ron10	A1	7	RoNi/7.1	EBOV	0.001	36	2016-09-13 05:07:00	2016-09-15 08:46:00	8641	51.65	Ron10_A1	0.104984
Ron10_A2_TS7	Ron10	A2	7	RoNi/7.1	EBOV	0.0001	36	2016-09-13 05:07:00	2016-09-15 08:48:00	791	51.6833	Ron10_A2	0.00961024
Ron10_A3_TS7	Ron10	A3	7	RoNi/7.1	EBOV	0.001	36	2016-09-13 05:07:00	2016-09-15 08:49:00	10958	51.7	Ron10_A3	0.133134
Ron10_B2_TS7	Ron10	B2	7	RoNi/7.1	EBOV	0.0001	36	2016-09-13 05:07:00	2016-09-15 08:55:00	1734	51.8	Ron10_B2	0.0210672
Ron10_B1_TS7	Ron10	B1	7	RoNi/7.1	EBOV	0.001	36	2016-09-13 05:07:00	2016-09-15 08:57:00	11028	51.8333	Ron10_B1	0.133985
Ron10_A1_TS8	Ron10	A1	8	RoNi/7.1	EBOV	0.001	36	2016-09-13 05:07:00	2016-09-15 19:02:00	9821	61.9167	Ron10_A1	0.11932
Ron10_A2_TS8	Ron10	A2	8	RoNi/7.1	EBOV	0.0001	36	2016-09-13 05:07:00	2016-09-15 19:03:00	2685	61.9333	Ron10_A2	0.0326214
Ron10_A3_TS8	Ron10	A3	8	RoNi/7.1	EBOV	0.001	36	2016-09-13 05:07:00	2016-09-15 19:04:00	12286	61.95	Ron10_A3	0.149269
Ron10_B2_TS8	Ron10	B2	8	RoNi/7.1	EBOV	0.0001	36	2016-09-13 05:07:00	2016-09-15 19:08:00	2889	62.0167	Ron10_B2	0.0350999
Ron10_B1_TS8	Ron10	B1	8	RoNi/7.1	EBOV	0.001	36	2016-09-13 05:07:00	2016-09-15 19:09:00	12462	62.0333	Ron10_B1	0.151407
Ron11_A1_TS1	Ron11	A1	1	RoNi/7.1	EBOV	0.001	36	2016-09-13 05:07:00	2016-09-13 13:26:00	0	8.31667	Ron11_A1	0
Ron11_A2_TS1	Ron11	A2	1	RoNi/7.1	EBOV	0.0001	36	2016-09-13 05:07:00	2016-09-13 13:29:00	0	8.36667	Ron11_A2	0
Ron11_A3_TS1	Ron11	A3	1	RoNi/7.1	EBOV	0.0001	36	2016-09-13 05:07:00	2016-09-13 13:32:00	0	8.41667	Ron11_A3	0
Ron11_B2_TS1	Ron11	B2	1	RoNi/7.1	EBOV	0.0001	36	2016-09-13 05:07:00	2016-09-13 13:39:00	0	8.53333	Ron11_B2	0
Ron11_B1_TS1	Ron11	B1	1	RoNi/7.1	EBOV	0.001	36	2016-09-13 05:07:00	2016-09-13 13:42:00	0	8.58333	Ron11_B1	0
Ron11_A1_TS2	Ron11	A1	2	RoNi/7.1	EBOV	0.001	36	2016-09-13 05:07:00	2016-09-13 16:52:00	166	11.75	Ron11_A1	0.00201681
Ron11_A2_TS2	Ron11	A2	2	RoNi/7.1	EBOV	0.0001	36	2016-09-13 05:07:00	2016-09-13 16:55:00	1	11.8	Ron11_A2	1.21495e-05
Ron11_A3_TS2	Ron11	A3	2	RoNi/7.1	EBOV	0.0001	36	2016-09-13 05:07:00	2016-09-13 16:59:00	7	11.8667	Ron11_A3	8.50464e-05
Ron11_B2_TS2	Ron11	B2	2	RoNi/7.1	EBOV	0.0001	36	2016-09-13 05:07:00	2016-09-13 17:06:00	125	11.9833	Ron11_B2	0.00151869
Ron11_B1_TS2	Ron11	B1	2	RoNi/7.1	EBOV	0.001	36	2016-09-13 05:07:00	2016-09-13 17:09:00	93	12.0333	Ron11_B1	0.0011299
Ron11_A1_TS3	Ron11	A1	3	RoNi/7.1	EBOV	0.001	36	2016-09-13 05:07:00	2016-09-13 20:16:00	416	15.15	Ron11_A1	0.00505419
Ron11_A2_TS3	Ron11	A2	3	RoNi/7.1	EBOV	0.0001	36	2016-09-13 05:07:00	2016-09-13 20:18:00	109	15.1833	Ron11_A2	0.00132429
Ron11_A3_TS3	Ron11	A3	3	RoNi/7.1	EBOV	0.0001	36	2016-09-13 05:07:00	2016-09-13 20:22:00	29	15.25	Ron11_A3	0.000352335
Ron11_B2_TS3	Ron11	B2	3	RoNi/7.1	EBOV	0.0001	36	2016-09-13 05:07:00	2016-09-13 20:30:00	6	15.3833	Ron11_B2	7.28969e-05
Ron11_B1_TS3	Ron11	B1	3	RoNi/7.1	EBOV	0.001	36	2016-09-13 05:07:00	2016-09-13 20:32:00	239	15.4167	Ron11_B1	0.00290373
Ron11_A1_TS4	Ron11	A1	4	RoNi/7.1	EBOV	0.001	36	2016-09-13 05:07:00	2016-09-13 22:50:00	596	17.7167	Ron11_A1	0.00724109
Ron11_A2_TS4	Ron11	A2	4	RoNi/7.1	EBOV	0.0001	36	2016-09-13 05:07:00	2016-09-13 22:52:00	2	17.75	Ron11_A2	2.4299e-05
Ron11_A3_TS4	Ron11	A3	4	RoNi/7.1	EBOV	0.0001	36	2016-09-13 05:07:00	2016-09-13 22:53:00	173	17.7667	Ron11_A3	0.00210186
Ron11_B2_TS4	Ron11	B2	4	RoNi/7.1	EBOV	0.0001	36	2016-09-13 05:07:00	2016-09-13 22:58:00	11	17.85	Ron11_B2	0.000133644
Ron11_B1_TS4	Ron11	B1	4	RoNi/7.1	EBOV	0.001	36	2016-09-13 05:07:00	2016-09-13 22:55:00	478	17.8	Ron11_B1	0.00580745
Ron11_A1_TS5	Ron11	A1	5	RoNi/7.1	EBOV	0.001	36	2016-09-13 05:07:00	2016-09-14 09:28:00	2191	28.35	Ron11_A1	0.0266195
Ron11_A2_TS5	Ron11	A2	5	RoNi/7.1	EBOV	0.0001	36	2016-09-13 05:07:00	2016-09-14 09:30:00	50	28.3833	Ron11_A2	0.000607474
Ron11_A3_TS5	Ron11	A3	5	RoNi/7.1	EBOV	0.0001	36	2016-09-13 05:07:00	2016-09-14 09:32:00	396	28.4167	Ron11_A3	0.0048112
Ron11_B2_TS5	Ron11	B2	5	RoNi/7.1	EBOV	0.0001	36	2016-09-13 05:07:00	2016-09-14 09:38:00	199	28.5167	Ron11_B2	0.00241775
Ron11_B1_TS5	Ron11	B1	5	RoNi/7.1	EBOV	0.001	36	2016-09-13 05:07:00	2016-09-14 09:39:00	1840	28.5333	Ron11_B1	0.0223551
Ron11_A1_TS6	Ron11	A1	6	RoNi/7.1	EBOV	0.001	36	2016-09-13 05:07:00	2016-09-14 18:20:00	7478	37.2167	Ron11_A1	0.0908539
Ron11_A2_TS6	Ron11	A2	6	RoNi/7.1	EBOV	0.0001	36	2016-09-13 05:07:00	2016-09-14 18:22:00	235	37.25	Ron11_A2	0.00285513
Ron11_A3_TS6	Ron11	A3	6	RoNi/7.1	EBOV	0.0001	36	2016-09-13 05:07:00	2016-09-14 18:24:00	656	37.2833	Ron11_A3	0.00797006
Ron11_B2_TS6	Ron11	B2	6	RoNi/7.1	EBOV	0.0001	36	2016-09-13 05:07:00	2016-09-14 18:29:00	716	37.3667	Ron11_B2	0.00869903
Ron11_B1_TS6	Ron11	B1	6	RoNi/7.1	EBOV	0.001	36	2016-09-13 05:07:00	2016-09-14 18:32:00	6411	37.4167	Ron11_B1	0.0778904
Ron11_A1_TS7	Ron11	A1	7	RoNi/7.1	EBOV	0.001	36	2016-09-13 05:07:00	2016-09-15 09:24:00	11292	52.2833	Ron11_A1	0.137192
Ron11_A2_TS7	Ron11	A2	7	RoNi/7.1	EBOV	0.0001	36	2016-09-13 05:07:00	2016-09-15 09:25:00	1312	52.3	Ron11_A2	0.0159401
Ron11_A3_TS7	Ron11	A3	7	RoNi/7.1	EBOV	0.0001	36	2016-09-13 05:07:00	2016-09-15 09:26:00	1837	52.3167	Ron11_A3	0.0223186
Ron11_B2_TS7	Ron11	B2	7	RoNi/7.1	EBOV	0.0001	36	2016-09-13 05:07:00	2016-09-15 09:33:00	2842	52.4333	Ron11_B2	0.0345288
Ron11_B1_TS7	Ron11	B1	7	RoNi/7.1	EBOV	0.001	36	2016-09-13 05:07:00	2016-09-15 09:34:00	11706	52.45	Ron11_B1	0.142222
Ron11_A1_TS8	Ron11	A1	8	RoNi/7.1	EBOV	0.001	36	2016-09-13 05:07:00	2016-09-15 19:24:00	11902	62.2833	Ron11_A1	0.144603
Ron11_A2_TS8	Ron11	A2	8	RoNi/7.1	EBOV	0.0001	36	2016-09-13 05:07:00	2016-09-15 19:26:00	2542	62.3167	Ron11_A2	0.030884
Ron11_A3_TS8	Ron11	A3	8	RoNi/7.1	EBOV	0.0001	36	2016-09-13 05:07:00	2016-09-15 19:28:00	2834	62.35	Ron11_A3	0.0344316
Ron11_B2_TS8	Ron11	B2	8	RoNi/7.1	EBOV	0.0001	36	2016-09-13 05:07:00	2016-09-15 19:32:00	4569	62.4167	Ron11_B2	0.055511
Ron11_B1_TS8	Ron11	B1	8	RoNi/7.1	EBOV	0.001	36	2016-09-13 05:07:00	2016-09-15 19:34:00	15247	62.45	Ron11_B1	0.185243
Ron11_A1_TS9	Ron11	A1	9	RoNi/7.1	EBOV	0.001	36	2016-09-13 05:07:00	2016-09-16 08:13:00	4243	75.1	Ron11_A1	0.0515503
Ron11_A2_TS9	Ron11	A2	9	RoNi/7.1	EBOV	0.0001	36	2016-09-13 05:07:00	2016-09-16 08:14:00	4393	75.1167	Ron11_A2	0.0533727
Ron11_A3_TS9	Ron11	A3	9	RoNi/7.1	EBOV	0.0001	36	2016-09-13 05:07:00	2016-09-16 08:16:00	3494	75.15	Ron11_A3	0.0424503
Ron11_B2_TS9	Ron11	B2	9	RoNi/7.1	EBOV	0.0001	36	2016-09-13 05:07:00	2016-09-16 08:21:00	6028	75.2333	Ron11_B2	0.0732371
Ron11_B1_TS9	Ron11	B1	9	RoNi/7.1	EBOV	0.001	36	2016-09-13 05:07:00	2016-09-16 08:22:00	7507	75.25	Ron11_B1	0.0912062
Ron11_A1_TS10	Ron11	A1	10	RoNi/7.1	EBOV	0.001	36	2016-09-13 05:07:00	2016-09-16 21:19:00	918	88.2	Ron11_A1	0.0111532
Ron11_A2_TS10	Ron11	A2	10	RoNi/7.1	EBOV	0.0001	36	2016-09-13 05:07:00	2016-09-16 21:20:00	5051	88.2167	Ron11_A2	0.0613671
Ron11_A3_TS10	Ron11	A3	10	RoNi/7.1	EBOV	0.0001	36	2016-09-13 05:07:00	2016-09-16 21:22:00	3760	88.25	Ron11_A3	0.0456821
Ron11_B2_TS10	Ron11	B2	10	RoNi/7.1	EBOV	0.0001	36	2016-09-13 05:07:00	2016-09-16 21:28:00	5188	88.35	Ron11_B2	0.0630315
Ron11_B1_TS10	Ron11	B1	10	RoNi/7.1	EBOV	0.001	36	2016-09-13 05:07:00	2016-09-16 21:30:00	2024	88.3833	Ron11_B1	0.0245906
Ron12_A1_TS1	Ron12	A1	1	RoNi/7.1	EBOV	0.001	36	2016-09-13 05:07:00	2016-09-13 13:50:00	0	8.71667	Ron12_A1	0
Ron12_A2_TS1	Ron12	A2	1	RoNi/7.1	EBOV	0.0001	36	2016-09-13 05:07:00	2016-09-13 13:54:00	19	8.78333	Ron12_A2	0.00023084
Ron12_A3_TS1	Ron12	A3	1	RoNi/7.1	EBOV	0.0001	36	2016-09-13 05:07:00	2016-09-13 13:56:00	109	8.81667	Ron12_A3	0.00132429
Ron12_B2_TS1	Ron12	B2	1	RoNi/7.1	EBOV	0.0001	36	2016-09-13 05:07:00	2016-09-13 14:03:00	20	8.93333	Ron12_B2	0.00024299
Ron12_B1_TS1	Ron12	B1	1	RoNi/7.1	EBOV	0.001	36	2016-09-13 05:07:00	2016-09-13 14:06:00	49	8.98333	Ron12_B1	0.000595325
Ron12_A1_TS2	Ron12	A1	2	RoNi/7.1	EBOV	0.001	36	2016-09-13 05:07:00	2016-09-13 17:13:00	156	12.1	Ron12_A1	0.00189532
Ron12_A2_TS2	Ron12	A2	2	RoNi/7.1	EBOV	0.0001	36	2016-09-13 05:07:00	2016-09-13 17:18:00	50	12.1833	Ron12_A2	0.000607474
Ron12_A3_TS2	Ron12	A3	2	RoNi/7.1	EBOV	0.0001	36	2016-09-13 05:07:00	2016-09-13 17:22:00	23	12.25	Ron12_A3	0.000279438
Ron12_B2_TS2	Ron12	B2	2	RoNi/7.1	EBOV	0.0001	36	2016-09-13 05:07:00	2016-09-13 17:28:00	0	12.35	Ron12_B2	0
Ron12_B1_TS2	Ron12	B1	2	RoNi/7.1	EBOV	0.001	36	2016-09-13 05:07:00	2016-09-13 17:30:00	136	12.3833	Ron12_B1	0.00165233
Ron12_A1_TS3	Ron12	A1	3	RoNi/7.1	EBOV	0.001	36	2016-09-13 05:07:00	2016-09-13 20:38:00	305	15.5167	Ron12_A1	0.00370559
Ron12_A2_TS3	Ron12	A2	3	RoNi/7.1	EBOV	0.0001	36	2016-09-13 05:07:00	2016-09-13 20:40:00	167	15.55	Ron12_A2	0.00202896
Ron12_A3_TS3	Ron12	A3	3	RoNi/7.1	EBOV	0.0001	36	2016-09-13 05:07:00	2016-09-13 20:43:00	11	15.6	Ron12_A3	0.000133644
Ron12_B2_TS3	Ron12	B2	3	RoNi/7.1	EBOV	0.0001	36	2016-09-13 05:07:00	2016-09-13 20:49:00	157	15.7	Ron12_B2	0.00190747
Ron12_B1_TS3	Ron12	B1	3	RoNi/7.1	EBOV	0.001	36	2016-09-13 05:07:00	2016-09-13 20:51:00	394	15.7333	Ron12_B1	0.0047869
Ron12_A1_TS4	Ron12	A1	4	RoNi/7.1	EBOV	0.001	36	2016-09-13 05:07:00	2016-09-13 23:04:00	538	17.95	Ron12_A1	0.00653642
Ron12_A2_TS4	Ron12	A2	4	RoNi/7.1	EBOV	0.0001	36	2016-09-13 05:07:00	2016-09-13 23:07:00	24	18	Ron12_A2	0.000291588
Ron12_A3_TS4	Ron12	A3	4	RoNi/7.1	EBOV	0.0001	36	2016-09-13 05:07:00	2016-09-13 23:10:00	20	18.05	Ron12_A3	0.00024299
Ron12_B2_TS4	Ron12	B2	4	RoNi/7.1	EBOV	0.0001	36	2016-09-13 05:07:00	2016-09-13 23:14:00	6	18.1167	Ron12_B2	7.28969e-05
Ron12_B1_TS4	Ron12	B1	4	RoNi/7.1	EBOV	0.001	36	2016-09-13 05:07:00	2016-09-13 23:11:00	519	18.0667	Ron12_B1	0.00630558
Ron12_A1_TS5	Ron12	A1	5	RoNi/7.1	EBOV	0.001	36	2016-09-13 05:07:00	2016-09-14 09:53:00	1973	28.7667	Ron12_A1	0.0239709
Ron12_A2_TS5	Ron12	A2	5	RoNi/7.1	EBOV	0.0001	36	2016-09-13 05:07:00	2016-09-14 09:56:00	294	28.8167	Ron12_A2	0.00357195
Ron12_A3_TS5	Ron12	A3	5	RoNi/7.1	EBOV	0.0001	36	2016-09-13 05:07:00	2016-09-14 09:59:00	106	28.8667	Ron12_A3	0.00128785
Ron12_B2_TS5	Ron12	B2	5	RoNi/7.1	EBOV	0.0001	36	2016-09-13 05:07:00	2016-09-14 10:06:00	206	28.9833	Ron12_B2	0.00250279
Ron12_B1_TS5	Ron12	B1	5	RoNi/7.1	EBOV	0.001	36	2016-09-13 05:07:00	2016-09-14 10:07:00	2303	29	Ron12_B1	0.0279803
Ron12_A1_TS6	Ron12	A1	6	RoNi/7.1	EBOV	0.001	36	2016-09-13 05:07:00	2016-09-14 18:43:00	5781	37.6	Ron12_A1	0.0702362
Ron12_A2_TS6	Ron12	A2	6	RoNi/7.1	EBOV	0.0001	36	2016-09-13 05:07:00	2016-09-14 18:45:00	1352	37.6333	Ron12_A2	0.0164261
Ron12_A3_TS6	Ron12	A3	6	RoNi/7.1	EBOV	0.0001	36	2016-09-13 05:07:00	2016-09-14 18:48:00	422	37.6833	Ron12_A3	0.00512708
Ron12_B2_TS6	Ron12	B2	6	RoNi/7.1	EBOV	0.0001	36	2016-09-13 05:07:00	2016-09-14 18:54:00	1039	37.7833	Ron12_B2	0.0126233
Ron12_B1_TS6	Ron12	B1	6	RoNi/7.1	EBOV	0.001	36	2016-09-13 05:07:00	2016-09-14 18:56:00	6821	37.8167	Ron12_B1	0.0828717
Ron12_A1_TS7	Ron12	A1	7	RoNi/7.1	EBOV	0.001	36	2016-09-13 05:07:00	2016-09-15 09:35:00	7614	52.4667	Ron12_A1	0.0925062
Ron12_A2_TS7	Ron12	A2	7	RoNi/7.1	EBOV	0.0001	36	2016-09-13 05:07:00	2016-09-15 09:36:00	4234	52.4833	Ron12_A2	0.0514409
Ron12_A3_TS7	Ron12	A3	7	RoNi/7.1	EBOV	0.0001	36	2016-09-13 05:07:00	2016-09-15 09:38:00	1635	52.5167	Ron12_A3	0.0198644
Ron12_B2_TS7	Ron12	B2	7	RoNi/7.1	EBOV	0.0001	36	2016-09-13 05:07:00	2016-09-15 09:43:00	3725	52.6	Ron12_B2	0.0452568
Ron12_B1_TS7	Ron12	B1	7	RoNi/7.1	EBOV	0.001	36	2016-09-13 05:07:00	2016-09-15 09:46:00	11535	52.65	Ron12_B1	0.140144
Ron12_A1_TS8	Ron12	A1	8	RoNi/7.1	EBOV	0.001	36	2016-09-13 05:07:00	2016-09-15 19:35:00	7581	62.4667	Ron12_A1	0.0921053
Ron12_A2_TS8	Ron12	A2	8	RoNi/7.1	EBOV	0.0001	36	2016-09-13 05:07:00	2016-09-15 19:37:00	5576	62.5	Ron12_A2	0.0677455
Ron12_A3_TS8	Ron12	A3	8	RoNi/7.1	EBOV	0.0001	36	2016-09-13 05:07:00	2016-09-15 19:39:00	2834	62.5333	Ron12_A3	0.0344316
Ron12_B2_TS8	Ron12	B2	8	RoNi/7.1	EBOV	0.0001	36	2016-09-13 05:07:00	2016-09-15 19:44:00	7145	62.6167	Ron12_B2	0.0868081
Ron12_B1_TS8	Ron12	B1	8	RoNi/7.1	EBOV	0.001	36	2016-09-13 05:07:00	2016-09-15 19:47:00	13331	62.6667	Ron12_B1	0.161965
Ron12_A1_TS9	Ron12	A1	9	RoNi/7.1	EBOV	0.001	36	2016-09-13 05:07:00	2016-09-16 08:25:00	3748	75.3	Ron12_A1	0.0455363
Ron12_A2_TS9	Ron12	A2	9	RoNi/7.1	EBOV	0.0001	36	2016-09-13 05:07:00	2016-09-16 08:27:00	4443	75.3333	Ron12_A2	0.0539802
Ron12_A3_TS9	Ron12	A3	9	RoNi/7.1	EBOV	0.0001	36	2016-09-13 05:07:00	2016-09-16 08:28:00	3825	75.35	Ron12_A3	0.0464718
Ron12_B2_TS9	Ron12	B2	9	RoNi/7.1	EBOV	0.0001	36	2016-09-13 05:07:00	2016-09-16 08:33:00	7533	75.4333	Ron12_B2	0.0915221
Ron12_B1_TS9	Ron12	B1	9	RoNi/7.1	EBOV	0.001	36	2016-09-13 05:07:00	2016-09-16 08:35:00	6419	75.4667	Ron12_B1	0.0779876
Ron12_A1_TS10	Ron12	A1	10	RoNi/7.1	EBOV	0.001	36	2016-09-13 05:07:00	2016-09-16 21:32:00	1313	88.4167	Ron12_A1	0.0159523
Ron12_A2_TS10	Ron12	A2	10	RoNi/7.1	EBOV	0.0001	36	2016-09-13 05:07:00	2016-09-16 21:33:00	3119	88.4333	Ron12_A2	0.0378943
Ron12_A3_TS10	Ron12	A3	10	RoNi/7.1	EBOV	0.0001	36	2016-09-13 05:07:00	2016-09-16 21:35:00	4320	88.4667	Ron12_A3	0.0524858
Ron12_B2_TS10	Ron12	B2	10	RoNi/7.1	EBOV	0.0001	36	2016-09-13 05:07:00	2016-09-16 21:41:00	4992	88.5667	Ron12_B2	0.0606502
Ron12_B1_TS10	Ron12	B1	10	RoNi/7.1	EBOV	0.001	36	2016-09-13 05:07:00	2016-09-16 21:43:00	2034	88.6	Ron12_B1	0.0247121
Ron12_A1_TS11	Ron12	A1	11	RoNi/7.1	EBOV	0.001	36	2016-09-13 05:07:00	2016-09-17 10:30:00	686	101.383	Ron12_A1	0.00833455
Ron12_A2_TS11	Ron12	A2	11	RoNi/7.1	EBOV	0.0001	36	2016-09-13 05:07:00	2016-09-17 10:32:00	2194	101.417	Ron12_A2	0.026656
Ron12_A3_TS11	Ron12	A3	11	RoNi/7.1	EBOV	0.0001	36	2016-09-13 05:07:00	2016-09-17 10:35:00	3198	101.467	Ron12_A3	0.0388541
Ron12_B2_TS11	Ron12	B2	11	RoNi/7.1	EBOV	0.0001	36	2016-09-13 05:07:00	2016-09-17 10:42:00	2249	101.583	Ron12_B2	0.0273242
Ron12_B1_TS11	Ron12	B1	11	RoNi/7.1	EBOV	0.001	36	2016-09-13 05:07:00	2016-09-17 10:44:00	392	101.617	Ron12_B1	0.0047626
Ron12_A1_TS12	Ron12	A1	12	RoNi/7.1	EBOV	0.001	36	2016-09-13 05:07:00	2016-09-17 19:06:00	1617	109.983	Ron12_A1	0.0196457
Ron12_A2_TS12	Ron12	A2	12	RoNi/7.1	EBOV	0.0001	36	2016-09-13 05:07:00	2016-09-17 19:09:00	2052	110.033	Ron12_A2	0.0249307
Ron12_A3_TS12	Ron12	A3	12	RoNi/7.1	EBOV	0.0001	36	2016-09-13 05:07:00	2016-09-17 19:11:00	2309	110.067	Ron12_A3	0.0280532
Ron12_B2_TS12	Ron12	B2	12	RoNi/7.1	EBOV	0.0001	36	2016-09-13 05:07:00	2016-09-17 19:16:00	1484	110.15	Ron12_B2	0.0180298
Ron12_B1_TS12	Ron12	B1	12	RoNi/7.1	EBOV	0.001	36	2016-09-13 05:07:00	2016-09-17 19:18:00	65	110.183	Ron12_B1	0.000789717
Ron12_A1_TS13	Ron12	A1	13	RoNi/7.1	EBOV	0.001	36	2016-09-13 05:07:00	2016-09-18 08:23:00	1570	123.267	Ron12_A1	0.0190747
Ron12_A2_TS13	Ron12	A2	13	RoNi/7.1	EBOV	0.0001	36	2016-09-13 05:07:00	2016-09-18 08:26:00	2216	123.317	Ron12_A2	0.0269233
Ron12_A3_TS13	Ron12	A3	13	RoNi/7.1	EBOV	0.0001	36	2016-09-13 05:07:00	2016-09-18 08:29:00	1990	123.367	Ron12_A3	0.0241775
Ron12_B2_TS13	Ron12	B2	13	RoNi/7.1	EBOV	0.0001	36	2016-09-13 05:07:00	2016-09-18 08:35:00	898	123.467	Ron12_B2	0.0109102
Ron12_B1_TS13	Ron12	B1	13	RoNi/7.1	EBOV	0.001	36	2016-09-13 05:07:00	2016-09-18 08:39:00	415	123.533	Ron12_B1	0.00504204
Ron12_A1_TS14	Ron12	A1	14	RoNi/7.1	EBOV	0.001	36	2016-09-13 05:07:00	2016-09-18 20:03:00	1367	134.933	Ron12_A1	0.0166083
Ron12_A2_TS14	Ron12	A2	14	RoNi/7.1	EBOV	0.0001	36	2016-09-13 05:07:00	2016-09-18 20:06:00	1631	134.983	Ron12_A2	0.0198158
Ron12_A3_TS14	Ron12	A3	14	RoNi/7.1	EBOV	0.0001	36	2016-09-13 05:07:00	2016-09-18 20:10:00	1403	135.05	Ron12_A3	0.0170457
Ron12_B2_TS14	Ron12	B2	14	RoNi/7.1	EBOV	0.0001	36	2016-09-13 05:07:00	2016-09-18 20:18:00	1598	135.183	Ron12_B2	0.0194149
Ron12_B1_TS14	Ron12	B1	14	RoNi/7.1	EBOV	0.001	36	2016-09-13 05:07:00	2016-09-18 20:21:00	125	135.233	Ron12_B1	0.00151869
Ron13_A1_TS1	Ron13	A1	1	RoNi/7.1	VSVG	0.001	36	2016-09-13 04:46:00	2016-09-13 12:46:00	292	8	Ron13_A1	0.00354765
Ron13_A2_TS1	Ron13	A2	1	RoNi/7.1	VSVG	0.0001	36	2016-09-13 04:46:00	2016-09-13 12:49:00	0	8.05	Ron13_A2	0
Ron13_A3_TS1	Ron13	A3	1	RoNi/7.1	VSVG	0.001	36	2016-09-13 04:46:00	2016-09-13 12:52:00	421	8.1	Ron13_A3	0.00511493
Ron13_B2_TS1	Ron13	B2	1	RoNi/7.1	VSVG	0.0001	36	2016-09-13 04:46:00	2016-09-13 12:58:00	0	8.2	Ron13_B2	0
Ron13_B1_TS1	Ron13	B1	1	RoNi/7.1	VSVG	0.001	36	2016-09-13 04:46:00	2016-09-13 13:00:00	497	8.23333	Ron13_B1	0.0060383
Ron13_A1_TS2	Ron13	A1	2	RoNi/7.1	VSVG	0.001	36	2016-09-13 04:46:00	2016-09-13 16:20:00	1231	11.5667	Ron13_A1	0.014956
Ron13_A2_TS2	Ron13	A2	2	RoNi/7.1	VSVG	0.0001	36	2016-09-13 04:46:00	2016-09-13 16:22:00	30	11.6	Ron13_A2	0.000364485
Ron13_A3_TS2	Ron13	A3	2	RoNi/7.1	VSVG	0.001	36	2016-09-13 04:46:00	2016-09-13 16:23:00	1444	11.6167	Ron13_A3	0.0175439
Ron13_B2_TS2	Ron13	B2	2	RoNi/7.1	VSVG	0.0001	36	2016-09-13 04:46:00	2016-09-13 16:29:00	157	11.7167	Ron13_B2	0.00190747
Ron13_B1_TS2	Ron13	B1	2	RoNi/7.1	VSVG	0.001	36	2016-09-13 04:46:00	2016-09-13 16:31:00	1543	11.75	Ron13_B1	0.0187467
Ron13_A1_TS3	Ron13	A1	3	RoNi/7.1	VSVG	0.001	36	2016-09-13 04:46:00	2016-09-13 19:53:00	4151	15.1167	Ron13_A1	0.0504325
Ron13_A2_TS3	Ron13	A2	3	RoNi/7.1	VSVG	0.0001	36	2016-09-13 04:46:00	2016-09-13 19:54:00	559	15.1333	Ron13_A2	0.00679156
Ron13_A3_TS3	Ron13	A3	3	RoNi/7.1	VSVG	0.001	36	2016-09-13 04:46:00	2016-09-13 19:54:00	4257	15.1333	Ron13_A3	0.0517204
Ron13_B2_TS3	Ron13	B2	3	RoNi/7.1	VSVG	0.0001	36	2016-09-13 04:46:00	2016-09-13 20:00:00	941	15.2333	Ron13_B2	0.0114327
Ron13_B1_TS3	Ron13	B1	3	RoNi/7.1	VSVG	0.001	36	2016-09-13 04:46:00	2016-09-13 20:01:00	5209	15.25	Ron13_B1	0.0632867
Ron13_A1_TS4	Ron13	A1	4	RoNi/7.1	VSVG	0.001	36	2016-09-13 04:46:00	2016-09-13 22:28:00	11113	17.7	Ron13_A1	0.135017
Ron13_A2_TS4	Ron13	A2	4	RoNi/7.1	VSVG	0.0001	36	2016-09-13 04:46:00	2016-09-13 22:29:00	1363	17.7167	Ron13_A2	0.0165598
Ron13_A3_TS4	Ron13	A3	4	RoNi/7.1	VSVG	0.001	36	2016-09-13 04:46:00	2016-09-13 22:30:00	9262	17.7333	Ron13_A3	0.112529
Ron13_B2_TS4	Ron13	B2	4	RoNi/7.1	VSVG	0.0001	36	2016-09-13 04:46:00	2016-09-13 22:32:00	2072	17.7667	Ron13_B2	0.0251737
Ron13_B1_TS4	Ron13	B1	4	RoNi/7.1	VSVG	0.001	36	2016-09-13 04:46:00	2016-09-13 22:31:00	9729	17.75	Ron13_B1	0.118202
Ron14_A1_TS1	Ron14	A1	1	RoNi/7.1	VSVG	0.001	36	2016-09-13 04:46:00	2016-09-13 13:07:00	245	8.35	Ron14_A1	0.00297662
Ron14_A2_TS1	Ron14	A2	1	RoNi/7.1	VSVG	0.0001	36	2016-09-13 04:46:00	2016-09-13 13:10:00	194	8.4	Ron14_A2	0.002357
Ron14_A3_TS1	Ron14	A3	1	RoNi/7.1	VSVG	0.001	36	2016-09-13 04:46:00	2016-09-13 13:13:00	465	8.45	Ron14_A3	0.00564951
Ron14_B2_TS1	Ron14	B2	1	RoNi/7.1	VSVG	0.0001	36	2016-09-13 04:46:00	2016-09-13 13:19:00	0	8.55	Ron14_B2	0
Ron14_B1_TS1	Ron14	B1	1	RoNi/7.1	VSVG	0.001	36	2016-09-13 04:46:00	2016-09-13 13:20:00	528	8.56667	Ron14_B1	0.00641493
Ron14_A1_TS2	Ron14	A1	2	RoNi/7.1	VSVG	0.001	36	2016-09-13 04:46:00	2016-09-13 16:37:00	1417	11.85	Ron14_A1	0.0172158
Ron14_A2_TS2	Ron14	A2	2	RoNi/7.1	VSVG	0.0001	36	2016-09-13 04:46:00	2016-09-13 16:40:00	172	11.9	Ron14_A2	0.00208971
Ron14_A3_TS2	Ron14	A3	2	RoNi/7.1	VSVG	0.001	36	2016-09-13 04:46:00	2016-09-13 16:42:00	1622	11.9333	Ron14_A3	0.0197065
Ron14_B2_TS2	Ron14	B2	2	RoNi/7.1	VSVG	0.0001	36	2016-09-13 04:46:00	2016-09-13 16:47:00	58	12.0167	Ron14_B2	0.00070467
Ron14_B1_TS2	Ron14	B1	2	RoNi/7.1	VSVG	0.001	36	2016-09-13 04:46:00	2016-09-13 16:48:00	1635	12.0333	Ron14_B1	0.0198644
Ron14_A1_TS3	Ron14	A1	3	RoNi/7.1	VSVG	0.001	36	2016-09-13 04:46:00	2016-09-13 20:03:00	4709	15.2833	Ron14_A1	0.0572119
Ron14_A2_TS3	Ron14	A2	3	RoNi/7.1	VSVG	0.0001	36	2016-09-13 04:46:00	2016-09-13 20:04:00	975	15.3	Ron14_A2	0.0118458
Ron14_A3_TS3	Ron14	A3	3	RoNi/7.1	VSVG	0.001	36	2016-09-13 04:46:00	2016-09-13 20:06:00	5207	15.3333	Ron14_A3	0.0632624
Ron14_B2_TS3	Ron14	B2	3	RoNi/7.1	VSVG	0.0001	36	2016-09-13 04:46:00	2016-09-13 20:10:00	668	15.4	Ron14_B2	0.00811586
Ron14_B1_TS3	Ron14	B1	3	RoNi/7.1	VSVG	0.001	36	2016-09-13 04:46:00	2016-09-13 20:11:00	5181	15.4167	Ron14_B1	0.0629465
Ron14_A1_TS4	Ron14	A1	4	RoNi/7.1	VSVG	0.001	36	2016-09-13 04:46:00	2016-09-13 22:40:00	8864	17.9	Ron14_A1	0.107693
Ron14_A2_TS4	Ron14	A2	4	RoNi/7.1	VSVG	0.0001	36	2016-09-13 04:46:00	2016-09-13 22:41:00	1967	17.9167	Ron14_A2	0.023898
Ron14_A3_TS4	Ron14	A3	4	RoNi/7.1	VSVG	0.001	36	2016-09-13 04:46:00	2016-09-13 22:42:00	9916	17.9333	Ron14_A3	0.120474
Ron14_B2_TS4	Ron14	B2	4	RoNi/7.1	VSVG	0.0001	36	2016-09-13 04:46:00	2016-09-13 22:43:00	1457	17.95	Ron14_B2	0.0177018
Ron14_B1_TS4	Ron14	B1	4	RoNi/7.1	VSVG	0.001	36	2016-09-13 04:46:00	2016-09-13 22:43:00	9963	17.95	Ron14_B1	0.121045
Ron14_A1_TS5	Ron14	A1	5	RoNi/7.1	VSVG	0.001	36	2016-09-13 04:46:00	2016-09-14 09:15:00	20328	28.4833	Ron14_A1	0.246975
Ron14_A2_TS5	Ron14	A2	5	RoNi/7.1	VSVG	0.0001	36	2016-09-13 04:46:00	2016-09-14 09:16:00	14864	28.5	Ron14_A2	0.18059
Ron14_A3_TS5	Ron14	A3	5	RoNi/7.1	VSVG	0.001	36	2016-09-13 04:46:00	2016-09-14 09:19:00	23654	28.55	Ron14_A3	0.287384
Ron14_B2_TS5	Ron14	B2	5	RoNi/7.1	VSVG	0.0001	36	2016-09-13 04:46:00	2016-09-14 09:24:00	13482	28.6333	Ron14_B2	0.163799
Ron14_B1_TS5	Ron14	B1	5	RoNi/7.1	VSVG	0.001	36	2016-09-13 04:46:00	2016-09-14 09:26:00	25572	28.6667	Ron14_B1	0.310687
Ron14_A1_TS6	Ron14	A1	6	RoNi/7.1	VSVG	0.001	36	2016-09-13 04:46:00	2016-09-14 18:08:00	8704	37.3667	Ron14_A1	0.105749
Ron14_A2_TS6	Ron14	A2	6	RoNi/7.1	VSVG	0.0001	36	2016-09-13 04:46:00	2016-09-14 18:10:00	13898	37.4	Ron14_A2	0.168854
Ron14_A3_TS6	Ron14	A3	6	RoNi/7.1	VSVG	0.001	36	2016-09-13 04:46:00	2016-09-14 18:12:00	10731	37.4333	Ron14_A3	0.130376
Ron14_B2_TS6	Ron14	B2	6	RoNi/7.1	VSVG	0.0001	36	2016-09-13 04:46:00	2016-09-14 18:17:00	16955	37.5167	Ron14_B2	0.205995
Ron14_B1_TS6	Ron14	B1	6	RoNi/7.1	VSVG	0.001	36	2016-09-13 04:46:00	2016-09-14 18:18:00	10893	37.5333	Ron14_B1	0.132344
Ron15_A1_TS1	Ron15	A1	1	RoNi/7.1	VSVG	0.001	36	2016-09-13 04:46:00	2016-09-13 14:14:00	646	9.46667	Ron15_A1	0.00784857
Ron15_A2_TS1	Ron15	A2	1	RoNi/7.1	VSVG	0.0001	36	2016-09-13 04:46:00	2016-09-13 14:17:00	53	9.51667	Ron15_A2	0.000643923
Ron15_A3_TS1	Ron15	A3	1	RoNi/7.1	VSVG	0.0001	36	2016-09-13 04:46:00	2016-09-13 14:20:00	152	9.56667	Ron15_A3	0.00184672
Ron15_B2_TS1	Ron15	B2	1	RoNi/7.1	VSVG	0.0001	36	2016-09-13 04:46:00	2016-09-13 14:27:00	13	9.68333	Ron15_B2	0.000157943
Ron15_B1_TS1	Ron15	B1	1	RoNi/7.1	VSVG	0.001	36	2016-09-13 04:46:00	2016-09-13 14:28:00	739	9.7	Ron15_B1	0.00897847
Ron15_A1_TS2	Ron15	A1	2	RoNi/7.1	VSVG	0.001	36	2016-09-13 04:46:00	2016-09-13 17:42:00	2085	12.9333	Ron15_A1	0.0253317
Ron15_A2_TS2	Ron15	A2	2	RoNi/7.1	VSVG	0.0001	36	2016-09-13 04:46:00	2016-09-13 17:45:00	319	12.9833	Ron15_A2	0.00387569
Ron15_A3_TS2	Ron15	A3	2	RoNi/7.1	VSVG	0.0001	36	2016-09-13 04:46:00	2016-09-13 17:47:00	429	13.0167	Ron15_A3	0.00521213
Ron15_B2_TS2	Ron15	B2	2	RoNi/7.1	VSVG	0.0001	36	2016-09-13 04:46:00	2016-09-13 17:54:00	296	13.1333	Ron15_B2	0.00359625
Ron15_B1_TS2	Ron15	B1	2	RoNi/7.1	VSVG	0.001	36	2016-09-13 04:46:00	2016-09-13 17:55:00	2493	13.15	Ron15_B1	0.0302887
Ron15_A1_TS3	Ron15	A1	3	RoNi/7.1	VSVG	0.001	36	2016-09-13 04:46:00	2016-09-13 20:54:00	6196	16.1333	Ron15_A1	0.0752782
Ron15_A2_TS3	Ron15	A2	3	RoNi/7.1	VSVG	0.0001	36	2016-09-13 04:46:00	2016-09-13 20:57:00	984	16.1833	Ron15_A2	0.0119551
Ron15_A3_TS3	Ron15	A3	3	RoNi/7.1	VSVG	0.0001	36	2016-09-13 04:46:00	2016-09-13 21:00:00	1509	16.2333	Ron15_A3	0.0183336
Ron15_B2_TS3	Ron15	B2	3	RoNi/7.1	VSVG	0.0001	36	2016-09-13 04:46:00	2016-09-13 21:05:00	882	16.3167	Ron15_B2	0.0107158
Ron15_B1_TS3	Ron15	B1	3	RoNi/7.1	VSVG	0.001	36	2016-09-13 04:46:00	2016-09-13 21:06:00	7195	16.3333	Ron15_B1	0.0874156
Ron15_A1_TS4	Ron15	A1	4	RoNi/7.1	VSVG	0.001	36	2016-09-13 04:46:00	2016-09-13 23:18:00	9171	18.5333	Ron15_A1	0.111423
Ron15_A2_TS4	Ron15	A2	4	RoNi/7.1	VSVG	0.0001	36	2016-09-13 04:46:00	2016-09-13 23:21:00	2129	18.5833	Ron15_A2	0.0258663
Ron15_A3_TS4	Ron15	A3	4	RoNi/7.1	VSVG	0.0001	36	2016-09-13 04:46:00	2016-09-13 23:23:00	2606	18.6167	Ron15_A3	0.0316616
Ron15_B2_TS4	Ron15	B2	4	RoNi/7.1	VSVG	0.0001	36	2016-09-13 04:46:00	2016-09-13 23:24:00	1838	18.6333	Ron15_B2	0.0223308
Ron15_B1_TS4	Ron15	B1	4	RoNi/7.1	VSVG	0.001	36	2016-09-13 04:46:00	2016-09-13 23:24:00	11177	18.6333	Ron15_B1	0.135795
Ron15_A1_TS5	Ron15	A1	5	RoNi/7.1	VSVG	0.001	36	2016-09-13 04:46:00	2016-09-14 08:50:00	24584	28.0667	Ron15_A1	0.298683
Ron15_A2_TS5	Ron15	A2	5	RoNi/7.1	VSVG	0.0001	36	2016-09-13 04:46:00	2016-09-14 08:52:00	16947	28.1	Ron15_A2	0.205897
Ron15_A3_TS5	Ron15	A3	5	RoNi/7.1	VSVG	0.0001	36	2016-09-13 04:46:00	2016-09-14 08:54:00	13012	28.1333	Ron15_A3	0.158089
Ron15_B2_TS5	Ron15	B2	5	RoNi/7.1	VSVG	0.0001	36	2016-09-13 04:46:00	2016-09-14 08:58:00	19239	28.2	Ron15_B2	0.233744
Ron15_B1_TS5	Ron15	B1	5	RoNi/7.1	VSVG	0.001	36	2016-09-13 04:46:00	2016-09-14 09:00:00	24824	28.2333	Ron15_B1	0.301599
Ron16_A1_TS1	Ron16	A1	1	RoNi/7.1	VSVG	0.001	36	2016-09-13 04:46:00	2016-09-13 14:31:00	887	9.75	Ron16_A1	0.0107766
Ron16_A2_TS1	Ron16	A2	1	RoNi/7.1	VSVG	0.0001	36	2016-09-13 04:46:00	2016-09-13 14:34:00	117	9.8	Ron16_A2	0.00142149
Ron16_A3_TS1	Ron16	A3	1	RoNi/7.1	VSVG	0.0001	36	2016-09-13 04:46:00	2016-09-13 14:38:00	194	9.86667	Ron16_A3	0.002357
Ron16_B2_TS1	Ron16	B2	1	RoNi/7.1	VSVG	0.0001	36	2016-09-13 04:46:00	2016-09-13 14:43:00	6	9.95	Ron16_B2	7.28969e-05
Ron16_B1_TS1	Ron16	B1	1	RoNi/7.1	VSVG	0.001	36	2016-09-13 04:46:00	2016-09-13 14:45:00	845	9.98333	Ron16_B1	0.0102663
Ron16_A1_TS2	Ron16	A1	2	RoNi/7.1	VSVG	0.001	36	2016-09-13 04:46:00	2016-09-13 17:58:00	2784	13.2	Ron16_A1	0.0338242
Ron16_A2_TS2	Ron16	A2	2	RoNi/7.1	VSVG	0.0001	36	2016-09-13 04:46:00	2016-09-13 18:01:00	97	13.25	Ron16_A2	0.0011785
Ron16_A3_TS2	Ron16	A3	2	RoNi/7.1	VSVG	0.0001	36	2016-09-13 04:46:00	2016-09-13 18:03:00	651	13.2833	Ron16_A3	0.00790932
Ron16_B2_TS2	Ron16	B2	2	RoNi/7.1	VSVG	0.0001	36	2016-09-13 04:46:00	2016-09-13 18:09:00	235	13.3833	Ron16_B2	0.00285513
Ron16_B1_TS2	Ron16	B1	2	RoNi/7.1	VSVG	0.001	36	2016-09-13 04:46:00	2016-09-13 18:11:00	2804	13.4167	Ron16_B1	0.0340672
Ron16_A1_TS3	Ron16	A1	3	RoNi/7.1	VSVG	0.001	36	2016-09-13 04:46:00	2016-09-13 21:11:00	7293	16.4167	Ron16_A1	0.0886062
Ron16_A2_TS3	Ron16	A2	3	RoNi/7.1	VSVG	0.0001	36	2016-09-13 04:46:00	2016-09-13 21:13:00	409	16.45	Ron16_A2	0.00496914
Ron16_A3_TS3	Ron16	A3	3	RoNi/7.1	VSVG	0.0001	36	2016-09-13 04:46:00	2016-09-13 21:15:00	1768	16.4833	Ron16_A3	0.0214803
Ron16_B2_TS3	Ron16	B2	3	RoNi/7.1	VSVG	0.0001	36	2016-09-13 04:46:00	2016-09-13 21:21:00	980	16.5833	Ron16_B2	0.0119065
Ron16_B1_TS3	Ron16	B1	3	RoNi/7.1	VSVG	0.001	36	2016-09-13 04:46:00	2016-09-13 21:22:00	7809	16.6	Ron16_B1	0.0948753
Ron16_A1_TS4	Ron16	A1	4	RoNi/7.1	VSVG	0.001	36	2016-09-13 04:46:00	2016-09-13 23:26:00	11898	18.6667	Ron16_A1	0.144555
Ron16_A2_TS4	Ron16	A2	4	RoNi/7.1	VSVG	0.0001	36	2016-09-13 04:46:00	2016-09-13 23:28:00	1177	18.7	Ron16_A2	0.0142999
Ron16_A3_TS4	Ron16	A3	4	RoNi/7.1	VSVG	0.0001	36	2016-09-13 04:46:00	2016-09-13 23:30:00	2595	18.7333	Ron16_A3	0.0315279
Ron16_B2_TS4	Ron16	B2	4	RoNi/7.1	VSVG	0.0001	36	2016-09-13 04:46:00	2016-09-13 23:34:00	1583	18.8	Ron16_B2	0.0192326
Ron16_B1_TS4	Ron16	B1	4	RoNi/7.1	VSVG	0.001	36	2016-09-13 04:46:00	2016-09-13 23:32:00	12911	18.7667	Ron16_B1	0.156862
Ron16_A1_TS5	Ron16	A1	5	RoNi/7.1	VSVG	0.001	36	2016-09-13 04:46:00	2016-09-14 09:41:00	22370	28.9167	Ron16_A1	0.271784
Ron16_A2_TS5	Ron16	A2	5	RoNi/7.1	VSVG	0.0001	36	2016-09-13 04:46:00	2016-09-14 09:43:00	10835	28.95	Ron16_A2	0.13164
Ron16_A3_TS5	Ron16	A3	5	RoNi/7.1	VSVG	0.0001	36	2016-09-13 04:46:00	2016-09-14 09:45:00	14691	28.9833	Ron16_A3	0.178488
Ron16_B2_TS5	Ron16	B2	5	RoNi/7.1	VSVG	0.0001	36	2016-09-13 04:46:00	2016-09-14 09:50:00	15048	29.0667	Ron16_B2	0.182825
Ron16_B1_TS5	Ron16	B1	5	RoNi/7.1	VSVG	0.001	36	2016-09-13 04:46:00	2016-09-14 09:52:00	23260	29.1	Ron16_B1	0.282597
Ron16_A1_TS6	Ron16	A1	6	RoNi/7.1	VSVG	0.001	36	2016-09-13 04:46:00	2016-09-14 18:33:00	9848	37.7833	Ron16_A1	0.119648
Ron16_A2_TS6	Ron16	A2	6	RoNi/7.1	VSVG	0.0001	36	2016-09-13 04:46:00	2016-09-14 18:33:00	11276	37.7833	Ron16_A2	0.136998
Ron16_A3_TS6	Ron16	A3	6	RoNi/7.1	VSVG	0.0001	36	2016-09-13 04:46:00	2016-09-14 18:35:00	13771	37.8167	Ron16_A3	0.167311
Ron16_B2_TS6	Ron16	B2	6	RoNi/7.1	VSVG	0.0001	36	2016-09-13 04:46:00	2016-09-14 18:39:00	15737	37.8833	Ron16_B2	0.191196
Ron16_B1_TS6	Ron16	B1	6	RoNi/7.1	VSVG	0.001	36	2016-09-13 04:46:00	2016-09-14 18:40:00	9254	37.9	Ron16_B1	0.112431
Ron16_A1_TS7	Ron16	A1	7	RoNi/7.1	VSVG	0.001	36	2016-09-13 04:46:00	2016-09-15 08:59:00	1165	52.2167	Ron16_A1	0.0141542
Ron16_A2_TS7	Ron16	A2	7	RoNi/7.1	VSVG	0.0001	36	2016-09-13 04:46:00	2016-09-15 09:00:00	4963	52.2333	Ron16_A2	0.0602979
Ron16_A3_TS7	Ron16	A3	7	RoNi/7.1	VSVG	0.0001	36	2016-09-13 04:46:00	2016-09-15 09:03:00	3000	52.2833	Ron16_A3	0.0364485
Ron16_B2_TS7	Ron16	B2	7	RoNi/7.1	VSVG	0.0001	36	2016-09-13 04:46:00	2016-09-15 09:09:00	3124	52.3833	Ron16_B2	0.037955
Ron16_B1_TS7	Ron16	B1	7	RoNi/7.1	VSVG	0.001	36	2016-09-13 04:46:00	2016-09-15 09:10:00	1182	52.4	Ron16_B1	0.0143607
Ron17_A1_TS1	Ron17	A1	1	RoNi/7.1	MARV	0.001	36	2016-09-20 21:24:00	2016-09-21 04:30:00	155	7.1	Ron17_A1	0.00188317
Ron17_A2_TS1	Ron17	A2	1	RoNi/7.1	MARV	0.0001	36	2016-09-20 21:24:00	2016-09-21 04:33:00	188	7.15	Ron17_A2	0.0022841
Ron17_A3_TS1	Ron17	A3	1	RoNi/7.1	MARV	0.001	36	2016-09-20 21:24:00	2016-09-21 04:36:00	26	7.2	Ron17_A3	0.000315887
Ron17_B2_TS1	Ron17	B2	1	RoNi/7.1	MARV	0.0001	36	2016-09-20 21:24:00	2016-09-21 04:43:00	137	7.31667	Ron17_B2	0.00166448
Ron17_B1_TS1	Ron17	B1	1	RoNi/7.1	MARV	0.001	36	2016-09-20 21:24:00	2016-09-21 04:46:00	313	7.36667	Ron17_B1	0.00380279
Ron17_A1_TS2	Ron17	A1	2	RoNi/7.1	MARV	0.001	36	2016-09-20 21:24:00	2016-09-21 07:37:00	288	10.2167	Ron17_A1	0.00349905
Ron17_A2_TS2	Ron17	A2	2	RoNi/7.1	MARV	0.0001	36	2016-09-20 21:24:00	2016-09-21 07:38:00	242	10.2333	Ron17_A2	0.00294018
Ron17_A3_TS2	Ron17	A3	2	RoNi/7.1	MARV	0.001	36	2016-09-20 21:24:00	2016-09-21 07:39:00	235	10.25	Ron17_A3	0.00285513
Ron17_B2_TS2	Ron17	B2	2	RoNi/7.1	MARV	0.0001	36	2016-09-20 21:24:00	2016-09-21 07:45:00	74	10.35	Ron17_B2	0.000899062
Ron17_B1_TS2	Ron17	B1	2	RoNi/7.1	MARV	0.001	36	2016-09-20 21:24:00	2016-09-21 07:47:00	418	10.3833	Ron17_B1	0.00507849
Ron17_A1_TS3	Ron17	A1	3	RoNi/7.1	MARV	0.001	36	2016-09-20 21:24:00	2016-09-21 12:57:00	1043	15.55	Ron17_A1	0.0126719
Ron17_A2_TS3	Ron17	A2	3	RoNi/7.1	MARV	0.0001	36	2016-09-20 21:24:00	2016-09-21 12:58:00	141	15.5667	Ron17_A2	0.00171308
Ron17_A3_TS3	Ron17	A3	3	RoNi/7.1	MARV	0.001	36	2016-09-20 21:24:00	2016-09-21 12:59:00	827	15.5833	Ron17_A3	0.0100476
Ron17_B2_TS3	Ron17	B2	3	RoNi/7.1	MARV	0.0001	36	2016-09-20 21:24:00	2016-09-21 13:04:00	159	15.6667	Ron17_B2	0.00193177
Ron17_B1_TS3	Ron17	B1	3	RoNi/7.1	MARV	0.001	36	2016-09-20 21:24:00	2016-09-21 13:05:00	965	15.6833	Ron17_B1	0.0117243
Ron17_A1_TS4	Ron17	A1	4	RoNi/7.1	MARV	0.001	36	2016-09-20 21:24:00	2016-09-21 15:40:00	2110	18.2667	Ron17_A1	0.0256354
Ron17_A2_TS4	Ron17	A2	4	RoNi/7.1	MARV	0.0001	36	2016-09-20 21:24:00	2016-09-21 15:41:00	338	18.2833	Ron17_A2	0.00410653
Ron17_A3_TS4	Ron17	A3	4	RoNi/7.1	MARV	0.001	36	2016-09-20 21:24:00	2016-09-21 15:41:00	1577	18.2833	Ron17_A3	0.0191597
Ron17_B2_TS4	Ron17	B2	4	RoNi/7.1	MARV	0.0001	36	2016-09-20 21:24:00	2016-09-21 15:45:00	463	18.35	Ron17_B2	0.00562521
Ron17_B1_TS4	Ron17	B1	4	RoNi/7.1	MARV	0.001	36	2016-09-20 21:24:00	2016-09-21 15:46:00	1884	18.3667	Ron17_B1	0.0228896
Ron17_A1_TS5	Ron17	A1	5	RoNi/7.1	MARV	0.001	36	2016-09-20 21:24:00	2016-09-21 19:20:00	3241	21.9333	Ron17_A1	0.0393765
Ron17_A2_TS5	Ron17	A2	5	RoNi/7.1	MARV	0.0001	36	2016-09-20 21:24:00	2016-09-21 19:21:00	745	21.95	Ron17_A2	0.00905137
Ron17_A3_TS5	Ron17	A3	5	RoNi/7.1	MARV	0.001	36	2016-09-20 21:24:00	2016-09-21 19:22:00	2606	21.9667	Ron17_A3	0.0316616
Ron17_B2_TS5	Ron17	B2	5	RoNi/7.1	MARV	0.0001	36	2016-09-20 21:24:00	2016-09-21 19:27:00	790	22.05	Ron17_B2	0.00959809
Ron17_B1_TS5	Ron17	B1	5	RoNi/7.1	MARV	0.001	36	2016-09-20 21:24:00	2016-09-21 19:28:00	3082	22.0667	Ron17_B1	0.0374447
Ron17_A1_TS6	Ron17	A1	6	RoNi/7.1	MARV	0.001	36	2016-09-20 21:24:00	2016-09-22 08:52:00	14126	35.4667	Ron17_A1	0.171624
Ron17_A2_TS6	Ron17	A2	6	RoNi/7.1	MARV	0.0001	36	2016-09-20 21:24:00	2016-09-22 08:53:00	7503	35.4833	Ron17_A2	0.0911576
Ron17_A3_TS6	Ron17	A3	6	RoNi/7.1	MARV	0.001	36	2016-09-20 21:24:00	2016-09-22 08:54:00	14256	35.5	Ron17_A3	0.173203
Ron17_B2_TS6	Ron17	B2	6	RoNi/7.1	MARV	0.0001	36	2016-09-20 21:24:00	2016-09-22 08:59:00	11813	35.5833	Ron17_B2	0.143522
Ron17_B1_TS6	Ron17	B1	6	RoNi/7.1	MARV	0.001	36	2016-09-20 21:24:00	2016-09-22 09:00:00	16560	35.6	Ron17_B1	0.201196
Ron18_A1_TS1	Ron18	A1	1	RoNi/7.1	MARV	0.001	36	2016-09-20 21:24:00	2016-09-21 05:08:00	415	7.73333	Ron18_A1	0.00504204
Ron18_A2_TS1	Ron18	A2	1	RoNi/7.1	MARV	0.0001	36	2016-09-20 21:24:00	2016-09-21 05:11:00	372	7.78333	Ron18_A2	0.00451961
Ron18_A3_TS1	Ron18	A3	1	RoNi/7.1	MARV	0.001	36	2016-09-20 21:24:00	2016-09-21 05:15:00	207	7.85	Ron18_A3	0.00251494
Ron18_B2_TS1	Ron18	B2	1	RoNi/7.1	MARV	0.0001	36	2016-09-20 21:24:00	2016-09-21 05:21:00	3	7.95	Ron18_B2	3.64485e-05
Ron18_B1_TS1	Ron18	B1	1	RoNi/7.1	MARV	0.001	36	2016-09-20 21:24:00	2016-09-21 05:22:00	179	7.96667	Ron18_B1	0.00217476
Ron18_A1_TS2	Ron18	A1	2	RoNi/7.1	MARV	0.001	36	2016-09-20 21:24:00	2016-09-21 07:59:00	445	10.5833	Ron18_A1	0.00540652
Ron18_A2_TS2	Ron18	A2	2	RoNi/7.1	MARV	0.0001	36	2016-09-20 21:24:00	2016-09-21 08:02:00	47	10.6333	Ron18_A2	0.000571026
Ron18_A3_TS2	Ron18	A3	2	RoNi/7.1	MARV	0.001	36	2016-09-20 21:24:00	2016-09-21 08:03:00	360	10.65	Ron18_A3	0.00437382
Ron18_B2_TS2	Ron18	B2	2	RoNi/7.1	MARV	0.0001	36	2016-09-20 21:24:00	2016-09-21 08:09:00	29	10.75	Ron18_B2	0.000352335
Ron18_B1_TS2	Ron18	B1	2	RoNi/7.1	MARV	0.001	36	2016-09-20 21:24:00	2016-09-21 08:10:00	298	10.7667	Ron18_B1	0.00362055
Ron18_A1_TS3	Ron18	A1	3	RoNi/7.1	MARV	0.001	36	2016-09-20 21:24:00	2016-09-21 13:53:00	1173	16.4833	Ron18_A1	0.0142513
Ron18_A2_TS3	Ron18	A2	3	RoNi/7.1	MARV	0.0001	36	2016-09-20 21:24:00	2016-09-21 13:54:00	255	16.5	Ron18_A2	0.00309812
Ron18_A3_TS3	Ron18	A3	3	RoNi/7.1	MARV	0.001	36	2016-09-20 21:24:00	2016-09-21 13:55:00	1257	16.5167	Ron18_A3	0.0152719
Ron18_B2_TS3	Ron18	B2	3	RoNi/7.1	MARV	0.0001	36	2016-09-20 21:24:00	2016-09-21 13:59:00	295	16.5833	Ron18_B2	0.0035841
Ron18_B1_TS3	Ron18	B1	3	RoNi/7.1	MARV	0.001	36	2016-09-20 21:24:00	2016-09-21 14:00:00	1379	16.6	Ron18_B1	0.0167541
Ron18_A1_TS4	Ron18	A1	4	RoNi/7.1	MARV	0.001	36	2016-09-20 21:24:00	2016-09-21 16:00:00	1818	18.6	Ron18_A1	0.0220878
Ron18_A2_TS4	Ron18	A2	4	RoNi/7.1	MARV	0.0001	36	2016-09-20 21:24:00	2016-09-21 16:01:00	474	18.6167	Ron18_A2	0.00575886
Ron18_A3_TS4	Ron18	A3	4	RoNi/7.1	MARV	0.001	36	2016-09-20 21:24:00	2016-09-21 16:02:00	2030	18.6333	Ron18_A3	0.0246635
Ron18_B2_TS4	Ron18	B2	4	RoNi/7.1	MARV	0.0001	36	2016-09-20 21:24:00	2016-09-21 16:06:00	663	18.7	Ron18_B2	0.00805511
Ron18_B1_TS4	Ron18	B1	4	RoNi/7.1	MARV	0.001	36	2016-09-20 21:24:00	2016-09-21 16:07:00	2065	18.7167	Ron18_B1	0.0250887
Ron18_A1_TS5	Ron18	A1	5	RoNi/7.1	MARV	0.001	36	2016-09-20 21:24:00	2016-09-21 19:38:00	2953	22.2333	Ron18_A1	0.0358774
Ron18_A2_TS5	Ron18	A2	5	RoNi/7.1	MARV	0.0001	36	2016-09-20 21:24:00	2016-09-21 19:39:00	745	22.25	Ron18_A2	0.00905137
Ron18_A3_TS5	Ron18	A3	5	RoNi/7.1	MARV	0.001	36	2016-09-20 21:24:00	2016-09-21 19:40:00	3066	22.2667	Ron18_A3	0.0372503
Ron18_B2_TS5	Ron18	B2	5	RoNi/7.1	MARV	0.0001	36	2016-09-20 21:24:00	2016-09-21 19:44:00	1053	22.3333	Ron18_B2	0.0127934
Ron18_B1_TS5	Ron18	B1	5	RoNi/7.1	MARV	0.001	36	2016-09-20 21:24:00	2016-09-21 19:45:00	3417	22.35	Ron18_B1	0.0415148
Ron18_A1_TS6	Ron18	A1	6	RoNi/7.1	MARV	0.001	36	2016-09-20 21:24:00	2016-09-22 09:14:00	15825	35.8333	Ron18_A1	0.192266
Ron18_A2_TS6	Ron18	A2	6	RoNi/7.1	MARV	0.0001	36	2016-09-20 21:24:00	2016-09-22 09:16:00	8853	35.8667	Ron18_A2	0.107559
Ron18_A3_TS6	Ron18	A3	6	RoNi/7.1	MARV	0.001	36	2016-09-20 21:24:00	2016-09-22 09:18:00	15693	35.9	Ron18_A3	0.190662
Ron18_B2_TS6	Ron18	B2	6	RoNi/7.1	MARV	0.0001	36	2016-09-20 21:24:00	2016-09-22 09:23:00	10972	35.9833	Ron18_B2	0.133304
Ron18_B1_TS6	Ron18	B1	6	RoNi/7.1	MARV	0.001	36	2016-09-20 21:24:00	2016-09-22 09:25:00	17657	36.0167	Ron18_B1	0.214523
Ron18_A1_TS7	Ron18	A1	7	RoNi/7.1	MARV	0.001	36	2016-09-20 21:24:00	2016-09-22 19:59:00	14442	46.5833	Ron18_A1	0.175463
Ron18_A2_TS7	Ron18	A2	7	RoNi/7.1	MARV	0.0001	36	2016-09-20 21:24:00	2016-09-22 20:00:00	17023	46.6	Ron18_A2	0.206821
Ron18_A3_TS7	Ron18	A3	7	RoNi/7.1	MARV	0.001	36	2016-09-20 21:24:00	2016-09-22 20:01:00	15474	46.6167	Ron18_A3	0.188001
Ron18_B2_TS7	Ron18	B2	7	RoNi/7.1	MARV	0.0001	36	2016-09-20 21:24:00	2016-09-22 20:07:00	17191	46.7167	Ron18_B2	0.208862
Ron18_B1_TS7	Ron18	B1	7	RoNi/7.1	MARV	0.001	36	2016-09-20 21:24:00	2016-09-22 20:08:00	13278	46.7333	Ron18_B1	0.161321
Ron18_A1_TS8	Ron18	A1	8	RoNi/7.1	MARV	0.001	36	2016-09-20 21:24:00	2016-09-23 05:01:00	6181	55.6167	Ron18_A1	0.075096
Ron18_A2_TS8	Ron18	A2	8	RoNi/7.1	MARV	0.0001	36	2016-09-20 21:24:00	2016-09-23 05:02:00	9157	55.6333	Ron18_A2	0.111253
Ron18_A3_TS8	Ron18	A3	8	RoNi/7.1	MARV	0.001	36	2016-09-20 21:24:00	2016-09-23 05:03:00	5346	55.65	Ron18_A3	0.0649512
Ron18_B2_TS8	Ron18	B2	8	RoNi/7.1	MARV	0.0001	36	2016-09-20 21:24:00	2016-09-23 05:07:00	8160	55.7167	Ron18_B2	0.0991398
Ron18_B1_TS8	Ron18	B1	8	RoNi/7.1	MARV	0.001	36	2016-09-20 21:24:00	2016-09-23 05:08:00	4764	55.7333	Ron18_B1	0.0578802
Ron18_A1_TS9	Ron18	A1	9	RoNi/7.1	MARV	0.001	36	2016-09-20 21:24:00	2016-09-24 10:31:00	637	85.1167	Ron18_A1	0.00773922
Ron18_A2_TS9	Ron18	A2	9	RoNi/7.1	MARV	0.0001	36	2016-09-20 21:24:00	2016-09-24 10:34:00	774	85.1667	Ron18_A2	0.0094037
Ron18_A3_TS9	Ron18	A3	9	RoNi/7.1	MARV	0.001	36	2016-09-20 21:24:00	2016-09-24 10:36:00	321	85.2	Ron18_A3	0.00389999
Ron18_B2_TS9	Ron18	B2	9	RoNi/7.1	MARV	0.0001	36	2016-09-20 21:24:00	2016-09-24 10:42:00	816	85.3	Ron18_B2	0.00991398
Ron18_B1_TS9	Ron18	B1	9	RoNi/7.1	MARV	0.001	36	2016-09-20 21:24:00	2016-09-24 10:43:00	589	85.3167	Ron18_B1	0.00715605
Ron19_A1_TS1	Ron19	A1	1	RoNi/7.1	MARV	0.001	36	2016-09-20 21:24:00	2016-09-21 05:46:00	171	8.36667	Ron19_A1	0.00207756
Ron19_A2_TS1	Ron19	A2	1	RoNi/7.1	MARV	0.0001	36	2016-09-20 21:24:00	2016-09-21 05:48:00	185	8.4	Ron19_A2	0.00224766
Ron19_A3_TS1	Ron19	A3	1	RoNi/7.1	MARV	0.0001	36	2016-09-20 21:24:00	2016-09-21 05:52:00	70	8.46667	Ron19_A3	0.000850464
Ron19_B2_TS1	Ron19	B2	1	RoNi/7.1	MARV	0.0001	36	2016-09-20 21:24:00	2016-09-21 05:59:00	2	8.58333	Ron19_B2	2.4299e-05
Ron19_B1_TS1	Ron19	B1	1	RoNi/7.1	MARV	0.001	36	2016-09-20 21:24:00	2016-09-21 05:59:00	254	8.58333	Ron19_B1	0.00308597
Ron19_A1_TS2	Ron19	A1	2	RoNi/7.1	MARV	0.001	36	2016-09-20 21:24:00	2016-09-21 08:26:00	418	11.0333	Ron19_A1	0.00507849
Ron19_A2_TS2	Ron19	A2	2	RoNi/7.1	MARV	0.0001	36	2016-09-20 21:24:00	2016-09-21 08:29:00	23	11.0833	Ron19_A2	0.000279438
Ron19_A3_TS2	Ron19	A3	2	RoNi/7.1	MARV	0.0001	36	2016-09-20 21:24:00	2016-09-21 08:32:00	25	11.1333	Ron19_A3	0.000303737
Ron19_B2_TS2	Ron19	B2	2	RoNi/7.1	MARV	0.0001	36	2016-09-20 21:24:00	2016-09-21 08:39:00	45	11.25	Ron19_B2	0.000546727
Ron19_B1_TS2	Ron19	B1	2	RoNi/7.1	MARV	0.001	36	2016-09-20 21:24:00	2016-09-21 08:40:00	433	11.2667	Ron19_B1	0.00526073
Ron19_A1_TS3	Ron19	A1	3	RoNi/7.1	MARV	0.001	36	2016-09-20 21:24:00	2016-09-21 13:41:00	1571	16.2833	Ron19_A1	0.0190868
Ron19_A2_TS3	Ron19	A2	3	RoNi/7.1	MARV	0.0001	36	2016-09-20 21:24:00	2016-09-21 13:42:00	190	16.3	Ron19_A2	0.0023084
Ron19_A3_TS3	Ron19	A3	3	RoNi/7.1	MARV	0.0001	36	2016-09-20 21:24:00	2016-09-21 13:44:00	115	16.3333	Ron19_A3	0.00139719
Ron19_B2_TS3	Ron19	B2	3	RoNi/7.1	MARV	0.0001	36	2016-09-20 21:24:00	2016-09-21 13:49:00	303	16.4167	Ron19_B2	0.00368129
Ron19_B1_TS3	Ron19	B1	3	RoNi/7.1	MARV	0.001	36	2016-09-20 21:24:00	2016-09-21 13:50:00	1494	16.4333	Ron19_B1	0.0181513
Ron19_A1_TS4	Ron19	A1	4	RoNi/7.1	MARV	0.001	36	2016-09-20 21:24:00	2016-09-21 16:16:00	2034	18.8667	Ron19_A1	0.0247121
Ron19_A2_TS4	Ron19	A2	4	RoNi/7.1	MARV	0.0001	36	2016-09-20 21:24:00	2016-09-21 16:17:00	526	18.8833	Ron19_A2	0.00639063
Ron19_A3_TS4	Ron19	A3	4	RoNi/7.1	MARV	0.0001	36	2016-09-20 21:24:00	2016-09-21 16:18:00	237	18.9	Ron19_A3	0.00287943
Ron19_B2_TS4	Ron19	B2	4	RoNi/7.1	MARV	0.0001	36	2016-09-20 21:24:00	2016-09-21 16:23:00	642	18.9833	Ron19_B2	0.00779997
Ron19_B1_TS4	Ron19	B1	4	RoNi/7.1	MARV	0.001	36	2016-09-20 21:24:00	2016-09-21 16:23:00	2515	18.9833	Ron19_B1	0.030556
Ron19_A1_TS5	Ron19	A1	5	RoNi/7.1	MARV	0.001	36	2016-09-20 21:24:00	2016-09-21 19:54:00	3069	22.5	Ron19_A1	0.0372868
Ron19_A2_TS5	Ron19	A2	5	RoNi/7.1	MARV	0.0001	36	2016-09-20 21:24:00	2016-09-21 19:55:00	918	22.5167	Ron19_A2	0.0111532
Ron19_A3_TS5	Ron19	A3	5	RoNi/7.1	MARV	0.0001	36	2016-09-20 21:24:00	2016-09-21 19:56:00	508	22.5333	Ron19_A3	0.00617194
Ron19_B2_TS5	Ron19	B2	5	RoNi/7.1	MARV	0.0001	36	2016-09-20 21:24:00	2016-09-21 20:00:00	1004	22.6	Ron19_B2	0.0121981
Ron19_B1_TS5	Ron19	B1	5	RoNi/7.1	MARV	0.001	36	2016-09-20 21:24:00	2016-09-21 20:01:00	4376	22.6167	Ron19_B1	0.0531662
Ron19_A1_TS6	Ron19	A1	6	RoNi/7.1	MARV	0.001	36	2016-09-20 21:24:00	2016-09-22 09:36:00	19287	36.2	Ron19_A1	0.234327
Ron19_A2_TS6	Ron19	A2	6	RoNi/7.1	MARV	0.0001	36	2016-09-20 21:24:00	2016-09-22 09:37:00	9146	36.2167	Ron19_A2	0.111119
Ron19_A3_TS6	Ron19	A3	6	RoNi/7.1	MARV	0.0001	36	2016-09-20 21:24:00	2016-09-22 09:39:00	3943	36.25	Ron19_A3	0.0479054
Ron19_B2_TS6	Ron19	B2	6	RoNi/7.1	MARV	0.0001	36	2016-09-20 21:24:00	2016-09-22 09:43:00	12129	36.3167	Ron19_B2	0.147361
Ron19_B1_TS6	Ron19	B1	6	RoNi/7.1	MARV	0.001	36	2016-09-20 21:24:00	2016-09-22 09:45:00	22230	36.35	Ron19_B1	0.270083
Ron19_A1_TS7	Ron19	A1	7	RoNi/7.1	MARV	0.001	36	2016-09-20 21:24:00	2016-09-22 20:20:00	15803	46.9333	Ron19_A1	0.191998
Ron19_A2_TS7	Ron19	A2	7	RoNi/7.1	MARV	0.0001	36	2016-09-20 21:24:00	2016-09-22 20:21:00	16048	46.95	Ron19_A2	0.194975
Ron19_A3_TS7	Ron19	A3	7	RoNi/7.1	MARV	0.0001	36	2016-09-20 21:24:00	2016-09-22 20:22:00	11102	46.9667	Ron19_A3	0.134884
Ron19_B2_TS7	Ron19	B2	7	RoNi/7.1	MARV	0.0001	36	2016-09-20 21:24:00	2016-09-22 20:26:00	15358	47.0333	Ron19_B2	0.186592
Ron19_B1_TS7	Ron19	B1	7	RoNi/7.1	MARV	0.001	36	2016-09-20 21:24:00	2016-09-22 20:26:00	11990	47.0333	Ron19_B1	0.145672
Ron19_A1_TS8	Ron19	A1	8	RoNi/7.1	MARV	0.001	36	2016-09-20 21:24:00	2016-09-23 05:19:00	7486	55.9167	Ron19_A1	0.0909511
Ron19_A2_TS8	Ron19	A2	8	RoNi/7.1	MARV	0.0001	36	2016-09-20 21:24:00	2016-09-23 05:21:00	11907	55.95	Ron19_A2	0.144664
Ron19_A3_TS8	Ron19	A3	8	RoNi/7.1	MARV	0.0001	36	2016-09-20 21:24:00	2016-09-23 05:22:00	11703	55.9667	Ron19_A3	0.142185
Ron19_B2_TS8	Ron19	B2	8	RoNi/7.1	MARV	0.0001	36	2016-09-20 21:24:00	2016-09-23 05:27:00	7819	56.05	Ron19_B2	0.0949968
Ron19_B1_TS8	Ron19	B1	8	RoNi/7.1	MARV	0.001	36	2016-09-20 21:24:00	2016-09-23 05:28:00	3829	56.0667	Ron19_B1	0.0465204
Ron2_A1_TS1	Ron2	A1	1	RoNi/7.1	EBOV	0.001	36	2016-09-06 05:21:00	2016-09-06 12:22:00	0	7.01667	Ron2_A1	0
Ron2_A2_TS1	Ron2	A2	1	RoNi/7.1	EBOV	0.0001	36	2016-09-06 05:21:00	2016-09-06 12:27:00	121	7.1	Ron2_A2	0.00147009
Ron2_A3_TS1	Ron2	A3	1	RoNi/7.1	EBOV	0.001	36	2016-09-06 05:21:00	2016-09-06 12:30:00	47	7.15	Ron2_A3	0.000571026
Ron2_B2_TS1	Ron2	B2	1	RoNi/7.1	EBOV	0.0001	36	2016-09-06 05:21:00	2016-09-06 12:39:00	28	7.3	Ron2_B2	0.000340186
Ron2_B1_TS1	Ron2	B1	1	RoNi/7.1	EBOV	0.001	36	2016-09-06 05:21:00	2016-09-06 12:40:00	0	7.31667	Ron2_B1	0
Ron2_A1_TS2	Ron2	A1	2	RoNi/7.1	EBOV	0.001	36	2016-09-06 05:21:00	2016-09-06 16:25:00	174	11.0667	Ron2_A1	0.00211401
Ron2_A2_TS2	Ron2	A2	2	RoNi/7.1	EBOV	0.0001	36	2016-09-06 05:21:00	2016-09-06 16:27:00	51	11.1	Ron2_A2	0.000619624
Ron2_A3_TS2	Ron2	A3	2	RoNi/7.1	EBOV	0.001	36	2016-09-06 05:21:00	2016-09-06 16:29:00	227	11.1333	Ron2_A3	0.00275793
Ron2_B2_TS2	Ron2	B2	2	RoNi/7.1	EBOV	0.0001	36	2016-09-06 05:21:00	2016-09-06 16:36:00	2	11.25	Ron2_B2	2.4299e-05
Ron2_B1_TS2	Ron2	B1	2	RoNi/7.1	EBOV	0.001	36	2016-09-06 05:21:00	2016-09-06 16:37:00	224	11.2667	Ron2_B1	0.00272149
Ron2_A1_TS3	Ron2	A1	3	RoNi/7.1	EBOV	0.001	36	2016-09-06 05:21:00	2016-09-06 21:06:00	325	15.75	Ron2_A1	0.00394858
Ron2_A2_TS3	Ron2	A2	3	RoNi/7.1	EBOV	0.0001	36	2016-09-06 05:21:00	2016-09-06 21:07:00	27	15.7667	Ron2_A2	0.000328036
Ron2_A3_TS3	Ron2	A3	3	RoNi/7.1	EBOV	0.001	36	2016-09-06 05:21:00	2016-09-06 21:11:00	405	15.8333	Ron2_A3	0.00492054
Ron2_B2_TS3	Ron2	B2	3	RoNi/7.1	EBOV	0.0001	36	2016-09-06 05:21:00	2016-09-06 21:15:00	29	15.9	Ron2_B2	0.000352335
Ron2_B1_TS3	Ron2	B1	3	RoNi/7.1	EBOV	0.001	36	2016-09-06 05:21:00	2016-09-06 21:16:00	308	15.9167	Ron2_B1	0.00374204
Ron2_A1_TS4	Ron2	A1	4	RoNi/7.1	EBOV	0.001	36	2016-09-06 05:21:00	2016-09-07 07:09:00	900	25.8	Ron2_A1	0.0109345
Ron2_A2_TS4	Ron2	A2	4	RoNi/7.1	EBOV	0.0001	36	2016-09-06 05:21:00	2016-09-07 07:10:00	254	25.8167	Ron2_A2	0.00308597
Ron2_A3_TS4	Ron2	A3	4	RoNi/7.1	EBOV	0.001	36	2016-09-06 05:21:00	2016-09-07 07:12:00	1249	25.85	Ron2_A3	0.0151747
Ron2_B2_TS4	Ron2	B2	4	RoNi/7.1	EBOV	0.0001	36	2016-09-06 05:21:00	2016-09-07 07:17:00	174	25.9333	Ron2_B2	0.00211401
Ron2_B1_TS4	Ron2	B1	4	RoNi/7.1	EBOV	0.001	36	2016-09-06 05:21:00	2016-09-07 07:17:00	944	25.9333	Ron2_B1	0.0114691
Ron2_A1_TS5	Ron2	A1	5	RoNi/7.1	EBOV	0.001	36	2016-09-06 05:21:00	2016-09-07 17:53:00	3218	36.5333	Ron2_A1	0.0390971
Ron2_A2_TS5	Ron2	A2	5	RoNi/7.1	EBOV	0.0001	36	2016-09-06 05:21:00	2016-09-07 17:54:00	1215	36.55	Ron2_A2	0.0147616
Ron2_A3_TS5	Ron2	A3	5	RoNi/7.1	EBOV	0.001	36	2016-09-06 05:21:00	2016-09-07 17:55:00	3639	36.5667	Ron2_A3	0.044212
Ron2_B2_TS5	Ron2	B2	5	RoNi/7.1	EBOV	0.0001	36	2016-09-06 05:21:00	2016-09-07 17:58:00	1133	36.6167	Ron2_B2	0.0137654
Ron2_B1_TS5	Ron2	B1	5	RoNi/7.1	EBOV	0.001	36	2016-09-06 05:21:00	2016-09-07 17:59:00	3544	36.6333	Ron2_B1	0.0430578
Ron2_A1_TS6	Ron2	A1	6	RoNi/7.1	EBOV	0.001	36	2016-09-06 05:21:00	2016-09-08 08:47:00	7577	51.4333	Ron2_A1	0.0920567
Ron2_A2_TS6	Ron2	A2	6	RoNi/7.1	EBOV	0.0001	36	2016-09-06 05:21:00	2016-09-08 08:48:00	3855	51.45	Ron2_A2	0.0468363
Ron2_A3_TS6	Ron2	A3	6	RoNi/7.1	EBOV	0.001	36	2016-09-06 05:21:00	2016-09-08 08:49:00	8402	51.4667	Ron2_A3	0.10208
Ron2_B2_TS6	Ron2	B2	6	RoNi/7.1	EBOV	0.0001	36	2016-09-06 05:21:00	2016-09-08 08:54:00	4081	51.55	Ron2_B2	0.0495821
Ron2_B1_TS6	Ron2	B1	6	RoNi/7.1	EBOV	0.001	36	2016-09-06 05:21:00	2016-09-08 08:56:00	9574	51.5833	Ron2_B1	0.116319
Ron2_A1_TS7	Ron2	A1	7	RoNi/7.1	EBOV	0.001	36	2016-09-06 05:21:00	2016-09-12 15:14:00	94	153.883	Ron2_A1	0.00114205
Ron2_A2_TS7	Ron2	A2	7	RoNi/7.1	EBOV	0.0001	36	2016-09-06 05:21:00	2016-09-12 15:17:00	247	153.933	Ron2_A2	0.00300092
Ron2_A3_TS7	Ron2	A3	7	RoNi/7.1	EBOV	0.001	36	2016-09-06 05:21:00	2016-09-12 15:20:00	2137	153.983	Ron2_A3	0.0259635
Ron2_B2_TS7	Ron2	B2	7	RoNi/7.1	EBOV	0.0001	36	2016-09-06 05:21:00	2016-09-12 15:29:00	247	154.133	Ron2_B2	0.00300092
Ron2_B1_TS7	Ron2	B1	7	RoNi/7.1	EBOV	0.001	36	2016-09-06 05:21:00	2016-09-12 15:33:00	309	154.2	Ron2_B1	0.00375419
Ron20_A1_TS1	Ron20	A1	1	RoNi/7.1	MARV	0.001	36	2016-09-20 21:24:00	2016-09-21 06:16:00	244	8.86667	Ron20_A1	0.00296447
Ron20_A2_TS1	Ron20	A2	1	RoNi/7.1	MARV	0.0001	36	2016-09-20 21:24:00	2016-09-21 06:20:00	143	8.93333	Ron20_A2	0.00173738
Ron20_A3_TS1	Ron20	A3	1	RoNi/7.1	MARV	0.0001	36	2016-09-20 21:24:00	2016-09-21 06:23:00	174	8.98333	Ron20_A3	0.00211401
Ron20_B2_TS1	Ron20	B2	1	RoNi/7.1	MARV	0.0001	36	2016-09-20 21:24:00	2016-09-21 06:30:00	47	9.1	Ron20_B2	0.000571026
Ron20_B1_TS1	Ron20	B1	1	RoNi/7.1	MARV	0.001	36	2016-09-20 21:24:00	2016-09-21 06:31:00	263	9.11667	Ron20_B1	0.00319532
Ron20_A1_TS2	Ron20	A1	2	RoNi/7.1	MARV	0.001	36	2016-09-20 21:24:00	2016-09-21 08:52:00	386	11.4667	Ron20_A1	0.0046897
Ron20_A2_TS2	Ron20	A2	2	RoNi/7.1	MARV	0.0001	36	2016-09-20 21:24:00	2016-09-21 08:53:00	62	11.4833	Ron20_A2	0.000753268
Ron20_A3_TS2	Ron20	A3	2	RoNi/7.1	MARV	0.0001	36	2016-09-20 21:24:00	2016-09-21 08:56:00	18	11.5333	Ron20_A3	0.000218691
Ron20_B2_TS2	Ron20	B2	2	RoNi/7.1	MARV	0.0001	36	2016-09-20 21:24:00	2016-09-21 09:03:00	19	11.65	Ron20_B2	0.00023084
Ron20_B1_TS2	Ron20	B1	2	RoNi/7.1	MARV	0.001	36	2016-09-20 21:24:00	2016-09-21 09:04:00	437	11.6667	Ron20_B1	0.00530933
Ron20_A1_TS3	Ron20	A1	3	RoNi/7.1	MARV	0.001	36	2016-09-20 21:24:00	2016-09-21 14:22:00	1354	16.9667	Ron20_A1	0.0164504
Ron20_A2_TS3	Ron20	A2	3	RoNi/7.1	MARV	0.0001	36	2016-09-20 21:24:00	2016-09-21 14:23:00	237	16.9833	Ron20_A2	0.00287943
Ron20_A3_TS3	Ron20	A3	3	RoNi/7.1	MARV	0.0001	36	2016-09-20 21:24:00	2016-09-21 14:24:00	248	17	Ron20_A3	0.00301307
Ron20_B2_TS3	Ron20	B2	3	RoNi/7.1	MARV	0.0001	36	2016-09-20 21:24:00	2016-09-21 14:28:00	283	17.0667	Ron20_B2	0.0034383
Ron20_B1_TS3	Ron20	B1	3	RoNi/7.1	MARV	0.001	36	2016-09-20 21:24:00	2016-09-21 14:29:00	1532	17.0833	Ron20_B1	0.018613
Ron20_A1_TS4	Ron20	A1	4	RoNi/7.1	MARV	0.001	36	2016-09-20 21:24:00	2016-09-21 16:35:00	1858	19.1833	Ron20_A1	0.0225737
Ron20_A2_TS4	Ron20	A2	4	RoNi/7.1	MARV	0.0001	36	2016-09-20 21:24:00	2016-09-21 16:36:00	340	19.2	Ron20_A2	0.00413083
Ron20_A3_TS4	Ron20	A3	4	RoNi/7.1	MARV	0.0001	36	2016-09-20 21:24:00	2016-09-21 16:38:00	351	19.2333	Ron20_A3	0.00426447
Ron20_B2_TS4	Ron20	B2	4	RoNi/7.1	MARV	0.0001	36	2016-09-20 21:24:00	2016-09-21 16:42:00	342	19.3	Ron20_B2	0.00415512
Ron20_B1_TS4	Ron20	B1	4	RoNi/7.1	MARV	0.001	36	2016-09-20 21:24:00	2016-09-21 16:43:00	2192	19.3167	Ron20_B1	0.0266317
Ron20_A1_TS5	Ron20	A1	5	RoNi/7.1	MARV	0.001	36	2016-09-20 21:24:00	2016-09-21 20:11:00	3092	22.7833	Ron20_A1	0.0375662
Ron20_A2_TS5	Ron20	A2	5	RoNi/7.1	MARV	0.0001	36	2016-09-20 21:24:00	2016-09-21 20:12:00	721	22.8	Ron20_A2	0.00875978
Ron20_A3_TS5	Ron20	A3	5	RoNi/7.1	MARV	0.0001	36	2016-09-20 21:24:00	2016-09-21 20:12:00	652	22.8	Ron20_A3	0.00792147
Ron20_B2_TS5	Ron20	B2	5	RoNi/7.1	MARV	0.0001	36	2016-09-20 21:24:00	2016-09-21 20:16:00	759	22.8667	Ron20_B2	0.00922146
Ron20_B1_TS5	Ron20	B1	5	RoNi/7.1	MARV	0.001	36	2016-09-20 21:24:00	2016-09-21 20:17:00	3469	22.8833	Ron20_B1	0.0421466
Ron20_A1_TS6	Ron20	A1	6	RoNi/7.1	MARV	0.001	36	2016-09-20 21:24:00	2016-09-22 09:56:00	16493	36.5333	Ron20_A1	0.200381
Ron20_A2_TS6	Ron20	A2	6	RoNi/7.1	MARV	0.0001	36	2016-09-20 21:24:00	2016-09-22 09:58:00	7176	36.5667	Ron20_A2	0.0871847
Ron20_A3_TS6	Ron20	A3	6	RoNi/7.1	MARV	0.0001	36	2016-09-20 21:24:00	2016-09-22 09:59:00	5126	36.5833	Ron20_A3	0.0622783
Ron20_B2_TS6	Ron20	B2	6	RoNi/7.1	MARV	0.0001	36	2016-09-20 21:24:00	2016-09-22 10:03:00	8004	36.65	Ron20_B2	0.0972445
Ron20_B1_TS6	Ron20	B1	6	RoNi/7.1	MARV	0.001	36	2016-09-20 21:24:00	2016-09-22 10:04:00	19306	36.6667	Ron20_B1	0.234558
Ron20_A1_TS7	Ron20	A1	7	RoNi/7.1	MARV	0.001	36	2016-09-20 21:24:00	2016-09-22 20:37:00	10389	47.2167	Ron20_A1	0.126221
Ron20_A2_TS7	Ron20	A2	7	RoNi/7.1	MARV	0.0001	36	2016-09-20 21:24:00	2016-09-22 20:39:00	14031	47.25	Ron20_A2	0.170469
Ron20_A3_TS7	Ron20	A3	7	RoNi/7.1	MARV	0.0001	36	2016-09-20 21:24:00	2016-09-22 20:40:00	10840	47.2667	Ron20_A3	0.1317
Ron20_B2_TS7	Ron20	B2	7	RoNi/7.1	MARV	0.0001	36	2016-09-20 21:24:00	2016-09-22 20:45:00	14342	47.35	Ron20_B2	0.174248
Ron20_B1_TS7	Ron20	B1	7	RoNi/7.1	MARV	0.001	36	2016-09-20 21:24:00	2016-09-22 20:47:00	10111	47.3833	Ron20_B1	0.122843
Ron20_A1_TS8	Ron20	A1	8	RoNi/7.1	MARV	0.001	36	2016-09-20 21:24:00	2016-09-23 05:40:00	4155	56.2667	Ron20_A1	0.0504811
Ron20_A2_TS8	Ron20	A2	8	RoNi/7.1	MARV	0.0001	36	2016-09-20 21:24:00	2016-09-23 05:41:00	9254	56.2833	Ron20_A2	0.112431
Ron20_A3_TS8	Ron20	A3	8	RoNi/7.1	MARV	0.0001	36	2016-09-20 21:24:00	2016-09-23 05:42:00	9919	56.3	Ron20_A3	0.120511
Ron20_B2_TS8	Ron20	B2	8	RoNi/7.1	MARV	0.0001	36	2016-09-20 21:24:00	2016-09-23 05:46:00	7956	56.3667	Ron20_B2	0.0966613
Ron20_B1_TS8	Ron20	B1	8	RoNi/7.1	MARV	0.001	36	2016-09-20 21:24:00	2016-09-23 05:48:00	3344	56.4	Ron20_B1	0.0406279
Ron20_A1_TS9	Ron20	A1	9	RoNi/7.1	MARV	0.001	36	2016-09-20 21:24:00	2016-09-24 11:26:00	593	86.0333	Ron20_A1	0.00720465
Ron20_A2_TS9	Ron20	A2	9	RoNi/7.1	MARV	0.0001	36	2016-09-20 21:24:00	2016-09-24 11:28:00	1148	86.0667	Ron20_A2	0.0139476
Ron20_A3_TS9	Ron20	A3	9	RoNi/7.1	MARV	0.0001	36	2016-09-20 21:24:00	2016-09-24 11:30:00	610	86.1	Ron20_A3	0.00741119
Ron20_B2_TS9	Ron20	B2	9	RoNi/7.1	MARV	0.0001	36	2016-09-20 21:24:00	2016-09-24 11:36:00	776	86.2	Ron20_B2	0.009428
Ron20_B1_TS9	Ron20	B1	9	RoNi/7.1	MARV	0.001	36	2016-09-20 21:24:00	2016-09-24 11:38:00	1029	86.2333	Ron20_B1	0.0125018
Ron20_A1_TS10	Ron20	A1	10	RoNi/7.1	MARV	0.001	36	2016-09-20 21:24:00	2016-09-24 23:51:00	1027	98.45	Ron20_A1	0.0124775
Ron20_A2_TS10	Ron20	A2	10	RoNi/7.1	MARV	0.0001	36	2016-09-20 21:24:00	2016-09-24 23:53:00	491	98.4833	Ron20_A2	0.0059654
Ron20_A3_TS10	Ron20	A3	10	RoNi/7.1	MARV	0.0001	36	2016-09-20 21:24:00	2016-09-24 23:55:00	130	98.5167	Ron20_A3	0.00157943
Ron20_B2_TS10	Ron20	B2	10	RoNi/7.1	MARV	0.0001	36	2016-09-20 21:24:00	2016-09-25 00:03:00	658	98.65	Ron20_B2	0.00799436
Ron20_B1_TS10	Ron20	B1	10	RoNi/7.1	MARV	0.001	36	2016-09-20 21:24:00	2016-09-25 00:07:00	1467	98.7167	Ron20_B1	0.0178233
Ron21_A1_TS1	Ron21	A1	1	RoNi/7.1	MARV	0.001	36	2016-09-24 07:51:00	2016-09-24 14:38:00	168	6.78333	Ron21_A1	0.00204111
Ron21_A2_TS1	Ron21	A2	1	RoNi/7.1	MARV	0.0001	36	2016-09-24 07:51:00	2016-09-24 14:41:00	0	6.83333	Ron21_A2	0
Ron21_A3_TS1	Ron21	A3	1	RoNi/7.1	MARV	0.001	36	2016-09-24 07:51:00	2016-09-24 14:45:00	114	6.9	Ron21_A3	0.00138504
Ron21_B2_TS1	Ron21	B2	1	RoNi/7.1	MARV	0.0001	36	2016-09-24 07:51:00	2016-09-24 14:51:00	104	7	Ron21_B2	0.00126355
Ron21_B1_TS1	Ron21	B1	1	RoNi/7.1	MARV	0.001	36	2016-09-24 07:51:00	2016-09-24 14:53:00	9	7.03333	Ron21_B1	0.000109345
Ron21_A1_TS2	Ron21	A1	2	RoNi/7.1	MARV	0.001	36	2016-09-24 07:51:00	2016-09-24 18:19:00	214	10.4667	Ron21_A1	0.00259999
Ron21_A2_TS2	Ron21	A2	2	RoNi/7.1	MARV	0.0001	36	2016-09-24 07:51:00	2016-09-24 18:22:00	144	10.5167	Ron21_A2	0.00174953
Ron21_A3_TS2	Ron21	A3	2	RoNi/7.1	MARV	0.001	36	2016-09-24 07:51:00	2016-09-24 18:23:00	218	10.5333	Ron21_A3	0.00264859
Ron21_B2_TS2	Ron21	B2	2	RoNi/7.1	MARV	0.0001	36	2016-09-24 07:51:00	2016-09-24 18:29:00	16	10.6333	Ron21_B2	0.000194392
Ron21_B1_TS2	Ron21	B1	2	RoNi/7.1	MARV	0.001	36	2016-09-24 07:51:00	2016-09-24 18:30:00	369	10.65	Ron21_B1	0.00448316
Ron21_A1_TS3	Ron21	A1	3	RoNi/7.1	MARV	0.001	36	2016-09-24 07:51:00	2016-09-24 21:15:00	484	13.4	Ron21_A1	0.00588035
Ron21_A2_TS3	Ron21	A2	3	RoNi/7.1	MARV	0.0001	36	2016-09-24 07:51:00	2016-09-24 21:17:00	33	13.4333	Ron21_A2	0.000400933
Ron21_A3_TS3	Ron21	A3	3	RoNi/7.1	MARV	0.001	36	2016-09-24 07:51:00	2016-09-24 21:18:00	429	13.45	Ron21_A3	0.00521213
Ron21_B2_TS3	Ron21	B2	3	RoNi/7.1	MARV	0.0001	36	2016-09-24 07:51:00	2016-09-24 21:26:00	34	13.5833	Ron21_B2	0.000413083
Ron21_B1_TS3	Ron21	B1	3	RoNi/7.1	MARV	0.001	36	2016-09-24 07:51:00	2016-09-24 21:27:00	412	13.6	Ron21_B1	0.00500559
Ron21_A1_TS4	Ron21	A1	4	RoNi/7.1	MARV	0.001	36	2016-09-24 07:51:00	2016-09-25 00:45:00	1048	16.9	Ron21_A1	0.0127327
Ron21_A2_TS4	Ron21	A2	4	RoNi/7.1	MARV	0.0001	36	2016-09-24 07:51:00	2016-09-25 00:46:00	63	16.9167	Ron21_A2	0.000765418
Ron21_A3_TS4	Ron21	A3	4	RoNi/7.1	MARV	0.001	36	2016-09-24 07:51:00	2016-09-25 00:47:00	808	16.9333	Ron21_A3	0.00981679
Ron21_B2_TS4	Ron21	B2	4	RoNi/7.1	MARV	0.0001	36	2016-09-24 07:51:00	2016-09-25 00:52:00	262	17.0167	Ron21_B2	0.00318317
Ron21_B1_TS4	Ron21	B1	4	RoNi/7.1	MARV	0.001	36	2016-09-24 07:51:00	2016-09-25 00:53:00	752	17.0333	Ron21_B1	0.00913641
Ron21_A1_TS5	Ron21	A1	5	RoNi/7.1	MARV	0.001	36	2016-09-24 07:51:00	2016-09-25 10:01:00	3422	26.1667	Ron21_A1	0.0415755
Ron21_A2_TS5	Ron21	A2	5	RoNi/7.1	MARV	0.0001	36	2016-09-24 07:51:00	2016-09-25 10:02:00	786	26.1833	Ron21_A2	0.0095495
Ron21_A3_TS5	Ron21	A3	5	RoNi/7.1	MARV	0.001	36	2016-09-24 07:51:00	2016-09-25 10:03:00	2818	26.2	Ron21_A3	0.0342373
Ron21_B2_TS5	Ron21	B2	5	RoNi/7.1	MARV	0.0001	36	2016-09-24 07:51:00	2016-09-25 10:07:00	1495	26.2667	Ron21_B2	0.0181635
Ron21_B1_TS5	Ron21	B1	5	RoNi/7.1	MARV	0.001	36	2016-09-24 07:51:00	2016-09-25 10:08:00	3648	26.2833	Ron21_B1	0.0443213
Ron22_A1_TS1	Ron22	A1	1	RoNi/7.1	MARV	0.001	36	2016-09-24 07:51:00	2016-09-24 15:47:00	22	7.93333	Ron22_A1	0.000267289
Ron22_A2_TS1	Ron22	A2	1	RoNi/7.1	MARV	0.0001	36	2016-09-24 07:51:00	2016-09-24 15:49:00	29	7.96667	Ron22_A2	0.000352335
Ron22_A3_TS1	Ron22	A3	1	RoNi/7.1	MARV	0.001	36	2016-09-24 07:51:00	2016-09-24 15:53:00	21	8.03333	Ron22_A3	0.000255139
Ron22_B2_TS1	Ron22	B2	1	RoNi/7.1	MARV	0.0001	36	2016-09-24 07:51:00	2016-09-24 16:00:00	119	8.15	Ron22_B2	0.00144579
Ron22_B1_TS1	Ron22	B1	1	RoNi/7.1	MARV	0.001	36	2016-09-24 07:51:00	2016-09-24 16:05:00	165	8.23333	Ron22_B1	0.00200467
Ron22_A1_TS2	Ron22	A1	2	RoNi/7.1	MARV	0.001	36	2016-09-24 07:51:00	2016-09-24 18:47:00	256	10.9333	Ron22_A1	0.00311027
Ron22_A2_TS2	Ron22	A2	2	RoNi/7.1	MARV	0.0001	36	2016-09-24 07:51:00	2016-09-24 18:49:00	142	10.9667	Ron22_A2	0.00172523
Ron22_A3_TS2	Ron22	A3	2	RoNi/7.1	MARV	0.001	36	2016-09-24 07:51:00	2016-09-24 18:52:00	186	11.0167	Ron22_A3	0.0022598
Ron22_B2_TS2	Ron22	B2	2	RoNi/7.1	MARV	0.0001	36	2016-09-24 07:51:00	2016-09-24 18:58:00	144	11.1167	Ron22_B2	0.00174953
Ron22_B1_TS2	Ron22	B1	2	RoNi/7.1	MARV	0.001	36	2016-09-24 07:51:00	2016-09-24 19:00:00	298	11.15	Ron22_B1	0.00362055
Ron22_A1_TS3	Ron22	A1	3	RoNi/7.1	MARV	0.001	36	2016-09-24 07:51:00	2016-09-24 21:42:00	418	13.85	Ron22_A1	0.00507849
Ron22_A2_TS3	Ron22	A2	3	RoNi/7.1	MARV	0.0001	36	2016-09-24 07:51:00	2016-09-24 21:45:00	63	13.9	Ron22_A2	0.000765418
Ron22_A3_TS3	Ron22	A3	3	RoNi/7.1	MARV	0.001	36	2016-09-24 07:51:00	2016-09-24 21:48:00	363	13.95	Ron22_A3	0.00441026
Ron22_B2_TS3	Ron22	B2	3	RoNi/7.1	MARV	0.0001	36	2016-09-24 07:51:00	2016-09-24 21:53:00	22	14.0333	Ron22_B2	0.000267289
Ron22_B1_TS3	Ron22	B1	3	RoNi/7.1	MARV	0.001	36	2016-09-24 07:51:00	2016-09-24 21:54:00	561	14.05	Ron22_B1	0.00681586
Ron22_A1_TS4	Ron22	A1	4	RoNi/7.1	MARV	0.001	36	2016-09-24 07:51:00	2016-09-25 01:05:00	828	17.2333	Ron22_A1	0.0100598
Ron22_A2_TS4	Ron22	A2	4	RoNi/7.1	MARV	0.0001	36	2016-09-24 07:51:00	2016-09-25 01:06:00	78	17.25	Ron22_A2	0.00094766
Ron22_A3_TS4	Ron22	A3	4	RoNi/7.1	MARV	0.001	36	2016-09-24 07:51:00	2016-09-25 01:01:00	735	17.1667	Ron22_A3	0.00892987
Ron22_B2_TS4	Ron22	B2	4	RoNi/7.1	MARV	0.0001	36	2016-09-24 07:51:00	2016-09-25 01:12:00	77	17.35	Ron22_B2	0.000935511
Ron22_B1_TS4	Ron22	B1	4	RoNi/7.1	MARV	0.001	36	2016-09-24 07:51:00	2016-09-25 01:13:00	1008	17.3667	Ron22_B1	0.0122467
Ron22_A1_TS5	Ron22	A1	5	RoNi/7.1	MARV	0.001	36	2016-09-24 07:51:00	2016-09-25 10:19:00	3956	26.4667	Ron22_A1	0.0480634
Ron22_A2_TS5	Ron22	A2	5	RoNi/7.1	MARV	0.0001	36	2016-09-24 07:51:00	2016-09-25 10:20:00	977	26.4833	Ron22_A2	0.01187
Ron22_A3_TS5	Ron22	A3	5	RoNi/7.1	MARV	0.001	36	2016-09-24 07:51:00	2016-09-25 10:21:00	3353	26.5	Ron22_A3	0.0407372
Ron22_B2_TS5	Ron22	B2	5	RoNi/7.1	MARV	0.0001	36	2016-09-24 07:51:00	2016-09-25 10:27:00	1004	26.6	Ron22_B2	0.0121981
Ron22_B1_TS5	Ron22	B1	5	RoNi/7.1	MARV	0.001	36	2016-09-24 07:51:00	2016-09-25 10:26:00	4832	26.5833	Ron22_B1	0.0587063
Ron22_A1_TS6	Ron22	A1	6	RoNi/7.1	MARV	0.001	36	2016-09-24 07:51:00	2016-09-25 19:34:00	13895	35.7167	Ron22_A1	0.168817
Ron22_A2_TS6	Ron22	A2	6	RoNi/7.1	MARV	0.0001	36	2016-09-24 07:51:00	2016-09-25 19:35:00	4937	35.7333	Ron22_A2	0.059982
Ron22_A3_TS6	Ron22	A3	6	RoNi/7.1	MARV	0.001	36	2016-09-24 07:51:00	2016-09-25 19:36:00	12586	35.75	Ron22_A3	0.152913
Ron22_B2_TS6	Ron22	B2	6	RoNi/7.1	MARV	0.0001	36	2016-09-24 07:51:00	2016-09-25 19:40:00	4453	35.8167	Ron22_B2	0.0541017
Ron22_B1_TS6	Ron22	B1	6	RoNi/7.1	MARV	0.001	36	2016-09-24 07:51:00	2016-09-25 19:41:00	14965	35.8333	Ron22_B1	0.181817
Ron22_A1_TS7	Ron22	A1	7	RoNi/7.1	MARV	0.001	36	2016-09-24 07:51:00	2016-09-26 08:15:00	7846	48.4	Ron22_A1	0.0953249
Ron22_A2_TS7	Ron22	A2	7	RoNi/7.1	MARV	0.0001	36	2016-09-24 07:51:00	2016-09-26 08:16:00	13577	48.4167	Ron22_A2	0.164954
Ron22_A3_TS7	Ron22	A3	7	RoNi/7.1	MARV	0.001	36	2016-09-24 07:51:00	2016-09-26 08:17:00	11728	48.4333	Ron22_A3	0.142489
Ron22_B2_TS7	Ron22	B2	7	RoNi/7.1	MARV	0.0001	36	2016-09-24 07:51:00	2016-09-26 08:21:00	9949	48.5	Ron22_B2	0.120875
Ron22_B1_TS7	Ron22	B1	7	RoNi/7.1	MARV	0.001	36	2016-09-24 07:51:00	2016-09-26 08:22:00	9688	48.5167	Ron22_B1	0.117704
Ron23_A1_TS1	Ron23	A1	1	RoNi/7.1	MARV	0.001	36	2016-09-24 07:51:00	2016-09-24 16:22:00	224	8.51667	Ron23_A1	0.00272149
Ron23_A2_TS1	Ron23	A2	1	RoNi/7.1	MARV	0.0001	36	2016-09-24 07:51:00	2016-09-24 16:25:00	18	8.56667	Ron23_A2	0.000218691
Ron23_A3_TS1	Ron23	A3	1	RoNi/7.1	MARV	0.0001	36	2016-09-24 07:51:00	2016-09-24 16:28:00	1	8.61667	Ron23_A3	1.21495e-05
Ron23_B2_TS1	Ron23	B2	1	RoNi/7.1	MARV	0.0001	36	2016-09-24 07:51:00	2016-09-24 16:34:00	0	8.71667	Ron23_B2	0
Ron23_B1_TS1	Ron23	B1	1	RoNi/7.1	MARV	0.001	36	2016-09-24 07:51:00	2016-09-24 16:37:00	188	8.76667	Ron23_B1	0.0022841
Ron23_A1_TS2	Ron23	A1	2	RoNi/7.1	MARV	0.001	36	2016-09-24 07:51:00	2016-09-24 19:17:00	307	11.4333	Ron23_A1	0.00372989
Ron23_A2_TS2	Ron23	A2	2	RoNi/7.1	MARV	0.0001	36	2016-09-24 07:51:00	2016-09-24 19:20:00	48	11.4833	Ron23_A2	0.000583175
Ron23_A3_TS2	Ron23	A3	2	RoNi/7.1	MARV	0.0001	36	2016-09-24 07:51:00	2016-09-24 19:24:00	150	11.55	Ron23_A3	0.00182242
Ron23_B2_TS2	Ron23	B2	2	RoNi/7.1	MARV	0.0001	36	2016-09-24 07:51:00	2016-09-24 19:30:00	4	11.65	Ron23_B2	4.85979e-05
Ron23_B1_TS2	Ron23	B1	2	RoNi/7.1	MARV	0.001	36	2016-09-24 07:51:00	2016-09-24 19:31:00	409	11.6667	Ron23_B1	0.00496914
Ron23_A1_TS3	Ron23	A1	3	RoNi/7.1	MARV	0.001	36	2016-09-24 07:51:00	2016-09-24 22:08:00	483	14.2833	Ron23_A1	0.0058682
Ron23_A2_TS3	Ron23	A2	3	RoNi/7.1	MARV	0.0001	36	2016-09-24 07:51:00	2016-09-24 22:11:00	245	14.3333	Ron23_A2	0.00297662
Ron23_A3_TS3	Ron23	A3	3	RoNi/7.1	MARV	0.0001	36	2016-09-24 07:51:00	2016-09-24 22:15:00	213	14.4	Ron23_A3	0.00258784
Ron23_B2_TS3	Ron23	B2	3	RoNi/7.1	MARV	0.0001	36	2016-09-24 07:51:00	2016-09-24 22:22:00	21	14.5167	Ron23_B2	0.000255139
Ron23_B1_TS3	Ron23	B1	3	RoNi/7.1	MARV	0.001	36	2016-09-24 07:51:00	2016-09-24 22:23:00	631	14.5333	Ron23_B1	0.00766633
Ron23_A1_TS4	Ron23	A1	4	RoNi/7.1	MARV	0.001	36	2016-09-24 07:51:00	2016-09-25 01:26:00	976	17.5833	Ron23_A1	0.0118579
Ron23_A2_TS4	Ron23	A2	4	RoNi/7.1	MARV	0.0001	36	2016-09-24 07:51:00	2016-09-25 01:27:00	274	17.6	Ron23_A2	0.00332896
Ron23_A3_TS4	Ron23	A3	4	RoNi/7.1	MARV	0.0001	36	2016-09-24 07:51:00	2016-09-25 01:29:00	73	17.6333	Ron23_A3	0.000886913
Ron23_B2_TS4	Ron23	B2	4	RoNi/7.1	MARV	0.0001	36	2016-09-24 07:51:00	2016-09-25 01:37:00	36	17.7667	Ron23_B2	0.000437382
Ron23_B1_TS4	Ron23	B1	4	RoNi/7.1	MARV	0.001	36	2016-09-24 07:51:00	2016-09-25 01:37:00	1224	17.7667	Ron23_B1	0.014871
Ron23_A1_TS5	Ron23	A1	5	RoNi/7.1	MARV	0.001	36	2016-09-24 07:51:00	2016-09-25 10:38:00	5131	26.7833	Ron23_A1	0.062339
Ron23_A2_TS5	Ron23	A2	5	RoNi/7.1	MARV	0.0001	36	2016-09-24 07:51:00	2016-09-25 10:39:00	1036	26.8	Ron23_A2	0.0125869
Ron23_A3_TS5	Ron23	A3	5	RoNi/7.1	MARV	0.0001	36	2016-09-24 07:51:00	2016-09-25 10:40:00	740	26.8167	Ron23_A3	0.00899062
Ron23_B2_TS5	Ron23	B2	5	RoNi/7.1	MARV	0.0001	36	2016-09-24 07:51:00	2016-09-25 10:44:00	748	26.8833	Ron23_B2	0.00908782
Ron23_B1_TS5	Ron23	B1	5	RoNi/7.1	MARV	0.001	36	2016-09-24 07:51:00	2016-09-25 10:45:00	5934	26.9	Ron23_B1	0.0720951
Ron23_A1_TS6	Ron23	A1	6	RoNi/7.1	MARV	0.001	36	2016-09-24 07:51:00	2016-09-25 19:22:00	14585	35.5167	Ron23_A1	0.1772
Ron23_A2_TS6	Ron23	A2	6	RoNi/7.1	MARV	0.0001	36	2016-09-24 07:51:00	2016-09-25 19:24:00	3829	35.55	Ron23_A2	0.0465204
Ron23_A3_TS6	Ron23	A3	6	RoNi/7.1	MARV	0.0001	36	2016-09-24 07:51:00	2016-09-25 19:25:00	2890	35.5667	Ron23_A3	0.035112
Ron23_B2_TS6	Ron23	B2	6	RoNi/7.1	MARV	0.0001	36	2016-09-24 07:51:00	2016-09-25 19:29:00	3346	35.6333	Ron23_B2	0.0406522
Ron23_B1_TS6	Ron23	B1	6	RoNi/7.1	MARV	0.001	36	2016-09-24 07:51:00	2016-09-25 19:30:00	14698	35.65	Ron23_B1	0.178573
Ron24_A1_TS1	Ron24	A1	1	RoNi/7.1	MARV	0.001	36	2016-09-24 07:51:00	2016-09-24 17:01:00	365	9.16667	Ron24_A1	0.00443456
Ron24_A2_TS1	Ron24	A2	1	RoNi/7.1	MARV	0.0001	36	2016-09-24 07:51:00	2016-09-24 17:04:00	169	9.21667	Ron24_A2	0.00205326
Ron24_A3_TS1	Ron24	A3	1	RoNi/7.1	MARV	0.0001	36	2016-09-24 07:51:00	2016-09-24 17:06:00	172	9.25	Ron24_A3	0.00208971
Ron24_B2_TS1	Ron24	B2	1	RoNi/7.1	MARV	0.0001	36	2016-09-24 07:51:00	2016-09-24 17:13:00	138	9.36667	Ron24_B2	0.00167663
Ron24_B1_TS1	Ron24	B1	1	RoNi/7.1	MARV	0.001	36	2016-09-24 07:51:00	2016-09-24 17:14:00	275	9.38333	Ron24_B1	0.00334111
Ron24_A1_TS2	Ron24	A1	2	RoNi/7.1	MARV	0.001	36	2016-09-24 07:51:00	2016-09-24 19:45:00	230	11.9	Ron24_A1	0.00279438
Ron24_A2_TS2	Ron24	A2	2	RoNi/7.1	MARV	0.0001	36	2016-09-24 07:51:00	2016-09-24 19:49:00	181	11.9667	Ron24_A2	0.00219906
Ron24_A3_TS2	Ron24	A3	2	RoNi/7.1	MARV	0.0001	36	2016-09-24 07:51:00	2016-09-24 19:52:00	53	12.0167	Ron24_A3	0.000643923
Ron24_B2_TS2	Ron24	B2	2	RoNi/7.1	MARV	0.0001	36	2016-09-24 07:51:00	2016-09-24 19:59:00	183	12.1333	Ron24_B2	0.00222336
Ron24_B1_TS2	Ron24	B1	2	RoNi/7.1	MARV	0.001	36	2016-09-24 07:51:00	2016-09-24 20:00:00	221	12.15	Ron24_B1	0.00268504
Ron24_A1_TS3	Ron24	A1	3	RoNi/7.1	MARV	0.001	36	2016-09-24 07:51:00	2016-09-24 22:39:00	474	14.8	Ron24_A1	0.00575886
Ron24_A2_TS3	Ron24	A2	3	RoNi/7.1	MARV	0.0001	36	2016-09-24 07:51:00	2016-09-24 22:42:00	196	14.85	Ron24_A2	0.0023813
Ron24_A3_TS3	Ron24	A3	3	RoNi/7.1	MARV	0.0001	36	2016-09-24 07:51:00	2016-09-24 22:45:00	154	14.9	Ron24_A3	0.00187102
Ron24_B2_TS3	Ron24	B2	3	RoNi/7.1	MARV	0.0001	36	2016-09-24 07:51:00	2016-09-24 22:52:00	195	15.0167	Ron24_B2	0.00236915
Ron24_B1_TS3	Ron24	B1	3	RoNi/7.1	MARV	0.001	36	2016-09-24 07:51:00	2016-09-24 22:53:00	499	15.0333	Ron24_B1	0.00606259
Ron24_A1_TS4	Ron24	A1	4	RoNi/7.1	MARV	0.001	36	2016-09-24 07:51:00	2016-09-25 01:51:00	997	18	Ron24_A1	0.012113
Ron24_A2_TS4	Ron24	A2	4	RoNi/7.1	MARV	0.0001	36	2016-09-24 07:51:00	2016-09-25 01:52:00	223	18.0167	Ron24_A2	0.00270934
Ron24_A3_TS4	Ron24	A3	4	RoNi/7.1	MARV	0.0001	36	2016-09-24 07:51:00	2016-09-25 01:53:00	184	18.0333	Ron24_A3	0.00223551
Ron24_B2_TS4	Ron24	B2	4	RoNi/7.1	MARV	0.0001	36	2016-09-24 07:51:00	2016-09-25 01:58:00	115	18.1167	Ron24_B2	0.00139719
Ron24_B1_TS4	Ron24	B1	4	RoNi/7.1	MARV	0.001	36	2016-09-24 07:51:00	2016-09-25 01:59:00	965	18.1333	Ron24_B1	0.0117243
Ron24_A1_TS5	Ron24	A1	5	RoNi/7.1	MARV	0.001	36	2016-09-24 07:51:00	2016-09-25 10:58:00	3317	27.1167	Ron24_A1	0.0402998
Ron24_A2_TS5	Ron24	A2	5	RoNi/7.1	MARV	0.0001	36	2016-09-24 07:51:00	2016-09-25 10:59:00	1395	27.1333	Ron24_A2	0.0169485
Ron24_A3_TS5	Ron24	A3	5	RoNi/7.1	MARV	0.0001	36	2016-09-24 07:51:00	2016-09-25 11:00:00	787	27.15	Ron24_A3	0.00956165
Ron24_B2_TS5	Ron24	B2	5	RoNi/7.1	MARV	0.0001	36	2016-09-24 07:51:00	2016-09-25 11:05:00	1223	27.2333	Ron24_B2	0.0148588
Ron24_B1_TS5	Ron24	B1	5	RoNi/7.1	MARV	0.001	36	2016-09-24 07:51:00	2016-09-25 11:06:00	4460	27.25	Ron24_B1	0.0541867
Ron24_A1_TS6	Ron24	A1	6	RoNi/7.1	MARV	0.001	36	2016-09-24 07:51:00	2016-09-25 20:03:00	11927	36.2	Ron24_A1	0.144907
Ron24_A2_TS6	Ron24	A2	6	RoNi/7.1	MARV	0.0001	36	2016-09-24 07:51:00	2016-09-25 20:04:00	6326	36.2167	Ron24_A2	0.0768577
Ron24_A3_TS6	Ron24	A3	6	RoNi/7.1	MARV	0.0001	36	2016-09-24 07:51:00	2016-09-25 20:04:00	3413	36.2167	Ron24_A3	0.0414662
Ron24_B2_TS6	Ron24	B2	6	RoNi/7.1	MARV	0.0001	36	2016-09-24 07:51:00	2016-09-25 20:09:00	5449	36.3	Ron24_B2	0.0662026
Ron24_B1_TS6	Ron24	B1	6	RoNi/7.1	MARV	0.001	36	2016-09-24 07:51:00	2016-09-25 20:10:00	14237	36.3167	Ron24_B1	0.172972
Ron24_A1_TS7	Ron24	A1	7	RoNi/7.1	MARV	0.001	36	2016-09-24 07:51:00	2016-09-26 08:40:00	12566	48.8167	Ron24_A1	0.15267
Ron24_A2_TS7	Ron24	A2	7	RoNi/7.1	MARV	0.0001	36	2016-09-24 07:51:00	2016-09-26 08:42:00	12672	48.85	Ron24_A2	0.153958
Ron24_A3_TS7	Ron24	A3	7	RoNi/7.1	MARV	0.0001	36	2016-09-24 07:51:00	2016-09-26 08:43:00	8598	48.8667	Ron24_A3	0.104461
Ron24_B2_TS7	Ron24	B2	7	RoNi/7.1	MARV	0.0001	36	2016-09-24 07:51:00	2016-09-26 08:48:00	15787	48.95	Ron24_B2	0.191804
Ron24_B1_TS7	Ron24	B1	7	RoNi/7.1	MARV	0.001	36	2016-09-24 07:51:00	2016-09-26 08:49:00	11309	48.9667	Ron24_B1	0.137399
Ron24_A1_TS8	Ron24	A1	8	RoNi/7.1	MARV	0.001	36	2016-09-24 07:51:00	2016-09-27 08:01:00	1354	72.1667	Ron24_A1	0.0164504
Ron24_A2_TS8	Ron24	A2	8	RoNi/7.1	MARV	0.0001	36	2016-09-24 07:51:00	2016-09-27 08:02:00	750	72.1833	Ron24_A2	0.00911212
Ron24_A3_TS8	Ron24	A3	8	RoNi/7.1	MARV	0.0001	36	2016-09-24 07:51:00	2016-09-27 08:04:00	2087	72.2167	Ron24_A3	0.025356
Ron24_B2_TS8	Ron24	B2	8	RoNi/7.1	MARV	0.0001	36	2016-09-24 07:51:00	2016-09-27 08:08:00	900	72.2833	Ron24_B2	0.0109345
Ron24_B1_TS8	Ron24	B1	8	RoNi/7.1	MARV	0.001	36	2016-09-24 07:51:00	2016-09-27 08:09:00	999	72.3	Ron24_B1	0.0121373
Ron3_A1_TS1	Ron3	A1	1	RoNi/7.1	EBOV	0.001	36	2016-09-06 05:21:00	2016-09-06 12:46:00	1	7.41667	Ron3_A1	1.21495e-05
Ron3_A2_TS1	Ron3	A2	1	RoNi/7.1	EBOV	0.0001	36	2016-09-06 05:21:00	2016-09-06 12:49:00	0	7.46667	Ron3_A2	0
Ron3_A3_TS1	Ron3	A3	1	RoNi/7.1	EBOV	0.0001	36	2016-09-06 05:21:00	2016-09-06 13:03:00	0	7.7	Ron3_A3	0
Ron3_B2_TS1	Ron3	B2	1	RoNi/7.1	EBOV	0.0001	36	2016-09-06 05:21:00	2016-09-06 13:26:00	0	8.08333	Ron3_B2	0
Ron3_B1_TS1	Ron3	B1	1	RoNi/7.1	EBOV	0.001	36	2016-09-06 05:21:00	2016-09-06 13:29:00	18	8.13333	Ron3_B1	0.000218691
Ron3_A1_TS2	Ron3	A1	2	RoNi/7.1	EBOV	0.001	36	2016-09-06 05:21:00	2016-09-06 17:04:00	187	11.7167	Ron3_A1	0.00227195
Ron3_A2_TS2	Ron3	A2	2	RoNi/7.1	EBOV	0.0001	36	2016-09-06 05:21:00	2016-09-06 17:06:00	100	11.75	Ron3_A2	0.00121495
Ron3_A3_TS2	Ron3	A3	2	RoNi/7.1	EBOV	0.0001	36	2016-09-06 05:21:00	2016-09-06 17:09:00	31	11.8	Ron3_A3	0.000376634
Ron3_B2_TS2	Ron3	B2	2	RoNi/7.1	EBOV	0.0001	36	2016-09-06 05:21:00	2016-09-06 17:16:00	0	11.9167	Ron3_B2	0
Ron3_B1_TS2	Ron3	B1	2	RoNi/7.1	EBOV	0.001	36	2016-09-06 05:21:00	2016-09-06 17:17:00	224	11.9333	Ron3_B1	0.00272149
Ron3_A1_TS3	Ron3	A1	3	RoNi/7.1	EBOV	0.001	36	2016-09-06 05:21:00	2016-09-06 21:28:00	360	16.1167	Ron3_A1	0.00437382
Ron3_A2_TS3	Ron3	A2	3	RoNi/7.1	EBOV	0.0001	36	2016-09-06 05:21:00	2016-09-06 21:31:00	311	16.1667	Ron3_A2	0.00377849
Ron3_A3_TS3	Ron3	A3	3	RoNi/7.1	EBOV	0.0001	36	2016-09-06 05:21:00	2016-09-06 21:35:00	174	16.2333	Ron3_A3	0.00211401
Ron3_B2_TS3	Ron3	B2	3	RoNi/7.1	EBOV	0.0001	36	2016-09-06 05:21:00	2016-09-06 21:42:00	27	16.35	Ron3_B2	0.000328036
Ron3_B1_TS3	Ron3	B1	3	RoNi/7.1	EBOV	0.001	36	2016-09-06 05:21:00	2016-09-06 21:43:00	442	16.3667	Ron3_B1	0.00537007
Ron3_A1_TS4	Ron3	A1	4	RoNi/7.1	EBOV	0.001	36	2016-09-06 05:21:00	2016-09-07 07:32:00	1040	26.1833	Ron3_A1	0.0126355
Ron3_A2_TS4	Ron3	A2	4	RoNi/7.1	EBOV	0.0001	36	2016-09-06 05:21:00	2016-09-07 07:35:00	23	26.2333	Ron3_A2	0.000279438
Ron3_A3_TS4	Ron3	A3	4	RoNi/7.1	EBOV	0.0001	36	2016-09-06 05:21:00	2016-09-07 07:38:00	200	26.2833	Ron3_A3	0.0024299
Ron3_B2_TS4	Ron3	B2	4	RoNi/7.1	EBOV	0.0001	36	2016-09-06 05:21:00	2016-09-07 07:44:00	82	26.3833	Ron3_B2	0.000996258
Ron3_B1_TS4	Ron3	B1	4	RoNi/7.1	EBOV	0.001	36	2016-09-06 05:21:00	2016-09-07 07:44:00	1198	26.3833	Ron3_B1	0.0145551
Ron3_A1_TS5	Ron3	A1	5	RoNi/7.1	EBOV	0.001	36	2016-09-06 05:21:00	2016-09-07 17:32:00	3215	36.1833	Ron3_A1	0.0390606
Ron3_A2_TS5	Ron3	A2	5	RoNi/7.1	EBOV	0.0001	36	2016-09-06 05:21:00	2016-09-07 17:34:00	310	36.2167	Ron3_A2	0.00376634
Ron3_A3_TS5	Ron3	A3	5	RoNi/7.1	EBOV	0.0001	36	2016-09-06 05:21:00	2016-09-07 17:35:00	722	36.2333	Ron3_A3	0.00877193
Ron3_B2_TS5	Ron3	B2	5	RoNi/7.1	EBOV	0.0001	36	2016-09-06 05:21:00	2016-09-07 17:39:00	503	36.3	Ron3_B2	0.00611119
Ron3_B1_TS5	Ron3	B1	5	RoNi/7.1	EBOV	0.001	36	2016-09-06 05:21:00	2016-09-07 17:40:00	3794	36.3167	Ron3_B1	0.0460952
Ron4_A1_TS1	Ron4	A1	1	RoNi/7.1	EBOV	0.001	36	2016-09-06 05:21:00	2016-09-06 13:46:00	73	8.41667	Ron4_A1	0.000886913
Ron4_A2_TS1	Ron4	A2	1	RoNi/7.1	EBOV	0.0001	36	2016-09-06 05:21:00	2016-09-06 13:48:00	18	8.45	Ron4_A2	0.000218691
Ron4_A3_TS1	Ron4	A3	1	RoNi/7.1	EBOV	0.0001	36	2016-09-06 05:21:00	2016-09-06 13:51:00	76	8.5	Ron4_A3	0.000923361
Ron4_B2_TS1	Ron4	B2	1	RoNi/7.1	EBOV	0.0001	36	2016-09-06 05:21:00	2016-09-06 13:40:00	156	8.31667	Ron4_B2	0.00189532
Ron4_B1_TS1	Ron4	B1	1	RoNi/7.1	EBOV	0.001	36	2016-09-06 05:21:00	2016-09-06 13:41:00	135	8.33333	Ron4_B1	0.00164018
Ron4_A1_TS2	Ron4	A1	2	RoNi/7.1	EBOV	0.001	36	2016-09-06 05:21:00	2016-09-06 17:57:00	254	12.6	Ron4_A1	0.00308597
Ron4_A2_TS2	Ron4	A2	2	RoNi/7.1	EBOV	0.0001	36	2016-09-06 05:21:00	2016-09-06 18:01:00	37	12.6667	Ron4_A2	0.000449531
Ron4_A3_TS2	Ron4	A3	2	RoNi/7.1	EBOV	0.0001	36	2016-09-06 05:21:00	2016-09-06 18:03:00	23	12.7	Ron4_A3	0.000279438
Ron4_B2_TS2	Ron4	B2	2	RoNi/7.1	EBOV	0.0001	36	2016-09-06 05:21:00	2016-09-06 18:08:00	88	12.7833	Ron4_B2	0.00106915
Ron4_B1_TS2	Ron4	B1	2	RoNi/7.1	EBOV	0.001	36	2016-09-06 05:21:00	2016-09-06 18:11:00	325	12.8333	Ron4_B1	0.00394858
Ron4_A1_TS3	Ron4	A1	3	RoNi/7.1	EBOV	0.001	36	2016-09-06 05:21:00	2016-09-06 22:14:00	438	16.8833	Ron4_A1	0.00532148
Ron4_A2_TS3	Ron4	A2	3	RoNi/7.1	EBOV	0.0001	36	2016-09-06 05:21:00	2016-09-06 22:16:00	40	16.9167	Ron4_A2	0.000485979
Ron4_A3_TS3	Ron4	A3	3	RoNi/7.1	EBOV	0.0001	36	2016-09-06 05:21:00	2016-09-06 22:19:00	104	16.9667	Ron4_A3	0.00126355
Ron4_B2_TS3	Ron4	B2	3	RoNi/7.1	EBOV	0.0001	36	2016-09-06 05:21:00	2016-09-06 22:23:00	365	17.0333	Ron4_B2	0.00443456
Ron4_B1_TS3	Ron4	B1	3	RoNi/7.1	EBOV	0.001	36	2016-09-06 05:21:00	2016-09-06 22:24:00	545	17.05	Ron4_B1	0.00662147
Ron4_A1_TS4	Ron4	A1	4	RoNi/7.1	EBOV	0.001	36	2016-09-06 05:21:00	2016-09-07 08:07:00	1095	26.7667	Ron4_A1	0.0133037
Ron4_A2_TS4	Ron4	A2	4	RoNi/7.1	EBOV	0.0001	36	2016-09-06 05:21:00	2016-09-07 08:10:00	145	26.8167	Ron4_A2	0.00176168
Ron4_A3_TS4	Ron4	A3	4	RoNi/7.1	EBOV	0.0001	36	2016-09-06 05:21:00	2016-09-07 08:12:00	361	26.85	Ron4_A3	0.00438596
Ron4_B2_TS4	Ron4	B2	4	RoNi/7.1	EBOV	0.0001	36	2016-09-06 05:21:00	2016-09-07 08:17:00	306	26.9333	Ron4_B2	0.00371774
Ron4_B1_TS4	Ron4	B1	4	RoNi/7.1	EBOV	0.001	36	2016-09-06 05:21:00	2016-09-07 08:17:00	1265	26.9333	Ron4_B1	0.0153691
Ron4_A1_TS5	Ron4	A1	5	RoNi/7.1	EBOV	0.001	36	2016-09-06 05:21:00	2016-09-07 18:23:00	3072	37.0333	Ron4_A1	0.0373232
Ron4_A2_TS5	Ron4	A2	5	RoNi/7.1	EBOV	0.0001	36	2016-09-06 05:21:00	2016-09-07 18:24:00	555	37.05	Ron4_A2	0.00674297
Ron4_A3_TS5	Ron4	A3	5	RoNi/7.1	EBOV	0.0001	36	2016-09-06 05:21:00	2016-09-07 18:25:00	968	37.0667	Ron4_A3	0.0117607
Ron4_B2_TS5	Ron4	B2	5	RoNi/7.1	EBOV	0.0001	36	2016-09-06 05:21:00	2016-09-07 18:30:00	1150	37.15	Ron4_B2	0.0139719
Ron4_B1_TS5	Ron4	B1	5	RoNi/7.1	EBOV	0.001	36	2016-09-06 05:21:00	2016-09-07 18:32:00	3607	37.1833	Ron4_B1	0.0438232
Ron4_A1_TS6	Ron4	A1	6	RoNi/7.1	EBOV	0.001	36	2016-09-06 05:21:00	2016-09-08 09:20:00	7199	51.9833	Ron4_A1	0.0874642
Ron4_A2_TS6	Ron4	A2	6	RoNi/7.1	EBOV	0.0001	36	2016-09-06 05:21:00	2016-09-08 09:21:00	1973	52	Ron4_A2	0.0239709
Ron4_A3_TS6	Ron4	A3	6	RoNi/7.1	EBOV	0.0001	36	2016-09-06 05:21:00	2016-09-08 09:22:00	3105	52.0167	Ron4_A3	0.0377242
Ron4_B2_TS6	Ron4	B2	6	RoNi/7.1	EBOV	0.0001	36	2016-09-06 05:21:00	2016-09-08 09:25:00	3832	52.0667	Ron4_B2	0.0465568
Ron4_B1_TS6	Ron4	B1	6	RoNi/7.1	EBOV	0.001	36	2016-09-06 05:21:00	2016-09-08 09:27:00	9351	52.1	Ron4_B1	0.11361
Ron5_A1_TS1	Ron5	A1	1	RoNi/7.1	VSVG	0.001	36	2016-09-06 04:59:00	2016-09-06 13:56:00	370	8.95	Ron5_A1	0.00449531
Ron5_A2_TS1	Ron5	A2	1	RoNi/7.1	VSVG	0.0001	36	2016-09-06 04:59:00	2016-09-06 13:59:00	215	9	Ron5_A2	0.00261214
Ron5_A3_TS1	Ron5	A3	1	RoNi/7.1	VSVG	0.001	36	2016-09-06 04:59:00	2016-09-06 14:01:00	417	9.03333	Ron5_A3	0.00506634
Ron5_B2_TS1	Ron5	B2	1	RoNi/7.1	VSVG	0.0001	36	2016-09-06 04:59:00	2016-09-06 14:08:00	2	9.15	Ron5_B2	2.4299e-05
Ron5_B1_TS1	Ron5	B1	1	RoNi/7.1	VSVG	0.001	36	2016-09-06 04:59:00	2016-09-06 14:11:00	161	9.2	Ron5_B1	0.00195607
Ron5_A1_TS2	Ron5	A1	2	RoNi/7.1	VSVG	0.001	36	2016-09-06 04:59:00	2016-09-06 16:10:00	934	11.1833	Ron5_A1	0.0113476
Ron5_A2_TS2	Ron5	A2	2	RoNi/7.1	VSVG	0.0001	36	2016-09-06 04:59:00	2016-09-06 16:14:00	44	11.25	Ron5_A2	0.000534577
Ron5_A3_TS2	Ron5	A3	2	RoNi/7.1	VSVG	0.001	36	2016-09-06 04:59:00	2016-09-06 16:15:00	1090	11.2667	Ron5_A3	0.0132429
Ron5_B2_TS2	Ron5	B2	2	RoNi/7.1	VSVG	0.0001	36	2016-09-06 04:59:00	2016-09-06 16:21:00	180	11.3667	Ron5_B2	0.00218691
Ron5_B1_TS2	Ron5	B1	2	RoNi/7.1	VSVG	0.001	36	2016-09-06 04:59:00	2016-09-06 16:21:00	716	11.3667	Ron5_B1	0.00869903
Ron5_A1_TS3	Ron5	A1	3	RoNi/7.1	VSVG	0.001	36	2016-09-06 04:59:00	2016-09-06 20:55:00	3109	15.9333	Ron5_A1	0.0377728
Ron5_A2_TS3	Ron5	A2	3	RoNi/7.1	VSVG	0.0001	36	2016-09-06 04:59:00	2016-09-06 20:56:00	849	15.95	Ron5_A2	0.0103149
Ron5_A3_TS3	Ron5	A3	3	RoNi/7.1	VSVG	0.001	36	2016-09-06 04:59:00	2016-09-06 20:57:00	3148	15.9667	Ron5_A3	0.0382466
Ron5_B2_TS3	Ron5	B2	3	RoNi/7.1	VSVG	0.0001	36	2016-09-06 04:59:00	2016-09-06 21:02:00	875	16.05	Ron5_B2	0.0106308
Ron5_B1_TS3	Ron5	B1	3	RoNi/7.1	VSVG	0.001	36	2016-09-06 04:59:00	2016-09-06 21:03:00	2504	16.0667	Ron5_B1	0.0304223
Ron5_A1_TS4	Ron5	A1	4	RoNi/7.1	VSVG	0.001	36	2016-09-06 04:59:00	2016-09-07 06:59:00	14856	26	Ron5_A1	0.180493
Ron5_A2_TS4	Ron5	A2	4	RoNi/7.1	VSVG	0.0001	36	2016-09-06 04:59:00	2016-09-07 07:00:00	8400	26.0167	Ron5_A2	0.102056
Ron5_A3_TS4	Ron5	A3	4	RoNi/7.1	VSVG	0.001	36	2016-09-06 04:59:00	2016-09-07 07:02:00	15799	26.05	Ron5_A3	0.19195
Ron5_B2_TS4	Ron5	B2	4	RoNi/7.1	VSVG	0.0001	36	2016-09-06 04:59:00	2016-09-07 07:07:00	7818	26.1333	Ron5_B2	0.0949847
Ron5_B1_TS4	Ron5	B1	4	RoNi/7.1	VSVG	0.001	36	2016-09-06 04:59:00	2016-09-07 07:08:00	12800	26.15	Ron5_B1	0.155513
Ron6_A1_TS1	Ron6	A1	1	RoNi/7.1	VSVG	0.001	36	2016-09-06 04:59:00	2016-09-06 14:16:00	386	9.28333	Ron6_A1	0.0046897
Ron6_A2_TS1	Ron6	A2	1	RoNi/7.1	VSVG	0.0001	36	2016-09-06 04:59:00	2016-09-06 14:18:00	182	9.31667	Ron6_A2	0.00221121
Ron6_A3_TS1	Ron6	A3	1	RoNi/7.1	VSVG	0.001	36	2016-09-06 04:59:00	2016-09-06 14:21:00	450	9.36667	Ron6_A3	0.00546727
Ron6_B2_TS1	Ron6	B2	1	RoNi/7.1	VSVG	0.0001	36	2016-09-06 04:59:00	2016-09-06 14:28:00	15	9.48333	Ron6_B2	0.000182242
Ron6_B1_TS1	Ron6	B1	1	RoNi/7.1	VSVG	0.001	36	2016-09-06 04:59:00	2016-09-06 14:30:00	495	9.51667	Ron6_B1	0.006014
Ron6_A1_TS2	Ron6	A1	2	RoNi/7.1	VSVG	0.001	36	2016-09-06 04:59:00	2016-09-06 16:44:00	885	11.75	Ron6_A1	0.0107523
Ron6_A2_TS2	Ron6	A2	2	RoNi/7.1	VSVG	0.0001	36	2016-09-06 04:59:00	2016-09-06 16:48:00	67	11.8167	Ron6_A2	0.000814016
Ron6_A3_TS2	Ron6	A3	2	RoNi/7.1	VSVG	0.001	36	2016-09-06 04:59:00	2016-09-06 16:50:00	1142	11.85	Ron6_A3	0.0138747
Ron6_B2_TS2	Ron6	B2	2	RoNi/7.1	VSVG	0.0001	36	2016-09-06 04:59:00	2016-09-06 16:54:00	165	11.9167	Ron6_B2	0.00200467
Ron6_B1_TS2	Ron6	B1	2	RoNi/7.1	VSVG	0.001	36	2016-09-06 04:59:00	2016-09-06 16:56:00	1019	11.95	Ron6_B1	0.0123803
Ron6_A1_TS3	Ron6	A1	3	RoNi/7.1	VSVG	0.001	36	2016-09-06 04:59:00	2016-09-06 21:18:00	2960	16.3167	Ron6_A1	0.0359625
Ron6_A2_TS3	Ron6	A2	3	RoNi/7.1	VSVG	0.0001	36	2016-09-06 04:59:00	2016-09-06 21:19:00	745	16.3333	Ron6_A2	0.00905137
Ron6_A3_TS3	Ron6	A3	3	RoNi/7.1	VSVG	0.001	36	2016-09-06 04:59:00	2016-09-06 21:20:00	3212	16.35	Ron6_A3	0.0390242
Ron6_B2_TS3	Ron6	B2	3	RoNi/7.1	VSVG	0.0001	36	2016-09-06 04:59:00	2016-09-06 21:25:00	539	16.4333	Ron6_B2	0.00654857
Ron6_B1_TS3	Ron6	B1	3	RoNi/7.1	VSVG	0.001	36	2016-09-06 04:59:00	2016-09-06 21:25:00	3010	16.4333	Ron6_B1	0.03657
Ron6_A1_TS4	Ron6	A1	4	RoNi/7.1	VSVG	0.001	36	2016-09-06 04:59:00	2016-09-07 07:19:00	13897	26.3333	Ron6_A1	0.168841
Ron6_A2_TS4	Ron6	A2	4	RoNi/7.1	VSVG	0.0001	36	2016-09-06 04:59:00	2016-09-07 07:21:00	6302	26.3667	Ron6_A2	0.0765661
Ron6_A3_TS4	Ron6	A3	4	RoNi/7.1	VSVG	0.001	36	2016-09-06 04:59:00	2016-09-07 07:22:00	13936	26.3833	Ron6_A3	0.169315
Ron6_B2_TS4	Ron6	B2	4	RoNi/7.1	VSVG	0.0001	36	2016-09-06 04:59:00	2016-09-07 07:26:00	6082	26.45	Ron6_B2	0.0738932
Ron6_B1_TS4	Ron6	B1	4	RoNi/7.1	VSVG	0.001	36	2016-09-06 04:59:00	2016-09-07 07:27:00	11838	26.4667	Ron6_B1	0.143826
Ron6_A1_TS5	Ron6	A1	5	RoNi/7.1	VSVG	0.001	36	2016-09-06 04:59:00	2016-09-07 18:02:00	9609	37.05	Ron6_A1	0.116744
Ron6_A2_TS5	Ron6	A2	5	RoNi/7.1	VSVG	0.0001	36	2016-09-06 04:59:00	2016-09-07 18:03:00	12486	37.0667	Ron6_A2	0.151698
Ron6_A3_TS5	Ron6	A3	5	RoNi/7.1	VSVG	0.001	36	2016-09-06 04:59:00	2016-09-07 18:04:00	12382	37.0833	Ron6_A3	0.150435
Ron6_B2_TS5	Ron6	B2	5	RoNi/7.1	VSVG	0.0001	36	2016-09-06 04:59:00	2016-09-07 18:08:00	12054	37.15	Ron6_B2	0.14645
Ron6_B1_TS5	Ron6	B1	5	RoNi/7.1	VSVG	0.001	36	2016-09-06 04:59:00	2016-09-07 18:10:00	11016	37.1833	Ron6_B1	0.133839
Ron6_A1_TS6	Ron6	A1	6	RoNi/7.1	VSVG	0.001	36	2016-09-06 04:59:00	2016-09-08 07:36:00	1338	50.6167	Ron6_A1	0.016256
Ron6_A2_TS6	Ron6	A2	6	RoNi/7.1	VSVG	0.0001	36	2016-09-06 04:59:00	2016-09-08 07:38:00	5294	50.65	Ron6_A2	0.0643194
Ron6_A3_TS6	Ron6	A3	6	RoNi/7.1	VSVG	0.001	36	2016-09-06 04:59:00	2016-09-08 07:40:00	1430	50.6833	Ron6_A3	0.0173738
Ron6_B2_TS6	Ron6	B2	6	RoNi/7.1	VSVG	0.0001	36	2016-09-06 04:59:00	2016-09-08 07:45:00	6294	50.7667	Ron6_B2	0.0764689
Ron6_B1_TS6	Ron6	B1	6	RoNi/7.1	VSVG	0.001	36	2016-09-06 04:59:00	2016-09-08 07:46:00	1916	50.7833	Ron6_B1	0.0232784
Ron7_A1_TS1	Ron7	A1	1	RoNi/7.1	VSVG	0.001	36	2016-09-06 04:59:00	2016-09-06 14:34:00	417	9.58333	Ron7_A1	0.00506634
Ron7_A2_TS1	Ron7	A2	1	RoNi/7.1	VSVG	0.0001	36	2016-09-06 04:59:00	2016-09-06 14:36:00	56	9.61667	Ron7_A2	0.000680371
Ron7_A3_TS1	Ron7	A3	1	RoNi/7.1	VSVG	0.0001	36	2016-09-06 04:59:00	2016-09-06 14:39:00	13	9.66667	Ron7_A3	0.000157943
Ron7_B2_TS1	Ron7	B2	1	RoNi/7.1	VSVG	0.0001	36	2016-09-06 04:59:00	2016-09-06 14:47:00	7	9.8	Ron7_B2	8.50464e-05
Ron7_B1_TS1	Ron7	B1	1	RoNi/7.1	VSVG	0.001	36	2016-09-06 04:59:00	2016-09-06 14:49:00	418	9.83333	Ron7_B1	0.00507849
Ron7_A1_TS2	Ron7	A1	2	RoNi/7.1	VSVG	0.001	36	2016-09-06 04:59:00	2016-09-06 17:19:00	940	12.3333	Ron7_A1	0.0114205
Ron7_A2_TS2	Ron7	A2	2	RoNi/7.1	VSVG	0.0001	36	2016-09-06 04:59:00	2016-09-06 17:23:00	159	12.4	Ron7_A2	0.00193177
Ron7_A3_TS2	Ron7	A3	2	RoNi/7.1	VSVG	0.0001	36	2016-09-06 04:59:00	2016-09-06 17:26:00	159	12.45	Ron7_A3	0.00193177
Ron7_B2_TS2	Ron7	B2	2	RoNi/7.1	VSVG	0.0001	36	2016-09-06 04:59:00	2016-09-06 17:31:00	272	12.5333	Ron7_B2	0.00330466
Ron7_B1_TS2	Ron7	B1	2	RoNi/7.1	VSVG	0.001	36	2016-09-06 04:59:00	2016-09-06 17:33:00	1184	12.5667	Ron7_B1	0.014385
Ron7_A1_TS3	Ron7	A1	3	RoNi/7.1	VSVG	0.001	36	2016-09-06 04:59:00	2016-09-06 21:46:00	2806	16.7833	Ron7_A1	0.0340915
Ron7_A2_TS3	Ron7	A2	3	RoNi/7.1	VSVG	0.0001	36	2016-09-06 04:59:00	2016-09-06 21:48:00	917	16.8167	Ron7_A2	0.0111411
Ron7_A3_TS3	Ron7	A3	3	RoNi/7.1	VSVG	0.0001	36	2016-09-06 04:59:00	2016-09-06 21:50:00	729	16.85	Ron7_A3	0.00885698
Ron7_B2_TS3	Ron7	B2	3	RoNi/7.1	VSVG	0.0001	36	2016-09-06 04:59:00	2016-09-06 21:52:00	879	16.8833	Ron7_B2	0.0106794
Ron7_B1_TS3	Ron7	B1	3	RoNi/7.1	VSVG	0.001	36	2016-09-06 04:59:00	2016-09-06 21:53:00	3877	16.9	Ron7_B1	0.0471036
Ron7_A1_TS4	Ron7	A1	4	RoNi/7.1	VSVG	0.001	36	2016-09-06 04:59:00	2016-09-07 07:47:00	14230	26.8	Ron7_A1	0.172887
Ron7_A2_TS4	Ron7	A2	4	RoNi/7.1	VSVG	0.0001	36	2016-09-06 04:59:00	2016-09-07 07:48:00	7459	26.8167	Ron7_A2	0.090623
Ron7_A3_TS4	Ron7	A3	4	RoNi/7.1	VSVG	0.0001	36	2016-09-06 04:59:00	2016-09-07 07:49:00	4281	26.8333	Ron7_A3	0.052012
Ron7_B2_TS4	Ron7	B2	4	RoNi/7.1	VSVG	0.0001	36	2016-09-06 04:59:00	2016-09-07 07:53:00	8337	26.9	Ron7_B2	0.10129
Ron7_B1_TS4	Ron7	B1	4	RoNi/7.1	VSVG	0.001	36	2016-09-06 04:59:00	2016-09-07 07:55:00	18429	26.9333	Ron7_B1	0.223903
Ron7_A1_TS5	Ron7	A1	5	RoNi/7.1	VSVG	0.001	36	2016-09-06 04:59:00	2016-09-07 17:42:00	13042	36.7167	Ron7_A1	0.158454
Ron7_A2_TS5	Ron7	A2	5	RoNi/7.1	VSVG	0.0001	36	2016-09-06 04:59:00	2016-09-07 17:43:00	11868	36.7333	Ron7_A2	0.14419
Ron7_A3_TS5	Ron7	A3	5	RoNi/7.1	VSVG	0.0001	36	2016-09-06 04:59:00	2016-09-07 17:44:00	9107	36.75	Ron7_A3	0.110645
Ron7_B2_TS5	Ron7	B2	5	RoNi/7.1	VSVG	0.0001	36	2016-09-06 04:59:00	2016-09-07 17:50:00	12772	36.85	Ron7_B2	0.155173
Ron7_B1_TS5	Ron7	B1	5	RoNi/7.1	VSVG	0.001	36	2016-09-06 04:59:00	2016-09-07 17:51:00	12451	36.8667	Ron7_B1	0.151273
Ron8_A1_TS1	Ron8	A1	1	RoNi/7.1	VSVG	0.001	36	2016-09-06 04:59:00	2016-09-06 14:51:00	517	9.86667	Ron8_A1	0.00628128
Ron8_A2_TS1	Ron8	A2	1	RoNi/7.1	VSVG	0.0001	36	2016-09-06 04:59:00	2016-09-06 14:55:00	169	9.93333	Ron8_A2	0.00205326
Ron8_A3_TS1	Ron8	A3	1	RoNi/7.1	VSVG	0.0001	36	2016-09-06 04:59:00	2016-09-06 14:58:00	27	9.98333	Ron8_A3	0.000328036
Ron8_B2_TS1	Ron8	B2	1	RoNi/7.1	VSVG	0.0001	36	2016-09-06 04:59:00	2016-09-06 15:06:00	279	10.1167	Ron8_B2	0.00338971
Ron8_B1_TS1	Ron8	B1	1	RoNi/7.1	VSVG	0.001	36	2016-09-06 04:59:00	2016-09-06 15:08:00	410	10.15	Ron8_B1	0.00498129
Ron8_A1_TS2	Ron8	A1	2	RoNi/7.1	VSVG	0.001	36	2016-09-06 04:59:00	2016-09-06 18:17:00	1206	13.3	Ron8_A1	0.0146523
Ron8_A2_TS2	Ron8	A2	2	RoNi/7.1	VSVG	0.0001	36	2016-09-06 04:59:00	2016-09-06 18:20:00	121	13.35	Ron8_A2	0.00147009
Ron8_A3_TS2	Ron8	A3	2	RoNi/7.1	VSVG	0.0001	36	2016-09-06 04:59:00	2016-09-06 18:21:00	293	13.3667	Ron8_A3	0.0035598
Ron8_B2_TS2	Ron8	B2	2	RoNi/7.1	VSVG	0.0001	36	2016-09-06 04:59:00	2016-09-06 18:26:00	391	13.45	Ron8_B2	0.00475045
Ron8_B1_TS2	Ron8	B1	2	RoNi/7.1	VSVG	0.001	36	2016-09-06 04:59:00	2016-09-06 18:27:00	1528	13.4667	Ron8_B1	0.0185644
Ron8_A1_TS3	Ron8	A1	3	RoNi/7.1	VSVG	0.001	36	2016-09-06 04:59:00	2016-09-06 22:25:00	2701	17.4333	Ron8_A1	0.0328158
Ron8_A2_TS3	Ron8	A2	3	RoNi/7.1	VSVG	0.0001	36	2016-09-06 04:59:00	2016-09-06 22:27:00	531	17.4667	Ron8_A2	0.00645138
Ron8_A3_TS3	Ron8	A3	3	RoNi/7.1	VSVG	0.0001	36	2016-09-06 04:59:00	2016-09-06 22:29:00	757	17.5	Ron8_A3	0.00919716
Ron8_B2_TS3	Ron8	B2	3	RoNi/7.1	VSVG	0.0001	36	2016-09-06 04:59:00	2016-09-06 22:34:00	1141	17.5833	Ron8_B2	0.0138626
Ron8_B1_TS3	Ron8	B1	3	RoNi/7.1	VSVG	0.001	36	2016-09-06 04:59:00	2016-09-06 22:35:00	3663	17.6	Ron8_B1	0.0445036
Ron8_A1_TS4	Ron8	A1	4	RoNi/7.1	VSVG	0.001	36	2016-09-06 04:59:00	2016-09-07 08:20:00	11637	27.35	Ron8_A1	0.141384
Ron8_A2_TS4	Ron8	A2	4	RoNi/7.1	VSVG	0.0001	36	2016-09-06 04:59:00	2016-09-07 08:20:00	3168	27.35	Ron8_A2	0.0384896
Ron8_A3_TS4	Ron8	A3	4	RoNi/7.1	VSVG	0.0001	36	2016-09-06 04:59:00	2016-09-07 08:21:00	4203	27.3667	Ron8_A3	0.0510643
Ron8_B2_TS4	Ron8	B2	4	RoNi/7.1	VSVG	0.0001	36	2016-09-06 04:59:00	2016-09-07 08:26:00	6630	27.45	Ron8_B2	0.0805511
Ron8_B1_TS4	Ron8	B1	4	RoNi/7.1	VSVG	0.001	36	2016-09-06 04:59:00	2016-09-07 08:27:00	15867	27.4667	Ron8_B1	0.192776
Ron8_A1_TS5	Ron8	A1	5	RoNi/7.1	VSVG	0.001	36	2016-09-06 04:59:00	2016-09-07 18:36:00	15209	37.6167	Ron8_A1	0.184782
Ron8_A2_TS5	Ron8	A2	5	RoNi/7.1	VSVG	0.0001	36	2016-09-06 04:59:00	2016-09-07 18:37:00	8327	37.6333	Ron8_A2	0.101169
Ron8_A3_TS5	Ron8	A3	5	RoNi/7.1	VSVG	0.0001	36	2016-09-06 04:59:00	2016-09-07 18:38:00	8739	37.65	Ron8_A3	0.106174
Ron8_B2_TS5	Ron8	B2	5	RoNi/7.1	VSVG	0.0001	36	2016-09-06 04:59:00	2016-09-07 18:42:00	12337	37.7167	Ron8_B2	0.149888
Ron8_B1_TS5	Ron8	B1	5	RoNi/7.1	VSVG	0.001	36	2016-09-06 04:59:00	2016-09-07 18:44:00	15502	37.75	Ron8_B1	0.188341
Ron8_A1_TS6	Ron8	A1	6	RoNi/7.1	VSVG	0.001	36	2016-09-06 04:59:00	2016-09-08 08:35:00	3191	51.6	Ron8_A1	0.038769
Ron8_A2_TS6	Ron8	A2	6	RoNi/7.1	VSVG	0.0001	36	2016-09-06 04:59:00	2016-09-08 08:37:00	8172	51.6333	Ron8_A2	0.0992856
Ron8_A3_TS6	Ron8	A3	6	RoNi/7.1	VSVG	0.0001	36	2016-09-06 04:59:00	2016-09-08 08:39:00	8494	51.6667	Ron8_A3	0.103198
Ron8_B2_TS6	Ron8	B2	6	RoNi/7.1	VSVG	0.0001	36	2016-09-06 04:59:00	2016-09-08 08:44:00	4327	51.75	Ron8_B2	0.0525708
Ron8_B1_TS6	Ron8	B1	6	RoNi/7.1	VSVG	0.001	36	2016-09-06 04:59:00	2016-09-08 08:46:00	2059	51.7833	Ron8_B1	0.0250158
Ron9_A1_TS1	Ron9	A1	1	RoNi/7.1	EBOV	0.001	36	2016-09-13 05:07:00	2016-09-13 12:09:00	0	7.03333	Ron9_A1	0
Ron9_A2_TS1	Ron9	A2	1	RoNi/7.1	EBOV	0.0001	36	2016-09-13 05:07:00	2016-09-13 12:11:00	0	7.06667	Ron9_A2	0
Ron9_A3_TS1	Ron9	A3	1	RoNi/7.1	EBOV	0.001	36	2016-09-13 05:07:00	2016-09-13 12:13:00	29	7.1	Ron9_A3	0.000352335
Ron9_B2_TS1	Ron9	B2	1	RoNi/7.1	EBOV	0.0001	36	2016-09-13 05:07:00	2016-09-13 12:17:00	0	7.16667	Ron9_B2	0
Ron9_B1_TS1	Ron9	B1	1	RoNi/7.1	EBOV	0.001	36	2016-09-13 05:07:00	2016-09-13 12:19:00	0	7.2	Ron9_B1	0
Ron9_A1_TS2	Ron9	A1	2	RoNi/7.1	EBOV	0.001	36	2016-09-13 05:07:00	2016-09-13 15:39:00	79	10.5333	Ron9_A1	0.000959809
Ron9_A2_TS2	Ron9	A2	2	RoNi/7.1	EBOV	0.0001	36	2016-09-13 05:07:00	2016-09-13 15:43:00	0	10.6	Ron9_A2	0
Ron9_A3_TS2	Ron9	A3	2	RoNi/7.1	EBOV	0.001	36	2016-09-13 05:07:00	2016-09-13 15:46:00	164	10.65	Ron9_A3	0.00199252
Ron9_B2_TS2	Ron9	B2	2	RoNi/7.1	EBOV	0.0001	36	2016-09-13 05:07:00	2016-09-13 15:53:00	0	10.7667	Ron9_B2	0
Ron9_B1_TS2	Ron9	B1	2	RoNi/7.1	EBOV	0.001	36	2016-09-13 05:07:00	2016-09-13 15:56:00	52	10.8167	Ron9_B1	0.000631773
Ron9_A1_TS3	Ron9	A1	3	RoNi/7.1	EBOV	0.001	36	2016-09-13 05:07:00	2016-09-13 19:06:00	152	13.9833	Ron9_A1	0.00184672
Ron9_A2_TS3	Ron9	A2	3	RoNi/7.1	EBOV	0.0001	36	2016-09-13 05:07:00	2016-09-13 19:08:00	9	14.0167	Ron9_A2	0.000109345
Ron9_A3_TS3	Ron9	A3	3	RoNi/7.1	EBOV	0.001	36	2016-09-13 05:07:00	2016-09-13 19:09:00	186	14.0333	Ron9_A3	0.0022598
Ron9_B2_TS3	Ron9	B2	3	RoNi/7.1	EBOV	0.0001	36	2016-09-13 05:07:00	2016-09-13 19:14:00	35	14.1167	Ron9_B2	0.000425232
Ron9_B1_TS3	Ron9	B1	3	RoNi/7.1	EBOV	0.001	36	2016-09-13 05:07:00	2016-09-13 19:16:00	243	14.15	Ron9_B1	0.00295233
Ron9_A1_TS4	Ron9	A1	4	RoNi/7.1	EBOV	0.001	36	2016-09-13 05:07:00	2016-09-13 21:58:00	259	16.85	Ron9_A1	0.00314672
Ron9_A2_TS4	Ron9	A2	4	RoNi/7.1	EBOV	0.0001	36	2016-09-13 05:07:00	2016-09-13 22:00:00	1	16.8833	Ron9_A2	1.21495e-05
Ron9_A3_TS4	Ron9	A3	4	RoNi/7.1	EBOV	0.001	36	2016-09-13 05:07:00	2016-09-13 22:02:00	325	16.9167	Ron9_A3	0.00394858
Ron9_B2_TS4	Ron9	B2	4	RoNi/7.1	EBOV	0.0001	36	2016-09-13 05:07:00	2016-09-13 22:07:00	175	17	Ron9_B2	0.00212616
Ron9_B1_TS4	Ron9	B1	4	RoNi/7.1	EBOV	0.001	36	2016-09-13 05:07:00	2016-09-13 22:04:00	356	16.95	Ron9_B1	0.00432522
Ron9_A1_TS5	Ron9	A1	5	RoNi/7.1	EBOV	0.001	36	2016-09-13 05:07:00	2016-09-14 08:38:00	1118	27.5167	Ron9_A1	0.0135831
Ron9_A2_TS5	Ron9	A2	5	RoNi/7.1	EBOV	0.0001	36	2016-09-13 05:07:00	2016-09-14 08:40:00	205	27.55	Ron9_A2	0.00249064
Ron9_A3_TS5	Ron9	A3	5	RoNi/7.1	EBOV	0.001	36	2016-09-13 05:07:00	2016-09-14 08:42:00	1077	27.5833	Ron9_A3	0.013085
Ron9_B2_TS5	Ron9	B2	5	RoNi/7.1	EBOV	0.0001	36	2016-09-13 05:07:00	2016-09-14 08:46:00	180	27.65	Ron9_B2	0.00218691
Ron9_B1_TS5	Ron9	B1	5	RoNi/7.1	EBOV	0.001	36	2016-09-13 05:07:00	2016-09-14 08:47:00	1287	27.6667	Ron9_B1	0.0156364
Ver10_A1_TS1	Ver10	A1	1	Vero	VSVG	0.001	36	2016-08-13 07:47:00	2016-08-13 16:06:00	0	8.31667	Ver10_A1	0
Ver10_A2_TS1	Ver10	A2	1	Vero	VSVG	0.0001	36	2016-08-13 07:47:00	2016-08-13 16:10:00	26	8.38333	Ver10_A2	0.000250694
Ver10_A3_TS1	Ver10	A3	1	Vero	VSVG	0.001	36	2016-08-13 07:47:00	2016-08-13 16:15:00	0	8.46667	Ver10_A3	0
Ver10_B2_TS1	Ver10	B2	1	Vero	VSVG	0.0001	36	2016-08-13 07:47:00	2016-08-13 16:24:00	0	8.61667	Ver10_B2	0
Ver10_B1_TS1	Ver10	B1	1	Vero	VSVG	0.001	36	2016-08-13 07:47:00	2016-08-13 16:28:00	0	8.68333	Ver10_B1	0
Ver10_A1_TS2	Ver10	A1	2	Vero	VSVG	0.001	36	2016-08-13 07:47:00	2016-08-13 19:25:00	57	11.6333	Ver10_A1	0.000549599
Ver10_A2_TS2	Ver10	A2	2	Vero	VSVG	0.0001	36	2016-08-13 07:47:00	2016-08-13 19:29:00	122	11.7	Ver10_A2	0.00117633
Ver10_A3_TS2	Ver10	A3	2	Vero	VSVG	0.001	36	2016-08-13 07:47:00	2016-08-13 19:31:00	175	11.7333	Ver10_A3	0.00168737
Ver10_B2_TS2	Ver10	B2	2	Vero	VSVG	0.0001	36	2016-08-13 07:47:00	2016-08-13 19:39:00	146	11.8667	Ver10_B2	0.00140774
Ver10_B1_TS2	Ver10	B1	2	Vero	VSVG	0.001	36	2016-08-13 07:47:00	2016-08-13 19:42:00	61	11.9167	Ver10_B1	0.000588167
Ver10_A1_TS3	Ver10	A1	3	Vero	VSVG	0.001	36	2016-08-13 07:47:00	2016-08-13 21:15:00	458	13.4667	Ver10_A1	0.00441608
Ver10_A2_TS3	Ver10	A2	3	Vero	VSVG	0.0001	36	2016-08-13 07:47:00	2016-08-13 21:18:00	445	13.5167	Ver10_A2	0.00429073
Ver10_A3_TS3	Ver10	A3	3	Vero	VSVG	0.001	36	2016-08-13 07:47:00	2016-08-13 21:21:00	768	13.5667	Ver10_A3	0.00740512
Ver10_B2_TS3	Ver10	B2	3	Vero	VSVG	0.0001	36	2016-08-13 07:47:00	2016-08-13 21:27:00	190	13.6667	Ver10_B2	0.001832
Ver10_B1_TS3	Ver10	B1	3	Vero	VSVG	0.001	36	2016-08-13 07:47:00	2016-08-13 21:32:00	612	13.75	Ver10_B1	0.00590096
Ver10_A1_TS4	Ver10	A1	4	Vero	VSVG	0.001	36	2016-08-13 07:47:00	2016-08-14 03:48:00	5451	20.0167	Ver10_A1	0.052559
Ver10_A2_TS4	Ver10	A2	4	Vero	VSVG	0.0001	36	2016-08-13 07:47:00	2016-08-14 03:50:00	7238	20.05	Ver10_A2	0.0697894
Ver10_A3_TS4	Ver10	A3	4	Vero	VSVG	0.001	36	2016-08-13 07:47:00	2016-08-14 03:50:00	7646	20.05	Ver10_A3	0.0737234
Ver10_B2_TS4	Ver10	B2	4	Vero	VSVG	0.0001	36	2016-08-13 07:47:00	2016-08-14 03:54:00	3287	20.1167	Ver10_B2	0.0316935
Ver10_B1_TS4	Ver10	B1	4	Vero	VSVG	0.001	36	2016-08-13 07:47:00	2016-08-14 03:55:00	5999	20.1333	Ver10_B1	0.0578429
Ver11_A1_TS1	Ver11	A1	1	Vero	VSVG	0.001	36	2016-08-13 07:47:00	2016-08-13 17:18:00	0	9.51667	Ver11_A1	0
Ver11_A2_TS1	Ver11	A2	1	Vero	VSVG	0.0001	36	2016-08-13 07:47:00	2016-08-13 17:21:00	0	9.56667	Ver11_A2	0
Ver11_A3_TS1	Ver11	A3	1	Vero	VSVG	0.001	36	2016-08-13 07:47:00	2016-08-13 17:24:00	22	9.61667	Ver11_A3	0.000212126
Ver11_B2_TS1	Ver11	B2	1	Vero	VSVG	0.0001	36	2016-08-13 07:47:00	2016-08-13 17:31:00	0	9.73333	Ver11_B2	0
Ver11_B1_TS1	Ver11	B1	1	Vero	VSVG	0.001	36	2016-08-13 07:47:00	2016-08-13 17:34:00	5	9.78333	Ver11_B1	4.82104e-05
Ver11_A1_TS2	Ver11	A1	2	Vero	VSVG	0.001	36	2016-08-13 07:47:00	2016-08-13 19:47:00	264	12	Ver11_A1	0.00254551
Ver11_A2_TS2	Ver11	A2	2	Vero	VSVG	0.0001	36	2016-08-13 07:47:00	2016-08-13 19:50:00	70	12.05	Ver11_A2	0.000674946
Ver11_A3_TS2	Ver11	A3	2	Vero	VSVG	0.001	36	2016-08-13 07:47:00	2016-08-13 19:54:00	111	12.1167	Ver11_A3	0.00107027
Ver11_B2_TS2	Ver11	B2	2	Vero	VSVG	0.0001	36	2016-08-13 07:47:00	2016-08-13 20:01:00	70	12.2333	Ver11_B2	0.000674946
Ver11_B1_TS2	Ver11	B1	2	Vero	VSVG	0.001	36	2016-08-13 07:47:00	2016-08-13 20:04:00	289	12.2833	Ver11_B1	0.00278656
Ver11_A1_TS3	Ver11	A1	3	Vero	VSVG	0.001	36	2016-08-13 07:47:00	2016-08-13 21:40:00	944	13.8833	Ver11_A1	0.00910213
Ver11_A2_TS3	Ver11	A2	3	Vero	VSVG	0.0001	36	2016-08-13 07:47:00	2016-08-13 21:41:00	433	13.9	Ver11_A2	0.00417502
Ver11_A3_TS3	Ver11	A3	3	Vero	VSVG	0.001	36	2016-08-13 07:47:00	2016-08-13 21:44:00	328	13.95	Ver11_A3	0.0031626
Ver11_B2_TS3	Ver11	B2	3	Vero	VSVG	0.0001	36	2016-08-13 07:47:00	2016-08-13 21:49:00	502	14.0333	Ver11_B2	0.00484033
Ver11_B1_TS3	Ver11	B1	3	Vero	VSVG	0.001	36	2016-08-13 07:47:00	2016-08-13 21:52:00	1623	14.0833	Ver11_B1	0.0156491
Ver11_A1_TS4	Ver11	A1	4	Vero	VSVG	0.001	36	2016-08-13 07:47:00	2016-08-14 04:41:00	11882	20.9	Ver11_A1	0.114567
Ver11_A2_TS4	Ver11	A2	4	Vero	VSVG	0.0001	36	2016-08-13 07:47:00	2016-08-14 04:42:00	14417	20.9167	Ver11_A2	0.13901
Ver11_A3_TS4	Ver11	A3	4	Vero	VSVG	0.001	36	2016-08-13 07:47:00	2016-08-14 04:43:00	7150	20.9333	Ver11_A3	0.0689409
Ver11_B2_TS4	Ver11	B2	4	Vero	VSVG	0.0001	36	2016-08-13 07:47:00	2016-08-14 04:52:00	12504	21.0833	Ver11_B2	0.120565
Ver11_B1_TS4	Ver11	B1	4	Vero	VSVG	0.001	36	2016-08-13 07:47:00	2016-08-14 04:53:00	14311	21.1	Ver11_B1	0.137988
Ver11_A1_TS5	Ver11	A1	5	Vero	VSVG	0.001	36	2016-08-13 07:47:00	2016-08-14 06:03:00	14909	22.2667	Ver11_A1	0.143754
Ver11_A2_TS5	Ver11	A2	5	Vero	VSVG	0.0001	36	2016-08-13 07:47:00	2016-08-14 06:05:00	18758	22.3	Ver11_A2	0.180866
Ver11_A3_TS5	Ver11	A3	5	Vero	VSVG	0.001	36	2016-08-13 07:47:00	2016-08-14 06:06:00	9324	22.3167	Ver11_A3	0.0899028
Ver11_B2_TS5	Ver11	B2	5	Vero	VSVG	0.0001	36	2016-08-13 07:47:00	2016-08-14 06:12:00	16952	22.4167	Ver11_B2	0.163453
Ver11_B1_TS5	Ver11	B1	5	Vero	VSVG	0.001	36	2016-08-13 07:47:00	2016-08-14 06:14:00	17964	22.45	Ver11_B1	0.17321
Ver12_A1_TS1	Ver12	A1	1	Vero	VSVG	0.0001	36	2016-08-15 20:58:00	2016-08-16 05:30:00	0	8.53333	Ver12_A1	0
Ver12_A3_TS1	Ver12	A3	1	Vero	VSVG	0.0001	36	2016-08-15 20:58:00	2016-08-16 05:41:00	11	8.71667	Ver12_A3	0.000106063
Ver12_B1_TS1	Ver12	B1	1	Vero	VSVG	0.0001	36	2016-08-15 20:58:00	2016-08-16 05:53:00	0	8.91667	Ver12_B1	0
Ver12_A1_TS2	Ver12	A1	2	Vero	VSVG	0.0001	36	2016-08-15 20:58:00	2016-08-16 08:01:00	324	11.05	Ver12_A1	0.00312404
Ver12_A3_TS2	Ver12	A3	2	Vero	VSVG	0.0001	36	2016-08-15 20:58:00	2016-08-16 08:08:00	348	11.1667	Ver12_A3	0.00335545
Ver12_B1_TS2	Ver12	B1	2	Vero	VSVG	0.0001	36	2016-08-15 20:58:00	2016-08-16 08:18:00	146	11.3333	Ver12_B1	0.00140774
Ver12_A1_TS3	Ver12	A1	3	Vero	VSVG	0.0001	36	2016-08-15 20:58:00	2016-08-16 11:46:00	2258	14.8	Ver12_A1	0.0217718
Ver12_A3_TS3	Ver12	A3	3	Vero	VSVG	0.0001	36	2016-08-15 20:58:00	2016-08-16 11:51:00	3170	14.8833	Ver12_A3	0.0305654
Ver12_B1_TS3	Ver12	B1	3	Vero	VSVG	0.0001	36	2016-08-15 20:58:00	2016-08-16 11:58:00	2598	15	Ver12_B1	0.0250501
Ver12_A1_TS4	Ver12	A1	4	Vero	VSVG	0.0001	36	2016-08-15 20:58:00	2016-08-16 14:10:00	6734	17.2	Ver12_A1	0.0649298
Ver12_A3_TS4	Ver12	A3	4	Vero	VSVG	0.0001	36	2016-08-15 20:58:00	2016-08-16 14:14:00	11047	17.2667	Ver12_A3	0.106516
Ver12_B1_TS4	Ver12	B1	4	Vero	VSVG	0.0001	36	2016-08-15 20:58:00	2016-08-16 14:20:00	6740	17.3667	Ver12_B1	0.0649877
Ver12_A1_TS5	Ver12	A1	5	Vero	VSVG	0.0001	36	2016-08-15 20:58:00	2016-08-16 16:46:00	12280	19.8	Ver12_A1	0.118405
Ver12_A3_TS5	Ver12	A3	5	Vero	VSVG	0.0001	36	2016-08-15 20:58:00	2016-08-16 16:48:00	19784	19.8333	Ver12_A3	0.190759
Ver12_B1_TS5	Ver12	B1	5	Vero	VSVG	0.0001	36	2016-08-15 20:58:00	2016-08-16 16:53:00	12210	19.9167	Ver12_B1	0.11773
Ver12_A1_TS6	Ver12	A1	6	Vero	VSVG	0.0001	36	2016-08-15 20:58:00	2016-08-16 18:40:00	19314	21.7	Ver12_A1	0.186227
Ver12_A3_TS6	Ver12	A3	6	Vero	VSVG	0.0001	36	2016-08-15 20:58:00	2016-08-16 18:43:00	26617	21.75	Ver12_A3	0.256643
Ver12_B1_TS6	Ver12	B1	6	Vero	VSVG	0.0001	36	2016-08-15 20:58:00	2016-08-16 18:49:00	20535	21.85	Ver12_B1	0.198
Ver13_A1_TS1	Ver13	A1	1	Vero	VSVG	0.0001	36	2016-08-15 20:58:00	2016-08-16 06:21:00	0	9.38333	Ver13_A1	0
Ver13_B1_TS1	Ver13	B1	1	Vero	VSVG	0.0001	36	2016-08-15 20:58:00	2016-08-16 06:40:00	2	9.7	Ver13_B1	1.92842e-05
Ver13_A1_TS2	Ver13	A1	2	Vero	VSVG	0.0001	36	2016-08-15 20:58:00	2016-08-16 08:49:00	282	11.85	Ver13_A1	0.00271907
Ver13_B1_TS2	Ver13	B1	2	Vero	VSVG	0.0001	36	2016-08-15 20:58:00	2016-08-16 09:06:00	240	12.1333	Ver13_B1	0.0023141
Ver13_A1_TS3	Ver13	A1	3	Vero	VSVG	0.0001	36	2016-08-15 20:58:00	2016-08-16 12:30:00	2041	15.5333	Ver13_A1	0.0196795
Ver13_B1_TS3	Ver13	B1	3	Vero	VSVG	0.0001	36	2016-08-15 20:58:00	2016-08-16 12:42:00	2977	15.7333	Ver13_B1	0.0287045
Ver13_A1_TS4	Ver13	A1	4	Vero	VSVG	0.0001	36	2016-08-15 20:58:00	2016-08-16 14:43:00	6804	17.75	Ver13_A1	0.0656048
Ver13_B1_TS4	Ver13	B1	4	Vero	VSVG	0.0001	36	2016-08-15 20:58:00	2016-08-16 14:51:00	8630	17.8833	Ver13_B1	0.0832112
Ver13_A1_TS5	Ver13	A1	5	Vero	VSVG	0.0001	36	2016-08-15 20:58:00	2016-08-16 17:16:00	11615	20.3	Ver13_A1	0.111993
Ver13_B1_TS5	Ver13	B1	5	Vero	VSVG	0.0001	36	2016-08-15 20:58:00	2016-08-16 17:23:00	14825	20.4167	Ver13_B1	0.142944
Ver13_A1_TS6	Ver13	A1	6	Vero	VSVG	0.0001	36	2016-08-15 20:58:00	2016-08-16 19:08:00	15834	22.1667	Ver13_A1	0.152673
Ver13_B1_TS6	Ver13	B1	6	Vero	VSVG	0.0001	36	2016-08-15 20:58:00	2016-08-16 19:16:00	20893	22.3	Ver13_B1	0.201452
Ver13_A1_TS7	Ver13	A1	7	Vero	VSVG	0.0001	36	2016-08-15 20:58:00	2016-08-17 07:16:00	23108	34.3	Ver13_A1	0.222809
Ver13_B1_TS7	Ver13	B1	7	Vero	VSVG	0.0001	36	2016-08-15 20:58:00	2016-08-17 07:26:00	25308	34.4667	Ver13_B1	0.244022
Ver14_A1_TS1	Ver14	A1	1	Vero	EBOV	0.001	36	2016-08-18 05:06:00	2016-08-18 13:13:00	0	8.11667	Ver14_A1	0
Ver14_A2_TS1	Ver14	A2	1	Vero	EBOV	0.0001	36	2016-08-18 05:06:00	2016-08-18 13:15:00	0	8.15	Ver14_A2	0
[truncated: 882 more rows]

## Sheet: B-Susceptibles-Raw
PhotoID	Plate.ID	well	cell_type	virus	date_time_initial_infection	MOI	date_time_fixation	num_photo_subfields	time_elapsed	live_cell_count	prop_S
Pak10_A1_TS8_DaPi_cell	Pak10	A1	PaKiT01	EBOV	2016-08-10 05:40:00	0.001	2016-08-11 09:27:00	36	27.7833	24236	0.262769
Pak10_A2_TS8_DaPi_cell	Pak10	A2	PaKiT01	EBOV	2016-08-10 05:40:00	0.0001	2016-08-11 09:27:00	36	27.7833	54383	0.589626
Pak10_A3_TS8_DaPi_cell	Pak10	A3	PaKiT01	EBOV	2016-08-10 05:40:00	0.0001	2016-08-11 09:27:00	36	27.7833	33683	0.365195
Pak10_B1_TS8_DaPi_cell	Pak10	B1	PaKiT01	EBOV	2016-08-10 05:40:00	0.001	2016-08-11 09:27:00	36	27.7833	39174	0.424729
Pak10_B2_TS8_DaPi_cell	Pak10	B2	PaKiT01	EBOV	2016-08-10 05:40:00	0.0001	2016-08-11 09:27:00	36	27.7833	65881	0.714289
Pak10_B3_TS8_DaPi_cell	Pak10	B3	PaKiT01	EBOV	2016-08-10 05:40:00	control	2016-08-11 09:27:00	36	27.7833	58025	0.629113
Pak11_A1_TS6_DaPi_cell	Pak11	A1	PaKiT01	VSVG	2016-08-13 08:12:00	0.001	2016-08-14 05:58:00	36	21.7667	37416	0.405668
Pak11_A2_TS6_DaPi_cell	Pak11	A2	PaKiT01	VSVG	2016-08-13 08:12:00	0.0001	2016-08-14 05:58:00	36	21.7667	41184	0.446521
Pak11_A3_TS6_DaPi_cell	Pak11	A3	PaKiT01	VSVG	2016-08-13 08:12:00	0.001	2016-08-14 05:58:00	36	21.7667	28372	0.307612
Pak11_B1_TS6_DaPi_cell	Pak11	B1	PaKiT01	VSVG	2016-08-13 08:12:00	0.001	2016-08-14 05:58:00	36	21.7667	26355	0.285744
Pak11_B2_TS6_DaPi_cell	Pak11	B2	PaKiT01	VSVG	2016-08-13 08:12:00	0.0001	2016-08-14 05:58:00	36	21.7667	30831	0.334273
Pak11_B3_TS6_DaPi_cell	Pak11	B3	PaKiT01	VSVG	2016-08-13 08:12:00	control	2016-08-14 05:58:00	36	21.7667	61623	0.668123
Pak12_A1_TS5_DaPi_cell	Pak12	A1	PaKiT01	VSVG	2016-08-13 08:12:00	0.001	2016-08-14 04:21:00	36	20.15	33472	0.362907
Pak12_A2_TS5_DaPi_cell	Pak12	A2	PaKiT01	VSVG	2016-08-13 08:12:00	0.0001	2016-08-14 04:21:00	36	20.15	36677	0.397656
Pak12_A3_TS5_DaPi_cell	Pak12	A3	PaKiT01	VSVG	2016-08-13 08:12:00	0.001	2016-08-14 04:21:00	36	20.15	32782	0.355426
Pak12_B1_TS5_DaPi_cell	Pak12	B1	PaKiT01	VSVG	2016-08-13 08:12:00	0.001	2016-08-14 04:21:00	36	20.15	35935	0.389611
Pak12_B2_TS5_DaPi_cell	Pak12	B2	PaKiT01	VSVG	2016-08-13 08:12:00	0.0001	2016-08-14 04:21:00	36	20.15	29570	0.320601
Pak12_B3_TS5_DaPi_cell	Pak12	B3	PaKiT01	VSVG	2016-08-13 08:12:00	control	2016-08-14 04:21:00	36	20.15	56136	0.608632
Pak13_A1_TS5_DaPi_cell	Pak13	A1	PaKiT01	VSVG	2016-08-13 08:12:00	0.001	2016-08-14 04:58:00	36	20.7667	29305	0.317728
Pak13_A2_TS5_DaPi_cell	Pak13	A2	PaKiT01	VSVG	2016-08-13 08:12:00	0.0001	2016-08-14 04:58:00	36	20.7667	37520	0.406796
Pak13_A3_TS5_DaPi_cell	Pak13	A3	PaKiT01	VSVG	2016-08-13 08:12:00	0.001	2016-08-14 04:58:00	36	20.7667	23169	0.251201
Pak13_B1_TS5_DaPi_cell	Pak13	B1	PaKiT01	VSVG	2016-08-13 08:12:00	0.001	2016-08-14 04:58:00	36	20.7667	36453	0.395227
Pak13_B2_TS5_DaPi_cell	Pak13	B2	PaKiT01	VSVG	2016-08-13 08:12:00	0.0001	2016-08-14 04:58:00	36	20.7667	31932	0.34621
Pak13_B3_TS5_DaPi_cell	Pak13	B3	PaKiT01	VSVG	2016-08-13 08:12:00	control	2016-08-14 04:58:00	36	20.7667	50456	0.547049
Pak14_A1_TS6_DaPi_cell	Pak14	A1	PaKiT01	VSVG	2016-08-13 08:12:00	0.001	2016-08-14 06:13:00	36	22.0167	31382	0.340247
Pak14_A2_TS6_DaPi_cell	Pak14	A2	PaKiT01	VSVG	2016-08-13 08:12:00	0.0001	2016-08-14 06:13:00	36	22.0167	33818	0.366658
Pak14_A3_TS6_DaPi_cell	Pak14	A3	PaKiT01	VSVG	2016-08-13 08:12:00	0.0001	2016-08-14 06:13:00	36	22.0167	44429	0.481704
Pak14_B1_TS6_DaPi_cell	Pak14	B1	PaKiT01	VSVG	2016-08-13 08:12:00	0.001	2016-08-14 06:13:00	36	22.0167	26502	0.287338
Pak14_B2_TS6_DaPi_cell	Pak14	B2	PaKiT01	VSVG	2016-08-13 08:12:00	0.0001	2016-08-14 06:13:00	36	22.0167	41277	0.44753
Pak14_B3_TS6_DaPi_cell	Pak14	B3	PaKiT01	VSVG	2016-08-13 08:12:00	control	2016-08-14 06:13:00	36	22.0167	53203	0.576833
Pak15_A1_TS8_DaPi_cell	Pak15	A1	PaKiT01	VSVG	2016-08-15 21:26:00	0.0001	2016-08-17 07:45:00	36	34.3167	13541	0.146813
Pak15_A3_TS8_DaPi_cell	Pak15	A3	PaKiT01	VSVG	2016-08-15 21:26:00	0.0001	2016-08-17 07:45:00	36	34.3167	21009	0.227782
Pak15_B1_TS8_DaPi_cell	Pak15	B1	PaKiT01	VSVG	2016-08-15 21:26:00	0.0001	2016-08-17 07:45:00	36	34.3167	20900	0.2266
Pak15_B3_TS8_DaPi_cell	Pak15	B3	PaKiT01	VSVG	2016-08-15 21:26:00	control	2016-08-17 07:45:00	36	34.3167	80941	0.877571
Pak16_A1_TS7_DaPi_cell	Pak16	A1	PaKiT01	VSVG	2016-08-15 21:26:00	0.0001	2016-08-16 19:43:00	36	22.2833	54413	0.589952
Pak16_A3_TS7_DaPi_cell	Pak16	A3	PaKiT01	VSVG	2016-08-15 21:26:00	0.0001	2016-08-16 19:43:00	36	22.2833	71187	0.771817
Pak16_B1_TS7_DaPi_cell	Pak16	B1	PaKiT01	VSVG	2016-08-15 21:26:00	0.0001	2016-08-16 19:43:00	36	22.2833	61003	0.661401
Pak16_B3_TS7_DaPi_cell	Pak16	B3	PaKiT01	VSVG	2016-08-15 21:26:00	control	2016-08-16 19:43:00	36	22.2833	89888	0.974575
Pak17_A1_TS8_DaPi_cell	Pak17	A1	PaKiT01	VSVG	2016-08-15 21:26:00	0.0001	2016-08-17 07:54:00	36	34.4667	25744	0.279119
Pak17_A3_TS8_DaPi_cell	Pak17	A3	PaKiT01	VSVG	2016-08-15 21:26:00	0.0001	2016-08-17 07:54:00	36	34.4667	39725	0.430703
Pak17_B1_TS8_DaPi_cell	Pak17	B1	PaKiT01	VSVG	2016-08-15 21:26:00	0.0001	2016-08-17 07:54:00	36	34.4667	32104	0.348075
Pak17_B3_TS8_DaPi_cell	Pak17	B3	PaKiT01	VSVG	2016-08-15 21:26:00	control	2016-08-17 07:54:00	36	34.4667	84574	0.91696
Pak18_A1_TS8_DaPi_cell	Pak18	A1	PaKiT01	VSVG	2016-08-15 21:26:00	0.0001	2016-08-17 08:16:00	36	34.8333	12176	0.132013
Pak18_A3_TS8_DaPi_cell	Pak18	A3	PaKiT01	VSVG	2016-08-15 21:26:00	0.0001	2016-08-17 08:16:00	36	34.8333	28022	0.303818
Pak18_B1_TS8_DaPi_cell	Pak18	B1	PaKiT01	VSVG	2016-08-15 21:26:00	0.0001	2016-08-17 08:16:00	36	34.8333	25380	0.275173
Pak18_B3_TS8_DaPi_cell	Pak18	B3	PaKiT01	VSVG	2016-08-15 21:26:00	control	2016-08-17 08:16:00	36	34.8333	79770	0.864875
Pak19_A1_TS4_DaPi_cell	Pak19	A1	PaKiT01	VSVG	2016-08-25 21:34:00	0.0001	2016-08-26 15:27:00	36	17.8833	72820	0.789522
Pak19_A3_TS4_DaPi_cell	Pak19	A3	PaKiT01	VSVG	2016-08-25 21:34:00	0.0001	2016-08-26 15:27:00	36	17.8833	68889	0.746902
Pak2_A1_TS19_DaPi_cell	Pak2	A1	PaKiT01	EBOV	2016-07-22 17:15:00	0.0001	2016-07-30 10:55:00	64	185.667	62833	0.681242
Pak2_A3_TS19_DaPi_cell	Pak2	A3	PaKiT01	EBOV	2016-07-22 17:15:00	0.001	2016-07-30 10:55:00	64	185.667	57790	0.626565
Pak2_B1_TS19_DaPi_cell	Pak2	B1	PaKiT01	EBOV	2016-07-22 17:15:00	0.0001	2016-07-30 10:55:00	64	185.667	57578	0.624267
Pak2_B3_TS19_DaPi_cell	Pak2	B3	PaKiT01	EBOV	2016-07-22 17:15:00	control	2016-07-30 10:55:00	64	185.667	47116	0.510837
Pak20_A3_TS5_DaPi_cell	Pak20	A3	PaKiT01	VSVG	2016-08-25 21:34:00	0.0001	2016-08-26 18:01:00	36	20.45	18881	0.20471
Pak20_B1_TS5_DaPi_cell	Pak20	B1	PaKiT01	VSVG	2016-08-25 21:34:00	0.0001	2016-08-26 18:01:00	36	20.45	48279	0.523446
Pak20_B3_TS5_DaPi_cell	Pak20	B3	PaKiT01	VSVG	2016-08-25 21:34:00	control	2016-08-26 18:01:00	36	20.45	66712	0.723299
Pak21_B1_TS6_DaPi_cell	Pak21	B1	PaKiT01	VSVG	2016-08-25 21:34:00	0.0001	2016-08-26 22:03:00	36	24.4833	56668	0.6144
Pak21_B3_TS6_DaPi_cell	Pak21	B3	PaKiT01	VSVG	2016-08-25 21:34:00	control	2016-08-26 22:03:00	36	24.4833	79291	0.859681
Pak22_A1_TS7_DaPi_cell	Pak22	A1	PaKiT01	VSVG	2016-08-25 21:34:00	0.0001	2016-08-27 09:22:00	36	35.8	25132	0.272484
Pak22_B1_TS7_DaPi_cell	Pak22	B1	PaKiT01	VSVG	2016-08-25 21:34:00	0.0001	2016-08-27 09:22:00	36	35.8	22588	0.244901
Pak22_B3_TS7_DaPi_cell	Pak22	B3	PaKiT01	VSVG	2016-08-25 21:34:00	control	2016-08-27 09:22:00	36	35.8	68867	0.746663
Pak23_A1_TS7_DaPi_cell	Pak23	A1	PaKiT01	EBOV	2016-08-28 05:30:00	0.001	2016-08-29 20:45:00	36	39.25	46218	0.5011
Pak23_A2_TS7_DaPi_cell	Pak23	A2	PaKiT01	EBOV	2016-08-28 05:30:00	0.0001	2016-08-29 20:45:00	36	39.25	62041	0.672655
Pak23_A3_TS7_DaPi_cell	Pak23	A3	PaKiT01	EBOV	2016-08-28 05:30:00	0.001	2016-08-29 20:45:00	36	39.25	32987	0.357649
Pak23_B1_TS7_DaPi_cell	Pak23	B1	PaKiT01	EBOV	2016-08-28 05:30:00	0.001	2016-08-29 20:45:00	36	39.25	45855	0.497165
Pak23_B2_TS7_DaPi_cell	Pak23	B2	PaKiT01	EBOV	2016-08-28 05:30:00	0.0001	2016-08-29 20:45:00	36	39.25	53591	0.581039
Pak23_B3_TS7_DaPi_cell	Pak23	B3	PaKiT01	EBOV	2016-08-28 05:30:00	control	2016-08-29 20:45:00	36	39.25	84425	0.915345
Pak24_A1_TS6_DaPi_cell	Pak24	A1	PaKiT01	EBOV	2016-08-28 05:30:00	0.001	2016-08-29 11:24:00	36	29.9	51646	0.559951
Pak24_A2_TS6_DaPi_cell	Pak24	A2	PaKiT01	EBOV	2016-08-28 05:30:00	0.0001	2016-08-29 11:24:00	36	29.9	84688	0.918196
Pak24_A3_TS6_DaPi_cell	Pak24	A3	PaKiT01	EBOV	2016-08-28 05:30:00	0.001	2016-08-29 11:24:00	36	29.9	51531	0.558705
Pak24_B1_TS6_DaPi_cell	Pak24	B1	PaKiT01	EBOV	2016-08-28 05:30:00	0.001	2016-08-29 11:24:00	36	29.9	63379	0.687162
Pak24_B2_TS6_DaPi_cell	Pak24	B2	PaKiT01	EBOV	2016-08-28 05:30:00	0.0001	2016-08-29 11:24:00	36	29.9	80157	0.869071
Pak24_B3_TS6_DaPi_cell	Pak24	B3	PaKiT01	EBOV	2016-08-28 05:30:00	control	2016-08-29 11:24:00	36	29.9	77643	0.841814
Pak25_A1_TS8_DaPi_cell	Pak25	A1	PaKiT01	EBOV	2016-08-28 05:30:00	0.001	2016-08-30 08:01:00	36	50.5167	33663	0.364978
Pak25_A2_TS8_DaPi_cell	Pak25	A2	PaKiT01	EBOV	2016-08-28 05:30:00	0.0001	2016-08-30 08:01:00	36	50.5167	85605	0.928139
Pak25_A3_TS8_DaPi_cell	Pak25	A3	PaKiT01	EBOV	2016-08-28 05:30:00	0.0001	2016-08-30 08:01:00	36	50.5167	82778	0.897488
Pak25_B1_TS8_DaPi_cell	Pak25	B1	PaKiT01	EBOV	2016-08-28 05:30:00	0.001	2016-08-30 08:01:00	36	50.5167	28076	0.304403
Pak25_B2_TS8_DaPi_cell	Pak25	B2	PaKiT01	EBOV	2016-08-28 05:30:00	0.0001	2016-08-30 08:01:00	36	50.5167	63701	0.690653
Pak25_B3_TS8_DaPi_cell	Pak25	B3	PaKiT01	EBOV	2016-08-28 05:30:00	control	2016-08-30 08:01:00	36	50.5167	92233	1
Pak26_A1_TS13_DaPi_cell	Pak26	A1	PaKiT01	EBOV	2016-08-28 05:30:00	0.001	2016-09-01 20:01:00	36	110.517	20634	0.223716
Pak26_A2_TS13_DaPi_cell	Pak26	A2	PaKiT01	EBOV	2016-08-28 05:30:00	0.0001	2016-09-01 20:01:00	36	110.517	72350	0.784426
Pak26_A3_TS13_DaPi_cell	Pak26	A3	PaKiT01	EBOV	2016-08-28 05:30:00	0.0001	2016-09-01 20:01:00	36	110.517	11759	0.127492
Pak26_B1_TS13_DaPi_cell	Pak26	B1	PaKiT01	EBOV	2016-08-28 05:30:00	0.001	2016-09-01 20:01:00	36	110.517	37777	0.409582
Pak26_B2_TS13_DaPi_cell	Pak26	B2	PaKiT01	EBOV	2016-08-28 05:30:00	0.0001	2016-09-01 20:01:00	36	110.517	68710	0.744961
Pak26_B3_TS13_DaPi_cell	Pak26	B3	PaKiT01	EBOV	2016-08-28 05:30:00	control	2016-09-01 20:01:00	36	110.517	73116	0.792731
Pak27_A1_TS4_DaPi_cell	Pak27	A1	PaKiT01	VSVG	2016-08-30 05:25:00	0.001	2016-08-30 19:02:00	36	13.6167	83833	0.908926
Pak27_A2_TS4_DaPi_cell	Pak27	A2	PaKiT01	VSVG	2016-08-30 05:25:00	0.0001	2016-08-30 19:02:00	36	13.6167	87295	0.946462
Pak27_A3_TS4_DaPi_cell	Pak27	A3	PaKiT01	VSVG	2016-08-30 05:25:00	0.001	2016-08-30 19:02:00	36	13.6167	82571	0.895244
Pak27_B1_TS4_DaPi_cell	Pak27	B1	PaKiT01	VSVG	2016-08-30 05:25:00	0.001	2016-08-30 19:02:00	36	13.6167	80368	0.871358
Pak27_B2_TS4_DaPi_cell	Pak27	B2	PaKiT01	VSVG	2016-08-30 05:25:00	0.0001	2016-08-30 19:02:00	36	13.6167	87436	0.94799
Pak27_B3_TS4_DaPi_cell	Pak27	B3	PaKiT01	VSVG	2016-08-30 05:25:00	control	2016-08-30 19:02:00	36	13.6167	90816	0.984637
Pak28_A1_TS8_DaPi_cell	Pak28	A1	PaKiT01	VSVG	2016-08-30 05:25:00	0.001	2016-09-01 09:58:00	36	52.55	13097	0.141999
Pak28_A2_TS8_DaPi_cell	Pak28	A2	PaKiT01	VSVG	2016-08-30 05:25:00	0.0001	2016-09-01 09:58:00	36	52.55	3494	0.0378823
Pak28_B1_TS8_DaPi_cell	Pak28	B1	PaKiT01	VSVG	2016-08-30 05:25:00	0.001	2016-09-01 09:58:00	36	52.55	25374	0.275108
Pak28_B2_TS8_DaPi_cell	Pak28	B2	PaKiT01	VSVG	2016-08-30 05:25:00	0.0001	2016-09-01 09:58:00	36	52.55	11307	0.122592
Pak28_B3_TS8_DaPi_cell	Pak28	B3	PaKiT01	VSVG	2016-08-30 05:25:00	control	2016-09-01 09:58:00	36	52.55	78878	0.855204
Pak29_A1_TS6_DaPi_cell	Pak29	A1	PaKiT01	VSVG	2016-08-30 05:25:00	0.001	2016-08-31 17:47:00	36	36.3667	21869	0.237106
Pak29_A2_TS6_DaPi_cell	Pak29	A2	PaKiT01	VSVG	2016-08-30 05:25:00	0.0001	2016-08-31 17:47:00	36	36.3667	19362	0.209925
Pak29_A3_TS6_DaPi_cell	Pak29	A3	PaKiT01	VSVG	2016-08-30 05:25:00	0.0001	2016-08-31 17:47:00	36	36.3667	32094	0.347967
Pak29_B1_TS6_DaPi_cell	Pak29	B1	PaKiT01	VSVG	2016-08-30 05:25:00	0.001	2016-08-31 17:47:00	36	36.3667	23202	0.251559
Pak29_B2_TS6_DaPi_cell	Pak29	B2	PaKiT01	VSVG	2016-08-30 05:25:00	0.0001	2016-08-31 17:47:00	36	36.3667	16305	0.176781
Pak29_B3_TS6_DaPi_cell	Pak29	B3	PaKiT01	VSVG	2016-08-30 05:25:00	control	2016-08-31 17:47:00	36	36.3667	80722	0.875197
Pak3_A1_TS20_DaPi_cell	Pak3	A1	PaKiT01	EBOV	2016-07-24 20:55:00	0.0001	2016-08-03 13:23:00	64	232.467	21115	0.228931
Pak3_A3_TS20_DaPi_cell	Pak3	A3	PaKiT01	EBOV	2016-07-24 20:55:00	0.001	2016-08-03 13:23:00	64	232.467	35697	0.387031
Pak3_B1_TS20_DaPi_cell	Pak3	B1	PaKiT01	EBOV	2016-07-24 20:55:00	0.0001	2016-08-03 13:23:00	64	232.467	28015	0.303742
Pak3_B3_TS20_DaPi_cell	Pak3	B3	PaKiT01	EBOV	2016-07-24 20:55:00	control	2016-08-03 13:23:00	64	232.467	45277	0.490898
Pak30_A1_TS8_DaPi_cell	Pak30	A1	PaKiT01	VSVG	2016-08-30 05:25:00	0.001	2016-09-01 19:44:00	36	62.3167	16146	0.175057
Pak30_A2_TS8_DaPi_cell	Pak30	A2	PaKiT01	VSVG	2016-08-30 05:25:00	0.0001	2016-09-01 19:44:00	36	62.3167	4282	0.0464259
Pak30_A3_TS8_DaPi_cell	Pak30	A3	PaKiT01	VSVG	2016-08-30 05:25:00	0.0001	2016-09-01 19:44:00	36	62.3167	19529	0.211735
Pak30_B1_TS8_DaPi_cell	Pak30	B1	PaKiT01	VSVG	2016-08-30 05:25:00	0.001	2016-09-01 19:44:00	36	62.3167	15828	0.171609
Pak30_B2_TS8_DaPi_cell	Pak30	B2	PaKiT01	VSVG	2016-08-30 05:25:00	0.0001	2016-09-01 19:44:00	36	62.3167	13576	0.147192
Pak30_B3_TS8_DaPi_cell	Pak30	B3	PaKiT01	VSVG	2016-08-30 05:25:00	control	2016-09-01 19:44:00	36	62.3167	81907	0.888044
Pak31_A2_TS6_DaPi_cell	Pak31	A2	PaKiT01	MARV	2016-09-16 06:10:00	0.0001	2016-09-17 09:16:00	36	27.1	57447	0.622846
Pak31_B2_TS6_DaPi_cell	Pak31	B2	PaKiT01	MARV	2016-09-16 06:10:00	0.0001	2016-09-17 09:16:00	36	27.1	61324	0.664881
Pak31_B3_TS6_DaPi_cell	Pak31	B3	PaKiT01	MARV	2016-09-16 06:10:00	control	2016-09-17 09:16:00	36	27.1	83506	0.905381
Pak32_A2_TS13_DaPi_cell	Pak32	A2	PaKiT01	MARV	2016-09-16 06:10:00	0.0001	2016-09-20 17:28:00	36	107.3	29227	0.316882
Pak32_B2_TS13_DaPi_cell	Pak32	B2	PaKiT01	MARV	2016-09-16 06:10:00	0.0001	2016-09-20 17:28:00	36	107.3	40706	0.441339
Pak32_B3_TS13_DaPi_cell	Pak32	B3	PaKiT01	MARV	2016-09-16 06:10:00	control	2016-09-20 17:28:00	36	107.3	35686	0.386911
Pak33_A1_TS8_DaPi_cell	Pak33	A1	PaKiT01	MARV	2016-09-16 05:44:00	0.001	2016-09-18 08:20:00	36	50.6	34972	0.37917
Pak33_A2_TS8_DaPi_cell	Pak33	A2	PaKiT01	MARV	2016-09-16 06:10:00	0.0001	2016-09-18 08:20:00	36	50.1667	43213	0.46852
Pak33_A3_TS8_DaPi_cell	Pak33	A3	PaKiT01	MARV	2016-09-16 05:44:00	0.0001	2016-09-18 08:20:00	36	50.6	37504	0.406622
Pak33_B1_TS8_DaPi_cell	Pak33	B1	PaKiT01	MARV	2016-09-16 05:44:00	0.001	2016-09-18 08:20:00	36	50.6	31232	0.338621
Pak33_B2_TS8_DaPi_cell	Pak33	B2	PaKiT01	MARV	2016-09-16 06:10:00	0.0001	2016-09-18 08:20:00	36	50.1667	34789	0.377186
Pak33_B3_TS8_DaPi_cell	Pak33	B3	PaKiT01	MARV	2016-09-16 06:10:00	control	2016-09-18 08:20:00	36	50.1667	31511	0.341646
Pak34_A1_TS10_DaPi_cell	Pak34	A1	PaKiT01	MARV	2016-09-16 05:44:00	0.001	2016-09-19 09:46:00	36	76.0333	34958	0.379018
Pak34_A2_TS10_DaPi_cell	Pak34	A2	PaKiT01	MARV	2016-09-16 06:10:00	0.0001	2016-09-19 09:46:00	36	75.6	29446	0.319257
Pak34_A3_TS10_DaPi_cell	Pak34	A3	PaKiT01	MARV	2016-09-16 05:44:00	0.0001	2016-09-19 09:46:00	36	76.0333	36972	0.400854
Pak34_B1_TS10_DaPi_cell	Pak34	B1	PaKiT01	MARV	2016-09-16 05:44:00	0.001	2016-09-19 09:46:00	36	76.0333	39650	0.42989
Pak34_B2_TS10_DaPi_cell	Pak34	B2	PaKiT01	MARV	2016-09-16 06:10:00	0.0001	2016-09-19 09:46:00	36	75.6	39824	0.431776
Pak34_B3_TS10_DaPi_cell	Pak34	B3	PaKiT01	MARV	2016-09-16 06:10:00	control	2016-09-19 09:46:00	36	75.6	35715	0.387226
Pak35_A2_TS8_DaPi_cell	Pak35	A2	PaKiT01	MARV	2016-09-18 04:54:00	0.0001	2016-09-20 09:08:00	36	52.2333	51633	0.55981
Pak35_B2_TS8_DaPi_cell	Pak35	B2	PaKiT01	MARV	2016-09-18 04:54:00	0.0001	2016-09-20 09:08:00	36	52.2333	51870	0.56238
Pak35_B3_TS8_DaPi_cell	Pak35	B3	PaKiT01	MARV	2016-09-18 04:44:00	control	2016-09-20 09:08:00	36	52.4	42846	0.464541
Pak36_A2_TS18_DaPi_cell	Pak36	A2	PaKiT01	MARV	2016-09-18 04:54:00	0.0001	2016-09-25 19:29:00	36	182.583	30855	0.334533
Pak36_B2_TS18_DaPi_cell	Pak36	B2	PaKiT01	MARV	2016-09-18 04:54:00	0.0001	2016-09-25 19:29:00	36	182.583	29643	0.321393
Pak36_B3_TS18_DaPi_cell	Pak36	B3	PaKiT01	MARV	2016-09-18 04:54:00	control	2016-09-25 19:29:00	36	182.583	29783	0.32291
Pak37_A1_TS6_DaPi_cell	Pak37	A1	PaKiT01	MARV	2016-09-18 04:54:00	0.001	2016-09-19 09:50:00	36	28.9333	60166	0.652326
Pak37_A2_TS6_DaPi_cell	Pak37	A2	PaKiT01	MARV	2016-09-18 04:54:00	0.0001	2016-09-19 09:50:00	36	28.9333	79342	0.860234
Pak37_A3_TS6_DaPi_cell	Pak37	A3	PaKiT01	MARV	2016-09-18 04:54:00	0.0001	2016-09-19 09:50:00	36	28.9333	63431	0.687726
Pak37_B1_TS6_DaPi_cell	Pak37	B1	PaKiT01	MARV	2016-09-18 05:17:00	0.001	2016-09-19 09:50:00	36	28.55	51203	0.555148
Pak37_B2_TS6_DaPi_cell	Pak37	B2	PaKiT01	MARV	2016-09-18 04:54:00	0.0001	2016-09-19 09:50:00	36	28.9333	83339	0.90357
Pak37_B3_TS6_DaPi_cell	Pak37	B3	PaKiT01	MARV	2016-09-18 04:54:00	control	2016-09-19 09:50:00	36	28.9333	82544	0.894951
Pak38_A1_TS13_DaPi_cell	Pak38	A1	PaKiT01	MARV	2016-09-18 04:54:00	0.001	2016-09-22 19:52:00	36	110.967	43336	0.469854
Pak38_A2_TS13_DaPi_cell	Pak38	A2	PaKiT01	MARV	2016-09-18 04:54:00	0.0001	2016-09-22 19:52:00	36	110.967	48170	0.522264
Pak38_A3_TS13_DaPi_cell	Pak38	A3	PaKiT01	MARV	2016-09-18 04:54:00	0.0001	2016-09-22 19:52:00	36	110.967	44948	0.487331
Pak38_B1_TS13_DaPi_cell	Pak38	B1	PaKiT01	MARV	2016-09-18 04:54:00	0.001	2016-09-22 19:52:00	36	110.967	49392	0.535513
Pak38_B2_TS13_DaPi_cell	Pak38	B2	PaKiT01	MARV	2016-09-18 04:54:00	0.0001	2016-09-22 19:52:00	36	110.967	47686	0.517017
Pak38_B3_TS13_DaPi_cell	Pak38	B3	PaKiT01	MARV	2016-09-18 04:54:00	control	2016-09-22 19:52:00	36	110.967	49312	0.534646
Pak4_A1_TS20_DaPi_cell	Pak4	A1	PaKiT01	EBOV	2016-07-24 20:55:00	0.0001	2016-08-03 13:23:00	64	232.467	35859	0.388787
Pak4_A3_TS20_DaPi_cell	Pak4	A3	PaKiT01	EBOV	2016-07-24 20:55:00	0.001	2016-08-03 13:23:00	64	232.467	44326	0.480587
Pak4_B1_TS20_DaPi_cell	Pak4	B1	PaKiT01	EBOV	2016-07-24 20:55:00	0.0001	2016-08-03 13:23:00	64	232.467	37744	0.409224
Pak4_B3_TS20_DaPi_cell	Pak4	B3	PaKiT01	EBOV	2016-07-24 20:55:00	control	2016-08-03 13:23:00	64	232.467	47099	0.510652
Pak7_A1_TS9_DaPi_cell	Pak7	A1	PaKiT01	EBOV	2016-08-10 05:40:00	0.001	2016-08-11 20:47:00	36	39.1167	25493	0.276398
Pak7_A2_TS9_DaPi_cell	Pak7	A2	PaKiT01	EBOV	2016-08-10 05:40:00	0.0001	2016-08-11 20:47:00	36	39.1167	45665	0.495105
Pak7_A3_TS9_DaPi_cell	Pak7	A3	PaKiT01	EBOV	2016-08-10 05:40:00	0.001	2016-08-11 20:47:00	36	39.1167	16806	0.182212
Pak7_B1_TS9_DaPi_cell	Pak7	B1	PaKiT01	EBOV	2016-08-10 05:40:00	0.001	2016-08-11 20:47:00	36	39.1167	20163	0.218609
Pak7_B2_TS9_DaPi_cell	Pak7	B2	PaKiT01	EBOV	2016-08-10 05:40:00	0.0001	2016-08-11 20:47:00	36	39.1167	38493	0.417345
Pak8_A1_TS4_DaPi_cell	Pak8	A1	PaKiT01	EBOV	2016-08-10 05:40:00	0.001	2016-08-10 17:28:00	36	11.8	40558	0.439734
Pak8_A2_TS4_DaPi_cell	Pak8	A2	PaKiT01	EBOV	2016-08-10 05:40:00	0.0001	2016-08-10 17:28:00	36	11.8	51368	0.556937
Pak8_A3_TS4_DaPi_cell	Pak8	A3	PaKiT01	EBOV	2016-08-10 05:40:00	0.001	2016-08-10 17:28:00	36	11.8	42359	0.459261
Pak8_B1_TS4_DaPi_cell	Pak8	B1	PaKiT01	EBOV	2016-08-10 05:40:00	0.001	2016-08-10 17:28:00	36	11.8	48744	0.528488
Pak8_B2_TS4_DaPi_cell	Pak8	B2	PaKiT01	EBOV	2016-08-10 05:40:00	0.0001	2016-08-10 17:28:00	36	11.8	67051	0.726974
Pak8_B3_TS4_DaPi_cell	Pak8	B3	PaKiT01	EBOV	2016-08-10 05:40:00	control	2016-08-10 17:28:00	36	11.8	71200	0.771958
Pak9_A1_TS7_DaPi_cell	Pak9	A1	PaKiT01	EBOV	2016-08-10 05:40:00	0.001	2016-08-10 22:53:00	36	17.2167	66380	0.719699
Pak9_A2_TS7_DaPi_cell	Pak9	A2	PaKiT01	EBOV	2016-08-10 05:40:00	0.0001	2016-08-10 22:53:00	36	17.2167	68622	0.744007
Pak9_A3_TS7_DaPi_cell	Pak9	A3	PaKiT01	EBOV	2016-08-10 05:40:00	0.0001	2016-08-10 22:53:00	36	17.2167	66760	0.723819
Pak9_B1_TS7_DaPi_cell	Pak9	B1	PaKiT01	EBOV	2016-08-10 05:40:00	0.001	2016-08-10 22:53:00	36	17.2167	57799	0.626663
Pak9_B2_TS7_DaPi_cell	Pak9	B2	PaKiT01	EBOV	2016-08-10 05:40:00	0.0001	2016-08-10 22:53:00	36	17.2167	81744	0.886277
Pak9_B3_TS7_DaPi_cell	Pak9	B3	PaKiT01	EBOV	2016-08-10 05:40:00	control	2016-08-10 22:53:00	36	17.2167	73345	0.795214
Ron1_A1_TS5_DaPi_cell	Ron1	A1	RoNi/7.1	EBOV	2016-09-06 05:21:00	0.001	2016-09-07 07:08:00	36	25.7833	68516	0.832434
Ron1_A2_TS5_DaPi_cell	Ron1	A2	RoNi/7.1	EBOV	2016-09-06 05:21:00	0.0001	2016-09-07 07:08:00	36	25.7833	74955	0.910665
Ron1_A3_TS5_DaPi_cell	Ron1	A3	RoNi/7.1	EBOV	2016-09-06 05:21:00	0.001	2016-09-07 07:08:00	36	25.7833	74311	0.902841
Ron1_B1_TS5_DaPi_cell	Ron1	B1	RoNi/7.1	EBOV	2016-09-06 05:21:00	0.001	2016-09-07 07:08:00	36	25.7833	72792	0.884385
Ron1_B2_TS5_DaPi_cell	Ron1	B2	RoNi/7.1	EBOV	2016-09-06 05:21:00	0.0001	2016-09-07 07:08:00	36	25.7833	72544	0.881372
Ron1_B3_TS5_DaPi_cell	Ron1	B3	RoNi/7.1	EBOV	2016-09-06 05:21:00	control	2016-09-07 07:08:00	36	25.7833	74535	0.905562
Ron10_A1_TS9_DaPi_cell	Ron10	A1	RoNi/7.1	EBOV	2016-09-13 05:07:00	0.001	2016-09-15 19:18:00	36	62.1833	35545	0.431854
Ron10_A2_TS9_DaPi_cell	Ron10	A2	RoNi/7.1	EBOV	2016-09-13 05:07:00	0.0001	2016-09-15 19:18:00	36	62.1833	31620	0.384167
Ron10_A3_TS9_DaPi_cell	Ron10	A3	RoNi/7.1	EBOV	2016-09-13 05:07:00	0.001	2016-09-15 19:18:00	36	62.1833	42816	0.520192
Ron10_B1_TS9_DaPi_cell	Ron10	B1	RoNi/7.1	EBOV	2016-09-13 05:07:00	0.001	2016-09-15 19:18:00	36	62.1833	39473	0.479577
Ron10_B2_TS9_DaPi_cell	Ron10	B2	RoNi/7.1	EBOV	2016-09-13 05:07:00	0.0001	2016-09-15 19:18:00	36	62.1833	40903	0.49695
Ron10_B3_TS9_DaPi_cell	Ron10	B3	RoNi/7.1	EBOV	2016-09-13 05:07:00	control	2016-09-15 19:18:00	36	62.1833	54625	0.663666
Ron11_A1_TS11_DaPi_cell	Ron11	A1	RoNi/7.1	EBOV	2016-09-13 05:07:00	0.001	2016-09-16 21:37:00	36	88.5	46023	0.559156
Ron11_A2_TS11_DaPi_cell	Ron11	A2	RoNi/7.1	EBOV	2016-09-13 05:07:00	0.0001	2016-09-16 21:37:00	36	88.5	64571	0.784505
Ron11_A3_TS11_DaPi_cell	Ron11	A3	RoNi/7.1	EBOV	2016-09-13 05:07:00	0.0001	2016-09-16 21:37:00	36	88.5	59537	0.723344
Ron11_B1_TS11_DaPi_cell	Ron11	B1	RoNi/7.1	EBOV	2016-09-13 05:07:00	0.001	2016-09-16 21:37:00	36	88.5	43415	0.52747
Ron11_B2_TS11_DaPi_cell	Ron11	B2	RoNi/7.1	EBOV	2016-09-13 05:07:00	0.0001	2016-09-16 21:37:00	36	88.5	59337	0.720914
Ron11_B3_TS11_DaPi_cell	Ron11	B3	RoNi/7.1	EBOV	2016-09-13 05:07:00	control	2016-09-16 21:37:00	36	88.5	62763	0.762538
Ron12_A1_TS15_DaPi_cell	Ron12	A1	RoNi/7.1	EBOV	2016-09-13 05:07:00	0.001	2016-09-18 20:32:00	36	135.417	62024	0.75356
Ron12_A2_TS15_DaPi_cell	Ron12	A2	RoNi/7.1	EBOV	2016-09-13 05:07:00	0.0001	2016-09-18 20:32:00	36	135.417	74104	0.900326
Ron12_A3_TS15_DaPi_cell	Ron12	A3	RoNi/7.1	EBOV	2016-09-13 05:07:00	0.0001	2016-09-18 20:32:00	36	135.417	58298	0.708291
Ron12_B1_TS15_DaPi_cell	Ron12	B1	RoNi/7.1	EBOV	2016-09-13 05:07:00	0.001	2016-09-18 20:32:00	36	135.417	49035	0.59575
Ron12_B2_TS15_DaPi_cell	Ron12	B2	RoNi/7.1	EBOV	2016-09-13 05:07:00	0.0001	2016-09-18 20:32:00	36	135.417	59746	0.725883
Ron12_B3_TS15_DaPi_cell	Ron12	B3	RoNi/7.1	EBOV	2016-09-13 05:07:00	control	2016-09-18 20:32:00	36	135.417	67515	0.820273
Ron13_A1_TS5_DaPi_cell	Ron13	A1	RoNi/7.1	VSVG	2016-09-13 04:46:00	0.001	2016-09-13 22:42:00	36	17.9333	52755	0.640946
Ron13_A2_TS5_DaPi_cell	Ron13	A2	RoNi/7.1	VSVG	2016-09-13 04:46:00	0.0001	2016-09-13 22:42:00	36	17.9333	75118	0.912645
Ron13_A3_TS5_DaPi_cell	Ron13	A3	RoNi/7.1	VSVG	2016-09-13 04:46:00	0.001	2016-09-13 22:42:00	36	17.9333	56808	0.690188
Ron13_B1_TS5_DaPi_cell	Ron13	B1	RoNi/7.1	VSVG	2016-09-13 04:46:00	0.001	2016-09-13 22:42:00	36	17.9333	59258	0.719954
Ron13_B2_TS5_DaPi_cell	Ron13	B2	RoNi/7.1	VSVG	2016-09-13 04:46:00	0.0001	2016-09-13 22:42:00	36	17.9333	79169	0.961863
Ron13_B3_TS5_DaPi_cell	Ron13	B3	RoNi/7.1	VSVG	2016-09-13 04:46:00	control	2016-09-13 22:42:00	36	17.9333	80099	0.973162
Ron14_A1_TS7_DaPi_cell	Ron14	A1	RoNi/7.1	VSVG	2016-09-13 04:46:00	0.001	2016-09-14 18:27:00	36	37.6833	7632	0.0927249
Ron14_A2_TS7_DaPi_cell	Ron14	A2	RoNi/7.1	VSVG	2016-09-13 04:46:00	0.0001	2016-09-14 18:27:00	36	37.6833	18956	0.230306
Ron14_A3_TS7_DaPi_cell	Ron14	A3	RoNi/7.1	VSVG	2016-09-13 04:46:00	0.001	2016-09-14 18:27:00	36	37.6833	20905	0.253985
Ron14_B1_TS7_DaPi_cell	Ron14	B1	RoNi/7.1	VSVG	2016-09-13 04:46:00	0.001	2016-09-14 18:27:00	36	37.6833	22047	0.26786
Ron14_B2_TS7_DaPi_cell	Ron14	B2	RoNi/7.1	VSVG	2016-09-13 04:46:00	0.0001	2016-09-14 18:27:00	36	37.6833	25696	0.312193
Ron14_B3_TS7_DaPi_cell	Ron14	B3	RoNi/7.1	VSVG	2016-09-13 04:46:00	control	2016-09-14 18:27:00	36	37.6833	72514	0.881008
Ron15_A1_TS6_DaPi_cell	Ron15	A1	RoNi/7.1	VSVG	2016-09-13 04:46:00	0.001	2016-09-14 09:06:00	36	28.3333	26014	0.316057
Ron15_A2_TS6_DaPi_cell	Ron15	A2	RoNi/7.1	VSVG	2016-09-13 04:46:00	0.0001	2016-09-14 09:06:00	36	28.3333	18983	0.230634
Ron15_A3_TS6_DaPi_cell	Ron15	A3	RoNi/7.1	VSVG	2016-09-13 04:46:00	0.0001	2016-09-14 09:06:00	36	28.3333	32919	0.399949
Ron15_B1_TS6_DaPi_cell	Ron15	B1	RoNi/7.1	VSVG	2016-09-13 04:46:00	0.001	2016-09-14 09:06:00	36	28.3333	23858	0.289862
Ron15_B2_TS6_DaPi_cell	Ron15	B2	RoNi/7.1	VSVG	2016-09-13 04:46:00	0.0001	2016-09-14 09:06:00	36	28.3333	25421	0.308852
Ron15_B3_TS6_DaPi_cell	Ron15	B3	RoNi/7.1	VSVG	2016-09-13 04:46:00	control	2016-09-14 09:06:00	36	28.3333	79806	0.969602
Ron16_A1_TS8_DaPi_cell	Ron16	A1	RoNi/7.1	VSVG	2016-09-13 04:46:00	0.001	2016-09-15 09:23:00	36	52.6167	9174	0.111459
Ron16_A2_TS8_DaPi_cell	Ron16	A2	RoNi/7.1	VSVG	2016-09-13 04:46:00	0.0001	2016-09-15 09:23:00	36	52.6167	12813	0.155671
Ron16_A3_TS8_DaPi_cell	Ron16	A3	RoNi/7.1	VSVG	2016-09-13 04:46:00	0.0001	2016-09-15 09:23:00	36	52.6167	14262	0.173276
Ron16_B1_TS8_DaPi_cell	Ron16	B1	RoNi/7.1	VSVG	2016-09-13 04:46:00	0.001	2016-09-15 09:23:00	36	52.6167	9823	0.119344
Ron16_B2_TS8_DaPi_cell	Ron16	B2	RoNi/7.1	VSVG	2016-09-13 04:46:00	0.0001	2016-09-15 09:23:00	36	52.6167	6723	0.081681
Ron16_B3_TS8_DaPi_cell	Ron16	B3	RoNi/7.1	VSVG	2016-09-13 04:46:00	control	2016-09-15 09:23:00	36	52.6167	40639	0.493743
Ron17_A1_TS7_DaPi_cell	Ron17	A1	RoNi/7.1	MARV	2016-09-20 21:24:00	0.001	2016-09-22 09:07:00	36	35.7167	41681	0.506403
Ron17_A2_TS7_DaPi_cell	Ron17	A2	RoNi/7.1	MARV	2016-09-20 21:24:00	0.0001	2016-09-22 09:07:00	36	35.7167	45710	0.555353
Ron17_A3_TS7_DaPi_cell	Ron17	A3	RoNi/7.1	MARV	2016-09-20 21:24:00	0.001	2016-09-22 09:07:00	36	35.7167	47946	0.582519
Ron17_B1_TS7_DaPi_cell	Ron17	B1	RoNi/7.1	MARV	2016-09-20 21:24:00	0.001	2016-09-22 09:07:00	36	35.7167	34939	0.424491
Ron17_B2_TS7_DaPi_cell	Ron17	B2	RoNi/7.1	MARV	2016-09-20 21:24:00	0.0001	2016-09-22 09:07:00	36	35.7167	52353	0.636062
Ron17_B3_TS7_DaPi_cell	Ron17	B3	RoNi/7.1	MARV	2016-09-20 21:24:00	control	2016-09-22 09:07:00	36	35.7167	79799	0.969517
Ron18_A1_TS10_DaPi_cell	Ron18	A1	RoNi/7.1	MARV	2016-09-20 21:24:00	0.001	2016-09-24 11:04:00	36	85.6667	8814	0.107086
Ron18_A2_TS10_DaPi_cell	Ron18	A2	RoNi/7.1	MARV	2016-09-20 21:24:00	0.0001	2016-09-24 11:04:00	36	85.6667	7831	0.0951426
Ron18_A3_TS10_DaPi_cell	Ron18	A3	RoNi/7.1	MARV	2016-09-20 21:24:00	0.001	2016-09-24 11:04:00	36	85.6667	6043	0.0734194
Ron18_B1_TS10_DaPi_cell	Ron18	B1	RoNi/7.1	MARV	2016-09-20 21:24:00	0.001	2016-09-24 11:04:00	36	85.6667	7470	0.0907567
Ron18_B2_TS10_DaPi_cell	Ron18	B2	RoNi/7.1	MARV	2016-09-20 21:24:00	0.0001	2016-09-24 11:04:00	36	85.6667	6334	0.0769549
Ron18_B3_TS10_DaPi_cell	Ron18	B3	RoNi/7.1	MARV	2016-09-20 21:24:00	control	2016-09-24 11:04:00	36	85.6667	63880	0.776109
Ron19_A1_TS9_DaPi_cell	Ron19	A1	RoNi/7.1	MARV	2016-09-20 21:24:00	0.001	2016-09-23 05:33:00	36	56.15	16002	0.194416
Ron19_A2_TS9_DaPi_cell	Ron19	A2	RoNi/7.1	MARV	2016-09-20 21:24:00	0.0001	2016-09-23 05:33:00	36	56.15	29294	0.355907
Ron19_A3_TS9_DaPi_cell	Ron19	A3	RoNi/7.1	MARV	2016-09-20 21:24:00	0.0001	2016-09-23 05:33:00	36	56.15	43690	0.530811
Ron19_B1_TS9_DaPi_cell	Ron19	B1	RoNi/7.1	MARV	2016-09-20 21:24:00	0.001	2016-09-23 05:33:00	36	56.15	13919	0.169109
Ron19_B2_TS9_DaPi_cell	Ron19	B2	RoNi/7.1	MARV	2016-09-20 21:24:00	0.0001	2016-09-23 05:33:00	36	56.15	11923	0.144858
Ron19_B3_TS9_DaPi_cell	Ron19	B3	RoNi/7.1	MARV	2016-09-20 21:24:00	control	2016-09-23 05:33:00	36	56.15	61677	0.749344
Ron2_A1_TS8_DaPi_cell	Ron2	A1	RoNi/7.1	EBOV	2016-09-06 05:21:00	0.001	2016-09-12 15:40:00	36	154.317	82228	0.999028
Ron2_A2_TS8_DaPi_cell	Ron2	A2	RoNi/7.1	EBOV	2016-09-06 05:21:00	0.0001	2016-09-12 15:40:00	36	154.317	75351	0.915476
Ron2_A3_TS8_DaPi_cell	Ron2	A3	RoNi/7.1	EBOV	2016-09-06 05:21:00	0.001	2016-09-12 15:40:00	36	154.317	78988	0.959664
Ron2_B1_TS8_DaPi_cell	Ron2	B1	RoNi/7.1	EBOV	2016-09-06 05:21:00	0.001	2016-09-12 15:40:00	36	154.317	77540	0.942071
Ron2_B2_TS8_DaPi_cell	Ron2	B2	RoNi/7.1	EBOV	2016-09-06 05:21:00	0.0001	2016-09-12 15:40:00	36	154.317	63979	0.777312
Ron2_B3_TS8_DaPi_cell	Ron2	B3	RoNi/7.1	EBOV	2016-09-06 05:21:00	control	2016-09-12 15:40:00	36	154.317	79112	0.96117
Ron20_A1_TS11_DaPi_cell	Ron20	A1	RoNi/7.1	MARV	2016-09-20 21:24:00	0.001	2016-09-25 00:14:00	36	98.8333	3765	0.0457428
Ron20_A2_TS11_DaPi_cell	Ron20	A2	RoNi/7.1	MARV	2016-09-20 21:24:00	0.0001	2016-09-25 00:14:00	36	98.8333	10400	0.126355
Ron20_A3_TS11_DaPi_cell	Ron20	A3	RoNi/7.1	MARV	2016-09-20 21:24:00	0.0001	2016-09-25 00:14:00	36	98.8333	29077	0.353271
Ron20_B1_TS11_DaPi_cell	Ron20	B1	RoNi/7.1	MARV	2016-09-20 21:24:00	0.001	2016-09-25 00:14:00	36	98.8333	14204	0.172571
Ron20_B2_TS11_DaPi_cell	Ron20	B2	RoNi/7.1	MARV	2016-09-20 21:24:00	0.0001	2016-09-25 00:14:00	36	98.8333	10666	0.129586
Ron20_B3_TS11_DaPi_cell	Ron20	B3	RoNi/7.1	MARV	2016-09-20 21:24:00	control	2016-09-25 00:14:00	36	98.8333	71321	0.866514
Ron21_A1_TS6_DaPi_cell	Ron21	A1	RoNi/7.1	MARV	2016-09-24 07:51:00	0.001	2016-09-25 10:14:00	36	26.3833	52031	0.63215
Ron21_A2_TS6_DaPi_cell	Ron21	A2	RoNi/7.1	MARV	2016-09-24 07:51:00	0.0001	2016-09-25 10:14:00	36	26.3833	75501	0.917298
Ron21_A3_TS6_DaPi_cell	Ron21	A3	RoNi/7.1	MARV	2016-09-24 07:51:00	0.001	2016-09-25 10:14:00	36	26.3833	47948	0.582544
Ron21_B1_TS6_DaPi_cell	Ron21	B1	RoNi/7.1	MARV	2016-09-24 07:51:00	0.001	2016-09-25 10:14:00	36	26.3833	53500	0.649998
Ron21_B2_TS6_DaPi_cell	Ron21	B2	RoNi/7.1	MARV	2016-09-24 07:51:00	0.0001	2016-09-25 10:14:00	36	26.3833	65816	0.799631
Ron21_B3_TS6_DaPi_cell	Ron21	B3	RoNi/7.1	MARV	2016-09-24 07:51:00	control	2016-09-25 10:14:00	36	26.3833	66120	0.803324
Ron22_A1_TS8_DaPi_cell	Ron22	A1	RoNi/7.1	MARV	2016-09-24 07:51:00	0.001	2016-09-26 08:27:00	36	48.6	17683	0.214839
Ron22_A2_TS8_DaPi_cell	Ron22	A2	RoNi/7.1	MARV	2016-09-24 07:51:00	0.0001	2016-09-26 08:27:00	36	48.6	19514	0.237085
Ron22_A3_TS8_DaPi_cell	Ron22	A3	RoNi/7.1	MARV	2016-09-24 07:51:00	0.001	2016-09-26 08:27:00	36	48.6	8819	0.107146
Ron22_B1_TS8_DaPi_cell	Ron22	B1	RoNi/7.1	MARV	2016-09-24 07:51:00	0.001	2016-09-26 08:27:00	36	48.6	16770	0.203747
Ron22_B2_TS8_DaPi_cell	Ron22	B2	RoNi/7.1	MARV	2016-09-24 07:51:00	0.0001	2016-09-26 08:27:00	36	48.6	23634	0.287141
Ron22_B3_TS8_DaPi_cell	Ron22	B3	RoNi/7.1	MARV	2016-09-24 07:51:00	control	2016-09-26 08:27:00	36	48.6	82308	1
Ron23_A1_TS7_DaPi_cell	Ron23	A1	RoNi/7.1	MARV	2016-09-24 07:51:00	0.001	2016-09-25 19:36:00	36	35.75	43740	0.531419
Ron23_A2_TS7_DaPi_cell	Ron23	A2	RoNi/7.1	MARV	2016-09-24 07:51:00	0.0001	2016-09-25 19:36:00	36	35.75	51436	0.624921
Ron23_A3_TS7_DaPi_cell	Ron23	A3	RoNi/7.1	MARV	2016-09-24 07:51:00	0.0001	2016-09-25 19:36:00	36	35.75	48508	0.589347
Ron23_B1_TS7_DaPi_cell	Ron23	B1	RoNi/7.1	MARV	2016-09-24 07:51:00	0.001	2016-09-25 19:36:00	36	35.75	35407	0.430177
Ron23_B2_TS7_DaPi_cell	Ron23	B2	RoNi/7.1	MARV	2016-09-24 07:51:00	0.0001	2016-09-25 19:36:00	36	35.75	46341	0.563019
Ron23_B3_TS7_DaPi_cell	Ron23	B3	RoNi/7.1	MARV	2016-09-24 07:51:00	control	2016-09-25 19:36:00	36	35.75	61532	0.747582
Ron24_A1_TS9_DaPi_cell	Ron24	A1	RoNi/7.1	MARV	2016-09-24 07:51:00	0.001	2016-09-27 08:29:00	36	72.6333	10762	0.130753
Ron24_A2_TS9_DaPi_cell	Ron24	A2	RoNi/7.1	MARV	2016-09-24 07:51:00	0.0001	2016-09-27 08:29:00	36	72.6333	26169	0.31794
Ron24_A3_TS9_DaPi_cell	Ron24	A3	RoNi/7.1	MARV	2016-09-24 07:51:00	0.0001	2016-09-27 08:29:00	36	72.6333	39602	0.481144
Ron24_B1_TS9_DaPi_cell	Ron24	B1	RoNi/7.1	MARV	2016-09-24 07:51:00	0.001	2016-09-27 08:29:00	36	72.6333	7721	0.0938062
Ron24_B2_TS9_DaPi_cell	Ron24	B2	RoNi/7.1	MARV	2016-09-24 07:51:00	0.0001	2016-09-27 08:29:00	36	72.6333	24551	0.298282
Ron24_B3_TS9_DaPi_cell	Ron24	B3	RoNi/7.1	MARV	2016-09-24 07:51:00	control	2016-09-27 08:29:00	36	72.6333	59210	0.719371
Ron3_A1_TS6_DaPi_cell	Ron3	A1	RoNi/7.1	EBOV	2016-09-06 05:21:00	0.001	2016-09-07 18:04:00	36	36.7167	76953	0.934939
Ron3_A2_TS6_DaPi_cell	Ron3	A2	RoNi/7.1	EBOV	2016-09-06 05:21:00	0.0001	2016-09-07 18:04:00	36	36.7167	77295	0.939095
Ron3_A3_TS6_DaPi_cell	Ron3	A3	RoNi/7.1	EBOV	2016-09-06 05:21:00	0.0001	2016-09-07 18:04:00	36	36.7167	73658	0.894907
Ron3_B1_TS6_DaPi_cell	Ron3	B1	RoNi/7.1	EBOV	2016-09-06 05:21:00	0.001	2016-09-07 18:04:00	36	36.7167	68615	0.833637
Ron3_B2_TS6_DaPi_cell	Ron3	B2	RoNi/7.1	EBOV	2016-09-06 05:21:00	0.0001	2016-09-07 18:04:00	36	36.7167	68804	0.835933
Ron3_B3_TS6_DaPi_cell	Ron3	B3	RoNi/7.1	EBOV	2016-09-06 05:21:00	control	2016-09-07 18:04:00	36	36.7167	78092	0.948778
Ron4_A1_TS7_DaPi_cell	Ron4	A1	RoNi/7.1	EBOV	2016-09-06 05:21:00	0.001	2016-09-08 11:26:00	36	54.0833	32773	0.398175
Ron4_A2_TS7_DaPi_cell	Ron4	A2	RoNi/7.1	EBOV	2016-09-06 05:21:00	0.0001	2016-09-08 11:26:00	36	54.0833	32107	0.390084
Ron4_A3_TS7_DaPi_cell	Ron4	A3	RoNi/7.1	EBOV	2016-09-06 05:21:00	0.0001	2016-09-08 11:26:00	36	54.0833	35655	0.43319
Ron4_B1_TS7_DaPi_cell	Ron4	B1	RoNi/7.1	EBOV	2016-09-06 05:21:00	0.001	2016-09-08 11:26:00	36	54.0833	36232	0.4402
Ron4_B2_TS7_DaPi_cell	Ron4	B2	RoNi/7.1	EBOV	2016-09-06 05:21:00	0.0001	2016-09-08 11:26:00	36	54.0833	38797	0.471364
Ron4_B3_TS7_DaPi_cell	Ron4	B3	RoNi/7.1	EBOV	2016-09-06 05:21:00	control	2016-09-08 11:26:00	36	54.0833	43877	0.533083
Ron5_A1_TS5_DaPi_cell	Ron5	A1	RoNi/7.1	VSVG	2016-09-06 04:59:00	0.001	2016-09-07 07:12:00	36	26.2167	41224	0.50085
Ron5_A2_TS5_DaPi_cell	Ron5	A2	RoNi/7.1	VSVG	2016-09-06 04:59:00	0.0001	2016-09-07 07:12:00	36	26.2167	40131	0.487571
Ron5_A3_TS5_DaPi_cell	Ron5	A3	RoNi/7.1	VSVG	2016-09-06 04:59:00	0.001	2016-09-07 07:12:00	36	26.2167	20103	0.244241
Ron5_B1_TS5_DaPi_cell	Ron5	B1	RoNi/7.1	VSVG	2016-09-06 04:59:00	0.001	2016-09-07 07:12:00	36	26.2167	42094	0.511421
Ron5_B2_TS5_DaPi_cell	Ron5	B2	RoNi/7.1	VSVG	2016-09-06 04:59:00	0.0001	2016-09-07 07:12:00	36	26.2167	40046	0.486538
Ron5_B3_TS5_DaPi_cell	Ron5	B3	RoNi/7.1	VSVG	2016-09-06 04:59:00	control	2016-09-07 07:12:00	36	26.2167	63208	0.767945
Ron6_A1_TS7_DaPi_cell	Ron6	A1	RoNi/7.1	VSVG	2016-09-06 04:59:00	0.001	2016-09-08 08:14:00	36	51.25	5783	0.0702605
Ron6_A2_TS7_DaPi_cell	Ron6	A2	RoNi/7.1	VSVG	2016-09-06 04:59:00	0.0001	2016-09-08 08:14:00	36	51.25	8287	0.100683
Ron6_A3_TS7_DaPi_cell	Ron6	A3	RoNi/7.1	VSVG	2016-09-06 04:59:00	0.001	2016-09-08 08:14:00	36	51.25	11122	0.135127
Ron6_B1_TS7_DaPi_cell	Ron6	B1	RoNi/7.1	VSVG	2016-09-06 04:59:00	0.001	2016-09-08 08:14:00	36	51.25	9362	0.113744
Ron6_B2_TS7_DaPi_cell	Ron6	B2	RoNi/7.1	VSVG	2016-09-06 04:59:00	0.0001	2016-09-08 08:14:00	36	51.25	17050	0.207149
Ron6_B3_TS7_DaPi_cell	Ron6	B3	RoNi/7.1	VSVG	2016-09-06 04:59:00	control	2016-09-08 08:14:00	36	51.25	69938	0.849711
Ron7_A1_TS6_DaPi_cell	Ron7	A1	RoNi/7.1	VSVG	2016-09-06 04:59:00	0.001	2016-09-07 18:07:00	36	37.1333	10312	0.125286
Ron7_A2_TS6_DaPi_cell	Ron7	A2	RoNi/7.1	VSVG	2016-09-06 04:59:00	0.0001	2016-09-07 18:07:00	36	37.1333	15669	0.19037
Ron7_A3_TS6_DaPi_cell	Ron7	A3	RoNi/7.1	VSVG	2016-09-06 04:59:00	0.0001	2016-09-07 18:07:00	36	37.1333	31799	0.386342
Ron7_B1_TS6_DaPi_cell	Ron7	B1	RoNi/7.1	VSVG	2016-09-06 04:59:00	0.001	2016-09-07 18:07:00	36	37.1333	8336	0.101278
Ron7_B2_TS6_DaPi_cell	Ron7	B2	RoNi/7.1	VSVG	2016-09-06 04:59:00	0.0001	2016-09-07 18:07:00	36	37.1333	12138	0.14747
Ron7_B3_TS6_DaPi_cell	Ron7	B3	RoNi/7.1	VSVG	2016-09-06 04:59:00	control	2016-09-07 18:07:00	36	37.1333	67718	0.822739
Ron8_A2_TS7_DaPi_cell	Ron8	A2	RoNi/7.1	VSVG	2016-09-06 04:59:00	0.0001	2016-09-08 08:54:00	36	51.9167	14208	0.17262
Ron8_A3_TS7_DaPi_cell	Ron8	A3	RoNi/7.1	VSVG	2016-09-06 04:59:00	0.0001	2016-09-08 08:54:00	36	51.9167	16812	0.204257
Ron8_B2_TS7_DaPi_cell	Ron8	B2	RoNi/7.1	VSVG	2016-09-06 04:59:00	0.0001	2016-09-08 08:54:00	36	51.9167	16425	0.199555
Ron8_B3_TS7_DaPi_cell	Ron8	B3	RoNi/7.1	VSVG	2016-09-06 04:59:00	control	2016-09-08 08:54:00	36	51.9167	38019	0.461911
Ron9_A1_TS6_DaPi_cell	Ron9	A1	RoNi/7.1	EBOV	2016-09-13 05:07:00	0.001	2016-09-14 09:04:00	36	27.95	66488	0.807795
Ron9_A2_TS6_DaPi_cell	Ron9	A2	RoNi/7.1	EBOV	2016-09-13 05:07:00	0.0001	2016-09-14 09:04:00	36	27.95	78515	0.953917
Ron9_A3_TS6_DaPi_cell	Ron9	A3	RoNi/7.1	EBOV	2016-09-13 05:07:00	0.001	2016-09-14 09:04:00	36	27.95	62800	0.762988
Ron9_B1_TS6_DaPi_cell	Ron9	B1	RoNi/7.1	EBOV	2016-09-13 05:07:00	0.001	2016-09-14 09:04:00	36	27.95	69588	0.845459
Ron9_B2_TS6_DaPi_cell	Ron9	B2	RoNi/7.1	EBOV	2016-09-13 05:07:00	0.0001	2016-09-14 09:04:00	36	27.95	77235	0.938366
Ron9_B3_TS6_DaPi_cell	Ron9	B3	RoNi/7.1	EBOV	2016-09-13 05:07:00	control	2016-09-14 09:04:00	36	27.95	80345	0.976151
Ver10_A1_TS5_DaPi_cell	Ver10	A1	Vero	VSVG	2016-08-13 07:47:00	0.001	2016-08-14 04:12:00	36	20.4167	64690	0.623747
Ver10_A2_TS5_DaPi_cell	Ver10	A2	Vero	VSVG	2016-08-13 07:47:00	0.0001	2016-08-14 04:12:00	36	20.4167	65029	0.627015
Ver10_A3_TS5_DaPi_cell	Ver10	A3	Vero	VSVG	2016-08-13 07:47:00	0.001	2016-08-14 04:12:00	36	20.4167	56755	0.547237
Ver10_B1_TS5_DaPi_cell	Ver10	B1	Vero	VSVG	2016-08-13 07:47:00	0.001	2016-08-14 04:12:00	36	20.4167	57295	0.552443
Ver10_B2_TS5_DaPi_cell	Ver10	B2	Vero	VSVG	2016-08-13 07:47:00	0.0001	2016-08-14 04:12:00	36	20.4167	67121	0.647186
Ver10_B3_TS5_DaPi_cell	Ver10	B3	Vero	VSVG	2016-08-13 07:47:00	control	2016-08-14 04:12:00	36	20.4167	59631	0.574967
Ver11_A1_TS6_DaPi_cell	Ver11	A1	Vero	VSVG	2016-08-13 07:47:00	0.001	2016-08-14 06:28:00	36	22.6833	79639	0.767886
Ver11_A2_TS6_DaPi_cell	Ver11	A2	Vero	VSVG	2016-08-13 07:47:00	0.0001	2016-08-14 06:28:00	36	22.6833	77461	0.746886
Ver11_A3_TS6_DaPi_cell	Ver11	A3	Vero	VSVG	2016-08-13 07:47:00	0.001	2016-08-14 06:28:00	36	22.6833	82658	0.796996
Ver11_B1_TS6_DaPi_cell	Ver11	B1	Vero	VSVG	2016-08-13 07:47:00	0.001	2016-08-14 06:28:00	36	22.6833	72081	0.695011
Ver11_B2_TS6_DaPi_cell	Ver11	B2	Vero	VSVG	2016-08-13 07:47:00	0.0001	2016-08-14 06:28:00	36	22.6833	73014	0.704007
Ver11_B3_TS6_DaPi_cell	Ver11	B3	Vero	VSVG	2016-08-13 07:47:00	control	2016-08-14 06:28:00	36	22.6833	99442	0.958828
Ver12_A1_TS7_DaPi_cell	Ver12	A1	Vero	VSVG	2016-08-15 20:58:00	0.0001	2016-08-16 19:08:00	36	22.1667	85814	0.827426
Ver12_A3_TS7_DaPi_cell	Ver12	A3	Vero	VSVG	2016-08-15 20:58:00	0.0001	2016-08-16 19:08:00	36	22.1667	70916	0.683778
Ver12_B1_TS7_DaPi_cell	Ver12	B1	Vero	VSVG	2016-08-15 20:58:00	0.0001	2016-08-16 19:08:00	36	22.1667	82607	0.796504
Ver12_B3_TS7_DaPi_cell	Ver12	B3	Vero	VSVG	2016-08-15 20:58:00	control	2016-08-16 19:08:00	36	22.1667	88995	0.858097
Ver13_A1_TS8_DaPi_cell	Ver13	A1	Vero	VSVG	2016-08-15 20:58:00	0.0001	2016-08-17 07:35:00	36	34.6167	52686	0.508003
Ver13_B1_TS8_DaPi_cell	Ver13	B1	Vero	VSVG	2016-08-15 20:58:00	0.0001	2016-08-17 07:35:00	36	34.6167	51397	0.495574
Ver13_B3_TS8_DaPi_cell	Ver13	B3	Vero	VSVG	2016-08-15 20:58:00	control	2016-08-17 07:35:00	36	34.6167	103453	0.997503
Ver14_A1_TS6_DaPi_cell	Ver14	A1	Vero	EBOV	2016-08-18 05:06:00	0.001	2016-08-19 06:17:00	36	25.1833	71060	0.685167
Ver14_A2_TS6_DaPi_cell	Ver14	A2	Vero	EBOV	2016-08-18 05:06:00	0.0001	2016-08-19 06:17:00	36	25.1833	72210	0.696255
Ver14_A3_TS6_DaPi_cell	Ver14	A3	Vero	EBOV	2016-08-18 05:06:00	0.001	2016-08-19 06:17:00	36	25.1833	77687	0.749065
Ver14_B1_TS6_DaPi_cell	Ver14	B1	Vero	EBOV	2016-08-18 05:06:00	0.001	2016-08-19 06:17:00	36	25.1833	79265	0.76428
Ver14_B2_TS6_DaPi_cell	Ver14	B2	Vero	EBOV	2016-08-18 05:06:00	0.0001	2016-08-19 06:17:00	36	25.1833	82609	0.796523
Ver14_B3_TS6_DaPi_cell	Ver14	B3	Vero	EBOV	2016-08-18 05:06:00	control	2016-08-19 06:17:00	36	25.1833	83242	0.802627
Ver15_A1_TS8_DaPi_cell	Ver15	A1	Vero	EBOV	2016-08-18 05:06:00	0.001	2016-08-19 16:15:00	36	35.15	44716	0.431156
Ver15_A2_TS8_DaPi_cell	Ver15	A2	Vero	EBOV	2016-08-18 05:06:00	0.0001	2016-08-19 16:15:00	36	35.15	57796	0.557274
Ver15_A3_TS8_DaPi_cell	Ver15	A3	Vero	EBOV	2016-08-18 05:06:00	0.0001	2016-08-19 16:15:00	36	35.15	70262	0.677472
Ver15_B1_TS8_DaPi_cell	Ver15	B1	Vero	EBOV	2016-08-18 05:06:00	0.001	2016-08-19 16:15:00	36	35.15	42890	0.413549
Ver15_B2_TS8_DaPi_cell	Ver15	B2	Vero	EBOV	2016-08-18 05:06:00	0.0001	2016-08-19 16:15:00	36	35.15	65024	0.626967
Ver15_B3_TS8_DaPi_cell	Ver15	B3	Vero	EBOV	2016-08-18 05:06:00	control	2016-08-19 16:15:00	36	35.15	96430	0.929786
Ver16_A1_TS5_DaPi_cell	Ver16	A1	Vero	EBOV	2016-08-20 05:47:00	0.001	2016-08-21 08:35:00	36	26.8	60390	0.582286
Ver16_A2_TS5_DaPi_cell	Ver16	A2	Vero	EBOV	2016-08-20 05:47:00	0.0001	2016-08-21 08:35:00	36	26.8	48590	0.468509
Ver16_A3_TS5_DaPi_cell	Ver16	A3	Vero	EBOV	2016-08-20 05:47:00	0.001	2016-08-21 08:35:00	36	26.8	64018	0.617267
Ver16_B1_TS5_DaPi_cell	Ver16	B1	Vero	EBOV	2016-08-20 05:47:00	0.001	2016-08-21 08:35:00	36	26.8	75536	0.728325
Ver16_B2_TS5_DaPi_cell	Ver16	B2	Vero	EBOV	2016-08-20 05:47:00	0.0001	2016-08-21 08:35:00	36	26.8	67511	0.650947
Ver16_B3_TS5_DaPi_cell	Ver16	B3	Vero	EBOV	2016-08-20 05:47:00	control	2016-08-21 08:35:00	36	26.8	84371	0.813512
Ver17_A1_TS6_DaPi_cell	Ver17	A1	Vero	EBOV	2016-08-20 05:47:00	0.001	2016-08-21 15:04:00	36	33.2833	39467	0.380544
Ver17_A2_TS6_DaPi_cell	Ver17	A2	Vero	EBOV	2016-08-20 05:47:00	0.0001	2016-08-21 15:04:00	36	33.2833	65181	0.628481
Ver17_A3_TS6_DaPi_cell	Ver17	A3	Vero	EBOV	2016-08-20 05:47:00	0.0001	2016-08-21 15:04:00	36	33.2833	76048	0.733261
Ver17_B1_TS6_DaPi_cell	Ver17	B1	Vero	EBOV	2016-08-20 05:47:00	0.001	2016-08-21 15:04:00	36	33.2833	39430	0.380187
Ver17_B2_TS6_DaPi_cell	Ver17	B2	Vero	EBOV	2016-08-20 05:47:00	0.0001	2016-08-21 15:04:00	36	33.2833	61201	0.590105
Ver17_B3_TS6_DaPi_cell	Ver17	B3	Vero	EBOV	2016-08-20 05:47:00	control	2016-08-21 15:04:00	36	33.2833	96093	0.926537
Ver18_A1_TS7_DaPi_cell	Ver18	A1	Vero	VSVG	2016-08-25 21:09:00	0.0001	2016-08-27 09:52:00	36	36.7167	15990	0.154177
Ver18_A3_TS7_DaPi_cell	Ver18	A3	Vero	VSVG	2016-08-25 21:09:00	0.0001	2016-08-27 09:52:00	36	36.7167	18114	0.174657
Ver18_B1_TS7_DaPi_cell	Ver18	B1	Vero	VSVG	2016-08-25 21:09:00	0.0001	2016-08-27 09:52:00	36	36.7167	17158	0.165439
Ver18_B3_TS7_DaPi_cell	Ver18	B3	Vero	VSVG	2016-08-25 21:09:00	control	2016-08-27 09:52:00	36	36.7167	80401	0.775233
Ver19_A1_TS9_DaPi_cell	Ver19	A1	Vero	EBOV	2016-08-28 04:39:00	0.001	2016-08-30 21:29:00	36	64.8333	15006	0.144689
Ver19_A2_TS9_DaPi_cell	Ver19	A2	Vero	EBOV	2016-08-28 04:39:00	0.0001	2016-08-30 21:29:00	36	64.8333	15160	0.146174
Ver19_A3_TS9_DaPi_cell	Ver19	A3	Vero	EBOV	2016-08-28 04:39:00	0.001	2016-08-30 21:29:00	36	64.8333	12724	0.122686
Ver19_B1_TS9_DaPi_cell	Ver19	B1	Vero	EBOV	2016-08-28 04:39:00	0.001	2016-08-30 21:29:00	36	64.8333	16669	0.160724
Ver19_B2_TS9_DaPi_cell	Ver19	B2	Vero	EBOV	2016-08-28 04:39:00	0.0001	2016-08-30 21:29:00	36	64.8333	23742	0.228922
Ver19_B3_TS9_DaPi_cell	Ver19	B3	Vero	EBOV	2016-08-28 04:39:00	control	2016-08-30 21:29:00	36	64.8333	72492	0.698974
Ver2_A2_TS6_DaPi_cell	Ver2	A3	Vero	EBOV	2016-07-24 21:10:00	0.001	2016-07-26 18:23:00	64	45.2167	36484	0.351782
Ver2_B2_TS6_DaPi_cell	Ver2	B1	Vero	EBOV	2016-07-24 21:10:00	0.001	2016-07-26 18:35:00	64	45.4167	37760	0.364085
Ver2_B3_TS6_DaPi_cell	Ver2	B3	Vero	EBOV	2016-07-24 21:10:00	control	2016-07-26 18:33:00	64	45.3833	88710	0.855349
Ver20_A1_TS6_DaPi_cell	Ver20	A1	Vero	VSVG	2016-08-30 04:39:00	0.001	2016-08-31 18:25:00	36	37.7667	16443	0.158545
Ver20_A2_TS6_DaPi_cell	Ver20	A2	Vero	VSVG	2016-08-30 04:39:00	0.0001	2016-08-31 18:25:00	36	37.7667	11037	0.10642
Ver20_A3_TS6_DaPi_cell	Ver20	A3	Vero	VSVG	2016-08-30 04:39:00	0.001	2016-08-31 18:25:00	36	37.7667	13533	0.130486
Ver20_B1_TS6_DaPi_cell	Ver20	B1	Vero	VSVG	2016-08-30 04:39:00	0.001	2016-08-31 18:25:00	36	37.7667	17915	0.172738
Ver20_B2_TS6_DaPi_cell	Ver20	B2	Vero	VSVG	2016-08-30 04:39:00	0.0001	2016-08-31 18:25:00	36	37.7667	12735	0.122792
Ver20_B3_TS6_DaPi_cell	Ver20	B3	Vero	VSVG	2016-08-30 04:39:00	control	2016-08-31 18:25:00	36	37.7667	88336	0.851743
Ver21_A1_TS8_DaPi_cell	Ver21	A1	Vero	EBOV	2016-09-01 22:23:00	0.001	2016-09-04 09:25:00	36	59.0333	16064	0.15489
Ver21_A2_TS8_DaPi_cell	Ver21	A2	Vero	EBOV	2016-09-01 22:23:00	0.0001	2016-09-04 09:25:00	36	59.0333	7090	0.0683624
Ver21_A3_TS8_DaPi_cell	Ver21	A3	Vero	EBOV	2016-09-01 22:23:00	0.0001	2016-09-04 09:25:00	36	59.0333	23260	0.224275
Ver21_B1_TS8_DaPi_cell	Ver21	B1	Vero	EBOV	2016-09-01 22:23:00	0.001	2016-09-04 09:25:00	36	59.0333	15421	0.148691
Ver21_B2_TS8_DaPi_cell	Ver21	B2	Vero	EBOV	2016-09-01 22:23:00	0.0001	2016-09-04 09:25:00	36	59.0333	18872	0.181965
Ver21_B3_TS8_DaPi_cell	Ver21	B3	Vero	EBOV	2016-09-01 22:23:00	control	2016-09-04 09:25:00	36	59.0333	35742	0.344627
Ver22_A1_TS6_DaPi_cell	Ver22	A1	Vero	VSVG	2016-09-01 22:27:00	0.001	2016-09-03 10:52:00	36	36.4167	35699	0.344213
Ver22_A2_TS6_DaPi_cell	Ver22	A2	Vero	VSVG	2016-09-01 22:27:00	0.0001	2016-09-03 10:52:00	36	36.4167	40561	0.391093
Ver22_A3_TS6_DaPi_cell	Ver22	A3	Vero	VSVG	2016-09-01 22:27:00	0.0001	2016-09-03 10:52:00	36	36.4167	42004	0.405006
Ver22_B1_TS6_DaPi_cell	Ver22	B1	Vero	VSVG	2016-09-01 22:27:00	0.001	2016-09-03 10:52:00	36	36.4167	24866	0.23976
Ver22_B2_TS6_DaPi_cell	Ver22	B2	Vero	VSVG	2016-09-01 22:27:00	0.0001	2016-09-03 10:52:00	36	36.4167	28331	0.27317
Ver22_B3_TS6_DaPi_cell	Ver22	B3	Vero	VSVG	2016-09-01 22:27:00	control	2016-09-03 10:52:00	36	36.4167	84538	0.815123
Ver23_A1_TS7_DaPi_cell	Ver23	A1	Vero	VSVG	2016-09-04 05:12:00	0.001	2016-09-06 08:04:00	36	50.8667	28870	0.278367
Ver23_A2_TS7_DaPi_cell	Ver23	A2	Vero	VSVG	2016-09-04 05:12:00	0.0001	2016-09-06 08:04:00	36	50.8667	46406	0.447451
Ver23_A3_TS7_DaPi_cell	Ver23	A3	Vero	VSVG	2016-09-04 05:12:00	0.0001	2016-09-06 08:04:00	36	50.8667	33254	0.320638
Ver23_B1_TS7_DaPi_cell	Ver23	B1	Vero	VSVG	2016-09-04 05:12:00	0.001	2016-09-06 08:04:00	36	50.8667	29683	0.286206
Ver23_B2_TS7_DaPi_cell	Ver23	B2	Vero	VSVG	2016-09-04 05:12:00	0.0001	2016-09-06 08:04:00	36	50.8667	40919	0.394545
Ver23_B3_TS7_DaPi_cell	Ver23	B3	Vero	VSVG	2016-09-04 05:12:00	control	2016-09-06 08:04:00	36	50.8667	96577	0.931204
Ver24_A1_TS9_DaPi_cell	Ver24	A1	Vero	EBOV	2016-09-04 05:12:00	0.001	2016-09-07 08:59:00	36	75.7833	7233	0.0697412
Ver24_A2_TS9_DaPi_cell	Ver24	A2	Vero	EBOV	2016-09-04 05:12:00	0.0001	2016-09-07 08:59:00	36	75.7833	6097	0.0587878
Ver24_A3_TS9_DaPi_cell	Ver24	A3	Vero	EBOV	2016-09-04 05:12:00	0.0001	2016-09-07 08:59:00	36	75.7833	6868	0.0662218
Ver24_B1_TS9_DaPi_cell	Ver24	B1	Vero	EBOV	2016-09-04 05:12:00	0.001	2016-09-07 08:59:00	36	75.7833	11057	0.106613
Ver24_B2_TS9_DaPi_cell	Ver24	B2	Vero	EBOV	2016-09-04 05:12:00	0.0001	2016-09-07 08:59:00	36	75.7833	6966	0.0671668
Ver24_B3_TS9_DaPi_cell	Ver24	B3	Vero	EBOV	2016-09-04 05:12:00	control	2016-09-07 08:59:00	36	75.7833	50945	0.491216
Ver25_A1_TS7_DaPi_cell	Ver25	A1	Vero	EBOV	2016-09-06 04:35:00	0.001	2016-09-08 08:22:00	36	51.7833	28669	0.276429
Ver25_A2_TS7_DaPi_cell	Ver25	A2	Vero	EBOV	2016-09-06 04:35:00	0.0001	2016-09-08 08:22:00	36	51.7833	44571	0.429757
Ver25_A3_TS7_DaPi_cell	Ver25	A3	Vero	EBOV	2016-09-06 04:35:00	0.0001	2016-09-08 08:22:00	36	51.7833	35578	0.343046
Ver25_B1_TS7_DaPi_cell	Ver25	B1	Vero	EBOV	2016-09-06 04:35:00	0.001	2016-09-08 08:22:00	36	51.7833	21568	0.207961
Ver25_B2_TS7_DaPi_cell	Ver25	B2	Vero	EBOV	2016-09-06 04:35:00	0.0001	2016-09-08 08:22:00	36	51.7833	39823	0.383977
Ver25_B3_TS7_DaPi_cell	Ver25	B3	Vero	EBOV	2016-09-06 04:35:00	control	2016-09-08 08:22:00	36	51.7833	99186	0.95636
Ver26_A1_TS7_DaPi_cell	Ver26	A1	Vero	VSVG	2016-09-06 04:35:00	0.001	2016-09-08 08:52:00	36	52.2833	4346	0.0419045
Ver26_A2_TS7_DaPi_cell	Ver26	A2	Vero	VSVG	2016-09-06 04:35:00	0.0001	2016-09-08 08:52:00	36	52.2833	10567	0.101888
Ver26_A3_TS7_DaPi_cell	Ver26	A3	Vero	VSVG	2016-09-06 04:35:00	0.0001	2016-09-08 08:52:00	36	52.2833	18941	0.182631
Ver26_B1_TS7_DaPi_cell	Ver26	B1	Vero	VSVG	2016-09-06 04:35:00	0.001	2016-09-08 08:52:00	36	52.2833	12473	0.120266
Ver26_B2_TS7_DaPi_cell	Ver26	B2	Vero	VSVG	2016-09-06 04:35:00	0.0001	2016-09-08 08:52:00	36	52.2833	10265	0.098976
Ver26_B3_TS7_DaPi_cell	Ver26	B3	Vero	VSVG	2016-09-06 04:35:00	control	2016-09-08 08:52:00	36	52.2833	40531	0.390803
Ver27_A1_TS9_DaPi_cell	Ver27	A1	Vero	EBOV	2016-09-13 04:27:00	0.001	2016-09-15 19:29:00	36	63.0333	22183	0.21389
Ver27_A2_TS9_DaPi_cell	Ver27	A2	Vero	EBOV	2016-09-13 04:27:00	0.0001	2016-09-15 19:29:00	36	63.0333	28189	0.271801
Ver27_A3_TS9_DaPi_cell	Ver27	A3	Vero	EBOV	2016-09-13 04:27:00	0.0001	2016-09-15 19:29:00	36	63.0333	19218	0.185302
Ver27_B1_TS9_DaPi_cell	Ver27	B1	Vero	EBOV	2016-09-13 04:27:00	0.001	2016-09-15 19:29:00	36	63.0333	21080	0.203255
Ver27_B2_TS9_DaPi_cell	Ver27	B2	Vero	EBOV	2016-09-13 04:27:00	0.0001	2016-09-15 19:29:00	36	63.0333	6014	0.0579875
Ver27_B3_TS9_DaPi_cell	Ver27	B3	Vero	EBOV	2016-09-13 04:27:00	control	2016-09-15 19:29:00	36	63.0333	63472	0.612002
Ver28_A1_TS8_DaPi_cell	Ver28	A1	Vero	VSVG	2016-09-13 04:27:00	0.001	2016-09-15 09:29:00	36	53.0333	10934	0.105427
Ver28_A2_TS8_DaPi_cell	Ver28	A2	Vero	VSVG	2016-09-13 04:27:00	0.0001	2016-09-15 09:29:00	36	53.0333	25017	0.241216
Ver28_A3_TS8_DaPi_cell	Ver28	A3	Vero	VSVG	2016-09-13 04:27:00	0.0001	2016-09-15 09:29:00	36	53.0333	18164	0.175139
Ver28_B1_TS8_DaPi_cell	Ver28	B1	Vero	VSVG	2016-09-13 04:27:00	0.001	2016-09-15 09:29:00	36	53.0333	7046	0.0679381
Ver28_B2_TS8_DaPi_cell	Ver28	B2	Vero	VSVG	2016-09-13 04:27:00	0.0001	2016-09-15 09:29:00	36	53.0333	15090	0.145499
Ver28_B3_TS8_DaPi_cell	Ver28	B3	Vero	VSVG	2016-09-13 04:27:00	control	2016-09-15 09:29:00	36	53.0333	81325	0.784143
Ver29_A1_TS7_DaPi_cell	Ver29	A1	Vero	MARV	2016-09-16 04:58:00	0.001	2016-09-17 17:58:00	36	37	51660	0.49811
Ver29_A2_TS7_DaPi_cell	Ver29	A2	Vero	MARV	2016-09-16 04:58:00	0.0001	2016-09-17 17:58:00	36	37	40016	0.385838
Ver29_B1_TS7_DaPi_cell	Ver29	B1	Vero	MARV	2016-09-16 04:58:00	0.001	2016-09-17 17:58:00	36	37	32134	0.309839
Ver29_B2_TS7_DaPi_cell	Ver29	B2	Vero	MARV	2016-09-16 04:58:00	0.0001	2016-09-17 17:58:00	36	37	45093	0.434791
Ver29_B3_TS7_DaPi_cell	Ver29	B3	Vero	MARV	2016-09-16 04:58:00	control	2016-09-17 17:58:00	36	37	100326	0.967352
Ver3_A2_TS6_DaPi_cell	Ver3	A2	Vero	EBOV	2016-07-24 21:10:00	0.001	2016-07-26 19:06:00	64	45.9333	28323	0.273093
Ver3_B2_TS6_DaPi_cell	Ver3	B2	Vero	EBOV	2016-07-24 21:10:00	0.001	2016-07-26 19:12:00	64	46.0333	32231	0.310774
Ver3_B3_TS6_DaPi_cell	Ver3	B3	Vero	EBOV	2016-07-24 21:10:00	control	2016-07-26 19:20:00	64	46.1667	87424	0.84295
Ver30_A1_TS8_DaPi_cell	Ver30	A1	Vero	MARV	2016-09-16 04:58:00	0.001	2016-09-18 08:31:00	36	51.55	63497	0.612244
Ver30_A2_TS8_DaPi_cell	Ver30	A2	Vero	MARV	2016-09-16 04:58:00	0.0001	2016-09-18 08:31:00	36	51.55	73123	0.705058
Ver30_B1_TS8_DaPi_cell	Ver30	B1	Vero	MARV	2016-09-16 04:58:00	0.001	2016-09-18 08:31:00	36	51.55	44251	0.426672
Ver30_B2_TS8_DaPi_cell	Ver30	B2	Vero	MARV	2016-09-16 04:58:00	0.0001	2016-09-18 08:31:00	36	51.55	75161	0.724709
Ver30_B3_TS8_DaPi_cell	Ver30	B3	Vero	MARV	2016-09-16 04:58:00	control	2016-09-18 08:31:00	36	51.55	88438	0.852727
Ver31_A1_TS9_DaPi_cell	Ver31	A1	Vero	MARV	2016-09-18 04:28:00	0.001	2016-09-20 17:42:00	36	61.2333	3653	0.0352225
Ver31_A2_TS9_DaPi_cell	Ver31	A2	Vero	MARV	2016-09-18 04:28:00	0.0001	2016-09-20 17:42:00	36	61.2333	4212	0.0406125
Ver31_B1_TS9_DaPi_cell	Ver31	B1	Vero	MARV	2016-09-18 04:28:00	0.001	2016-09-20 17:42:00	36	61.2333	4726	0.0455685
Ver31_B2_TS9_DaPi_cell	Ver31	B2	Vero	MARV	2016-09-18 04:28:00	0.0001	2016-09-20 17:42:00	36	61.2333	5473	0.0527711
Ver31_B3_TS9_DaPi_cell	Ver31	B3	Vero	MARV	2016-09-18 04:28:00	control	2016-09-20 17:42:00	36	61.2333	94220	0.908477
Ver32_A1_TS9_DaPi_cell	Ver32	A1	Vero	MARV	2016-09-18 04:28:00	0.001	2016-09-20 18:07:00	36	61.65	11414	0.110055
Ver32_A2_TS9_DaPi_cell	Ver32	A2	Vero	MARV	2016-09-18 04:28:00	0.0001	2016-09-20 18:07:00	36	61.65	6399	0.0616997
Ver32_B1_TS9_DaPi_cell	Ver32	B1	Vero	MARV	2016-09-18 04:28:00	0.001	2016-09-20 18:07:00	36	61.65	14230	0.137207
Ver32_B2_TS9_DaPi_cell	Ver32	B2	Vero	MARV	2016-09-18 04:28:00	0.0001	2016-09-20 18:07:00	36	61.65	13074	0.126061
Ver33_A1_TS8_DaPi_cell	Ver33	A1	Vero	MARV	2016-09-20 21:03:00	0.001	2016-09-22 20:04:00	36	47.0167	74337	0.716764
Ver33_A2_TS8_DaPi_cell	Ver33	A2	Vero	MARV	2016-09-20 21:03:00	0.0001	2016-09-22 20:04:00	36	47.0167	72169	0.69586
Ver33_A3_TS8_DaPi_cell	Ver33	A3	Vero	MARV	2016-09-20 21:03:00	0.001	2016-09-22 20:04:00	36	47.0167	65069	0.627401
Ver33_B1_TS8_DaPi_cell	Ver33	B1	Vero	MARV	2016-09-20 21:03:00	0.001	2016-09-22 20:04:00	36	47.0167	71374	0.688194
Ver33_B2_TS8_DaPi_cell	Ver33	B2	Vero	MARV	2016-09-20 21:03:00	0.0001	2016-09-22 20:04:00	36	47.0167	66440	0.64062
Ver33_B3_TS8_DaPi_cell	Ver33	B3	Vero	MARV	2016-09-20 21:03:00	control	2016-09-22 20:04:00	36	47.0167	102540	0.988699
Ver34_A1_TS10_DaPi_cell	Ver34	A1	Vero	MARV	2016-09-20 21:03:00	0.001	2016-09-24 11:15:00	36	86.2	28030	0.270268
Ver34_A2_TS10_DaPi_cell	Ver34	A2	Vero	MARV	2016-09-20 21:03:00	0.0001	2016-09-24 11:15:00	36	86.2	28227	0.272167
Ver34_A3_TS10_DaPi_cell	Ver34	A3	Vero	MARV	2016-09-20 21:03:00	0.0001	2016-09-24 11:15:00	36	86.2	37950	0.365917
Ver34_B1_TS10_DaPi_cell	Ver34	B1	Vero	MARV	2016-09-20 21:03:00	0.001	2016-09-24 11:15:00	36	86.2	27013	0.260462
Ver34_B2_TS10_DaPi_cell	Ver34	B2	Vero	MARV	2016-09-20 21:03:00	0.0001	2016-09-24 11:15:00	36	86.2	26448	0.255014
Ver34_B3_TS10_DaPi_cell	Ver34	B3	Vero	MARV	2016-09-20 21:03:00	control	2016-09-24 11:15:00	36	86.2	86755	0.836499
Ver35_A1_TS5_DaPi_cell	Ver35	A1	Vero	MARV	2016-09-24 07:31:00	0.001	2016-09-25 10:07:00	36	26.6	67184	0.647794
Ver35_A2_TS5_DaPi_cell	Ver35	A2	Vero	MARV	2016-09-24 07:31:00	0.0001	2016-09-25 10:07:00	36	26.6	65079	0.627497
Ver35_A3_TS5_DaPi_cell	Ver35	A3	Vero	MARV	2016-09-24 07:31:00	0.001	2016-09-25 10:07:00	36	26.6	61571	0.593673
Ver35_B1_TS5_DaPi_cell	Ver35	B1	Vero	MARV	2016-09-24 07:31:00	0.001	2016-09-25 10:07:00	36	26.6	63912	0.616245
Ver35_B2_TS5_DaPi_cell	Ver35	B2	Vero	MARV	2016-09-24 07:31:00	0.0001	2016-09-25 10:07:00	36	26.6	69892	0.673905
Ver35_B3_TS5_DaPi_cell	Ver35	B3	Vero	MARV	2016-09-24 07:31:00	control	2016-09-25 10:07:00	36	26.6	64994	0.626678
Ver36_A1_TS7_DaPi_cell	Ver36	A1	Vero	MARV	2016-09-24 07:31:00	0.001	2016-09-26 08:19:00	36	48.8	29226	0.2818
Ver36_A2_TS7_DaPi_cell	Ver36	A2	Vero	MARV	2016-09-24 07:31:00	0.0001	2016-09-26 08:19:00	36	48.8	41687	0.40195
Ver36_A3_TS7_DaPi_cell	Ver36	A3	Vero	MARV	2016-09-24 07:31:00	0.0001	2016-09-26 08:19:00	36	48.8	64199	0.619012
Ver36_B1_TS7_DaPi_cell	Ver36	B1	Vero	MARV	2016-09-24 07:31:00	0.001	2016-09-26 08:19:00	36	48.8	31823	0.30684
Ver36_B2_TS7_DaPi_cell	Ver36	B2	Vero	MARV	2016-09-24 07:31:00	0.0001	2016-09-26 08:19:00	36	48.8	31710	0.305751
Ver36_B3_TS7_DaPi_cell	Ver36	B3	Vero	MARV	2016-09-24 07:31:00	control	2016-09-26 08:19:00	36	48.8	70539	0.680143
Ver4_A1_TS8_DaPi_cell	Ver4	A1	Vero	EBOV	2016-07-29 18:30:00	0.001	2016-07-31 00:10:00	64	29.6667	62551	0.603122
Ver4_A2_TS8_DaPi_cell	Ver4	A2	Vero	EBOV	2016-07-29 18:30:00	0.0001	2016-07-31 00:10:00	64	29.6667	70772	0.68239
Ver4_B1_TS8_DaPi_cell	Ver4	B1	Vero	EBOV	2016-07-29 18:30:00	0.001	2016-07-31 00:10:00	64	29.6667	60739	0.585651
Ver4_B2_TS8_DaPi_cell	Ver4	B2	Vero	EBOV	2016-07-29 18:30:00	0.0001	2016-07-31 00:10:00	64	29.6667	72107	0.695262
Ver4_B3_TS8_DaPi_cell	Ver4	B3	Vero	EBOV	2016-07-29 18:30:00	control	2016-07-31 00:10:00	64	29.6667	83468	0.804806
Ver6_A1_TS10_DaPi_cell	Ver6	A1	Vero	EBOV	2016-08-01 17:18:00	0.001	2016-08-03 13:14:00	64	43.9333	11806	0.113834
Ver6_A2_TS10_DaPi_cell	Ver6	A2	Vero	EBOV	2016-08-01 17:18:00	0.0001	2016-08-03 13:14:00	64	43.9333	27099	0.261291
Ver6_B1_TS10_DaPi_cell	Ver6	B1	Vero	EBOV	2016-08-01 17:18:00	0.001	2016-08-03 13:14:00	64	43.9333	16417	0.158294
Ver6_B2_TS10_DaPi_cell	Ver6	B2	Vero	EBOV	2016-08-01 17:18:00	0.0001	2016-08-03 13:14:00	64	43.9333	27672	0.266816
Ver6_B3_TS10_DaPi_cell	Ver6	B3	Vero	EBOV	2016-08-01 17:18:00	control	2016-08-03 13:14:00	64	43.9333	88134	0.849796
Ver8_A1_TS8_DaPi_cell	Ver8	A1	Vero	EBOV	2016-08-10 05:40:00	0.001	2016-08-11 08:49:00	36	27.15	74639	0.719676
Ver8_A2_TS8_DaPi_cell	Ver8	A2	Vero	EBOV	2016-08-10 05:40:00	0.0001	2016-08-11 08:49:00	36	27.15	79736	0.768821
Ver8_A3_TS8_DaPi_cell	Ver8	A3	Vero	EBOV	2016-08-10 05:40:00	0.001	2016-08-11 08:49:00	36	27.15	72873	0.702648
Ver8_B1_TS8_DaPi_cell	Ver8	B1	Vero	EBOV	2016-08-10 05:40:00	0.001	2016-08-11 08:49:00	36	27.15	69493	0.670057
Ver8_B2_TS8_DaPi_cell	Ver8	B2	Vero	EBOV	2016-08-10 05:40:00	0.0001	2016-08-11 08:49:00	36	27.15	82627	0.796697
Ver8_B3_TS8_DaPi_cell	Ver8	B3	Vero	EBOV	2016-08-10 05:40:00	control	2016-08-11 08:49:00	36	27.15	96559	0.93103
Ver9_A1_TS9_DaPi_cell	Ver9	A1	Vero	EBOV	2016-08-10 05:40:00	0.001	2016-08-11 19:54:00	36	38.2333	14314	0.138017
Ver9_A2_TS9_DaPi_cell	Ver9	A2	Vero	EBOV	2016-08-10 05:40:00	0.0001	2016-08-11 19:54:00	36	38.2333	24607	0.237263
Ver9_A3_TS9_DaPi_cell	Ver9	A3	Vero	EBOV	2016-08-10 05:40:00	0.0001	2016-08-11 19:54:00	36	38.2333	38645	0.372618
Ver9_B1_TS9_DaPi_cell	Ver9	B1	Vero	EBOV	2016-08-10 05:40:00	0.001	2016-08-11 19:54:00	36	38.2333	15672	0.151111
Ver9_B2_TS9_DaPi_cell	Ver9	B2	Vero	EBOV	2016-08-10 05:40:00	0.0001	2016-08-11 19:54:00	36	38.2333	22033	0.212444
Ver9_B3_TS9_DaPi_cell	Ver9	B3	Vero	EBOV	2016-08-10 05:40:00	control	2016-08-11 19:54:00	36	38.2333	103712	1

## Sheet: C-Infectious-Fit
time_elapsed	ID	proportion	se_prop	lwr_prop	upr_prop	cell_type	MOI	virus
0	Ver10_A2	0	7.66e-05	0	0	Vero	0.0001	VSVG
1	Ver10_A2	0	6.83e-05	0	0	Vero	0.0001	VSVG
2	Ver10_A2	0	6e-05	0	0	Vero	0.0001	VSVG
3	Ver10_A2	0	5.18e-05	0	0	Vero	0.0001	VSVG
4	Ver10_A2	0	4.36e-05	0	0	Vero	0.0001	VSVG
5	Ver10_A2	0	3.55e-05	0	0	Vero	0.0001	VSVG
6	Ver10_A2	2.6e-06	2.75e-05	0	5.65e-05	Vero	0.0001	VSVG
7	Ver10_A2	0.000106692	1.99e-05	6.78e-05	0.000145614	Vero	0.0001	VSVG
8	Ver10_A2	0.000210788	1.31e-05	0.000185097	0.00023648	Vero	0.0001	VSVG
9	Ver10_A2	0.000318615	9.42e-06	0.000300151	0.000337079	Vero	0.0001	VSVG
10	Ver10_A2	0.000486194	1.08e-05	0.000464928	0.000507459	Vero	0.0001	VSVG
11	Ver10_A2	0.000808071	1.23e-05	0.000783877	0.000832266	Vero	0.0001	VSVG
12	Ver10_A2	0.00138579	9.99e-06	0.0013662	0.00140537	Vero	0.0001	VSVG
13	Ver10_A2	0.00279265	8.71e-06	0.00277557	0.00280973	Vero	0.0001	VSVG
14	Ver10_A2	0.00636584	1.36e-05	0.00633913	0.00639254	Vero	0.0001	VSVG
15	Ver10_A2	0.0126285	1.71e-05	0.012595	0.0126619	Vero	0.0001	VSVG
16	Ver10_A2	0.0211725	1.77e-05	0.0211377	0.0212073	Vero	0.0001	VSVG
17	Ver10_A2	0.0315462	1.61e-05	0.0315146	0.0315778	Vero	0.0001	VSVG
18	Ver10_A2	0.0432978	1.32e-05	0.0432718	0.0433237	Vero	0.0001	VSVG
19	Ver10_A2	0.0559754	1.07e-05	0.0559545	0.0559964	Vero	0.0001	VSVG
20	Ver10_A2	0.0691275	1.1e-05	0.0691059	0.069149	Vero	0.0001	VSVG
21	Ver10_A2	0.0823666	1.46e-05	0.082338	0.0823952	Vero	0.0001	VSVG
0	Ver10_B2	0	0.000172486	0	0	Vero	0.0001	VSVG
1	Ver10_B2	0	0.000154246	0	0	Vero	0.0001	VSVG
2	Ver10_B2	0	0.000136045	0	0	Vero	0.0001	VSVG
3	Ver10_B2	0	0.0001179	0	0	Vero	0.0001	VSVG
4	Ver10_B2	0	9.98e-05	0	0	Vero	0.0001	VSVG
5	Ver10_B2	0	8.19e-05	0	0	Vero	0.0001	VSVG
6	Ver10_B2	0	6.43e-05	0	0	Vero	0.0001	VSVG
7	Ver10_B2	0	4.72e-05	0	0	Vero	0.0001	VSVG
8	Ver10_B2	0	3.16e-05	0	0	Vero	0.0001	VSVG
9	Ver10_B2	0.000249943	2.12e-05	0.000208479	0.000291406	Vero	0.0001	VSVG
10	Ver10_B2	0.000850548	2.23e-05	0.000806837	0.000894258	Vero	0.0001	VSVG
11	Ver10_B2	0.00127672	2.65e-05	0.00122471	0.00132874	Vero	0.0001	VSVG
12	Ver10_B2	0.00140288	2.3e-05	0.00135771	0.00144804	Vero	0.0001	VSVG
13	Ver10_B2	0.00140861	1.8e-05	0.00137324	0.00144399	Vero	0.0001	VSVG
14	Ver10_B2	0.00228808	2.79e-05	0.00223333	0.00234282	Vero	0.0001	VSVG
15	Ver10_B2	0.00465619	3.63e-05	0.00458507	0.00472731	Vero	0.0001	VSVG
16	Ver10_B2	0.0083272	3.85e-05	0.00825178	0.00840262	Vero	0.0001	VSVG
17	Ver10_B2	0.0130465	3.54e-05	0.012977	0.0131159	Vero	0.0001	VSVG
18	Ver10_B2	0.0185594	2.92e-05	0.0185021	0.0186166	Vero	0.0001	VSVG
19	Ver10_B2	0.0246112	2.34e-05	0.0245654	0.0246571	Vero	0.0001	VSVG
20	Ver10_B2	0.0309474	2.35e-05	0.0309014	0.0309935	Vero	0.0001	VSVG
21	Ver10_B2	0.0373426	3.1e-05	0.0372818	0.0374034	Vero	0.0001	VSVG
0	Ver11_A2	0	0.000113615	0	0	Vero	0.0001	VSVG
1	Ver11_A2	0	0.000102591	0	0	Vero	0.0001	VSVG
2	Ver11_A2	0	9.16e-05	0	0	Vero	0.0001	VSVG
3	Ver11_A2	0	8.06e-05	0	0	Vero	0.0001	VSVG
4	Ver11_A2	0	6.96e-05	0	0	Vero	0.0001	VSVG
5	Ver11_A2	0	5.87e-05	0	0	Vero	0.0001	VSVG
6	Ver11_A2	0	4.78e-05	0	0	Vero	0.0001	VSVG
7	Ver11_A2	0	3.71e-05	0	0	Vero	0.0001	VSVG
8	Ver11_A2	0	2.66e-05	0	0	Vero	0.0001	VSVG
9	Ver11_A2	0	1.69e-05	0	0	Vero	0.0001	VSVG
10	Ver11_A2	0.000113886	1.04e-05	9.36e-05	0.000134187	Vero	0.0001	VSVG
11	Ver11_A2	0.000380709	1.16e-05	0.000358033	0.000403384	Vero	0.0001	VSVG
12	Ver11_A2	0.000660418	1.25e-05	0.000635895	0.000684941	Vero	0.0001	VSVG
13	Ver11_A2	0.0013568	9.42e-06	0.00133833	0.00137526	Vero	0.0001	VSVG
14	Ver11_A2	0.00470822	1.3e-05	0.00468281	0.00473364	Vero	0.0001	VSVG
15	Ver11_A2	0.012767	1.75e-05	0.0127327	0.0128013	Vero	0.0001	VSVG
16	Ver11_A2	0.0254496	1.96e-05	0.0254111	0.025488	Vero	0.0001	VSVG
17	Ver11_A2	0.0422773	2.04e-05	0.0422372	0.0423173	Vero	0.0001	VSVG
18	Ver11_A2	0.0627716	2.07e-05	0.062731	0.0628122	Vero	0.0001	VSVG
19	Ver11_A2	0.086454	2.01e-05	0.0864145	0.0864935	Vero	0.0001	VSVG
20	Ver11_A2	0.112846	1.75e-05	0.112812	0.11288	Vero	0.0001	VSVG
21	Ver11_A2	0.141469	1.18e-05	0.141445	0.141492	Vero	0.0001	VSVG
22	Ver11_A2	0.171671	9.93e-06	0.171651	0.17169	Vero	0.0001	VSVG
23	Ver11_A2	0.202336	2.06e-05	0.202295	0.202376	Vero	0.0001	VSVG
0	Ver11_B2	0.000655492	0.000116151	0.000427835	0.000883148	Vero	0.0001	VSVG
1	Ver11_B2	0.000588146	0.000105049	0.000382249	0.000794043	Vero	0.0001	VSVG
2	Ver11_B2	0.000520801	9.4e-05	0.000336642	0.00070496	Vero	0.0001	VSVG
3	Ver11_B2	0.000453455	8.29e-05	0.000291004	0.000615907	Vero	0.0001	VSVG
4	Ver11_B2	0.00038611	7.18e-05	0.000245321	0.000526899	Vero	0.0001	VSVG
5	Ver11_B2	0.000318764	6.08e-05	0.000199569	0.00043796	Vero	0.0001	VSVG
6	Ver11_B2	0.000251419	4.99e-05	0.000153702	0.000349136	Vero	0.0001	VSVG
7	Ver11_B2	0.000184073	3.9e-05	0.000107623	0.000260523	Vero	0.0001	VSVG
8	Ver11_B2	0.000116728	2.84e-05	6.11e-05	0.000172367	Vero	0.0001	VSVG
9	Ver11_B2	4.94e-05	1.84e-05	1.33e-05	8.55e-05	Vero	0.0001	VSVG
10	Ver11_B2	0	1.1e-05	0	4.58e-06	Vero	0.0001	VSVG
11	Ver11_B2	2.44e-05	1.12e-05	2.47e-06	4.63e-05	Vero	0.0001	VSVG
12	Ver11_B2	0.000475876	1.28e-05	0.000450699	0.000501054	Vero	0.0001	VSVG
13	Ver11_B2	0.0017262	9.69e-06	0.00170722	0.00174518	Vero	0.0001	VSVG
14	Ver11_B2	0.00469782	1.22e-05	0.00467385	0.00472179	Vero	0.0001	VSVG
15	Ver11_B2	0.0104281	1.73e-05	0.0103942	0.0104619	Vero	0.0001	VSVG
16	Ver11_B2	0.0193032	1.98e-05	0.0192644	0.0193421	Vero	0.0001	VSVG
17	Ver11_B2	0.0315293	2.09e-05	0.0314885	0.0315702	Vero	0.0001	VSVG
18	Ver11_B2	0.0473123	2.13e-05	0.0472706	0.047354	Vero	0.0001	VSVG
19	Ver11_B2	0.0668582	2.09e-05	0.0668172	0.0668992	Vero	0.0001	VSVG
20	Ver11_B2	0.0903729	1.86e-05	0.0903365	0.0904092	Vero	0.0001	VSVG
21	Ver11_B2	0.118062	1.3e-05	0.118037	0.118088	Vero	0.0001	VSVG
22	Ver11_B2	0.149683	9.27e-06	0.149665	0.149701	Vero	0.0001	VSVG
23	Ver11_B2	0.182786	1.94e-05	0.182748	0.182824	Vero	0.0001	VSVG
0	Ver12_A1	0	0.031105	0	0.0537048	Vero	0.0001	VSVG
1	Ver12_A1	0	0.0278654	0	0.04819	Vero	0.0001	VSVG
2	Ver12_A1	0	0.0246324	0	0.0426881	Vero	0.0001	VSVG
3	Ver12_A1	0	0.0214088	0	0.0372049	Vero	0.0001	VSVG
4	Ver12_A1	0	0.0181999	0	0.0317502	Vero	0.0001	VSVG
5	Ver12_A1	0	0.0150149	0	0.0263425	Vero	0.0001	VSVG
6	Ver12_A1	0	0.0118731	0	0.0210196	Vero	0.0001	VSVG
7	Ver12_A1	0	0.00882093	0	0.0158721	Vero	0.0001	VSVG
8	Ver12_A1	0	0.00599662	0	0.0111714	Vero	0.0001	VSVG
9	Ver12_A1	0.000257123	0.00392894	0	0.00795784	Vero	0.0001	VSVG
10	Ver12_A1	0.00121985	0.0037679	0	0.00860493	Vero	0.0001	VSVG
11	Ver12_A1	0.00255102	0.00446871	0	0.0113097	Vero	0.0001	VSVG
12	Ver12_A1	0.0046311	0.00447269	0	0.0133976	Vero	0.0001	VSVG
13	Ver12_A1	0.00844126	0.004353	0	0.0169731	Vero	0.0001	VSVG
14	Ver12_A1	0.0151371	0.00450996	0.00629757	0.0239766	Vero	0.0001	VSVG
15	Ver12_A1	0.0258703	0.0042266	0.0175862	0.0341545	Vero	0.0001	VSVG
16	Ver12_A1	0.0409742	0.00375634	0.0336118	0.0483366	Vero	0.0001	VSVG
17	Ver12_A1	0.0589558	0.00414476	0.0508321	0.0670795	Vero	0.0001	VSVG
18	Ver12_A1	0.0784177	0.00404303	0.0704933	0.086342	Vero	0.0001	VSVG
19	Ver12_A1	0.100495	0.00409328	0.0924718	0.108517	Vero	0.0001	VSVG
20	Ver12_A1	0.127449	0.00407278	0.119466	0.135431	Vero	0.0001	VSVG
21	Ver12_A1	0.159906	0.00356789	0.152913	0.166899	Vero	0.0001	VSVG
22	Ver12_A1	0.19485	0.00547499	0.184119	0.205581	Vero	0.0001	VSVG
0	Ver12_A3	0	0.000408648	0	0	Vero	0.0001	VSVG
1	Ver12_A3	0	0.000366351	0	0	Vero	0.0001	VSVG
2	Ver12_A3	0	0.000324121	0	0	Vero	0.0001	VSVG
3	Ver12_A3	0	0.000281986	0	0	Vero	0.0001	VSVG
4	Ver12_A3	0	0.000239998	0	0	Vero	0.0001	VSVG
5	Ver12_A3	0	0.00019825	0	0	Vero	0.0001	VSVG
6	Ver12_A3	0	0.000156933	0	0	Vero	0.0001	VSVG
7	Ver12_A3	0	0.000116506	0	0	Vero	0.0001	VSVG
8	Ver12_A3	0	7.84e-05	0	0	Vero	0.0001	VSVG
9	Ver12_A3	0.000594973	4.83e-05	0.000500384	0.000689562	Vero	0.0001	VSVG
10	Ver12_A3	0.00218492	4.38e-05	0.00209911	0.00227072	Vero	0.0001	VSVG
11	Ver12_A3	0.00325569	5.43e-05	0.00314935	0.00336203	Vero	0.0001	VSVG
12	Ver12_A3	0.00380398	5.44e-05	0.00369732	0.00391065	Vero	0.0001	VSVG
13	Ver12_A3	0.00649399	5.33e-05	0.00638962	0.00659837	Vero	0.0001	VSVG
14	Ver12_A3	0.0150781	5.76e-05	0.0149652	0.015191	Vero	0.0001	VSVG
15	Ver12_A3	0.0333091	5.39e-05	0.0332035	0.0334147	Vero	0.0001	VSVG
16	Ver12_A3	0.0625209	4.55e-05	0.0624318	0.06261	Vero	0.0001	VSVG
17	Ver12_A3	0.0972011	5.41e-05	0.0970951	0.097307	Vero	0.0001	VSVG
18	Ver12_A3	0.131202	5.08e-05	0.131103	0.131302	Vero	0.0001	VSVG
19	Ver12_A3	0.163606	5.06e-05	0.163507	0.163706	Vero	0.0001	VSVG
20	Ver12_A3	0.196311	5.43e-05	0.196204	0.196417	Vero	0.0001	VSVG
21	Ver12_A3	0.230475	4.22e-05	0.230393	0.230558	Vero	0.0001	VSVG
22	Ver12_A3	0.265389	6.49e-05	0.265262	0.265517	Vero	0.0001	VSVG
0	Ver12_B1	0	0.0400954	0	0.077452	Vero	0.0001	VSVG
1	Ver12_B1	0	0.0360638	0	0.0696325	Vero	0.0001	VSVG
2	Ver12_B1	0	0.0320389	0	0.0618263	Vero	0.0001	VSVG
3	Ver12_B1	0	0.0280238	0	0.0540392	Vero	0.0001	VSVG
4	Ver12_B1	0	0.0240233	0	0.0462806	Vero	0.0001	VSVG
5	Ver12_B1	0	0.0200461	0	0.0385678	Vero	0.0001	VSVG
6	Ver12_B1	0	0.0161094	0	0.0309344	Vero	0.0001	VSVG
7	Ver12_B1	0	0.0122526	0	0.0234574	Vero	0.0001	VSVG
8	Ver12_B1	0	0.00858366	0	0.0163489	Vero	0.0001	VSVG
9	Ver12_B1	0	0.00549325	0	0.0103742	Vero	0.0001	VSVG
10	Ver12_B1	0	0.00434125	0	0.0083546	Vero	0.0001	VSVG
11	Ver12_B1	0.000881074	0.00517098	0	0.0110162	Vero	0.0001	VSVG
12	Ver12_B1	0.00343799	0.00546244	0	0.0141444	Vero	0.0001	VSVG
13	Ver12_B1	0.00811131	0.00525079	0	0.0184029	Vero	0.0001	VSVG
14	Ver12_B1	0.0154122	0.00538953	0.00484868	0.0259756	Vero	0.0001	VSVG
15	Ver12_B1	0.0258503	0.00524011	0.0155797	0.0361209	Vero	0.0001	VSVG
16	Ver12_B1	0.0396898	0.00455257	0.0307667	0.0486128	Vero	0.0001	VSVG
17	Ver12_B1	0.0562125	0.00490919	0.0465905	0.0658345	Vero	0.0001	VSVG
18	Ver12_B1	0.074629	0.00491447	0.0649966	0.0842614	Vero	0.0001	VSVG
19	Ver12_B1	0.0964418	0.00486716	0.0869022	0.105981	Vero	0.0001	VSVG
20	Ver12_B1	0.124769	0.00500455	0.11496	0.134577	Vero	0.0001	VSVG
21	Ver12_B1	0.161065	0.00429213	0.152652	0.169477	Vero	0.0001	VSVG
22	Ver12_B1	0.201499	0.0060972	0.189548	0.213449	Vero	0.0001	VSVG
0	Ver13_A1	0	0.0306023	0	0.0539972	Vero	0.0001	VSVG
1	Ver13_A1	0	0.0276668	0	0.0488714	Vero	0.0001	VSVG
2	Ver13_A1	0	0.0247357	0	0.0437541	Vero	0.0001	VSVG
3	Ver13_A1	0	0.0218107	0	0.0386489	Vero	0.0001	VSVG
4	Ver13_A1	0	0.0188946	0	0.0335613	Vero	0.0001	VSVG
5	Ver13_A1	0	0.0159925	0	0.028501	Vero	0.0001	VSVG
6	Ver13_A1	0	0.0131136	0	0.0234861	Vero	0.0001	VSVG
7	Ver13_A1	0	0.0102773	0	0.0185546	Vero	0.0001	VSVG
8	Ver13_A1	0	0.00753189	0	0.0138015	Vero	0.0001	VSVG
9	Ver13_A1	0	0.00502866	0	0.00952292	Vero	0.0001	VSVG
10	Ver13_A1	0.000300876	0.00336101	0	0.00688845	Vero	0.0001	VSVG
11	Ver13_A1	0.00103638	0.00347842	0	0.00785408	Vero	0.0001	VSVG
12	Ver13_A1	0.00203454	0.00403168	0	0.00993664	Vero	0.0001	VSVG
13	Ver13_A1	0.00383518	0.00395335	0	0.0115837	Vero	0.0001	VSVG
14	Ver13_A1	0.00794738	0.00392405	0.000256235	0.0156385	Vero	0.0001	VSVG
15	Ver13_A1	0.0160338	0.00401222	0.00816989	0.0238978	Vero	0.0001	VSVG
16	Ver13_A1	0.0296723	0.00353835	0.0227372	0.0366075	Vero	0.0001	VSVG
17	Ver13_A1	0.0481442	0.00339033	0.0414991	0.0547892	Vero	0.0001	VSVG
18	Ver13_A1	0.0682364	0.00369558	0.060993	0.0754797	Vero	0.0001	VSVG
19	Ver13_A1	0.0879137	0.00353687	0.0809814	0.0948459	Vero	0.0001	VSVG
20	Ver13_A1	0.107675	0.00368586	0.100451	0.114899	Vero	0.0001	VSVG
21	Ver13_A1	0.128135	0.00324469	0.121775	0.134495	Vero	0.0001	VSVG
22	Ver13_A1	0.148109	0.00377854	0.140703	0.155515	Vero	0.0001	VSVG
23	Ver13_A1	0.165591	0.00565944	0.154498	0.176683	Vero	0.0001	VSVG
24	Ver13_A1	0.180177	0.00733681	0.165797	0.194557	Vero	0.0001	VSVG
25	Ver13_A1	0.192121	0.00849821	0.175465	0.208778	Vero	0.0001	VSVG
26	Ver13_A1	0.201681	0.00912455	0.183796	0.219565	Vero	0.0001	VSVG
27	Ver13_A1	0.209111	0.00925658	0.190968	0.227254	Vero	0.0001	VSVG
28	Ver13_A1	0.21467	0.00895487	0.197119	0.232222	Vero	0.0001	VSVG
29	Ver13_A1	0.218613	0.00829197	0.202361	0.234865	Vero	0.0001	VSVG
30	Ver13_A1	0.221197	0.00735467	0.206782	0.235612	Vero	0.0001	VSVG
31	Ver13_A1	0.222678	0.00625581	0.210417	0.234939	Vero	0.0001	VSVG
32	Ver13_A1	0.223313	0.00516376	0.213192	0.233434	Vero	0.0001	VSVG
33	Ver13_A1	0.223358	0.00435536	0.214821	0.231894	Vero	0.0001	VSVG
34	Ver13_A1	0.223069	0.00419759	0.214842	0.231296	Vero	0.0001	VSVG
35	Ver13_A1	0.222689	0.00482988	0.213223	0.232156	Vero	0.0001	VSVG
0	Ver13_B1	0	0.0390575	0	0.0735279	Vero	0.0001	VSVG
1	Ver13_B1	0	0.0354065	0	0.0666625	Vero	0.0001	VSVG
2	Ver13_B1	0	0.03176	0	0.0598062	Vero	0.0001	VSVG
3	Ver13_B1	0	0.02812	0	0.0529625	Vero	0.0001	VSVG
4	Ver13_B1	0	0.0244894	0	0.0461371	Vero	0.0001	VSVG
5	Ver13_B1	0	0.0208729	0	0.0393394	Vero	0.0001	VSVG
6	Ver13_B1	0	0.0172794	0	0.0325869	Vero	0.0001	VSVG
7	Ver13_B1	0	0.0137272	0	0.0259153	Vero	0.0001	VSVG
8	Ver13_B1	0	0.0102591	0	0.0194084	Vero	0.0001	VSVG
9	Ver13_B1	0	0.00700117	0	0.0133136	Vero	0.0001	VSVG
10	Ver13_B1	0	0.00444392	0	0.0085946	Vero	0.0001	VSVG
11	Ver13_B1	0.000375324	0.00397339	0	0.00816317	Vero	0.0001	VSVG
12	Ver13_B1	0.00158541	0.00478307	0	0.0109602	Vero	0.0001	VSVG
13	Ver13_B1	0.00419733	0.00482928	0	0.0136627	Vero	0.0001	VSVG
14	Ver13_B1	0.00966806	0.00472245	0.000412058	0.0189241	Vero	0.0001	VSVG
15	Ver13_B1	0.0197417	0.00490962	0.0101189	0.0293646	Vero	0.0001	VSVG
16	Ver13_B1	0.0361445	0.0044439	0.0274345	0.0448545	Vero	0.0001	VSVG
17	Ver13_B1	0.0587055	0.00402883	0.050809	0.066602	Vero	0.0001	VSVG
18	Ver13_B1	0.0837352	0.00453034	0.0748557	0.0926146	Vero	0.0001	VSVG
19	Ver13_B1	0.108524	0.00431309	0.100071	0.116978	Vero	0.0001	VSVG
20	Ver13_B1	0.13422	0.00452596	0.125349	0.143091	Vero	0.0001	VSVG
21	Ver13_B1	0.16243	0.00405623	0.154479	0.17038	Vero	0.0001	VSVG
22	Ver13_B1	0.191256	0.00430536	0.182818	0.199695	Vero	0.0001	VSVG
23	Ver13_B1	0.216286	0.00662747	0.203296	0.229276	Vero	0.0001	VSVG
24	Ver13_B1	0.236124	0.00883966	0.218799	0.25345	Vero	0.0001	VSVG
25	Ver13_B1	0.251202	0.010415	0.230788	0.271615	Vero	0.0001	VSVG
26	Ver13_B1	0.261973	0.011311	0.239804	0.284143	Vero	0.0001	VSVG
27	Ver13_B1	0.268894	0.0115743	0.246208	0.291579	Vero	0.0001	VSVG
28	Ver13_B1	0.272418	0.0112778	0.250313	0.294522	Vero	0.0001	VSVG
29	Ver13_B1	0.273001	0.0105092	0.252403	0.293599	Vero	0.0001	VSVG
30	Ver13_B1	0.271097	0.00937145	0.252729	0.289465	Vero	0.0001	VSVG
31	Ver13_B1	0.267162	0.00799471	0.251492	0.282831	Vero	0.0001	VSVG
32	Ver13_B1	0.261649	0.00656789	0.248776	0.274522	Vero	0.0001	VSVG
33	Ver13_B1	0.255015	0.00540615	0.244419	0.265611	Vero	0.0001	VSVG
34	Ver13_B1	0.247714	0.00498479	0.237944	0.257484	Vero	0.0001	VSVG
35	Ver13_B1	0.240189	0.00559856	0.229216	0.251162	Vero	0.0001	VSVG
0	Ver18_A2	0	0.000315635	0	0	Vero	0.0001	VSVG
1	Ver18_A2	0	0.000288253	0	0	Vero	0.0001	VSVG
2	Ver18_A2	0	0.000260904	0	0	Vero	0.0001	VSVG
3	Ver18_A2	0	0.000233602	0	0	Vero	0.0001	VSVG
4	Ver18_A2	0	0.000206365	0	0	Vero	0.0001	VSVG
5	Ver18_A2	0	0.000179222	0	0	Vero	0.0001	VSVG
6	Ver18_A2	0	0.000152224	0	0	Vero	0.0001	VSVG
7	Ver18_A2	0	0.000125464	0	0	Vero	0.0001	VSVG
8	Ver18_A2	0	9.91e-05	0	0	Vero	0.0001	VSVG
9	Ver18_A2	0	7.37e-05	0	0	Vero	0.0001	VSVG
10	Ver18_A2	0	5.05e-05	0	6.44e-05	Vero	0.0001	VSVG
11	Ver18_A2	0.000363523	3.46e-05	0.00029579	0.000431257	Vero	0.0001	VSVG
12	Ver18_A2	0.00138033	3.45e-05	0.00131265	0.00144801	Vero	0.0001	VSVG
13	Ver18_A2	0.00397221	4.2e-05	0.00388986	0.00405456	Vero	0.0001	VSVG
14	Ver18_A2	0.00912808	4.44e-05	0.00904107	0.0092151	Vero	0.0001	VSVG
15	Ver18_A2	0.0180634	4.31e-05	0.0179789	0.0181479	Vero	0.0001	VSVG
16	Ver18_A2	0.0321157	4.39e-05	0.0320296	0.0322017	Vero	0.0001	VSVG
17	Ver18_A2	0.0526235	4.64e-05	0.0525326	0.0527145	Vero	0.0001	VSVG
18	Ver18_A2	0.0809258	4.48e-05	0.080838	0.0810135	Vero	0.0001	VSVG
19	Ver18_A2	0.117866	3.65e-05	0.117794	0.117937	Vero	0.0001	VSVG
20	Ver18_A2	0.160427	3.54e-05	0.160357	0.160496	Vero	0.0001	VSVG
21	Ver18_A2	0.203778	4.32e-05	0.203693	0.203863	Vero	0.0001	VSVG
22	Ver18_A2	0.243729	4.37e-05	0.243643	0.243814	Vero	0.0001	VSVG
23	Ver18_A2	0.278823	3.77e-05	0.278749	0.278897	Vero	0.0001	VSVG
24	Ver18_A2	0.308323	3.65e-05	0.308252	0.308395	Vero	0.0001	VSVG
25	Ver18_A2	0.331492	4.52e-05	0.331404	0.331581	Vero	0.0001	VSVG
26	Ver18_A2	0.347945	5.58e-05	0.347836	0.348055	Vero	0.0001	VSVG
27	Ver18_A2	0.35816	6.4e-05	0.358034	0.358285	Vero	0.0001	VSVG
28	Ver18_A2	0.362742	6.86e-05	0.362607	0.362876	Vero	0.0001	VSVG
29	Ver18_A2	0.362298	6.97e-05	0.362162	0.362435	Vero	0.0001	VSVG
30	Ver18_A2	0.357436	6.78e-05	0.357303	0.357569	Vero	0.0001	VSVG
31	Ver18_A2	0.348762	6.33e-05	0.348638	0.348886	Vero	0.0001	VSVG
32	Ver18_A2	0.336882	5.7e-05	0.336771	0.336994	Vero	0.0001	VSVG
33	Ver18_A2	0.322404	5e-05	0.322306	0.322502	Vero	0.0001	VSVG
34	Ver18_A2	0.305934	4.39e-05	0.305848	0.30602	Vero	0.0001	VSVG
35	Ver18_A2	0.288078	4.06e-05	0.287998	0.288158	Vero	0.0001	VSVG
36	Ver18_A2	0.269444	4.2e-05	0.269361	0.269526	Vero	0.0001	VSVG
37	Ver18_A2	0.2506	4.81e-05	0.250506	0.250695	Vero	0.0001	VSVG
0	Ver18_B2	0	0.000563274	0	0	Vero	0.0001	VSVG
1	Ver18_B2	0	0.000514905	0	0	Vero	0.0001	VSVG
2	Ver18_B2	0	0.000466595	0	0	Vero	0.0001	VSVG
3	Ver18_B2	0	0.000418365	0	0	Vero	0.0001	VSVG
4	Ver18_B2	0	0.000370245	0	0	Vero	0.0001	VSVG
5	Ver18_B2	0	0.000322286	0	0	Vero	0.0001	VSVG
6	Ver18_B2	0	0.000274571	0	0	Vero	0.0001	VSVG
7	Ver18_B2	0	0.000227254	0	0	Vero	0.0001	VSVG
8	Ver18_B2	0	0.000180649	0	0	Vero	0.0001	VSVG
9	Ver18_B2	0	0.00013549	0	0	Vero	0.0001	VSVG
10	Ver18_B2	0	9.39e-05	0	0	Vero	0.0001	VSVG
11	Ver18_B2	0.000350138	6.33e-05	0.000225993	0.000474283	Vero	0.0001	VSVG
12	Ver18_B2	0.00139799	5.99e-05	0.00128056	0.00151543	Vero	0.0001	VSVG
13	Ver18_B2	0.00364795	7.31e-05	0.00350476	0.00379114	Vero	0.0001	VSVG
14	Ver18_B2	0.00790591	7.86e-05	0.00775189	0.00805994	Vero	0.0001	VSVG
15	Ver18_B2	0.0151768	7.63e-05	0.0150273	0.0153263	Vero	0.0001	VSVG
16	Ver18_B2	0.0266189	7.68e-05	0.0264683	0.0267695	Vero	0.0001	VSVG
17	Ver18_B2	0.0433942	8.14e-05	0.0432346	0.0435538	Vero	0.0001	VSVG
18	Ver18_B2	0.0666649	8.01e-05	0.0665079	0.0668219	Vero	0.0001	VSVG
19	Ver18_B2	0.0972623	6.63e-05	0.0971322	0.0973923	Vero	0.0001	VSVG
20	Ver18_B2	0.132395	6.17e-05	0.132274	0.132516	Vero	0.0001	VSVG
21	Ver18_B2	0.167038	7.52e-05	0.166891	0.167185	Vero	0.0001	VSVG
22	Ver18_B2	0.196707	7.82e-05	0.196554	0.19686	Vero	0.0001	VSVG
23	Ver18_B2	0.22055	6.82e-05	0.220416	0.220683	Vero	0.0001	VSVG
24	Ver18_B2	0.239127	6.38e-05	0.239002	0.239252	Vero	0.0001	VSVG
25	Ver18_B2	0.253002	7.71e-05	0.25285	0.253153	Vero	0.0001	VSVG
26	Ver18_B2	0.262703	9.61e-05	0.262514	0.262891	Vero	0.0001	VSVG
27	Ver18_B2	0.268624	0.000111249	0.268406	0.268842	Vero	0.0001	VSVG
28	Ver18_B2	0.271129	0.000120244	0.270894	0.271365	Vero	0.0001	VSVG
29	Ver18_B2	0.270581	0.000123036	0.270339	0.270822	Vero	0.0001	VSVG
30	Ver18_B2	0.267341	0.000120245	0.267105	0.267577	Vero	0.0001	VSVG
31	Ver18_B2	0.261774	0.000112844	0.261552	0.261995	Vero	0.0001	VSVG
32	Ver18_B2	0.254241	0.000102139	0.254041	0.254441	Vero	0.0001	VSVG
33	Ver18_B2	0.245106	8.99e-05	0.244929	0.245282	Vero	0.0001	VSVG
34	Ver18_B2	0.234731	7.87e-05	0.234576	0.234885	Vero	0.0001	VSVG
35	Ver18_B2	0.223479	7.22e-05	0.223338	0.223621	Vero	0.0001	VSVG
36	Ver18_B2	0.211713	7.36e-05	0.211569	0.211858	Vero	0.0001	VSVG
37	Ver18_B2	0.199785	8.35e-05	0.199621	0.199948	Vero	0.0001	VSVG
0	Ver20_A2	0	0.000145577	0	0	Vero	0.0001	VSVG
1	Ver20_A2	0	0.000131882	0	0	Vero	0.0001	VSVG
2	Ver20_A2	0	0.00011821	0	0	Vero	0.0001	VSVG
3	Ver20_A2	0	0.000104569	0	0	Vero	0.0001	VSVG
4	Ver20_A2	0	9.1e-05	0	0	Vero	0.0001	VSVG
5	Ver20_A2	0	7.75e-05	0	0	Vero	0.0001	VSVG
6	Ver20_A2	0	6.4e-05	0	0	Vero	0.0001	VSVG
7	Ver20_A2	0	5.08e-05	0	0	Vero	0.0001	VSVG
8	Ver20_A2	0	3.81e-05	0	0	Vero	0.0001	VSVG
9	Ver20_A2	0	2.63e-05	0	0	Vero	0.0001	VSVG
10	Ver20_A2	0.000345472	1.79e-05	0.000310478	0.000380466	Vero	0.0001	VSVG
11	Ver20_A2	0.00119468	1.72e-05	0.00116105	0.00122832	Vero	0.0001	VSVG
12	Ver20_A2	0.0021096	2.05e-05	0.00206945	0.00214974	Vero	0.0001	VSVG
13	Ver20_A2	0.00313881	2.01e-05	0.00309938	0.00317824	Vero	0.0001	VSVG
14	Ver20_A2	0.00471543	1.61e-05	0.00468384	0.00474702	Vero	0.0001	VSVG
15	Ver20_A2	0.00809142	1.79e-05	0.00805632	0.00812652	Vero	0.0001	VSVG
16	Ver20_A2	0.0145534	2.53e-05	0.0145038	0.0146029	Vero	0.0001	VSVG
17	Ver20_A2	0.0243349	3.17e-05	0.0242727	0.0243971	Vero	0.0001	VSVG
18	Ver20_A2	0.0368591	3.59e-05	0.0367888	0.0369294	Vero	0.0001	VSVG
19	Ver20_A2	0.0515281	3.77e-05	0.0514542	0.0516019	Vero	0.0001	VSVG
20	Ver20_A2	0.0677441	3.75e-05	0.0676706	0.0678175	Vero	0.0001	VSVG
21	Ver20_A2	0.0849093	3.57e-05	0.0848393	0.0849793	Vero	0.0001	VSVG
22	Ver20_A2	0.102426	3.28e-05	0.102362	0.10249	Vero	0.0001	VSVG
23	Ver20_A2	0.119696	2.94e-05	0.119639	0.119754	Vero	0.0001	VSVG
24	Ver20_A2	0.136122	2.59e-05	0.136071	0.136173	Vero	0.0001	VSVG
25	Ver20_A2	0.151106	2.31e-05	0.151061	0.151151	Vero	0.0001	VSVG
26	Ver20_A2	0.16405	2.14e-05	0.164008	0.164092	Vero	0.0001	VSVG
27	Ver20_A2	0.174357	2.07e-05	0.174316	0.174397	Vero	0.0001	VSVG
28	Ver20_A2	0.181431	2.07e-05	0.18139	0.181472	Vero	0.0001	VSVG
29	Ver20_A2	0.184999	2.07e-05	0.184958	0.185039	Vero	0.0001	VSVG
30	Ver20_A2	0.18538	2.04e-05	0.185339	0.18542	Vero	0.0001	VSVG
31	Ver20_A2	0.182959	1.97e-05	0.18292	0.182997	Vero	0.0001	VSVG
32	Ver20_A2	0.178121	1.87e-05	0.178084	0.178157	Vero	0.0001	VSVG
33	Ver20_A2	0.17125	1.76e-05	0.171216	0.171285	Vero	0.0001	VSVG
34	Ver20_A2	0.162732	1.69e-05	0.162699	0.162765	Vero	0.0001	VSVG
35	Ver20_A2	0.152951	1.69e-05	0.152917	0.152984	Vero	0.0001	VSVG
36	Ver20_A2	0.142291	1.79e-05	0.142256	0.142326	Vero	0.0001	VSVG
37	Ver20_A2	0.131138	2e-05	0.131098	0.131177	Vero	0.0001	VSVG
38	Ver20_A2	0.119852	2.28e-05	0.119807	0.119896	Vero	0.0001	VSVG
0	Ver20_B2	0.00110684	0.000103216	0.000904532	0.00130914	Vero	0.0001	VSVG
1	Ver20_B2	0.00101012	9.36e-05	0.00082659	0.00119366	Vero	0.0001	VSVG
2	Ver20_B2	0.00091341	8.41e-05	0.000748619	0.0010782	Vero	0.0001	VSVG
3	Ver20_B2	0.000816698	7.45e-05	0.000670607	0.000962789	Vero	0.0001	VSVG
4	Ver20_B2	0.000719986	6.5e-05	0.000592536	0.000847435	Vero	0.0001	VSVG
5	Ver20_B2	0.000623273	5.56e-05	0.000514377	0.00073217	Vero	0.0001	VSVG
6	Ver20_B2	0.000526561	4.62e-05	0.000436073	0.000617049	Vero	0.0001	VSVG
7	Ver20_B2	0.000429848	3.69e-05	0.000357516	0.000502181	Vero	0.0001	VSVG
8	Ver20_B2	0.000333136	2.79e-05	0.000278452	0.00038782	Vero	0.0001	VSVG
9	Ver20_B2	0.000236424	1.95e-05	0.000198174	0.000274673	Vero	0.0001	VSVG
10	Ver20_B2	0.000142027	1.3e-05	0.000116526	0.000167528	Vero	0.0001	VSVG
11	Ver20_B2	0.000332519	1.16e-05	0.000309734	0.000355303	Vero	0.0001	VSVG
12	Ver20_B2	0.00163477	1.39e-05	0.00160744	0.00166209	Vero	0.0001	VSVG
13	Ver20_B2	0.00493815	1.42e-05	0.00491033	0.00496597	Vero	0.0001	VSVG
14	Ver20_B2	0.0110285	1.14e-05	0.0110062	0.0110508	Vero	0.0001	VSVG
15	Ver20_B2	0.0203525	1.2e-05	0.020329	0.020376	Vero	0.0001	VSVG
16	Ver20_B2	0.0332625	1.71e-05	0.0332289	0.0332961	Vero	0.0001	VSVG
17	Ver20_B2	0.0495871	2.19e-05	0.0495443	0.04963	Vero	0.0001	VSVG
18	Ver20_B2	0.0686532	2.5e-05	0.0686043	0.0687021	Vero	0.0001	VSVG
19	Ver20_B2	0.0897675	2.64e-05	0.0897157	0.0898192	Vero	0.0001	VSVG
20	Ver20_B2	0.112237	2.64e-05	0.112185	0.112288	Vero	0.0001	VSVG
21	Ver20_B2	0.135367	2.52e-05	0.135318	0.135417	Vero	0.0001	VSVG
22	Ver20_B2	0.158466	2.32e-05	0.158421	0.158512	Vero	0.0001	VSVG
23	Ver20_B2	0.18084	2.08e-05	0.180799	0.180881	Vero	0.0001	VSVG
24	Ver20_B2	0.201796	1.83e-05	0.20176	0.201832	Vero	0.0001	VSVG
25	Ver20_B2	0.22064	1.62e-05	0.220608	0.220671	Vero	0.0001	VSVG
26	Ver20_B2	0.236679	1.49e-05	0.236649	0.236708	Vero	0.0001	VSVG
27	Ver20_B2	0.249219	1.43e-05	0.249191	0.249247	Vero	0.0001	VSVG
28	Ver20_B2	0.25757	1.43e-05	0.257542	0.257598	Vero	0.0001	VSVG
29	Ver20_B2	0.261362	1.44e-05	0.261334	0.26139	Vero	0.0001	VSVG
30	Ver20_B2	0.260984	1.42e-05	0.260957	0.261012	Vero	0.0001	VSVG
31	Ver20_B2	0.256935	1.37e-05	0.256908	0.256962	Vero	0.0001	VSVG
32	Ver20_B2	0.249711	1.3e-05	0.249686	0.249737	Vero	0.0001	VSVG
33	Ver20_B2	0.23981	1.23e-05	0.239786	0.239834	Vero	0.0001	VSVG
34	Ver20_B2	0.227729	1.17e-05	0.227706	0.227752	Vero	0.0001	VSVG
35	Ver20_B2	0.213966	1.17e-05	0.213943	0.213989	Vero	0.0001	VSVG
36	Ver20_B2	0.199017	1.23e-05	0.198993	0.199041	Vero	0.0001	VSVG
37	Ver20_B2	0.18338	1.36e-05	0.183353	0.183407	Vero	0.0001	VSVG
38	Ver20_B2	0.167533	1.55e-05	0.167503	0.167564	Vero	0.0001	VSVG
0	Ver22_A2	0.000951802	0.000282815	0.000397484	0.00150612	Vero	0.0001	VSVG
1	Ver22_A2	0.000940788	0.000259924	0.000431336	0.00145024	Vero	0.0001	VSVG
2	Ver22_A2	0.000929774	0.00023708	0.000465096	0.00139445	Vero	0.0001	VSVG
3	Ver22_A2	0.000918759	0.000214298	0.000498735	0.00133878	Vero	0.0001	VSVG
4	Ver22_A2	0.000907745	0.0001916	0.000532209	0.00128328	Vero	0.0001	VSVG
5	Ver22_A2	0.000896731	0.00016902	0.000565452	0.00122801	Vero	0.0001	VSVG
6	Ver22_A2	0.000885716	0.000146612	0.000598357	0.00117308	Vero	0.0001	VSVG
7	Ver22_A2	0.000874702	0.000124469	0.000630743	0.00111866	Vero	0.0001	VSVG
8	Ver22_A2	0.000863688	0.000102763	0.000662272	0.0010651	Vero	0.0001	VSVG
9	Ver22_A2	0.000852674	8.18e-05	0.000692262	0.00101309	Vero	0.0001	VSVG
10	Ver22_A2	0.000841659	6.25e-05	0.000719157	0.000964162	Vero	0.0001	VSVG
11	Ver22_A2	0.000830645	4.67e-05	0.000739031	0.000922259	Vero	0.0001	VSVG
12	Ver22_A2	0.000842576	3.91e-05	0.00076595	0.000919203	Vero	0.0001	VSVG
13	Ver22_A2	0.00103788	4.22e-05	0.0009552	0.00112057	Vero	0.0001	VSVG
14	Ver22_A2	0.00162798	4.93e-05	0.00153136	0.00172459	Vero	0.0001	VSVG
15	Ver22_A2	0.00282434	5.28e-05	0.00272081	0.00292788	Vero	0.0001	VSVG
16	Ver22_A2	0.00483848	4.87e-05	0.00474301	0.00493394	Vero	0.0001	VSVG
17	Ver22_A2	0.0079089	3.8e-05	0.00783445	0.00798335	Vero	0.0001	VSVG
18	Ver22_A2	0.0126297	3.57e-05	0.0125597	0.0126997	Vero	0.0001	VSVG
19	Ver22_A2	0.0198457	4.45e-05	0.0197584	0.019933	Vero	0.0001	VSVG
20	Ver22_A2	0.0301481	4.64e-05	0.0300571	0.0302391	Vero	0.0001	VSVG
21	Ver22_A2	0.0427989	4.06e-05	0.0427193	0.0428785	Vero	0.0001	VSVG
22	Ver22_A2	0.0566337	3.75e-05	0.0565603	0.0567072	Vero	0.0001	VSVG
23	Ver22_A2	0.070488	4.48e-05	0.0704003	0.0705757	Vero	0.0001	VSVG
24	Ver22_A2	0.0833863	5.64e-05	0.0832756	0.0834969	Vero	0.0001	VSVG
25	Ver22_A2	0.0951883	6.67e-05	0.0950576	0.095319	Vero	0.0001	VSVG
26	Ver22_A2	0.105985	7.38e-05	0.10584	0.106129	Vero	0.0001	VSVG
27	Ver22_A2	0.115866	7.77e-05	0.115714	0.116018	Vero	0.0001	VSVG
28	Ver22_A2	0.124923	7.84e-05	0.124769	0.125077	Vero	0.0001	VSVG
29	Ver22_A2	0.133246	7.63e-05	0.133096	0.133396	Vero	0.0001	VSVG
30	Ver22_A2	0.140926	7.19e-05	0.140785	0.141067	Vero	0.0001	VSVG
31	Ver22_A2	0.148053	6.56e-05	0.147924	0.148182	Vero	0.0001	VSVG
32	Ver22_A2	0.154718	5.83e-05	0.154604	0.154832	Vero	0.0001	VSVG
33	Ver22_A2	0.161012	5.1e-05	0.160912	0.161112	Vero	0.0001	VSVG
34	Ver22_A2	0.167025	4.52e-05	0.166936	0.167113	Vero	0.0001	VSVG
35	Ver22_A2	0.172847	4.26e-05	0.172764	0.172931	Vero	0.0001	VSVG
36	Ver22_A2	0.17857	4.47e-05	0.178482	0.178658	Vero	0.0001	VSVG
37	Ver22_A2	0.184273	5.1e-05	0.184173	0.184373	Vero	0.0001	VSVG
0	Ver22_A3	0	0.000244784	0	0	Vero	0.0001	VSVG
1	Ver22_A3	0	0.00022507	0	0	Vero	0.0001	VSVG
2	Ver22_A3	0	0.000205395	0	0	Vero	0.0001	VSVG
3	Ver22_A3	0	0.000185772	0	0	Vero	0.0001	VSVG
4	Ver22_A3	0	0.000166219	0	0	Vero	0.0001	VSVG
5	Ver22_A3	0	0.000146764	0	0	Vero	0.0001	VSVG
6	Ver22_A3	0	0.000127451	0	0	Vero	0.0001	VSVG
7	Ver22_A3	0	0.000108358	0	0	Vero	0.0001	VSVG
8	Ver22_A3	0	8.96e-05	0	0	Vero	0.0001	VSVG
9	Ver22_A3	0	7.15e-05	0	0	Vero	0.0001	VSVG
10	Ver22_A3	0	5.47e-05	0	0	Vero	0.0001	VSVG
11	Ver22_A3	0	4.08e-05	0	2.36e-05	Vero	0.0001	VSVG
12	Ver22_A3	0.00149179	3.36e-05	0.00142596	0.00155762	Vero	0.0001	VSVG
13	Ver22_A3	0.00316004	3.57e-05	0.00308998	0.0032301	Vero	0.0001	VSVG
14	Ver22_A3	0.00509793	4.18e-05	0.00501594	0.00517992	Vero	0.0001	VSVG
15	Ver22_A3	0.00745524	4.51e-05	0.00736687	0.00754361	Vero	0.0001	VSVG
16	Ver22_A3	0.0103818	4.18e-05	0.0102998	0.0104638	Vero	0.0001	VSVG
17	Ver22_A3	0.0140464	3.27e-05	0.0139823	0.0141106	Vero	0.0001	VSVG
18	Ver22_A3	0.018886	3.05e-05	0.0188261	0.0189458	Vero	0.0001	VSVG
19	Ver22_A3	0.0255344	3.81e-05	0.0254598	0.0256089	Vero	0.0001	VSVG
20	Ver22_A3	0.0344375	3.98e-05	0.0343594	0.0345156	Vero	0.0001	VSVG
21	Ver22_A3	0.0449986	3.49e-05	0.0449301	0.045067	Vero	0.0001	VSVG
22	Ver22_A3	0.0562699	3.21e-05	0.056207	0.0563328	Vero	0.0001	VSVG
23	Ver22_A3	0.0673034	3.82e-05	0.0672285	0.0673783	Vero	0.0001	VSVG
24	Ver22_A3	0.0773001	4.82e-05	0.0772056	0.0773946	Vero	0.0001	VSVG
25	Ver22_A3	0.0861533	5.7e-05	0.0860415	0.086265	Vero	0.0001	VSVG
26	Ver22_A3	0.093957	6.32e-05	0.0938331	0.094081	Vero	0.0001	VSVG
27	Ver22_A3	0.100806	6.66e-05	0.100675	0.100936	Vero	0.0001	VSVG
28	Ver22_A3	0.106794	6.73e-05	0.106662	0.106925	Vero	0.0001	VSVG
29	Ver22_A3	0.112015	6.55e-05	0.111886	0.112143	Vero	0.0001	VSVG
30	Ver22_A3	0.116564	6.18e-05	0.116443	0.116685	Vero	0.0001	VSVG
31	Ver22_A3	0.120535	5.65e-05	0.120424	0.120645	Vero	0.0001	VSVG
32	Ver22_A3	0.124022	5.02e-05	0.123923	0.12412	Vero	0.0001	VSVG
33	Ver22_A3	0.127119	4.39e-05	0.127033	0.127205	Vero	0.0001	VSVG
34	Ver22_A3	0.129921	3.89e-05	0.129845	0.129997	Vero	0.0001	VSVG
35	Ver22_A3	0.132522	3.65e-05	0.132451	0.132594	Vero	0.0001	VSVG
36	Ver22_A3	0.135016	3.82e-05	0.134942	0.135091	Vero	0.0001	VSVG
37	Ver22_A3	0.137488	4.35e-05	0.137403	0.137573	Vero	0.0001	VSVG
0	Ver22_B2	0	0.0202205	0	0.0275087	Vero	0.0001	VSVG
1	Ver22_B2	0	0.0186303	0	0.0255288	Vero	0.0001	VSVG
2	Ver22_B2	0	0.0170436	0	0.0235555	Vero	0.0001	VSVG
3	Ver22_B2	0	0.0154613	0	0.0215911	Vero	0.0001	VSVG
4	Ver22_B2	0	0.0138851	0	0.0196385	Vero	0.0001	VSVG
5	Ver22_B2	0	0.0123172	0	0.0177024	Vero	0.0001	VSVG
6	Ver22_B2	0	0.0107614	0	0.0157898	Vero	0.0001	VSVG
7	Ver22_B2	0	0.00922368	0	0.0139126	Vero	0.0001	VSVG
8	Ver22_B2	0	0.00771489	0	0.0120922	Vero	0.0001	VSVG
9	Ver22_B2	0	0.00625602	0	0.0103697	Vero	0.0001	VSVG
10	Ver22_B2	0	0.00489192	0	0.00883286	Vero	0.0001	VSVG
11	Ver22_B2	0.000381521	0.00372813	0	0.00768865	Vero	0.0001	VSVG
12	Ver22_B2	0.00152958	0.00300627	0	0.00742186	Vero	0.0001	VSVG
13	Ver22_B2	0.00282314	0.00297832	0	0.00866064	Vero	0.0001	VSVG
14	Ver22_B2	0.00447238	0.00336805	0	0.0110738	Vero	0.0001	VSVG
15	Ver22_B2	0.0066886	0.00365018	0	0.013843	Vero	0.0001	VSVG
16	Ver22_B2	0.00968309	0.00349435	0.00283416	0.016532	Vero	0.0001	VSVG
17	Ver22_B2	0.0136838	0.00289089	0.00801764	0.0193499	Vero	0.0001	VSVG
18	Ver22_B2	0.0192476	0.00263846	0.0140762	0.0244189	Vero	0.0001	VSVG
19	Ver22_B2	0.0272328	0.00309441	0.0211677	0.0332978	Vero	0.0001	VSVG
20	Ver22_B2	0.038305	0.00325151	0.031932	0.044678	Vero	0.0001	VSVG
21	Ver22_B2	0.0517002	0.00295077	0.0459167	0.0574837	Vero	0.0001	VSVG
22	Ver22_B2	0.0660429	0.00281033	0.0605347	0.0715512	Vero	0.0001	VSVG
23	Ver22_B2	0.0799555	0.00329277	0.0735016	0.0864093	Vero	0.0001	VSVG
24	Ver22_B2	0.0922261	0.0040638	0.084261	0.100191	Vero	0.0001	VSVG
25	Ver22_B2	0.102638	0.00474666	0.0933344	0.111941	Vero	0.0001	VSVG
26	Ver22_B2	0.111342	0.00522933	0.101093	0.121592	Vero	0.0001	VSVG
27	Ver22_B2	0.118492	0.00549066	0.107731	0.129254	Vero	0.0001	VSVG
28	Ver22_B2	0.12424	0.00554018	0.113381	0.135099	Vero	0.0001	VSVG
29	Ver22_B2	0.128738	0.00540077	0.118152	0.139323	Vero	0.0001	VSVG
30	Ver22_B2	0.132138	0.00510374	0.122135	0.142142	Vero	0.0001	VSVG
31	Ver22_B2	0.134594	0.00468912	0.125403	0.143784	Vero	0.0001	VSVG
32	Ver22_B2	0.136257	0.00420926	0.128006	0.144507	Vero	0.0001	VSVG
33	Ver22_B2	0.137279	0.00373624	0.129956	0.144602	Vero	0.0001	VSVG
34	Ver22_B2	0.137814	0.00336946	0.13121	0.144418	Vero	0.0001	VSVG
35	Ver22_B2	0.138014	0.00322546	0.131692	0.144336	Vero	0.0001	VSVG
36	Ver22_B2	0.138031	0.00338198	0.131402	0.144659	Vero	0.0001	VSVG
37	Ver22_B2	0.138004	0.00381917	0.130518	0.145489	Vero	0.0001	VSVG
0	Ver23_A2	0	3.43e-05	0	0	Vero	0.0001	VSVG
1	Ver23_A2	0	3.12e-05	0	0	Vero	0.0001	VSVG
2	Ver23_A2	0	2.82e-05	0	0	Vero	0.0001	VSVG
3	Ver23_A2	0	2.51e-05	0	0	Vero	0.0001	VSVG
4	Ver23_A2	0	2.21e-05	0	0	Vero	0.0001	VSVG
5	Ver23_A2	0	1.91e-05	0	0	Vero	0.0001	VSVG
6	Ver23_A2	0	1.6e-05	0	0	Vero	0.0001	VSVG
7	Ver23_A2	0	1.31e-05	0	0	Vero	0.0001	VSVG
8	Ver23_A2	0	1.01e-05	0	0	Vero	0.0001	VSVG
9	Ver23_A2	0	7.35e-06	0	0	Vero	0.0001	VSVG
10	Ver23_A2	0	4.91e-06	0	0	Vero	0.0001	VSVG
11	Ver23_A2	0.000266985	3.63e-06	0.000259874	0.000274095	Vero	0.0001	VSVG
12	Ver23_A2	0.000525913	4.09e-06	0.000517896	0.000533931	Vero	0.0001	VSVG
13	Ver23_A2	0.000738247	4.67e-06	0.000729084	0.000747409	Vero	0.0001	VSVG
14	Ver23_A2	0.000908147	4.25e-06	0.00089982	0.000916474	Vero	0.0001	VSVG
15	Ver23_A2	0.00121295	3.65e-06	0.0012058	0.0012201	Vero	0.0001	VSVG
16	Ver23_A2	0.00189422	4.27e-06	0.00188585	0.00190259	Vero	0.0001	VSVG
17	Ver23_A2	0.00317844	5.58e-06	0.0031675	0.00318937	Vero	0.0001	VSVG
18	Ver23_A2	0.00512602	6.64e-06	0.00511301	0.00513902	Vero	0.0001	VSVG
19	Ver23_A2	0.0076949	7.26e-06	0.00768067	0.00770914	Vero	0.0001	VSVG
20	Ver23_A2	0.0108415	7.48e-06	0.0108269	0.0108562	Vero	0.0001	VSVG
21	Ver23_A2	0.0145224	7.37e-06	0.0145079	0.0145368	Vero	0.0001	VSVG
22	Ver23_A2	0.0186938	7.04e-06	0.01868	0.0187076	Vero	0.0001	VSVG
23	Ver23_A2	0.0233123	6.58e-06	0.0232994	0.0233252	Vero	0.0001	VSVG
24	Ver23_A2	0.0283343	6.09e-06	0.0283223	0.0283462	Vero	0.0001	VSVG
25	Ver23_A2	0.0337162	5.67e-06	0.0337051	0.0337273	Vero	0.0001	VSVG
26	Ver23_A2	0.0394145	5.34e-06	0.039404	0.039425	Vero	0.0001	VSVG
27	Ver23_A2	0.0453856	5.09e-06	0.0453756	0.0453955	Vero	0.0001	VSVG
28	Ver23_A2	0.0515859	4.82e-06	0.0515764	0.0515953	Vero	0.0001	VSVG
29	Ver23_A2	0.0579713	4.47e-06	0.0579626	0.0579801	Vero	0.0001	VSVG
30	Ver23_A2	0.0644871	4.04e-06	0.0644792	0.064495	Vero	0.0001	VSVG
31	Ver23_A2	0.0710692	3.67e-06	0.071062	0.0710764	Vero	0.0001	VSVG
32	Ver23_A2	0.0776534	3.57e-06	0.0776464	0.0776604	Vero	0.0001	VSVG
33	Ver23_A2	0.0841752	3.82e-06	0.0841677	0.0841827	Vero	0.0001	VSVG
34	Ver23_A2	0.0905703	4.35e-06	0.0905618	0.0905788	Vero	0.0001	VSVG
35	Ver23_A2	0.0967756	4.94e-06	0.0967659	0.0967853	Vero	0.0001	VSVG
36	Ver23_A2	0.102763	5.47e-06	0.102752	0.102774	Vero	0.0001	VSVG
37	Ver23_A2	0.108545	5.88e-06	0.108534	0.108557	Vero	0.0001	VSVG
38	Ver23_A2	0.114136	6.14e-06	0.114124	0.114148	Vero	0.0001	VSVG
39	Ver23_A2	0.119549	6.26e-06	0.119537	0.119561	Vero	0.0001	VSVG
40	Ver23_A2	0.1248	6.26e-06	0.124788	0.124812	Vero	0.0001	VSVG
41	Ver23_A2	0.129902	6.13e-06	0.12989	0.129914	Vero	0.0001	VSVG
42	Ver23_A2	0.134871	5.91e-06	0.134859	0.134882	Vero	0.0001	VSVG
43	Ver23_A2	0.139719	5.61e-06	0.139708	0.13973	Vero	0.0001	VSVG
44	Ver23_A2	0.144462	5.26e-06	0.144452	0.144473	Vero	0.0001	VSVG
45	Ver23_A2	0.149114	4.9e-06	0.149105	0.149124	Vero	0.0001	VSVG
46	Ver23_A2	0.15369	4.57e-06	0.153681	0.153698	Vero	0.0001	VSVG
47	Ver23_A2	0.158202	4.32e-06	0.158194	0.158211	Vero	0.0001	VSVG
48	Ver23_A2	0.162667	4.21e-06	0.162658	0.162675	Vero	0.0001	VSVG
49	Ver23_A2	0.167097	4.28e-06	0.167089	0.167106	Vero	0.0001	VSVG
50	Ver23_A2	0.171508	4.54e-06	0.171499	0.171517	Vero	0.0001	VSVG
51	Ver23_A2	0.175914	4.96e-06	0.175904	0.175923	Vero	0.0001	VSVG
0	Ver23_A3	0	3.73e-05	0	0	Vero	0.0001	VSVG
1	Ver23_A3	0	3.4e-05	0	0	Vero	0.0001	VSVG
2	Ver23_A3	0	3.07e-05	0	0	Vero	0.0001	VSVG
3	Ver23_A3	0	2.74e-05	0	0	Vero	0.0001	VSVG
4	Ver23_A3	0	2.41e-05	0	0	Vero	0.0001	VSVG
5	Ver23_A3	0	2.08e-05	0	0	Vero	0.0001	VSVG
6	Ver23_A3	0	1.75e-05	0	0	Vero	0.0001	VSVG
7	Ver23_A3	0	1.43e-05	0	0	Vero	0.0001	VSVG
8	Ver23_A3	0	1.11e-05	0	0	Vero	0.0001	VSVG
9	Ver23_A3	0	8.06e-06	0	0	Vero	0.0001	VSVG
10	Ver23_A3	7.52e-05	5.4e-06	6.47e-05	8.58e-05	Vero	0.0001	VSVG
11	Ver23_A3	0.000437151	3.94e-06	0.00042942	0.000444882	Vero	0.0001	VSVG
12	Ver23_A3	0.00103121	4.41e-06	0.00102257	0.00103984	Vero	0.0001	VSVG
13	Ver23_A3	0.00213018	5.06e-06	0.00212026	0.0021401	Vero	0.0001	VSVG
14	Ver23_A3	0.00400376	4.62e-06	0.00399469	0.00401282	Vero	0.0001	VSVG
15	Ver23_A3	0.00690002	3.95e-06	0.00689228	0.00690777	Vero	0.0001	VSVG
16	Ver23_A3	0.0110583	4.6e-06	0.0110492	0.0110673	Vero	0.0001	VSVG
17	Ver23_A3	0.0166967	6.03e-06	0.0166849	0.0167085	Vero	0.0001	VSVG
18	Ver23_A3	0.0237891	7.19e-06	0.023775	0.0238032	Vero	0.0001	VSVG
19	Ver23_A3	0.0321516	7.88e-06	0.0321362	0.0321671	Vero	0.0001	VSVG
20	Ver23_A3	0.0415977	8.13e-06	0.0415817	0.0416136	Vero	0.0001	VSVG
21	Ver23_A3	0.0519406	8.02e-06	0.0519249	0.0519564	Vero	0.0001	VSVG
22	Ver23_A3	0.0629941	7.65e-06	0.0629791	0.0630091	Vero	0.0001	VSVG
23	Ver23_A3	0.0745713	7.15e-06	0.0745573	0.0745854	Vero	0.0001	VSVG
24	Ver23_A3	0.086486	6.62e-06	0.086473	0.0864989	Vero	0.0001	VSVG
25	Ver23_A3	0.0985513	6.16e-06	0.0985393	0.0985634	Vero	0.0001	VSVG
26	Ver23_A3	0.110581	5.8e-06	0.11057	0.110592	Vero	0.0001	VSVG
27	Ver23_A3	0.122388	5.52e-06	0.122377	0.122399	Vero	0.0001	VSVG
28	Ver23_A3	0.133787	5.23e-06	0.133776	0.133797	Vero	0.0001	VSVG
29	Ver23_A3	0.144593	4.85e-06	0.144584	0.144603	Vero	0.0001	VSVG
30	Ver23_A3	0.15469	4.38e-06	0.154681	0.154698	Vero	0.0001	VSVG
31	Ver23_A3	0.16402	3.98e-06	0.164012	0.164028	Vero	0.0001	VSVG
32	Ver23_A3	0.172529	3.87e-06	0.172522	0.172537	Vero	0.0001	VSVG
33	Ver23_A3	0.180163	4.14e-06	0.180154	0.180171	Vero	0.0001	VSVG
34	Ver23_A3	0.186865	4.7e-06	0.186856	0.186874	Vero	0.0001	VSVG
35	Ver23_A3	0.192583	5.35e-06	0.192573	0.192593	Vero	0.0001	VSVG
36	Ver23_A3	0.197316	5.92e-06	0.197304	0.197328	Vero	0.0001	VSVG
37	Ver23_A3	0.201124	6.36e-06	0.201112	0.201137	Vero	0.0001	VSVG
38	Ver23_A3	0.204072	6.65e-06	0.204059	0.204085	Vero	0.0001	VSVG
39	Ver23_A3	0.206223	6.79e-06	0.20621	0.206236	Vero	0.0001	VSVG
40	Ver23_A3	0.207642	6.79e-06	0.207629	0.207655	Vero	0.0001	VSVG
41	Ver23_A3	0.208393	6.66e-06	0.20838	0.208406	Vero	0.0001	VSVG
42	Ver23_A3	0.208539	6.42e-06	0.208527	0.208552	Vero	0.0001	VSVG
43	Ver23_A3	0.208146	6.1e-06	0.208134	0.208158	Vero	0.0001	VSVG
44	Ver23_A3	0.207277	5.72e-06	0.207266	0.207289	Vero	0.0001	VSVG
45	Ver23_A3	0.205997	5.33e-06	0.205986	0.206007	Vero	0.0001	VSVG
46	Ver23_A3	0.204369	4.97e-06	0.204359	0.204379	Vero	0.0001	VSVG
47	Ver23_A3	0.202458	4.69e-06	0.202449	0.202467	Vero	0.0001	VSVG
48	Ver23_A3	0.200327	4.57e-06	0.200318	0.200336	Vero	0.0001	VSVG
49	Ver23_A3	0.198042	4.63e-06	0.198033	0.198051	Vero	0.0001	VSVG
50	Ver23_A3	0.195666	4.9e-06	0.195656	0.195675	Vero	0.0001	VSVG
51	Ver23_A3	0.193261	5.35e-06	0.19325	0.193271	Vero	0.0001	VSVG
0	Ver23_B2	0.00117937	3.75e-05	0.00110584	0.0012529	Vero	0.0001	VSVG
1	Ver23_B2	0.00108622	3.42e-05	0.00101911	0.00115332	Vero	0.0001	VSVG
2	Ver23_B2	0.000993063	3.1e-05	0.000932377	0.00105375	Vero	0.0001	VSVG
3	Ver23_B2	0.000899909	2.77e-05	0.000845631	0.000954187	Vero	0.0001	VSVG
4	Ver23_B2	0.000806755	2.44e-05	0.000758871	0.000854638	Vero	0.0001	VSVG
5	Ver23_B2	0.0007136	2.12e-05	0.00067209	0.000755111	Vero	0.0001	VSVG
6	Ver23_B2	0.000620446	1.79e-05	0.000585276	0.000655616	Vero	0.0001	VSVG
7	Ver23_B2	0.000527292	1.47e-05	0.000498407	0.000556176	Vero	0.0001	VSVG
8	Ver23_B2	0.000434137	1.16e-05	0.000411439	0.000456835	Vero	0.0001	VSVG
9	Ver23_B2	0.000340983	8.53e-06	0.000324261	0.000357705	Vero	0.0001	VSVG
10	Ver23_B2	0.000247829	5.76e-06	0.000236533	0.000259125	Vero	0.0001	VSVG
11	Ver23_B2	0.000159338	3.92e-06	0.00015165	0.000167027	Vero	0.0001	VSVG
12	Ver23_B2	0.000145556	4.06e-06	0.000137601	0.000153511	Vero	0.0001	VSVG
13	Ver23_B2	0.000324694	4.82e-06	0.000315244	0.000334143	Vero	0.0001	VSVG
14	Ver23_B2	0.000815396	4.58e-06	0.000806416	0.000824377	Vero	0.0001	VSVG
15	Ver23_B2	0.00172922	3.86e-06	0.00172166	0.00173679	Vero	0.0001	VSVG
16	Ver23_B2	0.00317355	4.27e-06	0.00316518	0.00318192	Vero	0.0001	VSVG
17	Ver23_B2	0.00525307	5.63e-06	0.00524204	0.0052641	Vero	0.0001	VSVG
18	Ver23_B2	0.00802034	6.81e-06	0.008007	0.00803369	Vero	0.0001	VSVG
19	Ver23_B2	0.0114801	7.54e-06	0.0114654	0.0114949	Vero	0.0001	VSVG
20	Ver23_B2	0.0156355	7.83e-06	0.0156201	0.0156508	Vero	0.0001	VSVG
21	Ver23_B2	0.0204893	7.75e-06	0.0204741	0.0205045	Vero	0.0001	VSVG
22	Ver23_B2	0.0260447	7.42e-06	0.0260302	0.0260592	Vero	0.0001	VSVG
23	Ver23_B2	0.0323046	6.94e-06	0.032291	0.0323182	Vero	0.0001	VSVG
24	Ver23_B2	0.0392721	6.43e-06	0.0392595	0.0392847	Vero	0.0001	VSVG
25	Ver23_B2	0.0469502	5.97e-06	0.0469385	0.0469619	Vero	0.0001	VSVG
26	Ver23_B2	0.0553418	5.61e-06	0.0553308	0.0553528	Vero	0.0001	VSVG
27	Ver23_B2	0.0644499	5.33e-06	0.0644395	0.0644604	Vero	0.0001	VSVG
28	Ver23_B2	0.0742777	5.06e-06	0.0742678	0.0742876	Vero	0.0001	VSVG
29	Ver23_B2	0.0848238	4.7e-06	0.0848146	0.084833	Vero	0.0001	VSVG
30	Ver23_B2	0.0959633	4.26e-06	0.095955	0.0959717	Vero	0.0001	VSVG
31	Ver23_B2	0.10743	3.86e-06	0.107423	0.107438	Vero	0.0001	VSVG
32	Ver23_B2	0.118951	3.72e-06	0.118943	0.118958	Vero	0.0001	VSVG
33	Ver23_B2	0.130251	3.95e-06	0.130243	0.130259	Vero	0.0001	VSVG
34	Ver23_B2	0.141058	4.47e-06	0.141049	0.141067	Vero	0.0001	VSVG
35	Ver23_B2	0.1511	5.1e-06	0.15109	0.151109	Vero	0.0001	VSVG
36	Ver23_B2	0.160232	5.66e-06	0.160221	0.160243	Vero	0.0001	VSVG
37	Ver23_B2	0.168499	6.1e-06	0.168487	0.168511	Vero	0.0001	VSVG
38	Ver23_B2	0.175962	6.39e-06	0.175949	0.175974	Vero	0.0001	VSVG
39	Ver23_B2	0.182678	6.53e-06	0.182666	0.182691	Vero	0.0001	VSVG
40	Ver23_B2	0.188709	6.54e-06	0.188696	0.188722	Vero	0.0001	VSVG
41	Ver23_B2	0.194114	6.43e-06	0.194101	0.194126	Vero	0.0001	VSVG
42	Ver23_B2	0.198952	6.2e-06	0.19894	0.198964	Vero	0.0001	VSVG
43	Ver23_B2	0.203283	5.9e-06	0.203271	0.203294	Vero	0.0001	VSVG
44	Ver23_B2	0.207166	5.54e-06	0.207155	0.207177	Vero	0.0001	VSVG
45	Ver23_B2	0.210662	5.16e-06	0.210652	0.210672	Vero	0.0001	VSVG
46	Ver23_B2	0.21383	4.81e-06	0.21382	0.213839	Vero	0.0001	VSVG
47	Ver23_B2	0.216729	4.53e-06	0.21672	0.216738	Vero	0.0001	VSVG
48	Ver23_B2	0.21942	4.4e-06	0.219411	0.219429	Vero	0.0001	VSVG
49	Ver23_B2	0.221962	4.45e-06	0.221953	0.22197	Vero	0.0001	VSVG
50	Ver23_B2	0.224414	4.69e-06	0.224404	0.224423	Vero	0.0001	VSVG
51	Ver23_B2	0.226835	5.11e-06	0.226825	0.226845	Vero	0.0001	VSVG
0	Ver26_A2	0.00486518	0.000239035	0.00439667	0.00533369	Vero	0.0001	VSVG
1	Ver26_A2	0.00446475	0.000219453	0.00403462	0.00489487	Vero	0.0001	VSVG
2	Ver26_A2	0.00406432	0.000199891	0.00367253	0.0044561	Vero	0.0001	VSVG
3	Ver26_A2	0.00366388	0.000180356	0.00331039	0.00401738	Vero	0.0001	VSVG
4	Ver26_A2	0.00326345	0.000160857	0.00294817	0.00357873	Vero	0.0001	VSVG
5	Ver26_A2	0.00286302	0.000141409	0.00258586	0.00314018	Vero	0.0001	VSVG
6	Ver26_A2	0.00246259	0.000122037	0.0022234	0.00270178	Vero	0.0001	VSVG
7	Ver26_A2	0.00206216	0.000102783	0.0018607	0.00226361	Vero	0.0001	VSVG
8	Ver26_A2	0.00166172	8.37e-05	0.00149761	0.00182584	Vero	0.0001	VSVG
9	Ver26_A2	0.00126129	6.51e-05	0.00113379	0.0013888	Vero	0.0001	VSVG
10	Ver26_A2	0.000860862	4.72e-05	0.000768344	0.00095338	Vero	0.0001	VSVG
11	Ver26_A2	0.00046043	3.16e-05	0.000398474	0.000522386	Vero	0.0001	VSVG
12	Ver26_A2	0.000151361	2.33e-05	0.000105738	0.000196984	Vero	0.0001	VSVG
13	Ver26_A2	0.000471611	2.63e-05	0.000420133	0.00052309	Vero	0.0001	VSVG
14	Ver26_A2	0.00209538	3.08e-05	0.00203507	0.00215569	Vero	0.0001	VSVG
15	Ver26_A2	0.00553285	2.97e-05	0.00547456	0.00559114	Vero	0.0001	VSVG
16	Ver26_A2	0.01067	2.6e-05	0.0106191	0.0107209	Vero	0.0001	VSVG
17	Ver26_A2	0.0172443	2.56e-05	0.017194	0.0172945	Vero	0.0001	VSVG
18	Ver26_A2	0.0249933	3.04e-05	0.0249336	0.025053	Vero	0.0001	VSVG
19	Ver26_A2	0.0336712	3.56e-05	0.0336013	0.033741	Vero	0.0001	VSVG
20	Ver26_A2	0.0431097	3.86e-05	0.0430339	0.0431854	Vero	0.0001	VSVG
21	Ver26_A2	0.053163	3.92e-05	0.0530861	0.0532399	Vero	0.0001	VSVG
22	Ver26_A2	0.0636854	3.79e-05	0.0636111	0.0637598	Vero	0.0001	VSVG
23	Ver26_A2	0.0745312	3.55e-05	0.0744616	0.0746008	Vero	0.0001	VSVG
24	Ver26_A2	0.0855545	3.28e-05	0.0854902	0.0856188	Vero	0.0001	VSVG
25	Ver26_A2	0.0966096	3.08e-05	0.0965493	0.0966699	Vero	0.0001	VSVG
26	Ver26_A2	0.107551	2.99e-05	0.107492	0.107609	Vero	0.0001	VSVG
27	Ver26_A2	0.118232	3.01e-05	0.118173	0.118291	Vero	0.0001	VSVG
28	Ver26_A2	0.128508	3.08e-05	0.128448	0.128568	Vero	0.0001	VSVG
29	Ver26_A2	0.138254	3.1e-05	0.138193	0.138315	Vero	0.0001	VSVG
30	Ver26_A2	0.147411	3.06e-05	0.147351	0.147471	Vero	0.0001	VSVG
31	Ver26_A2	0.155933	2.96e-05	0.155875	0.155991	Vero	0.0001	VSVG
32	Ver26_A2	0.163774	2.83e-05	0.163718	0.163829	Vero	0.0001	VSVG
33	Ver26_A2	0.170888	2.71e-05	0.170835	0.170941	Vero	0.0001	VSVG
34	Ver26_A2	0.177229	2.64e-05	0.177177	0.177281	Vero	0.0001	VSVG
35	Ver26_A2	0.182751	2.65e-05	0.182699	0.182803	Vero	0.0001	VSVG
36	Ver26_A2	0.187408	2.74e-05	0.187354	0.187462	Vero	0.0001	VSVG
37	Ver26_A2	0.191154	2.88e-05	0.191098	0.191211	Vero	0.0001	VSVG
38	Ver26_A2	0.193944	3.04e-05	0.193884	0.194003	Vero	0.0001	VSVG
39	Ver26_A2	0.195739	3.17e-05	0.195677	0.195801	Vero	0.0001	VSVG
40	Ver26_A2	0.196578	3.25e-05	0.196515	0.196642	Vero	0.0001	VSVG
41	Ver26_A2	0.196536	3.26e-05	0.196472	0.1966	Vero	0.0001	VSVG
42	Ver26_A2	0.195687	3.23e-05	0.195624	0.195751	Vero	0.0001	VSVG
43	Ver26_A2	0.194106	3.14e-05	0.194045	0.194168	Vero	0.0001	VSVG
44	Ver26_A2	0.191869	3.02e-05	0.191809	0.191928	Vero	0.0001	VSVG
45	Ver26_A2	0.189048	2.88e-05	0.188992	0.189105	Vero	0.0001	VSVG
46	Ver26_A2	0.185721	2.73e-05	0.185667	0.185774	Vero	0.0001	VSVG
47	Ver26_A2	0.18196	2.62e-05	0.181909	0.182012	Vero	0.0001	VSVG
48	Ver26_A2	0.177842	2.55e-05	0.177792	0.177892	Vero	0.0001	VSVG
49	Ver26_A2	0.173441	2.56e-05	0.173391	0.173491	Vero	0.0001	VSVG
50	Ver26_A2	0.168831	2.67e-05	0.168779	0.168884	Vero	0.0001	VSVG
51	Ver26_A2	0.164089	2.86e-05	0.164032	0.164145	Vero	0.0001	VSVG
52	Ver26_A2	0.159287	3.14e-05	0.159225	0.159349	Vero	0.0001	VSVG
0	Ver26_A3	0	0.0202377	0	0	Vero	0.0001	VSVG
1	Ver26_A3	0	0.0186866	0	0	Vero	0.0001	VSVG
2	Ver26_A3	0	0.0171391	0	0	Vero	0.0001	VSVG
3	Ver26_A3	0	0.0155962	0	0	Vero	0.0001	VSVG
4	Ver26_A3	0	0.0140595	0	0.000632863	Vero	0.0001	VSVG
5	Ver26_A3	0	0.0125313	0	0.00140518	Vero	0.0001	VSVG
6	Ver26_A3	0	0.0110152	0	0.00220107	Vero	0.0001	VSVG
7	Ver26_A3	0	0.00951679	0	0.00303178	Vero	0.0001	VSVG
8	Ver26_A3	0	0.00804611	0	0.00391679	Vero	0.0001	VSVG
9	Ver26_A3	0	0.00662161	0	0.00489233	Vero	0.0001	VSVG
10	Ver26_A3	0	0.00528082	0	0.00603192	Vero	0.0001	VSVG
11	Ver26_A3	0	0.00410654	0	0.00749789	Vero	0.0001	VSVG
12	Ver26_A3	0.00323991	0.00328263	0	0.00967388	Vero	0.0001	VSVG
13	Ver26_A3	0.00720996	0.00300091	0.00132818	0.0130917	Vero	0.0001	VSVG
14	Ver26_A3	0.011562	0.00306597	0.00555266	0.0175712	Vero	0.0001	VSVG
15	Ver26_A3	0.0164549	0.00312561	0.0103287	0.0225811	Vero	0.0001	VSVG
16	Ver26_A3	0.0218633	0.00319504	0.015601	0.0281256	Vero	0.0001	VSVG
17	Ver26_A3	0.0277134	0.00340004	0.0210493	0.0343774	Vero	0.0001	VSVG
18	Ver26_A3	0.0339313	0.00371286	0.026654	0.0412085	Vero	0.0001	VSVG
19	Ver26_A3	0.0404447	0.00397242	0.0326588	0.0482307	Vero	0.0001	VSVG
20	Ver26_A3	0.0471898	0.00410067	0.0391525	0.0552271	Vero	0.0001	VSVG
21	Ver26_A3	0.0541049	0.00410994	0.0460495	0.0621604	Vero	0.0001	VSVG
22	Ver26_A3	0.0611285	0.0040453	0.0531997	0.0690573	Vero	0.0001	VSVG
23	Ver26_A3	0.0681991	0.00396248	0.0604326	0.0759655	Vero	0.0001	VSVG
24	Ver26_A3	0.075255	0.00391137	0.0675888	0.0829213	Vero	0.0001	VSVG
25	Ver26_A3	0.0822349	0.00392	0.0745517	0.0899181	Vero	0.0001	VSVG
26	Ver26_A3	0.089077	0.0039839	0.0812686	0.0968854	Vero	0.0001	VSVG
27	Ver26_A3	0.0957199	0.00406809	0.0877465	0.103693	Vero	0.0001	VSVG
28	Ver26_A3	0.102102	0.00412027	0.0940264	0.110178	Vero	0.0001	VSVG
29	Ver26_A3	0.108171	0.00409691	0.100141	0.116201	Vero	0.0001	VSVG
30	Ver26_A3	0.113908	0.00400242	0.106063	0.121752	Vero	0.0001	VSVG
31	Ver26_A3	0.119298	0.0038665	0.11172	0.126877	Vero	0.0001	VSVG
32	Ver26_A3	0.124331	0.00372976	0.11702	0.131641	Vero	0.0001	VSVG
33	Ver26_A3	0.128991	0.0036352	0.121866	0.136116	Vero	0.0001	VSVG
34	Ver26_A3	0.133267	0.00361705	0.126178	0.140357	Vero	0.0001	VSVG
35	Ver26_A3	0.137146	0.00368872	0.129916	0.144376	Vero	0.0001	VSVG
36	Ver26_A3	0.140614	0.00383722	0.133093	0.148135	Vero	0.0001	VSVG
37	Ver26_A3	0.143659	0.00402809	0.135764	0.151554	Vero	0.0001	VSVG
38	Ver26_A3	0.146268	0.00421632	0.138004	0.154532	Vero	0.0001	VSVG
39	Ver26_A3	0.148432	0.00435771	0.139891	0.156973	Vero	0.0001	VSVG
40	Ver26_A3	0.150168	0.00443051	0.141484	0.158852	Vero	0.0001	VSVG
41	Ver26_A3	0.15151	0.00443195	0.142823	0.160197	Vero	0.0001	VSVG
42	Ver26_A3	0.152492	0.00436742	0.143932	0.161052	Vero	0.0001	VSVG
43	Ver26_A3	0.153147	0.00424829	0.14482	0.161473	Vero	0.0001	VSVG
44	Ver26_A3	0.153507	0.00409115	0.145489	0.161526	Vero	0.0001	VSVG
45	Ver26_A3	0.153608	0.00391789	0.145929	0.161287	Vero	0.0001	VSVG
46	Ver26_A3	0.153482	0.00375576	0.14612	0.160843	Vero	0.0001	VSVG
47	Ver26_A3	0.153162	0.00363643	0.146034	0.160289	Vero	0.0001	VSVG
48	Ver26_A3	0.152681	0.00359248	0.14564	0.159723	Vero	0.0001	VSVG
49	Ver26_A3	0.152074	0.00365063	0.144919	0.15923	Vero	0.0001	VSVG
50	Ver26_A3	0.151374	0.0038242	0.143879	0.158869	Vero	0.0001	VSVG
51	Ver26_A3	0.150613	0.00410983	0.142558	0.158669	Vero	0.0001	VSVG
52	Ver26_A3	0.149826	0.00449096	0.141024	0.158628	Vero	0.0001	VSVG
0	Ver26_B2	0	0.0480156	0	0.0406968	Vero	0.0001	VSVG
1	Ver26_B2	0	0.0442623	0	0.0378779	Vero	0.0001	VSVG
2	Ver26_B2	0	0.0405152	0	0.0350713	Vero	0.0001	VSVG
3	Ver26_B2	0	0.0367763	0	0.0322807	Vero	0.0001	VSVG
4	Ver26_B2	0	0.0330483	0	0.0295115	Vero	0.0001	VSVG
5	Ver26_B2	0	0.0293354	0	0.0267719	Vero	0.0001	VSVG
6	Ver26_B2	0	0.0256442	0	0.0240748	Vero	0.0001	VSVG
7	Ver26_B2	0	0.0219855	0	0.0214415	Vero	0.0001	VSVG
8	Ver26_B2	0	0.0183789	0	0.0189101	Vero	0.0001	VSVG
9	Ver26_B2	0	0.0148623	0	0.0165551	Vero	0.0001	VSVG
10	Ver26_B2	0	0.0115183	0	0.0145386	Vero	0.0001	VSVG
11	Ver26_B2	0	0.00855192	0	0.0132622	Vero	0.0001	VSVG
12	Ver26_B2	0.00109176	0.0065036	0	0.0138388	Vero	0.0001	VSVG
13	Ver26_B2	0.00625766	0.00606375	0	0.0181426	Vero	0.0001	VSVG
14	Ver26_B2	0.0127596	0.00652197	0	0.0255426	Vero	0.0001	VSVG
15	Ver26_B2	0.0212368	0.00663312	0.00823592	0.0342377	Vero	0.0001	VSVG
16	Ver26_B2	0.031622	0.00649821	0.0188855	0.0443585	Vero	0.0001	VSVG
17	Ver26_B2	0.043598	0.00675845	0.0303515	0.0568446	Vero	0.0001	VSVG
18	Ver26_B2	0.0568477	0.00752788	0.042093	0.0716023	Vero	0.0001	VSVG
19	Ver26_B2	0.0710544	0.00828661	0.0548127	0.0872962	Vero	0.0001	VSVG
20	Ver26_B2	0.0859075	0.00870357	0.0688485	0.102967	Vero	0.0001	VSVG
21	Ver26_B2	0.101098	0.0087649	0.0839191	0.118278	Vero	0.0001	VSVG
22	Ver26_B2	0.116318	0.00856875	0.0995232	0.133113	Vero	0.0001	VSVG
23	Ver26_B2	0.131258	0.00825782	0.115073	0.147443	Vero	0.0001	VSVG
24	Ver26_B2	0.145609	0.0079809	0.129967	0.161252	Vero	0.0001	VSVG
25	Ver26_B2	0.159063	0.00785019	0.143677	0.17445	Vero	0.0001	VSVG
26	Ver26_B2	0.171311	0.00789732	0.155833	0.18679	Vero	0.0001	VSVG
27	Ver26_B2	0.182045	0.00805812	0.166251	0.197839	Vero	0.0001	VSVG
28	Ver26_B2	0.190955	0.00820164	0.17488	0.20703	Vero	0.0001	VSVG
29	Ver26_B2	0.197813	0.00819855	0.181744	0.213882	Vero	0.0001	VSVG
30	Ver26_B2	0.202727	0.00802937	0.18699	0.218465	Vero	0.0001	VSVG
31	Ver26_B2	0.205895	0.0077443	0.190716	0.221074	Vero	0.0001	VSVG
32	Ver26_B2	0.207514	0.00742541	0.19296	0.222068	Vero	0.0001	VSVG
33	Ver26_B2	0.20778	0.00716881	0.193729	0.221831	Vero	0.0001	VSVG
34	Ver26_B2	0.206891	0.00706118	0.193051	0.22073	Vero	0.0001	VSVG
35	Ver26_B2	0.205043	0.00714989	0.191029	0.219057	Vero	0.0001	VSVG
36	Ver26_B2	0.202434	0.00742224	0.187886	0.216982	Vero	0.0001	VSVG
37	Ver26_B2	0.199261	0.00781055	0.183952	0.214569	Vero	0.0001	VSVG
38	Ver26_B2	0.19572	0.00821699	0.179615	0.211826	Vero	0.0001	VSVG
39	Ver26_B2	0.192	0.00854099	0.17526	0.208741	Vero	0.0001	VSVG
40	Ver26_B2	0.18818	0.00872677	0.171075	0.205284	Vero	0.0001	VSVG
41	Ver26_B2	0.184268	0.00876324	0.167092	0.201443	Vero	0.0001	VSVG
42	Ver26_B2	0.180271	0.00865797	0.163302	0.197241	Vero	0.0001	VSVG
43	Ver26_B2	0.176199	0.00843145	0.159673	0.192725	Vero	0.0001	VSVG
44	Ver26_B2	0.172058	0.00811503	0.156153	0.187963	Vero	0.0001	VSVG
45	Ver26_B2	0.167856	0.00775093	0.152664	0.183048	Vero	0.0001	VSVG
46	Ver26_B2	0.163601	0.00739281	0.149111	0.178091	Vero	0.0001	VSVG
47	Ver26_B2	0.159301	0.00710503	0.145375	0.173227	Vero	0.0001	VSVG
48	Ver26_B2	0.154963	0.00695706	0.141327	0.168599	Vero	0.0001	VSVG
49	Ver26_B2	0.150595	0.00701025	0.136855	0.164335	Vero	0.0001	VSVG
50	Ver26_B2	0.146205	0.00730028	0.131897	0.160514	Vero	0.0001	VSVG
51	Ver26_B2	0.141801	0.00782658	0.12646	0.157141	Vero	0.0001	VSVG
52	Ver26_B2	0.137389	0.00855731	0.120617	0.154161	Vero	0.0001	VSVG
0	Ver28_A2	0	0.0199643	0	0.0258249	Vero	0.0001	VSVG
1	Ver28_A2	0	0.0183935	0	0.0238583	Vero	0.0001	VSVG
2	Ver28_A2	0	0.0168262	0	0.0218986	Vero	0.0001	VSVG
3	Ver28_A2	0	0.0152636	0	0.0199481	Vero	0.0001	VSVG
4	Ver28_A2	0	0.0137072	0	0.0180097	Vero	0.0001	VSVG
5	Ver28_A2	0	0.0121595	0	0.0160882	Vero	0.0001	VSVG
6	Ver28_A2	0	0.0106241	0	0.014191	Vero	0.0001	VSVG
7	Ver28_A2	0	0.00910729	0	0.0123303	Vero	0.0001	VSVG
8	Ver28_A2	0	0.00762029	0	0.0105279	Vero	0.0001	VSVG
9	Ver28_A2	0	0.00618457	0	0.00882606	Vero	0.0001	VSVG
10	Ver28_A2	0	0.00484592	0	0.00731447	Vero	0.0001	VSVG
11	Ver28_A2	0	0.00371094	0	0.00620208	Vero	0.0001	VSVG
12	Ver28_A2	7.89e-05	0.00301171	0	0.00598186	Vero	0.0001	VSVG
13	Ver28_A2	0.00141821	0.00288028	0	0.00706357	Vero	0.0001	VSVG
14	Ver28_A2	0.00311845	0.00296384	0	0.00892758	Vero	0.0001	VSVG
15	Ver28_A2	0.00535456	0.00288651	0	0.0110121	Vero	0.0001	VSVG
16	Ver28_A2	0.00832807	0.0027808	0.0028777	0.0137784	Vero	0.0001	VSVG
17	Ver28_A2	0.0122543	0.00276462	0.0068356	0.0176729	Vero	0.0001	VSVG
18	Ver28_A2	0.0173162	0.00273118	0.0119631	0.0226693	Vero	0.0001	VSVG
19	Ver28_A2	0.0233438	0.00297945	0.0175041	0.0291836	Vero	0.0001	VSVG
20	Ver28_A2	0.0299557	0.00352944	0.023038	0.0368734	Vero	0.0001	VSVG
21	Ver28_A2	0.0369062	0.00399427	0.0290774	0.044735	Vero	0.0001	VSVG
22	Ver28_A2	0.0440832	0.00425474	0.0357439	0.0524225	Vero	0.0001	VSVG
23	Ver28_A2	0.0513797	0.00432433	0.042904	0.0598554	Vero	0.0001	VSVG
24	Ver28_A2	0.0586889	0.00425848	0.0503422	0.0670355	Vero	0.0001	VSVG
25	Ver28_A2	0.0659038	0.00412647	0.0578159	0.0739917	Vero	0.0001	VSVG
26	Ver28_A2	0.0729176	0.00399504	0.0650873	0.0807478	Vero	0.0001	VSVG
27	Ver28_A2	0.0796233	0.00391098	0.0719578	0.0872889	Vero	0.0001	VSVG
28	Ver28_A2	0.0859142	0.0038851	0.0782994	0.093529	Vero	0.0001	VSVG
29	Ver28_A2	0.0916832	0.00388796	0.0840628	0.0993036	Vero	0.0001	VSVG
30	Ver28_A2	0.0968235	0.00386302	0.089252	0.104395	Vero	0.0001	VSVG
31	Ver28_A2	0.101268	0.00376285	0.0938931	0.108643	Vero	0.0001	VSVG
32	Ver28_A2	0.105069	0.00359982	0.0980138	0.112125	Vero	0.0001	VSVG
33	Ver28_A2	0.108301	0.00341967	0.101598	0.115003	Vero	0.0001	VSVG
34	Ver28_A2	0.111036	0.00328227	0.104603	0.117469	Vero	0.0001	VSVG
35	Ver28_A2	0.113349	0.00324324	0.106993	0.119706	Vero	0.0001	VSVG
36	Ver28_A2	0.115314	0.00332945	0.108789	0.12184	Vero	0.0001	VSVG
37	Ver28_A2	0.117005	0.00352406	0.110098	0.123912	Vero	0.0001	VSVG
38	Ver28_A2	0.118495	0.00377529	0.111096	0.125895	Vero	0.0001	VSVG
39	Ver28_A2	0.119859	0.00401792	0.111984	0.127734	Vero	0.0001	VSVG
40	Ver28_A2	0.121145	0.00420118	0.11291	0.129379	Vero	0.0001	VSVG
41	Ver28_A2	0.122363	0.0043076	0.11392	0.130806	Vero	0.0001	VSVG
42	Ver28_A2	0.123518	0.00433457	0.115023	0.132014	Vero	0.0001	VSVG
43	Ver28_A2	0.124616	0.00428746	0.116213	0.13302	Vero	0.0001	VSVG
44	Ver28_A2	0.125662	0.00417727	0.117475	0.13385	Vero	0.0001	VSVG
45	Ver28_A2	0.126661	0.0040198	0.118783	0.13454	Vero	0.0001	VSVG
46	Ver28_A2	0.127619	0.00383579	0.120101	0.135137	Vero	0.0001	VSVG
47	Ver28_A2	0.128541	0.00365136	0.121384	0.135697	Vero	0.0001	VSVG
48	Ver28_A2	0.129432	0.00349787	0.122576	0.136287	Vero	0.0001	VSVG
49	Ver28_A2	0.130297	0.00340957	0.123614	0.13698	Vero	0.0001	VSVG
50	Ver28_A2	0.131142	0.00341758	0.124444	0.137841	Vero	0.0001	VSVG
51	Ver28_A2	0.131972	0.00354113	0.125032	0.138913	Vero	0.0001	VSVG
52	Ver28_A2	0.132793	0.00378164	0.125381	0.140205	Vero	0.0001	VSVG
53	Ver28_A2	0.133609	0.00412436	0.125526	0.141693	Vero	0.0001	VSVG
0	Ver28_A3	0	0.00022157	0	0	Vero	0.0001	VSVG
1	Ver28_A3	0	0.000203073	0	0	Vero	0.0001	VSVG
2	Ver28_A3	0	0.000184598	0	0	Vero	0.0001	VSVG
3	Ver28_A3	0	0.000166153	0	0	Vero	0.0001	VSVG
4	Ver28_A3	0	0.000147748	0	0	Vero	0.0001	VSVG
5	Ver28_A3	0	0.000129401	0	0	Vero	0.0001	VSVG
6	Ver28_A3	0	0.000111139	0	0	Vero	0.0001	VSVG
7	Ver28_A3	0	9.3e-05	0	0	Vero	0.0001	VSVG
8	Ver28_A3	0	7.51e-05	0	0	Vero	0.0001	VSVG
9	Ver28_A3	0	5.77e-05	0	0	Vero	0.0001	VSVG
10	Ver28_A3	0	4.13e-05	0	0	Vero	0.0001	VSVG
11	Ver28_A3	0.00481117	2.78e-05	0.0047566	0.00486574	Vero	0.0001	VSVG
12	Ver28_A3	0.0106259	2.29e-05	0.0105811	0.0106707	Vero	0.0001	VSVG
13	Ver28_A3	0.0166252	2.67e-05	0.0165727	0.0166776	Vero	0.0001	VSVG
14	Ver28_A3	0.0229848	2.9e-05	0.022928	0.0230416	Vero	0.0001	VSVG
15	Ver28_A3	0.0299279	2.54e-05	0.0298781	0.0299777	Vero	0.0001	VSVG
16	Ver28_A3	0.0381392	2.53e-05	0.0380896	0.0381888	Vero	0.0001	VSVG
17	Ver28_A3	0.0485637	2.88e-05	0.0485074	0.0486201	Vero	0.0001	VSVG
18	Ver28_A3	0.062007	2.44e-05	0.0619593	0.0620548	Vero	0.0001	VSVG
19	Ver28_A3	0.0776194	2.31e-05	0.0775742	0.0776646	Vero	0.0001	VSVG
20	Ver28_A3	0.0935208	3.47e-05	0.0934527	0.0935889	Vero	0.0001	VSVG
21	Ver28_A3	0.108677	4.53e-05	0.108588	0.108766	Vero	0.0001	VSVG
22	Ver28_A3	0.122918	5.12e-05	0.122817	0.123018	Vero	0.0001	VSVG
23	Ver28_A3	0.136109	5.28e-05	0.136006	0.136213	Vero	0.0001	VSVG
24	Ver28_A3	0.148119	5.08e-05	0.14802	0.148219	Vero	0.0001	VSVG
25	Ver28_A3	0.158814	4.63e-05	0.158723	0.158905	Vero	0.0001	VSVG
26	Ver28_A3	0.168061	4.06e-05	0.167981	0.16814	Vero	0.0001	VSVG
27	Ver28_A3	0.175726	3.5e-05	0.175658	0.175795	Vero	0.0001	VSVG
28	Ver28_A3	0.181678	3.08e-05	0.181617	0.181738	Vero	0.0001	VSVG
29	Ver28_A3	0.185782	2.88e-05	0.185725	0.185838	Vero	0.0001	VSVG
30	Ver28_A3	0.187905	2.84e-05	0.187849	0.187961	Vero	0.0001	VSVG
31	Ver28_A3	0.188005	2.83e-05	0.18795	0.188061	Vero	0.0001	VSVG
32	Ver28_A3	0.186334	2.76e-05	0.18628	0.186389	Vero	0.0001	VSVG
33	Ver28_A3	0.183205	2.65e-05	0.183153	0.183257	Vero	0.0001	VSVG
34	Ver28_A3	0.178931	2.52e-05	0.178882	0.17898	Vero	0.0001	VSVG
35	Ver28_A3	0.173824	2.43e-05	0.173776	0.173872	Vero	0.0001	VSVG
36	Ver28_A3	0.168197	2.42e-05	0.16815	0.168245	Vero	0.0001	VSVG
37	Ver28_A3	0.162363	2.52e-05	0.162314	0.162412	Vero	0.0001	VSVG
38	Ver28_A3	0.156635	2.69e-05	0.156582	0.156688	Vero	0.0001	VSVG
39	Ver28_A3	0.151324	2.89e-05	0.151267	0.151381	Vero	0.0001	VSVG
40	Ver28_A3	0.146625	3.05e-05	0.146565	0.146685	Vero	0.0001	VSVG
41	Ver28_A3	0.142516	3.15e-05	0.142454	0.142578	Vero	0.0001	VSVG
42	Ver28_A3	0.138951	3.2e-05	0.138888	0.139014	Vero	0.0001	VSVG
43	Ver28_A3	0.135883	3.18e-05	0.135821	0.135946	Vero	0.0001	VSVG
44	Ver28_A3	0.133268	3.11e-05	0.133207	0.133329	Vero	0.0001	VSVG
45	Ver28_A3	0.131058	2.99e-05	0.130999	0.131116	Vero	0.0001	VSVG
46	Ver28_A3	0.129208	2.85e-05	0.129152	0.129264	Vero	0.0001	VSVG
47	Ver28_A3	0.127672	2.69e-05	0.127619	0.127725	Vero	0.0001	VSVG
48	Ver28_A3	0.126404	2.55e-05	0.126354	0.126454	Vero	0.0001	VSVG
49	Ver28_A3	0.125359	2.45e-05	0.125311	0.125407	Vero	0.0001	VSVG
50	Ver28_A3	0.124489	2.42e-05	0.124442	0.124537	Vero	0.0001	VSVG
51	Ver28_A3	0.12375	2.49e-05	0.123701	0.123798	Vero	0.0001	VSVG
52	Ver28_A3	0.123095	2.64e-05	0.123043	0.123146	Vero	0.0001	VSVG
53	Ver28_A3	0.122478	2.88e-05	0.122421	0.122534	Vero	0.0001	VSVG
0	Ver28_B2	0.0106254	7.94e-05	0.0104699	0.010781	Vero	0.0001	VSVG
1	Ver28_B2	0.00976334	7.28e-05	0.0096207	0.00990598	Vero	0.0001	VSVG
2	Ver28_B2	0.00890123	6.62e-05	0.00877147	0.009031	Vero	0.0001	VSVG
3	Ver28_B2	0.00803913	5.96e-05	0.00792222	0.00815604	Vero	0.0001	VSVG
4	Ver28_B2	0.00717702	5.31e-05	0.00707294	0.0072811	Vero	0.0001	VSVG
5	Ver28_B2	0.00631491	4.66e-05	0.00622362	0.00640621	Vero	0.0001	VSVG
6	Ver28_B2	0.00545281	4.01e-05	0.00537424	0.00553137	Vero	0.0001	VSVG
7	Ver28_B2	0.0045907	3.36e-05	0.00452478	0.00465662	Vero	0.0001	VSVG
8	Ver28_B2	0.00372859	2.73e-05	0.00367515	0.00378203	Vero	0.0001	VSVG
9	Ver28_B2	0.00286648	2.1e-05	0.00282524	0.00290773	Vero	0.0001	VSVG
10	Ver28_B2	0.00200438	1.52e-05	0.00197465	0.00203411	Vero	0.0001	VSVG
11	Ver28_B2	0.00114227	1.02e-05	0.00112222	0.00116232	Vero	0.0001	VSVG
12	Ver28_B2	0.000427608	8.11e-06	0.000411721	0.000443495	Vero	0.0001	VSVG
13	Ver28_B2	0.000693206	9.36e-06	0.000674861	0.00071155	Vero	0.0001	VSVG
14	Ver28_B2	0.00297087	1.03e-05	0.00295066	0.00299108	Vero	0.0001	VSVG
15	Ver28_B2	0.00824774	9.09e-06	0.00822993	0.00826555	Vero	0.0001	VSVG
16	Ver28_B2	0.016842	8.77e-06	0.0168248	0.0168592	Vero	0.0001	VSVG
17	Ver28_B2	0.0285571	1.01e-05	0.0285373	0.0285769	Vero	0.0001	VSVG
18	Ver28_B2	0.0431702	8.76e-06	0.043153	0.0431873	Vero	0.0001	VSVG
19	Ver28_B2	0.06029	8.05e-06	0.0602742	0.0603057	Vero	0.0001	VSVG
20	Ver28_B2	0.0794058	1.21e-05	0.0793822	0.0794295	Vero	0.0001	VSVG
21	Ver28_B2	0.0999863	1.59e-05	0.0999552	0.100017	Vero	0.0001	VSVG
22	Ver28_B2	0.121479	1.8e-05	0.121444	0.121515	Vero	0.0001	VSVG
23	Ver28_B2	0.143331	1.87e-05	0.143295	0.143368	Vero	0.0001	VSVG
24	Ver28_B2	0.164989	1.8e-05	0.164954	0.165025	Vero	0.0001	VSVG
25	Ver28_B2	0.1859	1.65e-05	0.185867	0.185932	Vero	0.0001	VSVG
26	Ver28_B2	0.205509	1.45e-05	0.205481	0.205538	Vero	0.0001	VSVG
27	Ver28_B2	0.223265	1.25e-05	0.22324	0.223289	Vero	0.0001	VSVG
28	Ver28_B2	0.238613	1.1e-05	0.238591	0.238634	Vero	0.0001	VSVG
29	Ver28_B2	0.251	1.02e-05	0.25098	0.25102	Vero	0.0001	VSVG
30	Ver28_B2	0.259873	1e-05	0.259854	0.259893	Vero	0.0001	VSVG
31	Ver28_B2	0.26486	1e-05	0.264841	0.26488	Vero	0.0001	VSVG
32	Ver28_B2	0.266312	9.8e-06	0.266292	0.266331	Vero	0.0001	VSVG
33	Ver28_B2	0.26476	9.42e-06	0.264741	0.264778	Vero	0.0001	VSVG
34	Ver28_B2	0.260736	8.96e-06	0.260719	0.260754	Vero	0.0001	VSVG
35	Ver28_B2	0.254773	8.61e-06	0.254757	0.25479	Vero	0.0001	VSVG
36	Ver28_B2	0.247403	8.56e-06	0.247386	0.24742	Vero	0.0001	VSVG
37	Ver28_B2	0.239158	8.87e-06	0.23914	0.239175	Vero	0.0001	VSVG
38	Ver28_B2	0.230569	9.46e-06	0.23055	0.230587	Vero	0.0001	VSVG
39	Ver28_B2	0.222168	1.01e-05	0.222148	0.222188	Vero	0.0001	VSVG
40	Ver28_B2	0.214335	1.07e-05	0.214314	0.214356	Vero	0.0001	VSVG
41	Ver28_B2	0.207083	1.11e-05	0.207061	0.207105	Vero	0.0001	VSVG
42	Ver28_B2	0.200365	1.13e-05	0.200343	0.200387	Vero	0.0001	VSVG
43	Ver28_B2	0.194136	1.12e-05	0.194114	0.194158	Vero	0.0001	VSVG
44	Ver28_B2	0.188352	1.1e-05	0.188331	0.188374	Vero	0.0001	VSVG
45	Ver28_B2	0.182968	1.06e-05	0.182948	0.182989	Vero	0.0001	VSVG
46	Ver28_B2	0.177939	1.01e-05	0.17792	0.177959	Vero	0.0001	VSVG
47	Ver28_B2	0.17322	9.54e-06	0.173202	0.173239	Vero	0.0001	VSVG
48	Ver28_B2	0.168766	9.04e-06	0.168748	0.168784	Vero	0.0001	VSVG
49	Ver28_B2	0.164532	8.68e-06	0.164515	0.164549	Vero	0.0001	VSVG
50	Ver28_B2	0.160473	8.56e-06	0.160457	0.16049	Vero	0.0001	VSVG
51	Ver28_B2	0.156545	8.76e-06	0.156528	0.156562	Vero	0.0001	VSVG
52	Ver28_B2	0.152702	9.29e-06	0.152684	0.15272	Vero	0.0001	VSVG
53	Ver28_B2	0.148899	1.01e-05	0.148879	0.148919	Vero	0.0001	VSVG
0	Ver10_A1	0.00236418	3.66e-05	0.00229242	0.00243593	Vero	0.001	VSVG
1	Ver10_A1	0.0020799	3.26e-05	0.00201597	0.00214384	Vero	0.001	VSVG
2	Ver10_A1	0.00179563	2.86e-05	0.00173949	0.00185177	Vero	0.001	VSVG
3	Ver10_A1	0.00151136	2.47e-05	0.00146299	0.00155973	Vero	0.001	VSVG
4	Ver10_A1	0.00122709	2.07e-05	0.00118645	0.00126774	Vero	0.001	VSVG
5	Ver10_A1	0.000942822	1.68e-05	0.000909824	0.000975821	Vero	0.001	VSVG
6	Ver10_A1	0.000658552	1.3e-05	0.000633057	0.000684046	Vero	0.001	VSVG
7	Ver10_A1	0.000374281	9.34e-06	0.000355968	0.000392594	Vero	0.001	VSVG
8	Ver10_A1	9e-05	6.15e-06	7.8e-05	0.000102056	Vero	0.001	VSVG
9	Ver10_A1	0	4.53e-06	0	0	Vero	0.001	VSVG
10	Ver10_A1	0	5.3e-06	0	0	Vero	0.001	VSVG
11	Ver10_A1	2.75e-05	5.94e-06	1.59e-05	3.92e-05	Vero	0.001	VSVG
12	Ver10_A1	0.000999412	4.71e-06	0.000990182	0.00100864	Vero	0.001	VSVG
13	Ver10_A1	0.00299188	4.3e-06	0.00298346	0.00300031	Vero	0.001	VSVG
14	Ver10_A1	0.00650302	6.68e-06	0.00648993	0.00651612	Vero	0.001	VSVG
15	Ver10_A1	0.0116416	8.27e-06	0.0116254	0.0116578	Vero	0.001	VSVG
16	Ver10_A1	0.0181485	8.53e-06	0.0181318	0.0181652	Vero	0.001	VSVG
17	Ver10_A1	0.0257509	7.72e-06	0.0257358	0.025766	Vero	0.001	VSVG
18	Ver10_A1	0.0341761	6.31e-06	0.0341638	0.0341885	Vero	0.001	VSVG
19	Ver10_A1	0.0431514	5.13e-06	0.0431414	0.0431615	Vero	0.001	VSVG
20	Ver10_A1	0.052404	5.35e-06	0.0523935	0.0524145	Vero	0.001	VSVG
21	Ver10_A1	0.0617043	7.11e-06	0.0616904	0.0617183	Vero	0.001	VSVG
0	Ver10_A3	0.000657433	5.14e-05	0.000556659	0.000758208	Vero	0.001	VSVG
1	Ver10_A3	0.000579782	4.59e-05	0.000489819	0.000669746	Vero	0.001	VSVG
2	Ver10_A3	0.000502131	4.04e-05	0.000422954	0.000581309	Vero	0.001	VSVG
3	Ver10_A3	0.00042448	3.49e-05	0.000356053	0.000492907	Vero	0.001	VSVG
4	Ver10_A3	0.000346829	2.95e-05	0.000289096	0.000404563	Vero	0.001	VSVG
5	Ver10_A3	0.000269178	2.4e-05	0.000222045	0.000316312	Vero	0.001	VSVG
6	Ver10_A3	0.000191527	1.87e-05	0.000154816	0.000228238	Vero	0.001	VSVG
7	Ver10_A3	0.000113876	1.36e-05	8.72e-05	0.000140548	Vero	0.001	VSVG
8	Ver10_A3	3.62e-05	9.02e-06	1.85e-05	5.39e-05	Vero	0.001	VSVG
9	Ver10_A3	0	6.28e-06	0	0	Vero	0.001	VSVG
10	Ver10_A3	8.17e-05	7.02e-06	6.79e-05	9.54e-05	Vero	0.001	VSVG
11	Ver10_A3	0.000708574	8.11e-06	0.00069267	0.000724477	Vero	0.001	VSVG
12	Ver10_A3	0.00218313	6.72e-06	0.00216997	0.0021963	Vero	0.001	VSVG
13	Ver10_A3	0.00497244	5.68e-06	0.0049613	0.00498358	Vero	0.001	VSVG
14	Ver10_A3	0.00977289	8.84e-06	0.00975557	0.00979022	Vero	0.001	VSVG
15	Ver10_A3	0.0168207	1.12e-05	0.0167988	0.0168425	Vero	0.001	VSVG
16	Ver10_A3	0.0257725	1.16e-05	0.0257497	0.0257954	Vero	0.001	VSVG
17	Ver10_A3	0.0362514	1.06e-05	0.0362306	0.0362722	Vero	0.001	VSVG
18	Ver10_A3	0.0478803	8.71e-06	0.0478632	0.0478974	Vero	0.001	VSVG
19	Ver10_A3	0.0602821	7.05e-06	0.0602683	0.060296	Vero	0.001	VSVG
20	Ver10_A3	0.0730799	7.28e-06	0.0730656	0.0730941	Vero	0.001	VSVG
21	Ver10_A3	0.0859503	9.66e-06	0.0859314	0.0859692	Vero	0.001	VSVG
0	Ver10_B1	0.00444766	2.88e-05	0.00439115	0.00450417	Vero	0.001	VSVG
1	Ver10_B1	0.00393546	2.58e-05	0.00388488	0.00398604	Vero	0.001	VSVG
2	Ver10_B1	0.00342325	2.28e-05	0.00337858	0.00346791	Vero	0.001	VSVG
3	Ver10_B1	0.00291104	1.98e-05	0.00287228	0.0029498	Vero	0.001	VSVG
4	Ver10_B1	0.00239883	1.68e-05	0.00236594	0.00243172	Vero	0.001	VSVG
5	Ver10_B1	0.00188662	1.38e-05	0.00185956	0.00191369	Vero	0.001	VSVG
6	Ver10_B1	0.00137441	1.09e-05	0.00135309	0.00139573	Vero	0.001	VSVG
7	Ver10_B1	0.000862205	8.04e-06	0.000846453	0.000877956	Vero	0.001	VSVG
8	Ver10_B1	0.000349996	5.42e-06	0.000339367	0.000360626	Vero	0.001	VSVG
9	Ver10_B1	0	3.58e-06	0	0	Vero	0.001	VSVG
10	Ver10_B1	0	3.63e-06	0	0	Vero	0.001	VSVG
11	Ver10_B1	0	4.37e-06	0	0	Vero	0.001	VSVG
12	Ver10_B1	0.000723516	3.91e-06	0.000715856	0.000731175	Vero	0.001	VSVG
13	Ver10_B1	0.00310063	2.98e-06	0.00309479	0.00310646	Vero	0.001	VSVG
14	Ver10_B1	0.0070487	4.48e-06	0.00703992	0.00705749	Vero	0.001	VSVG
15	Ver10_B1	0.0126587	5.9e-06	0.0126472	0.0126703	Vero	0.001	VSVG
16	Ver10_B1	0.0196915	6.31e-06	0.0196792	0.0197039	Vero	0.001	VSVG
17	Ver10_B1	0.0278699	5.84e-06	0.0278585	0.0278814	Vero	0.001	VSVG
18	Ver10_B1	0.0369168	4.83e-06	0.0369073	0.0369262	Vero	0.001	VSVG
19	Ver10_B1	0.0465549	3.88e-06	0.0465472	0.0465625	Vero	0.001	VSVG
20	Ver10_B1	0.0565071	3.9e-06	0.0564994	0.0565147	Vero	0.001	VSVG
21	Ver10_B1	0.0665263	5.14e-06	0.0665162	0.0665364	Vero	0.001	VSVG
0	Ver11_A1	0	5e-05	0	0	Vero	0.001	VSVG
1	Ver11_A1	0	4.51e-05	0	0	Vero	0.001	VSVG
2	Ver11_A1	0	4.03e-05	0	0	Vero	0.001	VSVG
3	Ver11_A1	0	3.54e-05	0	0	Vero	0.001	VSVG
4	Ver11_A1	0	3.05e-05	0	0	Vero	0.001	VSVG
5	Ver11_A1	0	2.57e-05	0	0	Vero	0.001	VSVG
6	Ver11_A1	0	2.09e-05	0	0	Vero	0.001	VSVG
7	Ver11_A1	0	1.62e-05	0	0	Vero	0.001	VSVG
8	Ver11_A1	0	1.15e-05	0	0	Vero	0.001	VSVG
9	Ver11_A1	0	7.29e-06	0	0	Vero	0.001	VSVG
10	Ver11_A1	0.000314838	4.54e-06	0.00030593	0.000323746	Vero	0.001	VSVG
11	Ver11_A1	0.00114994	5.18e-06	0.00113979	0.00116009	Vero	0.001	VSVG
12	Ver11_A1	0.0025455	5.51e-06	0.0025347	0.0025563	Vero	0.001	VSVG
13	Ver11_A1	0.00504082	4.18e-06	0.00503262	0.00504902	Vero	0.001	VSVG
14	Ver11_A1	0.00982071	5.8e-06	0.00980935	0.00983207	Vero	0.001	VSVG
15	Ver11_A1	0.0178326	7.75e-06	0.0178174	0.0178478	Vero	0.001	VSVG
16	Ver11_A1	0.028895	8.68e-06	0.028878	0.028912	Vero	0.001	VSVG
17	Ver11_A1	0.042628	9.06e-06	0.0426102	0.0426458	Vero	0.001	VSVG
18	Ver11_A1	0.0586519	9.23e-06	0.0586338	0.05867	Vero	0.001	VSVG
19	Ver11_A1	0.0765867	9e-06	0.0765691	0.0766043	Vero	0.001	VSVG
20	Ver11_A1	0.0960527	7.8e-06	0.0960374	0.096068	Vero	0.001	VSVG
21	Ver11_A1	0.11667	5.21e-06	0.11666	0.11668	Vero	0.001	VSVG
22	Ver11_A1	0.138012	4.5e-06	0.138003	0.13802	Vero	0.001	VSVG
23	Ver11_A1	0.15955	9.37e-06	0.159532	0.159569	Vero	0.001	VSVG
0	Ver11_A3	0	5.34e-05	0	0	Vero	0.001	VSVG
1	Ver11_A3	0	4.82e-05	0	0	Vero	0.001	VSVG
2	Ver11_A3	0	4.31e-05	0	0	Vero	0.001	VSVG
3	Ver11_A3	0	3.79e-05	0	0	Vero	0.001	VSVG
4	Ver11_A3	0	3.28e-05	0	0	Vero	0.001	VSVG
5	Ver11_A3	0	2.77e-05	0	0	Vero	0.001	VSVG
6	Ver11_A3	0	2.26e-05	0	0	Vero	0.001	VSVG
7	Ver11_A3	0	1.76e-05	0	0	Vero	0.001	VSVG
8	Ver11_A3	0	1.27e-05	0	0	Vero	0.001	VSVG
9	Ver11_A3	1.23e-05	8.09e-06	0	2.82e-05	Vero	0.001	VSVG
10	Ver11_A3	0.000336495	4.92e-06	0.000326845	0.000346144	Vero	0.001	VSVG
11	Ver11_A3	0.000668468	5.36e-06	0.000657964	0.000678971	Vero	0.001	VSVG
12	Ver11_A3	0.00102602	5.92e-06	0.00101442	0.00103762	Vero	0.001	VSVG
13	Ver11_A3	0.00157259	4.44e-06	0.00156389	0.00158128	Vero	0.001	VSVG
14	Ver11_A3	0.00329651	5.94e-06	0.00328487	0.00330815	Vero	0.001	VSVG
15	Ver11_A3	0.00719384	8.13e-06	0.0071779	0.00720977	Vero	0.001	VSVG
16	Ver11_A3	0.0132835	9.17e-06	0.0132655	0.0133015	Vero	0.001	VSVG
17	Ver11_A3	0.0213742	9.55e-06	0.0213555	0.0213929	Vero	0.001	VSVG
18	Ver11_A3	0.0312746	9.67e-06	0.0312557	0.0312936	Vero	0.001	VSVG
19	Ver11_A3	0.0427935	9.42e-06	0.042775	0.0428119	Vero	0.001	VSVG
20	Ver11_A3	0.0557393	8.22e-06	0.0557232	0.0557555	Vero	0.001	VSVG
21	Ver11_A3	0.0699209	5.6e-06	0.06991	0.0699319	Vero	0.001	VSVG
22	Ver11_A3	0.0850312	4.6e-06	0.0850221	0.0850402	Vero	0.001	VSVG
23	Ver11_A3	0.100424	9.52e-06	0.100405	0.100443	Vero	0.001	VSVG
0	Ver11_B1	0.00461033	9.3e-05	0.00442802	0.00479264	Vero	0.001	VSVG
1	Ver11_B1	0.00414402	8.42e-05	0.00397905	0.00430898	Vero	0.001	VSVG
2	Ver11_B1	0.0036777	7.53e-05	0.00353006	0.00382534	Vero	0.001	VSVG
3	Ver11_B1	0.00321138	6.65e-05	0.00308104	0.00334172	Vero	0.001	VSVG
4	Ver11_B1	0.00274506	5.77e-05	0.00263199	0.00285813	Vero	0.001	VSVG
5	Ver11_B1	0.00227874	4.89e-05	0.00218289	0.0023746	Vero	0.001	VSVG
6	Ver11_B1	0.00181242	4.02e-05	0.00173369	0.00189116	Vero	0.001	VSVG
7	Ver11_B1	0.00134611	3.15e-05	0.00128433	0.00140788	Vero	0.001	VSVG
8	Ver11_B1	0.000879788	2.3e-05	0.000834631	0.000924945	Vero	0.001	VSVG
9	Ver11_B1	0.000413469	1.5e-05	0.000383985	0.000442954	Vero	0.001	VSVG
10	Ver11_B1	0	8.93e-06	0	0	Vero	0.001	VSVG
11	Ver11_B1	0	8.79e-06	0	0	Vero	0.001	VSVG
12	Ver11_B1	0.00173605	1.03e-05	0.00171592	0.00175618	Vero	0.001	VSVG
13	Ver11_B1	0.00672186	7.83e-06	0.00670652	0.0067372	Vero	0.001	VSVG
14	Ver11_B1	0.0148548	9.51e-06	0.0148361	0.0148734	Vero	0.001	VSVG
15	Ver11_B1	0.0254216	1.36e-05	0.0253949	0.0254483	Vero	0.001	VSVG
16	Ver11_B1	0.0382356	1.57e-05	0.0382049	0.0382664	Vero	0.001	VSVG
17	Ver11_B1	0.0532818	1.65e-05	0.0532494	0.0533141	Vero	0.001	VSVG
18	Ver11_B1	0.070545	1.68e-05	0.070512	0.0705779	Vero	0.001	VSVG
19	Ver11_B1	0.0900102	1.65e-05	0.0899778	0.0900426	Vero	0.001	VSVG
20	Ver11_B1	0.111662	1.47e-05	0.111634	0.111691	Vero	0.001	VSVG
21	Ver11_B1	0.135487	1.05e-05	0.135466	0.135507	Vero	0.001	VSVG
22	Ver11_B1	0.161276	7.31e-06	0.161261	0.16129	Vero	0.001	VSVG
23	Ver11_B1	0.187827	1.5e-05	0.187798	0.187857	Vero	0.001	VSVG
0	Ver18_A1	0	0.0177508	0	0.00045293	Vero	0.001	VSVG
1	Ver18_A1	0	0.016206	0	0.00101849	Vero	0.001	VSVG
2	Ver18_A1	0	0.0146632	0	0.00158799	Vero	0.001	VSVG
3	Ver18_A1	0	0.0131232	0	0.00216279	Vero	0.001	VSVG
4	Ver18_A1	0	0.0115869	0	0.00274503	Vero	0.001	VSVG
5	Ver18_A1	0	0.0100561	0	0.00333811	Vero	0.001	VSVG
6	Ver18_A1	0	0.00853387	0	0.00394786	Vero	0.001	VSVG
7	Ver18_A1	0	0.00702567	0	0.00458513	Vero	0.001	VSVG
8	Ver18_A1	0	0.00554297	0	0.0052724	Vero	0.001	VSVG
9	Ver18_A1	0	0.00411346	0	0.00606393	Vero	0.001	VSVG
10	Ver18_A1	0.00159491	0.00281925	0	0.00712064	Vero	0.001	VSVG
11	Ver18_A1	0.0052566	0.00195186	0.00143096	0.00908225	Vero	0.001	VSVG
12	Ver18_A1	0.00980315	0.00198279	0.00591689	0.0136894	Vero	0.001	VSVG
13	Ver18_A1	0.0165127	0.00240009	0.0118085	0.0212169	Vero	0.001	VSVG
14	Ver18_A1	0.026613	0.0025242	0.0216656	0.0315605	Vero	0.001	VSVG
15	Ver18_A1	0.0408614	0.00245541	0.0360488	0.045674	Vero	0.001	VSVG
16	Ver18_A1	0.0597836	0.00250325	0.0548772	0.06469	Vero	0.001	VSVG
17	Ver18_A1	0.0839037	0.00263766	0.0787339	0.0890735	Vero	0.001	VSVG
18	Ver18_A1	0.113746	0.00253127	0.108785	0.118707	Vero	0.001	VSVG
19	Ver18_A1	0.149302	0.00206385	0.145256	0.153347	Vero	0.001	VSVG
20	Ver18_A1	0.186624	0.00202401	0.182657	0.190591	Vero	0.001	VSVG
21	Ver18_A1	0.220002	0.00245871	0.215183	0.224821	Vero	0.001	VSVG
22	Ver18_A1	0.245001	0.00246192	0.240176	0.249827	Vero	0.001	VSVG
23	Ver18_A1	0.262077	0.00213014	0.257902	0.266252	Vero	0.001	VSVG
24	Ver18_A1	0.272848	0.00209721	0.268738	0.276959	Vero	0.001	VSVG
25	Ver18_A1	0.278931	0.00260506	0.273825	0.284037	Vero	0.001	VSVG
26	Ver18_A1	0.281555	0.00320661	0.27527	0.28784	Vero	0.001	VSVG
27	Ver18_A1	0.281124	0.00365861	0.273953	0.288295	Vero	0.001	VSVG
28	Ver18_A1	0.277936	0.00391048	0.270272	0.285601	Vero	0.001	VSVG
29	Ver18_A1	0.272289	0.00396555	0.264516	0.280061	Vero	0.001	VSVG
30	Ver18_A1	0.26448	0.00384621	0.256942	0.272019	Vero	0.001	VSVG
31	Ver18_A1	0.254809	0.00358551	0.247782	0.261837	Vero	0.001	VSVG
32	Ver18_A1	0.243573	0.00322741	0.237247	0.249899	Vero	0.001	VSVG
33	Ver18_A1	0.23107	0.00283272	0.225518	0.236622	Vero	0.001	VSVG
34	Ver18_A1	0.217599	0.00248969	0.212719	0.222478	Vero	0.001	VSVG
35	Ver18_A1	0.203456	0.00231591	0.198917	0.207996	Vero	0.001	VSVG
36	Ver18_A1	0.188942	0.0024091	0.18422	0.193663	Vero	0.001	VSVG
37	Ver18_A1	0.174331	0.00276403	0.168914	0.179749	Vero	0.001	VSVG
0	Ver18_A3	0	0.000694849	0	0	Vero	0.001	VSVG
1	Ver18_A3	0	0.000634774	0	0	Vero	0.001	VSVG
2	Ver18_A3	0	0.000574772	0	0	Vero	0.001	VSVG
3	Ver18_A3	0	0.000514868	0	0	Vero	0.001	VSVG
4	Ver18_A3	0	0.000455102	0	0	Vero	0.001	VSVG
5	Ver18_A3	0	0.000395535	0	0	Vero	0.001	VSVG
6	Ver18_A3	0	0.000336274	0	0	Vero	0.001	VSVG
7	Ver18_A3	0	0.000277514	0	0	Vero	0.001	VSVG
8	Ver18_A3	0	0.000219659	0	0	Vero	0.001	VSVG
9	Ver18_A3	0	0.000163671	0	0	Vero	0.001	VSVG
10	Ver18_A3	0.00297895	0.000112373	0.00275869	0.0031992	Vero	0.001	VSVG
11	Ver18_A3	0.0076727	7.6e-05	0.00752375	0.00782165	Vero	0.001	VSVG
12	Ver18_A3	0.0139525	7.45e-05	0.0138066	0.0140985	Vero	0.001	VSVG
13	Ver18_A3	0.0244503	9.1e-05	0.0242719	0.0246287	Vero	0.001	VSVG
14	Ver18_A3	0.0416056	9.68e-05	0.0414159	0.0417952	Vero	0.001	VSVG
15	Ver18_A3	0.0656709	9.4e-05	0.0654867	0.0658551	Vero	0.001	VSVG
16	Ver18_A3	0.0956657	9.53e-05	0.0954789	0.0958525	Vero	0.001	VSVG
17	Ver18_A3	0.130596	0.000100651	0.130398	0.130793	Vero	0.001	VSVG
18	Ver18_A3	0.169466	9.75e-05	0.169275	0.169657	Vero	0.001	VSVG
19	Ver18_A3	0.210975	7.97e-05	0.210818	0.211131	Vero	0.001	VSVG
20	Ver18_A3	0.251286	7.66e-05	0.251136	0.251436	Vero	0.001	VSVG
21	Ver18_A3	0.285319	9.36e-05	0.285136	0.285503	Vero	0.001	VSVG
22	Ver18_A3	0.309041	9.54e-05	0.308854	0.309228	Vero	0.001	VSVG
23	Ver18_A3	0.323332	8.28e-05	0.323169	0.323494	Vero	0.001	VSVG
24	Ver18_A3	0.330499	7.9e-05	0.330345	0.330654	Vero	0.001	VSVG
25	Ver18_A3	0.332852	9.66e-05	0.332663	0.333041	Vero	0.001	VSVG
26	Ver18_A3	0.332239	0.000119647	0.332004	0.332473	Vero	0.001	VSVG
27	Ver18_A3	0.329151	0.000137545	0.328881	0.32942	Vero	0.001	VSVG
28	Ver18_A3	0.323828	0.000147898	0.323538	0.324118	Vero	0.001	VSVG
29	Ver18_A3	0.316509	0.000150701	0.316213	0.316804	Vero	0.001	VSVG
30	Ver18_A3	0.307434	0.000146757	0.307146	0.307721	Vero	0.001	VSVG
31	Ver18_A3	0.296842	0.00013729	0.296573	0.297111	Vero	0.001	VSVG
32	Ver18_A3	0.284973	0.000123936	0.28473	0.285216	Vero	0.001	VSVG
33	Ver18_A3	0.272066	0.000108949	0.271852	0.272279	Vero	0.001	VSVG
34	Ver18_A3	0.25836	9.56e-05	0.258173	0.258548	Vero	0.001	VSVG
35	Ver18_A3	0.244096	8.83e-05	0.243923	0.244269	Vero	0.001	VSVG
36	Ver18_A3	0.229513	9.1e-05	0.229334	0.229691	Vero	0.001	VSVG
37	Ver18_A3	0.214838	0.000103803	0.214634	0.215041	Vero	0.001	VSVG
0	Ver18_B1	0	0.143311	0	0.106296	Vero	0.001	VSVG
1	Ver18_B1	0	0.131507	0	0.0993617	Vero	0.001	VSVG
2	Ver18_B1	0	0.11973	0	0.0924784	Vero	0.001	VSVG
3	Ver18_B1	0	0.107986	0	0.0856632	Vero	0.001	VSVG
4	Ver18_B1	0	0.0962907	0	0.078941	Vero	0.001	VSVG
5	Ver18_B1	0	0.0846621	0	0.0723502	Vero	0.001	VSVG
6	Ver18_B1	0	0.0731326	0	0.0659537	Vero	0.001	VSVG
7	Ver18_B1	0	0.0617576	0	0.0598601	Vero	0.001	VSVG
8	Ver18_B1	0	0.0506416	0	0.0542739	Vero	0.001	VSVG
9	Ver18_B1	0	0.0400008	0	0.0496194	Vero	0.001	VSVG
10	Ver18_B1	0	0.0303396	0	0.0468848	Vero	0.001	VSVG
11	Ver18_B1	0.00365178	0.0229378	0	0.0486099	Vero	0.001	VSVG
12	Ver18_B1	0.0206679	0.0200925	0	0.0600492	Vero	0.001	VSVG
13	Ver18_B1	0.0399403	0.0212863	0	0.0816615	Vero	0.001	VSVG
14	Ver18_B1	0.0628921	0.0226687	0.0184616	0.107323	Vero	0.001	VSVG
15	Ver18_B1	0.0897306	0.0228378	0.0449686	0.134493	Vero	0.001	VSVG
16	Ver18_B1	0.119727	0.0226493	0.0753347	0.16412	Vero	0.001	VSVG
17	Ver18_B1	0.15213	0.0225806	0.107872	0.196388	Vero	0.001	VSVG
18	Ver18_B1	0.186186	0.0220952	0.142879	0.229492	Vero	0.001	VSVG
19	Ver18_B1	0.221052	0.0206309	0.180616	0.261489	Vero	0.001	VSVG
20	Ver18_B1	0.254774	0.0198111	0.215945	0.293604	Vero	0.001	VSVG
21	Ver18_B1	0.284647	0.0204461	0.244573	0.324722	Vero	0.001	VSVG
22	Ver18_B1	0.308282	0.0205862	0.267933	0.348631	Vero	0.001	VSVG
23	Ver18_B1	0.325601	0.0204693	0.285481	0.365721	Vero	0.001	VSVG
24	Ver18_B1	0.337517	0.0220017	0.294393	0.38064	Vero	0.001	VSVG
25	Ver18_B1	0.344945	0.0253439	0.295271	0.394619	Vero	0.001	VSVG
26	Ver18_B1	0.348705	0.0288014	0.292254	0.405156	Vero	0.001	VSVG
27	Ver18_B1	0.349214	0.0313003	0.287866	0.410563	Vero	0.001	VSVG
28	Ver18_B1	0.346784	0.0325752	0.282937	0.410632	Vero	0.001	VSVG
29	Ver18_B1	0.341726	0.03266	0.277712	0.405739	Vero	0.001	VSVG
30	Ver18_B1	0.334349	0.0317316	0.272155	0.396543	Vero	0.001	VSVG
31	Ver18_B1	0.324967	0.0300668	0.266036	0.383898	Vero	0.001	VSVG
32	Ver18_B1	0.313889	0.0280459	0.258919	0.368859	Vero	0.001	VSVG
33	Ver18_B1	0.301426	0.0261699	0.250133	0.35272	Vero	0.001	VSVG
34	Ver18_B1	0.287891	0.0250433	0.238806	0.336976	Vero	0.001	VSVG
35	Ver18_B1	0.273593	0.0252327	0.224137	0.323049	Vero	0.001	VSVG
36	Ver18_B1	0.258845	0.027006	0.205913	0.311776	Vero	0.001	VSVG
37	Ver18_B1	0.243947	0.0302037	0.184748	0.303147	Vero	0.001	VSVG
0	Ver20_A1	0	0.000187438	0	0	Vero	0.001	VSVG
1	Ver20_A1	0	0.000169777	0	0	Vero	0.001	VSVG
2	Ver20_A1	0	0.000152146	0	0	Vero	0.001	VSVG
3	Ver20_A1	0	0.000134556	0	0	Vero	0.001	VSVG
4	Ver20_A1	0	0.000117026	0	0	Vero	0.001	VSVG
5	Ver20_A1	0	9.96e-05	0	0	Vero	0.001	VSVG
6	Ver20_A1	0	8.23e-05	0	0	Vero	0.001	VSVG
7	Ver20_A1	0	6.53e-05	0	0	Vero	0.001	VSVG
8	Ver20_A1	0.00102616	4.88e-05	0.000930499	0.00112182	Vero	0.001	VSVG
9	Ver20_A1	0.00245749	3.37e-05	0.00239144	0.00252355	Vero	0.001	VSVG
10	Ver20_A1	0.00390523	2.29e-05	0.00386043	0.00395004	Vero	0.001	VSVG
11	Ver20_A1	0.00591381	2.21e-05	0.00587045	0.00595717	Vero	0.001	VSVG
12	Ver20_A1	0.00965612	2.64e-05	0.0096044	0.00970784	Vero	0.001	VSVG
13	Ver20_A1	0.0163375	2.58e-05	0.0162869	0.016388	Vero	0.001	VSVG
14	Ver20_A1	0.026647	2.07e-05	0.0266064	0.0266875	Vero	0.001	VSVG
15	Ver20_A1	0.040271	2.32e-05	0.0402255	0.0403165	Vero	0.001	VSVG
16	Ver20_A1	0.0567748	3.27e-05	0.0567108	0.0568388	Vero	0.001	VSVG
17	Ver20_A1	0.0756399	4.09e-05	0.0755599	0.07572	Vero	0.001	VSVG
18	Ver20_A1	0.0962861	4.61e-05	0.0961958	0.0963764	Vero	0.001	VSVG
19	Ver20_A1	0.118132	4.83e-05	0.118037	0.118226	Vero	0.001	VSVG
20	Ver20_A1	0.140595	4.8e-05	0.140501	0.140689	Vero	0.001	VSVG
21	Ver20_A1	0.163094	4.57e-05	0.163004	0.163183	Vero	0.001	VSVG
22	Ver20_A1	0.185047	4.2e-05	0.184965	0.185129	Vero	0.001	VSVG
23	Ver20_A1	0.205873	3.75e-05	0.205799	0.205947	Vero	0.001	VSVG
24	Ver20_A1	0.22499	3.32e-05	0.224925	0.225055	Vero	0.001	VSVG
25	Ver20_A1	0.241816	2.96e-05	0.241758	0.241874	Vero	0.001	VSVG
26	Ver20_A1	0.255769	2.74e-05	0.255715	0.255823	Vero	0.001	VSVG
27	Ver20_A1	0.266268	2.67e-05	0.266216	0.266321	Vero	0.001	VSVG
28	Ver20_A1	0.272736	2.67e-05	0.272684	0.272789	Vero	0.001	VSVG
29	Ver20_A1	0.27496	2.67e-05	0.274908	0.275013	Vero	0.001	VSVG
30	Ver20_A1	0.273345	2.63e-05	0.273294	0.273397	Vero	0.001	VSVG
31	Ver20_A1	0.268355	2.53e-05	0.268305	0.268405	Vero	0.001	VSVG
32	Ver20_A1	0.260455	2.4e-05	0.260407	0.260502	Vero	0.001	VSVG
33	Ver20_A1	0.250108	2.27e-05	0.250064	0.250152	Vero	0.001	VSVG
34	Ver20_A1	0.23778	2.17e-05	0.237737	0.237822	Vero	0.001	VSVG
35	Ver20_A1	0.223934	2.18e-05	0.223892	0.223977	Vero	0.001	VSVG
36	Ver20_A1	0.209036	2.31e-05	0.208991	0.209082	Vero	0.001	VSVG
37	Ver20_A1	0.19355	2.58e-05	0.1935	0.193601	Vero	0.001	VSVG
38	Ver20_A1	0.177909	2.94e-05	0.177852	0.177967	Vero	0.001	VSVG
0	Ver20_A3	0.00230706	0.000120163	0.00207154	0.00254258	Vero	0.001	VSVG
1	Ver20_A3	0.00206716	0.00010889	0.00185373	0.00228058	Vero	0.001	VSVG
2	Ver20_A3	0.00182725	9.76e-05	0.00163589	0.00201862	Vero	0.001	VSVG
3	Ver20_A3	0.00158735	8.64e-05	0.00141799	0.00175671	Vero	0.001	VSVG
4	Ver20_A3	0.00134744	7.52e-05	0.00120002	0.00149487	Vero	0.001	VSVG
5	Ver20_A3	0.00110754	6.41e-05	0.000981934	0.00123315	Vero	0.001	VSVG
6	Ver20_A3	0.000867637	5.3e-05	0.000763664	0.00097161	Vero	0.001	VSVG
7	Ver20_A3	0.000627733	4.22e-05	0.000545063	0.000710403	Vero	0.001	VSVG
8	Ver20_A3	0.000387829	3.17e-05	0.000325789	0.00044987	Vero	0.001	VSVG
9	Ver20_A3	0.000147926	2.2e-05	0.000104864	0.000190987	Vero	0.001	VSVG
10	Ver20_A3	0	1.49e-05	0	0	Vero	0.001	VSVG
11	Ver20_A3	0	1.41e-05	0	0	Vero	0.001	VSVG
12	Ver20_A3	0.000642507	1.69e-05	0.000609429	0.000675585	Vero	0.001	VSVG
13	Ver20_A3	0.00266237	1.67e-05	0.0026296	0.00269515	Vero	0.001	VSVG
14	Ver20_A3	0.00662678	1.33e-05	0.00660064	0.00665291	Vero	0.001	VSVG
15	Ver20_A3	0.013514	1.46e-05	0.0134853	0.0135426	Vero	0.001	VSVG
16	Ver20_A3	0.0242933	2.08e-05	0.0242525	0.0243341	Vero	0.001	VSVG
17	Ver20_A3	0.0389885	2.63e-05	0.038937	0.03904	Vero	0.001	VSVG
18	Ver20_A3	0.0568627	2.98e-05	0.0568043	0.0569211	Vero	0.001	VSVG
19	Ver20_A3	0.0771575	3.14e-05	0.0770961	0.077219	Vero	0.001	VSVG
20	Ver20_A3	0.0991146	3.12e-05	0.0990534	0.0991758	Vero	0.001	VSVG
21	Ver20_A3	0.121976	2.98e-05	0.121917	0.122034	Vero	0.001	VSVG
22	Ver20_A3	0.144982	2.74e-05	0.144928	0.145036	Vero	0.001	VSVG
23	Ver20_A3	0.167376	2.45e-05	0.167328	0.167424	Vero	0.001	VSVG
24	Ver20_A3	0.188398	2.16e-05	0.188356	0.18844	Vero	0.001	VSVG
25	Ver20_A3	0.207291	1.92e-05	0.207253	0.207329	Vero	0.001	VSVG
26	Ver20_A3	0.223296	1.76e-05	0.223261	0.22333	Vero	0.001	VSVG
27	Ver20_A3	0.235654	1.71e-05	0.235621	0.235688	Vero	0.001	VSVG
28	Ver20_A3	0.243612	1.71e-05	0.243578	0.243645	Vero	0.001	VSVG
29	Ver20_A3	0.246815	1.71e-05	0.246782	0.246849	Vero	0.001	VSVG
30	Ver20_A3	0.245697	1.69e-05	0.245664	0.24573	Vero	0.001	VSVG
31	Ver20_A3	0.240776	1.63e-05	0.240744	0.240808	Vero	0.001	VSVG
32	Ver20_A3	0.232575	1.54e-05	0.232544	0.232605	Vero	0.001	VSVG
33	Ver20_A3	0.221613	1.46e-05	0.221584	0.221642	Vero	0.001	VSVG
34	Ver20_A3	0.208412	1.4e-05	0.208385	0.208439	Vero	0.001	VSVG
35	Ver20_A3	0.193493	1.39e-05	0.193465	0.19352	Vero	0.001	VSVG
36	Ver20_A3	0.177375	1.48e-05	0.177346	0.177404	Vero	0.001	VSVG
37	Ver20_A3	0.160581	1.64e-05	0.160549	0.160613	Vero	0.001	VSVG
38	Ver20_A3	0.1436	1.88e-05	0.143564	0.143637	Vero	0.001	VSVG
0	Ver20_B1	0	0.000330823	0	0	Vero	0.001	VSVG
1	Ver20_B1	0	0.000300211	0	0	Vero	0.001	VSVG
2	Ver20_B1	0	0.000269647	0	0	Vero	0.001	VSVG
3	Ver20_B1	0	0.000239149	0	0	Vero	0.001	VSVG
4	Ver20_B1	0	0.000208745	0	0	Vero	0.001	VSVG
5	Ver20_B1	0	0.000178484	0	0	Vero	0.001	VSVG
6	Ver20_B1	0	0.000148453	0	0	Vero	0.001	VSVG
7	Ver20_B1	0	0.000118827	0	0	Vero	0.001	VSVG
8	Ver20_B1	0	9e-05	0	0	Vero	0.001	VSVG
9	Ver20_B1	0.000531532	6.31e-05	0.000407844	0.000655219	Vero	0.001	VSVG
10	Ver20_B1	0.0025024	4.2e-05	0.00242009	0.00258471	Vero	0.001	VSVG
11	Ver20_B1	0.00501795	3.7e-05	0.00494548	0.00509042	Vero	0.001	VSVG
12	Ver20_B1	0.00976648	4.43e-05	0.00967961	0.00985334	Vero	0.001	VSVG
13	Ver20_B1	0.0185833	4.55e-05	0.0184942	0.0186724	Vero	0.001	VSVG
14	Ver20_B1	0.0326216	3.64e-05	0.0325502	0.032693	Vero	0.001	VSVG
15	Ver20_B1	0.0505659	3.8e-05	0.0504915	0.0506404	Vero	0.001	VSVG
16	Ver20_B1	0.0705728	5.44e-05	0.0704661	0.0706794	Vero	0.001	VSVG
17	Ver20_B1	0.0915007	6.97e-05	0.0913641	0.0916374	Vero	0.001	VSVG
18	Ver20_B1	0.11291	7.98e-05	0.112754	0.113067	Vero	0.001	VSVG
19	Ver20_B1	0.134393	8.46e-05	0.134227	0.134559	Vero	0.001	VSVG
20	Ver20_B1	0.15554	8.46e-05	0.155374	0.155705	Vero	0.001	VSVG
21	Ver20_B1	0.175941	8.09e-05	0.175783	0.1761	Vero	0.001	VSVG
22	Ver20_B1	0.195189	7.46e-05	0.195043	0.195336	Vero	0.001	VSVG
23	Ver20_B1	0.212875	6.67e-05	0.212744	0.213006	Vero	0.001	VSVG
24	Ver20_B1	0.228589	5.87e-05	0.228474	0.228704	Vero	0.001	VSVG
25	Ver20_B1	0.241923	5.19e-05	0.241822	0.242025	Vero	0.001	VSVG
26	Ver20_B1	0.252468	4.75e-05	0.252375	0.252561	Vero	0.001	VSVG
27	Ver20_B1	0.259815	4.57e-05	0.259726	0.259905	Vero	0.001	VSVG
28	Ver20_B1	0.263556	4.57e-05	0.263467	0.263646	Vero	0.001	VSVG
29	Ver20_B1	0.263497	4.58e-05	0.263408	0.263587	Vero	0.001	VSVG
30	Ver20_B1	0.259972	4.53e-05	0.259883	0.26006	Vero	0.001	VSVG
31	Ver20_B1	0.253391	4.38e-05	0.253305	0.253477	Vero	0.001	VSVG
32	Ver20_B1	0.244167	4.17e-05	0.244086	0.244249	Vero	0.001	VSVG
33	Ver20_B1	0.232712	3.93e-05	0.232635	0.232789	Vero	0.001	VSVG
34	Ver20_B1	0.219438	3.75e-05	0.219364	0.219512	Vero	0.001	VSVG
35	Ver20_B1	0.204756	3.72e-05	0.204683	0.204829	Vero	0.001	VSVG
36	Ver20_B1	0.189079	3.91e-05	0.189003	0.189156	Vero	0.001	VSVG
37	Ver20_B1	0.172819	4.33e-05	0.172734	0.172904	Vero	0.001	VSVG
38	Ver20_B1	0.156373	4.94e-05	0.156276	0.15647	Vero	0.001	VSVG
0	Ver22_A1	0	0.000116242	0	0	Vero	0.001	VSVG
1	Ver22_A1	0	0.00010679	0	0	Vero	0.001	VSVG
2	Ver22_A1	0	9.74e-05	0	0	Vero	0.001	VSVG
3	Ver22_A1	0	8.8e-05	0	0	Vero	0.001	VSVG
4	Ver22_A1	0	7.86e-05	0	0	Vero	0.001	VSVG
5	Ver22_A1	0	6.93e-05	0	0	Vero	0.001	VSVG
6	Ver22_A1	0	6e-05	0	0	Vero	0.001	VSVG
7	Ver22_A1	0	5.09e-05	0	0	Vero	0.001	VSVG
8	Ver22_A1	0	4.19e-05	0	0	Vero	0.001	VSVG
9	Ver22_A1	0	3.33e-05	0	0	Vero	0.001	VSVG
10	Ver22_A1	0	2.54e-05	0	0	Vero	0.001	VSVG
11	Ver22_A1	0.0010051	1.91e-05	0.000967714	0.00104249	Vero	0.001	VSVG
12	Ver22_A1	0.00265157	1.62e-05	0.0026198	0.00268334	Vero	0.001	VSVG
13	Ver22_A1	0.00492433	1.77e-05	0.00488967	0.00495899	Vero	0.001	VSVG
14	Ver22_A1	0.00849434	2.06e-05	0.00845394	0.00853474	Vero	0.001	VSVG
15	Ver22_A1	0.0140326	2.2e-05	0.0139896	0.0140756	Vero	0.001	VSVG
16	Ver22_A1	0.0222101	2.01e-05	0.0221707	0.0222495	Vero	0.001	VSVG
17	Ver22_A1	0.0336355	1.57e-05	0.0336048	0.0336662	Vero	0.001	VSVG
18	Ver22_A1	0.0481941	1.49e-05	0.0481648	0.0482233	Vero	0.001	VSVG
19	Ver22_A1	0.0653039	1.86e-05	0.0652675	0.0653402	Vero	0.001	VSVG
20	Ver22_A1	0.0843052	1.93e-05	0.0842675	0.084343	Vero	0.001	VSVG
21	Ver22_A1	0.104195	1.68e-05	0.104162	0.104229	Vero	0.001	VSVG
22	Ver22_A1	0.123867	1.56e-05	0.123837	0.123898	Vero	0.001	VSVG
23	Ver22_A1	0.142214	1.86e-05	0.142177	0.14225	Vero	0.001	VSVG
24	Ver22_A1	0.158322	2.34e-05	0.158277	0.158368	Vero	0.001	VSVG
25	Ver22_A1	0.172145	2.76e-05	0.17209	0.172199	Vero	0.001	VSVG
26	Ver22_A1	0.18387	3.06e-05	0.18381	0.183929	Vero	0.001	VSVG
27	Ver22_A1	0.193687	3.21e-05	0.193624	0.19375	Vero	0.001	VSVG
28	Ver22_A1	0.201786	3.24e-05	0.201723	0.20185	Vero	0.001	VSVG
29	Ver22_A1	0.208357	3.15e-05	0.208295	0.208419	Vero	0.001	VSVG
30	Ver22_A1	0.213588	2.97e-05	0.21353	0.213646	Vero	0.001	VSVG
31	Ver22_A1	0.21767	2.71e-05	0.217617	0.217723	Vero	0.001	VSVG
32	Ver22_A1	0.220792	2.4e-05	0.220745	0.220839	Vero	0.001	VSVG
33	Ver22_A1	0.223143	2.1e-05	0.223102	0.223184	Vero	0.001	VSVG
34	Ver22_A1	0.224913	1.87e-05	0.224876	0.22495	Vero	0.001	VSVG
35	Ver22_A1	0.226291	1.77e-05	0.226257	0.226326	Vero	0.001	VSVG
36	Ver22_A1	0.227468	1.86e-05	0.227431	0.227504	Vero	0.001	VSVG
37	Ver22_A1	0.228606	2.13e-05	0.228564	0.228647	Vero	0.001	VSVG
0	Ver22_B1	0	9.21e-05	0	0	Vero	0.001	VSVG
1	Ver22_B1	0	8.48e-05	0	0	Vero	0.001	VSVG
2	Ver22_B1	0	7.75e-05	0	0	Vero	0.001	VSVG
3	Ver22_B1	0	7.02e-05	0	0	Vero	0.001	VSVG
4	Ver22_B1	0	6.29e-05	0	0	Vero	0.001	VSVG
5	Ver22_B1	0	5.56e-05	0	0	Vero	0.001	VSVG
6	Ver22_B1	0	4.84e-05	0	0	Vero	0.001	VSVG
7	Ver22_B1	0	4.13e-05	0	0	Vero	0.001	VSVG
8	Ver22_B1	0	3.43e-05	0	0	Vero	0.001	VSVG
9	Ver22_B1	0	2.75e-05	0	0	Vero	0.001	VSVG
10	Ver22_B1	0	2.12e-05	0	0	Vero	0.001	VSVG
11	Ver22_B1	0.00222742	1.58e-05	0.0021965	0.00225835	Vero	0.001	VSVG
12	Ver22_B1	0.00687402	1.26e-05	0.00684935	0.00689869	Vero	0.001	VSVG
13	Ver22_B1	0.0117899	1.29e-05	0.0117646	0.0118153	Vero	0.001	VSVG
14	Ver22_B1	0.017382	1.51e-05	0.0173523	0.0174117	Vero	0.001	VSVG
15	Ver22_B1	0.0240601	1.66e-05	0.0240276	0.0240926	Vero	0.001	VSVG
16	Ver22_B1	0.0322339	1.57e-05	0.0322032	0.0322647	Vero	0.001	VSVG
17	Ver22_B1	0.0422952	1.25e-05	0.0422708	0.0423196	Vero	0.001	VSVG
18	Ver22_B1	0.0542481	1.11e-05	0.0542262	0.0542699	Vero	0.001	VSVG
19	Ver22_B1	0.0677256	1.38e-05	0.0676985	0.0677527	Vero	0.001	VSVG
20	Ver22_B1	0.0823082	1.48e-05	0.0822791	0.0823373	Vero	0.001	VSVG
21	Ver22_B1	0.0972968	1.31e-05	0.097271	0.0973225	Vero	0.001	VSVG
22	Ver22_B1	0.111867	1.18e-05	0.111844	0.11189	Vero	0.001	VSVG
23	Ver22_B1	0.125194	1.38e-05	0.125167	0.125221	Vero	0.001	VSVG
24	Ver22_B1	0.136553	1.75e-05	0.136519	0.136588	Vero	0.001	VSVG
25	Ver22_B1	0.145864	2.08e-05	0.145823	0.145905	Vero	0.001	VSVG
26	Ver22_B1	0.153292	2.32e-05	0.153246	0.153337	Vero	0.001	VSVG
27	Ver22_B1	0.159004	2.46e-05	0.158956	0.159053	Vero	0.001	VSVG
28	Ver22_B1	0.163169	2.5e-05	0.16312	0.163218	Vero	0.001	VSVG
29	Ver22_B1	0.165953	2.44e-05	0.165905	0.166001	Vero	0.001	VSVG
30	Ver22_B1	0.167524	2.31e-05	0.167479	0.167569	Vero	0.001	VSVG
31	Ver22_B1	0.168049	2.12e-05	0.168007	0.16809	Vero	0.001	VSVG
32	Ver22_B1	0.167695	1.89e-05	0.167658	0.167732	Vero	0.001	VSVG
33	Ver22_B1	0.16663	1.65e-05	0.166598	0.166663	Vero	0.001	VSVG
34	Ver22_B1	0.165022	1.46e-05	0.164993	0.16505	Vero	0.001	VSVG
35	Ver22_B1	0.163036	1.36e-05	0.16301	0.163063	Vero	0.001	VSVG
36	Ver22_B1	0.160842	1.4e-05	0.160815	0.160869	Vero	0.001	VSVG
37	Ver22_B1	0.158594	1.58e-05	0.158563	0.158625	Vero	0.001	VSVG
0	Ver23_A1	0	0.000134203	0	0	Vero	0.001	VSVG
1	Ver23_A1	0	0.000122175	0	0	Vero	0.001	VSVG
2	Ver23_A1	0	0.000110164	0	0	Vero	0.001	VSVG
3	Ver23_A1	0	9.82e-05	0	0	Vero	0.001	VSVG
4	Ver23_A1	0	8.62e-05	0	0	Vero	0.001	VSVG
5	Ver23_A1	0	7.43e-05	0	0	Vero	0.001	VSVG
6	Ver23_A1	0	6.25e-05	0	0	Vero	0.001	VSVG
7	Ver23_A1	0	5.08e-05	0	0	Vero	0.001	VSVG
8	Ver23_A1	0	3.93e-05	0	0	Vero	0.001	VSVG
9	Ver23_A1	0	2.84e-05	0	0	Vero	0.001	VSVG
10	Ver23_A1	0.000188479	1.9e-05	0.000151333	0.000225626	Vero	0.001	VSVG
11	Ver23_A1	0.00141775	1.43e-05	0.0013898	0.00144571	Vero	0.001	VSVG
12	Ver23_A1	0.00269429	1.63e-05	0.00266237	0.00272621	Vero	0.001	VSVG
13	Ver23_A1	0.00406875	1.84e-05	0.00403261	0.00410488	Vero	0.001	VSVG
14	Ver23_A1	0.00566887	1.66e-05	0.00563636	0.00570138	Vero	0.001	VSVG
15	Ver23_A1	0.00803948	1.43e-05	0.00801137	0.00806759	Vero	0.001	VSVG
16	Ver23_A1	0.0118658	1.71e-05	0.0118323	0.0118992	Vero	0.001	VSVG
17	Ver23_A1	0.0177676	2.23e-05	0.017724	0.0178112	Vero	0.001	VSVG
18	Ver23_A1	0.0257626	2.64e-05	0.0257109	0.0258143	Vero	0.001	VSVG
19	Ver23_A1	0.0355439	2.88e-05	0.0354875	0.0356003	Vero	0.001	VSVG
20	Ver23_A1	0.0468015	2.96e-05	0.0467435	0.0468595	Vero	0.001	VSVG
21	Ver23_A1	0.0592252	2.91e-05	0.0591681	0.0592823	Vero	0.001	VSVG
22	Ver23_A1	0.0725052	2.78e-05	0.0724507	0.0725596	Vero	0.001	VSVG
23	Ver23_A1	0.0863312	2.59e-05	0.0862804	0.0863821	Vero	0.001	VSVG
24	Ver23_A1	0.100393	2.4e-05	0.100346	0.10044	Vero	0.001	VSVG
25	Ver23_A1	0.114381	2.24e-05	0.114338	0.114425	Vero	0.001	VSVG
26	Ver23_A1	0.127986	2.11e-05	0.127944	0.128027	Vero	0.001	VSVG
27	Ver23_A1	0.140896	2e-05	0.140856	0.140935	Vero	0.001	VSVG
28	Ver23_A1	0.152802	1.9e-05	0.152764	0.152839	Vero	0.001	VSVG
29	Ver23_A1	0.163405	1.76e-05	0.163371	0.16344	Vero	0.001	VSVG
30	Ver23_A1	0.172613	1.59e-05	0.172582	0.172644	Vero	0.001	VSVG
31	Ver23_A1	0.180504	1.44e-05	0.180476	0.180532	Vero	0.001	VSVG
32	Ver23_A1	0.187161	1.41e-05	0.187133	0.187189	Vero	0.001	VSVG
33	Ver23_A1	0.192668	1.51e-05	0.192638	0.192698	Vero	0.001	VSVG
34	Ver23_A1	0.197109	1.72e-05	0.197075	0.197142	Vero	0.001	VSVG
35	Ver23_A1	0.200566	1.96e-05	0.200528	0.200605	Vero	0.001	VSVG
36	Ver23_A1	0.203113	2.16e-05	0.20307	0.203155	Vero	0.001	VSVG
37	Ver23_A1	0.204808	2.32e-05	0.204762	0.204853	Vero	0.001	VSVG
38	Ver23_A1	0.205711	2.42e-05	0.205663	0.205758	Vero	0.001	VSVG
39	Ver23_A1	0.205881	2.47e-05	0.205832	0.205929	Vero	0.001	VSVG
40	Ver23_A1	0.205378	2.47e-05	0.205329	0.205426	Vero	0.001	VSVG
41	Ver23_A1	0.204261	2.42e-05	0.204213	0.204308	Vero	0.001	VSVG
42	Ver23_A1	0.202589	2.33e-05	0.202543	0.202635	Vero	0.001	VSVG
43	Ver23_A1	0.200422	2.21e-05	0.200378	0.200465	Vero	0.001	VSVG
44	Ver23_A1	0.197818	2.07e-05	0.197778	0.197859	Vero	0.001	VSVG
45	Ver23_A1	0.194838	1.93e-05	0.194801	0.194876	Vero	0.001	VSVG
46	Ver23_A1	0.191541	1.8e-05	0.191506	0.191576	Vero	0.001	VSVG
47	Ver23_A1	0.187986	1.7e-05	0.187952	0.188019	Vero	0.001	VSVG
48	Ver23_A1	0.184231	1.66e-05	0.184199	0.184264	Vero	0.001	VSVG
49	Ver23_A1	0.180338	1.69e-05	0.180305	0.180371	Vero	0.001	VSVG
50	Ver23_A1	0.176364	1.79e-05	0.176329	0.176399	Vero	0.001	VSVG
51	Ver23_A1	0.172367	1.96e-05	0.172328	0.172405	Vero	0.001	VSVG
0	Ver23_B1	0	9.79e-05	0	0	Vero	0.001	VSVG
1	Ver23_B1	0	8.93e-05	0	0	Vero	0.001	VSVG
2	Ver23_B1	0	8.08e-05	0	0	Vero	0.001	VSVG
3	Ver23_B1	0	7.23e-05	0	0	Vero	0.001	VSVG
4	Ver23_B1	0	6.38e-05	0	0	Vero	0.001	VSVG
5	Ver23_B1	0	5.54e-05	0	0	Vero	0.001	VSVG
6	Ver23_B1	0	4.69e-05	0	0	Vero	0.001	VSVG
7	Ver23_B1	0.000246552	3.86e-05	0.000170902	0.000322203	Vero	0.001	VSVG
8	Ver23_B1	0.000594876	3.04e-05	0.000535331	0.00065442	Vero	0.001	VSVG
9	Ver23_B1	0.000943199	2.24e-05	0.000899228	0.000987169	Vero	0.001	VSVG
10	Ver23_B1	0.00129152	1.52e-05	0.00126174	0.0013213	Vero	0.001	VSVG
11	Ver23_B1	0.00164452	1.03e-05	0.00162438	0.00166466	Vero	0.001	VSVG
12	Ver23_B1	0.00208169	1.05e-05	0.00206115	0.00210224	Vero	0.001	VSVG
13	Ver23_B1	0.00274271	1.25e-05	0.00271821	0.0027672	Vero	0.001	VSVG
14	Ver23_B1	0.00378586	1.2e-05	0.00376244	0.00380929	Vero	0.001	VSVG
15	Ver23_B1	0.00556628	1e-05	0.0055466	0.00558597	Vero	0.001	VSVG
16	Ver23_B1	0.00856605	1.1e-05	0.00854441	0.00858769	Vero	0.001	VSVG
17	Ver23_B1	0.0132525	1.46e-05	0.013224	0.0132811	Vero	0.001	VSVG
18	Ver23_B1	0.0197341	1.77e-05	0.0196995	0.0197688	Vero	0.001	VSVG
19	Ver23_B1	0.0277757	1.96e-05	0.0277373	0.0278142	Vero	0.001	VSVG
20	Ver23_B1	0.0371282	2.04e-05	0.0370882	0.0371682	Vero	0.001	VSVG
21	Ver23_B1	0.0475426	2.02e-05	0.047503	0.0475823	Vero	0.001	VSVG
22	Ver23_B1	0.05877	1.94e-05	0.0587321	0.0588079	Vero	0.001	VSVG
23	Ver23_B1	0.0705613	1.81e-05	0.0705258	0.0705968	Vero	0.001	VSVG
24	Ver23_B1	0.0826675	1.68e-05	0.0826347	0.0827004	Vero	0.001	VSVG
25	Ver23_B1	0.0948397	1.55e-05	0.0948092	0.0948701	Vero	0.001	VSVG
26	Ver23_B1	0.106829	1.46e-05	0.1068	0.106857	Vero	0.001	VSVG
27	Ver23_B1	0.118386	1.39e-05	0.118359	0.118413	Vero	0.001	VSVG
28	Ver23_B1	0.129262	1.32e-05	0.129236	0.129287	Vero	0.001	VSVG
29	Ver23_B1	0.139212	1.22e-05	0.139188	0.139236	Vero	0.001	VSVG
30	Ver23_B1	0.148123	1.11e-05	0.148102	0.148145	Vero	0.001	VSVG
31	Ver23_B1	0.156043	1.01e-05	0.156024	0.156063	Vero	0.001	VSVG
32	Ver23_B1	0.163026	9.66e-06	0.163007	0.163045	Vero	0.001	VSVG
33	Ver23_B1	0.169127	1.02e-05	0.169107	0.169147	Vero	0.001	VSVG
34	Ver23_B1	0.174402	1.16e-05	0.174379	0.174424	Vero	0.001	VSVG
35	Ver23_B1	0.178905	1.32e-05	0.178879	0.178931	Vero	0.001	VSVG
36	Ver23_B1	0.182688	1.47e-05	0.18266	0.182717	Vero	0.001	VSVG
37	Ver23_B1	0.185799	1.58e-05	0.185768	0.18583	Vero	0.001	VSVG
38	Ver23_B1	0.188284	1.66e-05	0.188251	0.188316	Vero	0.001	VSVG
39	Ver23_B1	0.190188	1.7e-05	0.190155	0.190221	Vero	0.001	VSVG
40	Ver23_B1	0.191558	1.7e-05	0.191525	0.191592	Vero	0.001	VSVG
41	Ver23_B1	0.192441	1.67e-05	0.192408	0.192474	Vero	0.001	VSVG
42	Ver23_B1	0.192883	1.61e-05	0.192851	0.192914	Vero	0.001	VSVG
43	Ver23_B1	0.192929	1.53e-05	0.192899	0.192959	Vero	0.001	VSVG
44	Ver23_B1	0.192627	1.44e-05	0.192599	0.192655	Vero	0.001	VSVG
45	Ver23_B1	0.192022	1.34e-05	0.191996	0.192049	Vero	0.001	VSVG
46	Ver23_B1	0.191162	1.25e-05	0.191137	0.191186	Vero	0.001	VSVG
47	Ver23_B1	0.190091	1.18e-05	0.190068	0.190114	Vero	0.001	VSVG
48	Ver23_B1	0.188857	1.14e-05	0.188834	0.188879	Vero	0.001	VSVG
49	Ver23_B1	0.187505	1.15e-05	0.187483	0.187528	Vero	0.001	VSVG
50	Ver23_B1	0.186083	1.22e-05	0.186059	0.186107	Vero	0.001	VSVG
51	Ver23_B1	0.184635	1.32e-05	0.184609	0.184661	Vero	0.001	VSVG
0	Ver26_A1	0	0.0411049	0	0	Vero	0.001	VSVG
1	Ver26_A1	0	0.0379496	0	0	Vero	0.001	VSVG
2	Ver26_A1	0	0.0348022	0	0.000202262	Vero	0.001	VSVG
3	Ver26_A1	0	0.0316649	0	0.00158285	Vero	0.001	VSVG
4	Ver26_A1	0	0.0285414	0	0.00299013	Vero	0.001	VSVG
5	Ver26_A1	0	0.0254364	0	0.00443393	Vero	0.001	VSVG
6	Ver26_A1	0	0.0223579	0	0.00592947	Vero	0.001	VSVG
7	Ver26_A1	0	0.0193183	0	0.00750151	Vero	0.001	VSVG
8	Ver26_A1	0	0.0163396	0	0.00919275	Vero	0.001	VSVG
9	Ver26_A1	0	0.0134622	0	0.0110824	Vero	0.001	VSVG
10	Ver26_A1	0	0.0107674	0	0.0133303	Vero	0.001	VSVG
11	Ver26_A1	0	0.00843248	0	0.0162833	Vero	0.001	VSVG
12	Ver26_A1	0.00733838	0.00683432	0	0.0207337	Vero	0.001	VSVG
13	Ver26_A1	0.0152517	0.00630607	0.00289176	0.0276116	Vero	0.001	VSVG
14	Ver26_A1	0.0238315	0.00642403	0.0112405	0.0364226	Vero	0.001	VSVG
15	Ver26_A1	0.0333127	0.00654321	0.020488	0.0461374	Vero	0.001	VSVG
16	Ver26_A1	0.0435802	0.00671775	0.0304134	0.056747	Vero	0.001	VSVG
17	Ver26_A1	0.0544442	0.00716189	0.0404069	0.0684815	Vero	0.001	VSVG
18	Ver26_A1	0.0657146	0.0077928	0.0504407	0.0809885	Vero	0.001	VSVG
19	Ver26_A1	0.077209	0.00829743	0.060946	0.093472	Vero	0.001	VSVG
20	Ver26_A1	0.0887782	0.00853898	0.0720418	0.105515	Vero	0.001	VSVG
21	Ver26_A1	0.100282	0.0085499	0.0835245	0.11704	Vero	0.001	VSVG
22	Ver26_A1	0.111581	0.00842373	0.0950708	0.128092	Vero	0.001	VSVG
23	Ver26_A1	0.122535	0.00827209	0.106322	0.138749	Vero	0.001	VSVG
24	Ver26_A1	0.133004	0.00819137	0.116949	0.149059	Vero	0.001	VSVG
25	Ver26_A1	0.142849	0.00823131	0.126715	0.158982	Vero	0.001	VSVG
26	Ver26_A1	0.151928	0.00837636	0.13551	0.168345	Vero	0.001	VSVG
27	Ver26_A1	0.160102	0.00855221	0.14334	0.176865	Vero	0.001	VSVG
28	Ver26_A1	0.167232	0.00865295	0.150272	0.184192	Vero	0.001	VSVG
29	Ver26_A1	0.173223	0.00859598	0.156375	0.190071	Vero	0.001	VSVG
30	Ver26_A1	0.178117	0.00839652	0.16166	0.194574	Vero	0.001	VSVG
31	Ver26_A1	0.181981	0.00811797	0.16607	0.197892	Vero	0.001	VSVG
32	Ver26_A1	0.184882	0.00784426	0.169507	0.200257	Vero	0.001	VSVG
33	Ver26_A1	0.186886	0.00766237	0.171868	0.201905	Vero	0.001	VSVG
34	Ver26_A1	0.188062	0.0076394	0.173088	0.203035	Vero	0.001	VSVG
35	Ver26_A1	0.188475	0.00779903	0.173188	0.203761	Vero	0.001	VSVG
36	Ver26_A1	0.188192	0.00811176	0.172293	0.204091	Vero	0.001	VSVG
37	Ver26_A1	0.187281	0.00850592	0.17061	0.203953	Vero	0.001	VSVG
38	Ver26_A1	0.185809	0.00888944	0.168386	0.203232	Vero	0.001	VSVG
39	Ver26_A1	0.18384	0.00917262	0.165861	0.201818	Vero	0.001	VSVG
40	Ver26_A1	0.181418	0.00931261	0.163166	0.199671	Vero	0.001	VSVG
41	Ver26_A1	0.178581	0.00930492	0.160343	0.196819	Vero	0.001	VSVG
42	Ver26_A1	0.175363	0.00916172	0.157406	0.19332	Vero	0.001	VSVG
43	Ver26_A1	0.171799	0.00890754	0.15434	0.189258	Vero	0.001	VSVG
44	Ver26_A1	0.167925	0.00857791	0.151112	0.184738	Vero	0.001	VSVG
45	Ver26_A1	0.163777	0.00821944	0.147666	0.179887	Vero	0.001	VSVG
46	Ver26_A1	0.159389	0.00788981	0.143925	0.174853	Vero	0.001	VSVG
47	Ver26_A1	0.154798	0.00765544	0.139793	0.169802	Vero	0.001	VSVG
48	Ver26_A1	0.150038	0.00758354	0.135174	0.164902	Vero	0.001	VSVG
49	Ver26_A1	0.145145	0.00772779	0.129999	0.160292	Vero	0.001	VSVG
50	Ver26_A1	0.140155	0.00811312	0.124254	0.156057	Vero	0.001	VSVG
51	Ver26_A1	0.135103	0.00873019	0.117992	0.152214	Vero	0.001	VSVG
52	Ver26_A1	0.130025	0.00954334	0.11132	0.14873	Vero	0.001	VSVG
0	Ver26_B1	0	0.0382917	0	0	Vero	0.001	VSVG
1	Ver26_B1	0	0.035361	0	0	Vero	0.001	VSVG
2	Ver26_B1	0	0.0324364	0	0	Vero	0.001	VSVG
3	Ver26_B1	0	0.0295195	0	0	Vero	0.001	VSVG
4	Ver26_B1	0	0.0266129	0	0	Vero	0.001	VSVG
5	Ver26_B1	0	0.0237205	0	0	Vero	0.001	VSVG
6	Ver26_B1	0	0.0208481	0	0.00206856	Vero	0.001	VSVG
7	Ver26_B1	0	0.0180053	0	0.00430716	Vero	0.001	VSVG
8	Ver26_B1	0	0.0152086	0	0.0066363	Vero	0.001	VSVG
9	Ver26_B1	0	0.0124893	0	0.00911689	Vero	0.001	VSVG
10	Ver26_B1	0	0.00991099	0	0.011874	Vero	0.001	VSVG
11	Ver26_B1	0.000258981	0.00761838	0	0.015191	Vero	0.001	VSVG
12	Ver26_B1	0.00809402	0.0059528	0	0.0197615	Vero	0.001	VSVG
13	Ver26_B1	0.0162036	0.00535958	0.00569883	0.0267084	Vero	0.001	VSVG
14	Ver26_B1	0.0249593	0.00551697	0.0141461	0.0357726	Vero	0.001	VSVG
15	Ver26_B1	0.0346688	0.00564069	0.0236131	0.0457245	Vero	0.001	VSVG
16	Ver26_B1	0.0452491	0.00570586	0.0340656	0.0564326	Vero	0.001	VSVG
17	Ver26_B1	0.0564724	0.00602748	0.0446585	0.0682862	Vero	0.001	VSVG
18	Ver26_B1	0.0681107	0.00661545	0.0551445	0.081077	Vero	0.001	VSVG
19	Ver26_B1	0.0799435	0.00714551	0.0659383	0.0939487	Vero	0.001	VSVG
20	Ver26_B1	0.0917966	0.00742375	0.0772461	0.106347	Vero	0.001	VSVG
21	Ver26_B1	0.103514	0.00745785	0.0888966	0.118131	Vero	0.001	VSVG
22	Ver26_B1	0.11494	0.00732889	0.100575	0.129304	Vero	0.001	VSVG
23	Ver26_B1	0.125918	0.00714482	0.111914	0.139921	Vero	0.001	VSVG
24	Ver26_B1	0.136292	0.00700894	0.122554	0.150029	Vero	0.001	VSVG
25	Ver26_B1	0.145906	0.00698754	0.132211	0.159602	Vero	0.001	VSVG
26	Ver26_B1	0.154605	0.00708437	0.14072	0.168491	Vero	0.001	VSVG
27	Ver26_B1	0.162232	0.00723923	0.148044	0.176421	Vero	0.001	VSVG
28	Ver26_B1	0.168632	0.00735219	0.154222	0.183042	Vero	0.001	VSVG
29	Ver26_B1	0.173691	0.00733186	0.15932	0.188061	Vero	0.001	VSVG
30	Ver26_B1	0.177476	0.007175	0.163413	0.191539	Vero	0.001	VSVG
31	Ver26_B1	0.180102	0.0069308	0.166518	0.193687	Vero	0.001	VSVG
32	Ver26_B1	0.181684	0.00667109	0.168609	0.19476	Vero	0.001	VSVG
33	Ver26_B1	0.182337	0.00647553	0.169645	0.195029	Vero	0.001	VSVG
34	Ver26_B1	0.182175	0.0064118	0.169608	0.194742	Vero	0.001	VSVG
35	Ver26_B1	0.181313	0.00651248	0.168548	0.194077	Vero	0.001	VSVG
36	Ver26_B1	0.179865	0.00676141	0.166612	0.193117	Vero	0.001	VSVG
37	Ver26_B1	0.177946	0.00709998	0.16403	0.191862	Vero	0.001	VSVG
38	Ver26_B1	0.175671	0.00744694	0.161075	0.190267	Vero	0.001	VSVG
39	Ver26_B1	0.17315	0.00771914	0.158021	0.18828	Vero	0.001	VSVG
40	Ver26_B1	0.170438	0.00787012	0.155013	0.185864	Vero	0.001	VSVG
41	Ver26_B1	0.167551	0.00789172	0.152083	0.183019	Vero	0.001	VSVG
42	Ver26_B1	0.164503	0.00779164	0.149232	0.179775	Vero	0.001	VSVG
43	Ver26_B1	0.161309	0.00758869	0.146436	0.176183	Vero	0.001	VSVG
44	Ver26_B1	0.157984	0.00731117	0.143654	0.172314	Vero	0.001	VSVG
45	Ver26_B1	0.154543	0.00699687	0.140829	0.168256	Vero	0.001	VSVG
46	Ver26_B1	0.150999	0.0066934	0.13788	0.164118	Vero	0.001	VSVG
47	Ver26_B1	0.147368	0.00645707	0.134712	0.160024	Vero	0.001	VSVG
48	Ver26_B1	0.143665	0.00634751	0.131224	0.156106	Vero	0.001	VSVG
49	Ver26_B1	0.139904	0.00641613	0.127329	0.15248	Vero	0.001	VSVG
50	Ver26_B1	0.136101	0.00669167	0.122985	0.149216	Vero	0.001	VSVG
51	Ver26_B1	0.132269	0.00717235	0.118211	0.146327	Vero	0.001	VSVG
52	Ver26_B1	0.128424	0.00783056	0.113076	0.143771	Vero	0.001	VSVG
0	Ver28_A1	0	0.000312732	0	0	Vero	0.001	VSVG
1	Ver28_A1	0	0.000286426	0	0	Vero	0.001	VSVG
2	Ver28_A1	0	0.000260152	0	0	Vero	0.001	VSVG
3	Ver28_A1	0	0.000233922	0	0	Vero	0.001	VSVG
4	Ver28_A1	0	0.000207753	0	0	Vero	0.001	VSVG
5	Ver28_A1	0	0.00018167	0	0	Vero	0.001	VSVG
6	Ver28_A1	0	0.000155717	0	0	Vero	0.001	VSVG
7	Ver28_A1	0	0.000129971	0	0	Vero	0.001	VSVG
8	Ver28_A1	0	0.000104586	0	0	Vero	0.001	VSVG
9	Ver28_A1	0	7.99e-05	0	0	Vero	0.001	VSVG
10	Ver28_A1	0.000112925	5.69e-05	1.48e-06	0.000224374	Vero	0.001	VSVG
11	Ver28_A1	0.00449508	3.85e-05	0.00441962	0.00457054	Vero	0.001	VSVG
12	Ver28_A1	0.00902684	3.3e-05	0.00896215	0.00909153	Vero	0.001	VSVG
13	Ver28_A1	0.0142404	3.89e-05	0.0141641	0.0143167	Vero	0.001	VSVG
14	Ver28_A1	0.0207285	4.14e-05	0.0206473	0.0208097	Vero	0.001	VSVG
15	Ver28_A1	0.0290769	3.61e-05	0.0290061	0.0291476	Vero	0.001	VSVG
16	Ver28_A1	0.0398145	3.66e-05	0.0397428	0.0398863	Vero	0.001	VSVG
17	Ver28_A1	0.0534441	4.13e-05	0.0533632	0.053525	Vero	0.001	VSVG
18	Ver28_A1	0.0702809	3.44e-05	0.0702135	0.0703483	Vero	0.001	VSVG
19	Ver28_A1	0.088817	3.36e-05	0.0887511	0.088883	Vero	0.001	VSVG
20	Ver28_A1	0.106588	5.07e-05	0.106489	0.106687	Vero	0.001	VSVG
21	Ver28_A1	0.122439	6.55e-05	0.12231	0.122567	Vero	0.001	VSVG
22	Ver28_A1	0.136372	7.36e-05	0.136228	0.136517	Vero	0.001	VSVG
23	Ver28_A1	0.148432	7.56e-05	0.148284	0.14858	Vero	0.001	VSVG
24	Ver28_A1	0.15866	7.25e-05	0.158518	0.158802	Vero	0.001	VSVG
25	Ver28_A1	0.1671	6.6e-05	0.166971	0.16723	Vero	0.001	VSVG
26	Ver28_A1	0.173795	5.78e-05	0.173681	0.173908	Vero	0.001	VSVG
27	Ver28_A1	0.178787	4.98e-05	0.178689	0.178884	Vero	0.001	VSVG
28	Ver28_A1	0.182119	4.39e-05	0.182033	0.182205	Vero	0.001	VSVG
29	Ver28_A1	0.183834	4.12e-05	0.183753	0.183915	Vero	0.001	VSVG
30	Ver28_A1	0.183975	4.07e-05	0.183896	0.184055	Vero	0.001	VSVG
31	Ver28_A1	0.18263	4.05e-05	0.182551	0.18271	Vero	0.001	VSVG
32	Ver28_A1	0.180014	3.95e-05	0.179936	0.180091	Vero	0.001	VSVG
33	Ver28_A1	0.176362	3.79e-05	0.176288	0.176437	Vero	0.001	VSVG
34	Ver28_A1	0.171913	3.6e-05	0.171843	0.171984	Vero	0.001	VSVG
35	Ver28_A1	0.166903	3.48e-05	0.166835	0.166971	Vero	0.001	VSVG
36	Ver28_A1	0.161569	3.48e-05	0.161501	0.161637	Vero	0.001	VSVG
37	Ver28_A1	0.156148	3.63e-05	0.156077	0.156219	Vero	0.001	VSVG
38	Ver28_A1	0.150877	3.88e-05	0.1508	0.150953	Vero	0.001	VSVG
39	Ver28_A1	0.14599	4.16e-05	0.145909	0.146072	Vero	0.001	VSVG
40	Ver28_A1	0.141622	4.39e-05	0.141536	0.141708	Vero	0.001	VSVG
41	Ver28_A1	0.137747	4.53e-05	0.137658	0.137836	Vero	0.001	VSVG
42	Ver28_A1	0.134327	4.59e-05	0.134237	0.134417	Vero	0.001	VSVG
43	Ver28_A1	0.131322	4.56e-05	0.131233	0.131411	Vero	0.001	VSVG
44	Ver28_A1	0.128695	4.45e-05	0.128608	0.128782	Vero	0.001	VSVG
45	Ver28_A1	0.126406	4.28e-05	0.126322	0.12649	Vero	0.001	VSVG
46	Ver28_A1	0.124418	4.07e-05	0.124338	0.124497	Vero	0.001	VSVG
47	Ver28_A1	0.12269	3.85e-05	0.122615	0.122766	Vero	0.001	VSVG
48	Ver28_A1	0.121186	3.65e-05	0.121114	0.121257	Vero	0.001	VSVG
49	Ver28_A1	0.119865	3.51e-05	0.119797	0.119934	Vero	0.001	VSVG
50	Ver28_A1	0.118691	3.48e-05	0.118622	0.118759	Vero	0.001	VSVG
51	Ver28_A1	0.117623	3.58e-05	0.117553	0.117693	Vero	0.001	VSVG
52	Ver28_A1	0.116623	3.81e-05	0.116548	0.116698	Vero	0.001	VSVG
53	Ver28_A1	0.115653	4.16e-05	0.115571	0.115734	Vero	0.001	VSVG
0	Ver28_B1	0	0.0579388	0	0	Vero	0.001	VSVG
1	Ver28_B1	0	0.0535588	0	0	Vero	0.001	VSVG
2	Ver28_B1	0	0.0491898	0	0	Vero	0.001	VSVG
3	Ver28_B1	0	0.0448351	0	0	Vero	0.001	VSVG
4	Ver28_B1	0	0.0404993	0	0	Vero	0.001	VSVG
[truncated: 20,160 more rows]

## Sheet: D-Susceptibles-Fit
time_elapsed	proportion	se_prop	lwr_prop	upr_prop	cell_type	MOI	virus
[truncated: 2,430 more rows]
