# Supplementary material for: Accelerated viral dynamics in bat cell lines, with implications for zoonotic emergence
Source: eLife journal article supplement (doi:10.7554/elife.48401), 2020-02-03
Supplement: supp [file elife-48401-supp-v1.zip › elife_poa_e48401_Supplementary_file_3.docx]

**Supplementary File 3.** Special Points from Bifurcation Analysis

| **Special Point** | **ε** |  | **β** | **PI** |
| --- | --- | --- | --- | --- |
| Branch Point | 0 | .01 | 0.176 | 0 |
| Hopf | 0 | .01 | 1.76 | 0.0133 |
| Branch Point | 0.0001 | .01 | 0.193 | 0 |
| Hopf | 0.0001 | .01 | 2.747 | 0.00944 |
| Branch Point✝ | 0.0025 | .01 | 0.615 | 0 |
| Branch Point | 0.0001 | 0 | 0.193 | 0 |
| Hopf | 0.0001 | 0 | 1.407 | 0.0156 |
| Branch Point | 0.0001 | .1 | 0.193 | 0 |
| Hopf | 0.0001 | .1 | 16.918 | 0.00178 |
| Branch Point✝ | 0.0001 | 1 | 0.193 | 0 |
| Note: All other parameters in this bifurcation analysis were fixed at the following values: *b* =.025 ;; ; ;  ✝For these scenarios with high antiviral rates (either induced, , or constitutive, ε), no Hopf bifurcation was observed. | | | | |
