# Supplementary material for: Accelerated viral dynamics in bat cell lines, with implications for zoonotic emergence
Source: eLife journal article supplement (doi:10.7554/elife.48401), 2020-02-03
Supplement: supp [file elife-48401-supp-v1.zip › elife_poa_e48401_Supplementary_file_6.docx]

**Supplementary File 6.** Primers for qPCR

| **Species** | **Cell Line** | **Gene** | **Primer** | **Sequence** | **Original Publication** |
| --- | --- | --- | --- | --- | --- |
| ***Rousettus aegyptiacus*** | RoNi/7.1 | β-Actin | Fwd | GGCTCCCAGCACAATGAAGA | Biesold *et al.*, 2011 | |
| Rev | GGAGCCGCCGATCCA | Biesold *et al.*, 2011 | |
| IFN-α | Fwd | GAGACTCCCCTGCTGGATGA | Cowled *et al.*, 2011 | |
| Rev | ATAGAGGGTGATTCTCTGGAAGTATTTC | Cowled *et al.*, 2011 | |
| IFN-β | Fwd | CAGCTATTTCCATGAGCTACAACTTG | Biesold *et al.*, 2011 | |
| Rev | TTAACTGCCACAGGAGCTTCAG | Biesold *et al.*, 2011 | |
| *Pteropus alecto* | PaKiT01 | β-Actin | Fwd | GGCTCCCAGCACAATGAAGA | Biesold *et al.*, 2011 | |
| Rev | GGAGCCGCCGATCCA | Biesold *et al.*, 2011 | |
| IFN-α | Fwd | GAGACTCCCCTGCTGGATGA | Cowled *et al.*, 2011 | |
| Rev | ATAGAGGGTGATTCTCTGGAAGTATTTC | Cowled *et al.*, 2011 | |
| IFN-β | Fwd | CTCTAGCACTGGCTGGAATGAA | Cowled *et al.*, 2011 | |
| Rev | TGCCCACCGAGTGTCTCA | Cowled *et al.*, 2011 | |
