# Supplementary figures and images for: Accelerated viral dynamics in bat cell lines, with implications for zoonotic emergence
Source: eLife journal article supplement (doi:10.7554/elife.48401), 2020-02-03

## A. Absent Immunity

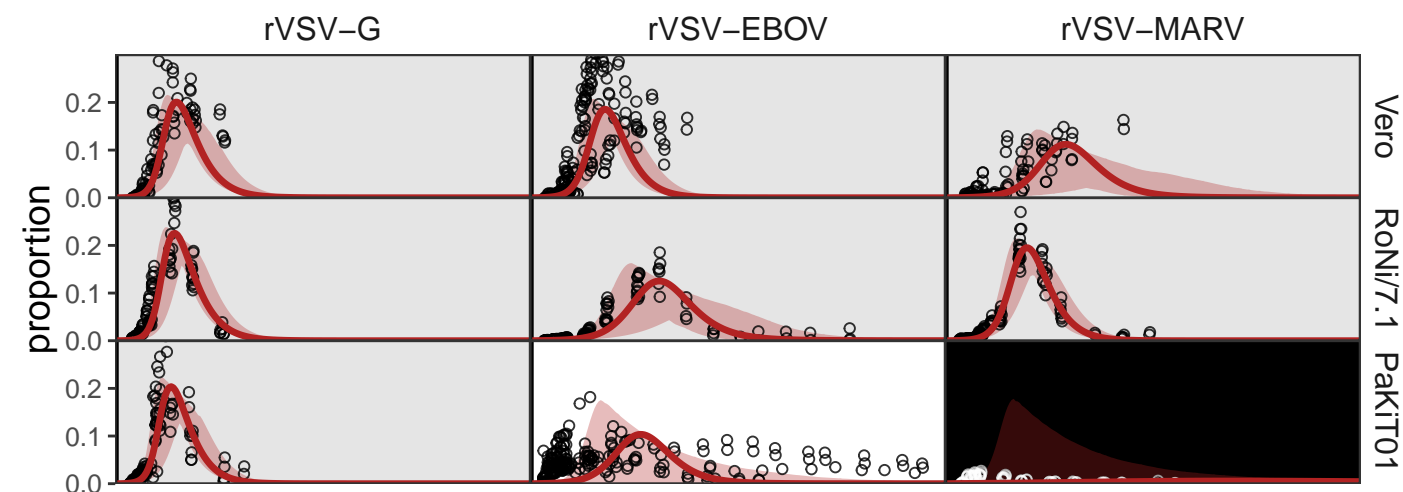

## B. Induced Immunity

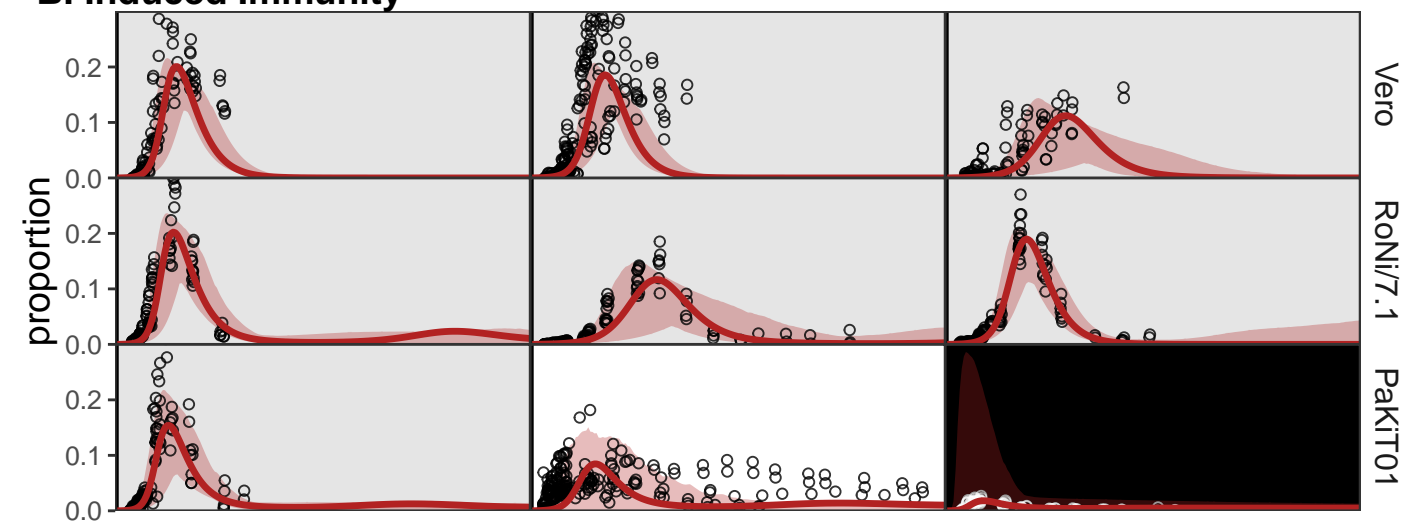

## C. Constitutive Immunity

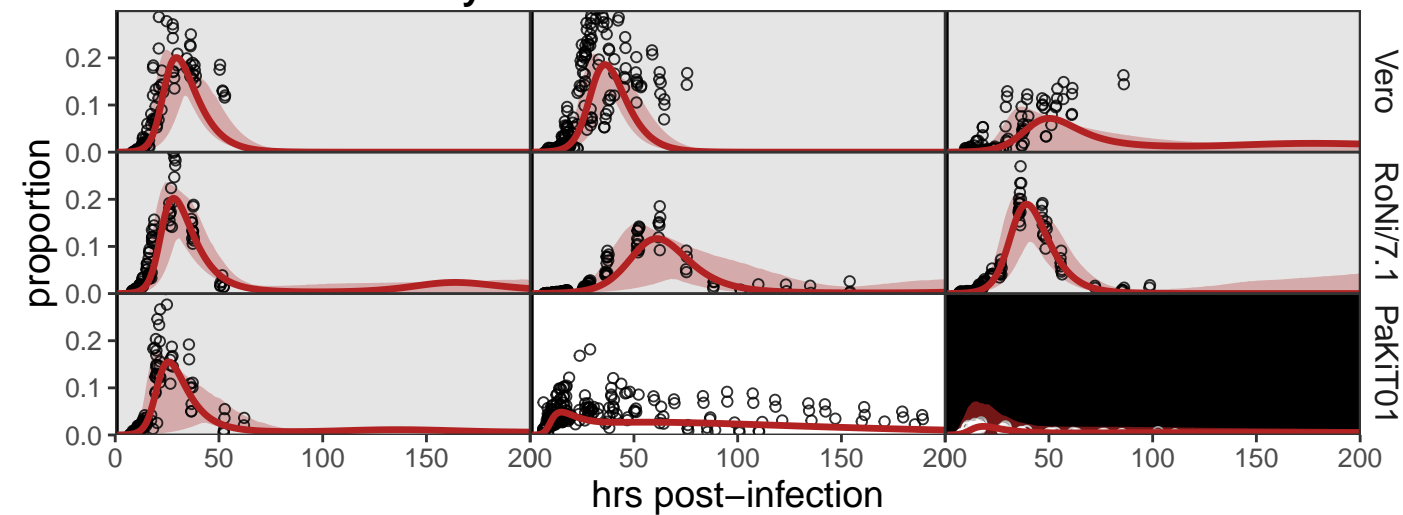

Supplement: supp [file elife-48401-supp-v1.zip › elife_poa_e48401_Figure_1_figure_supplement_4.pdf]

## A. IFN- $\alpha$

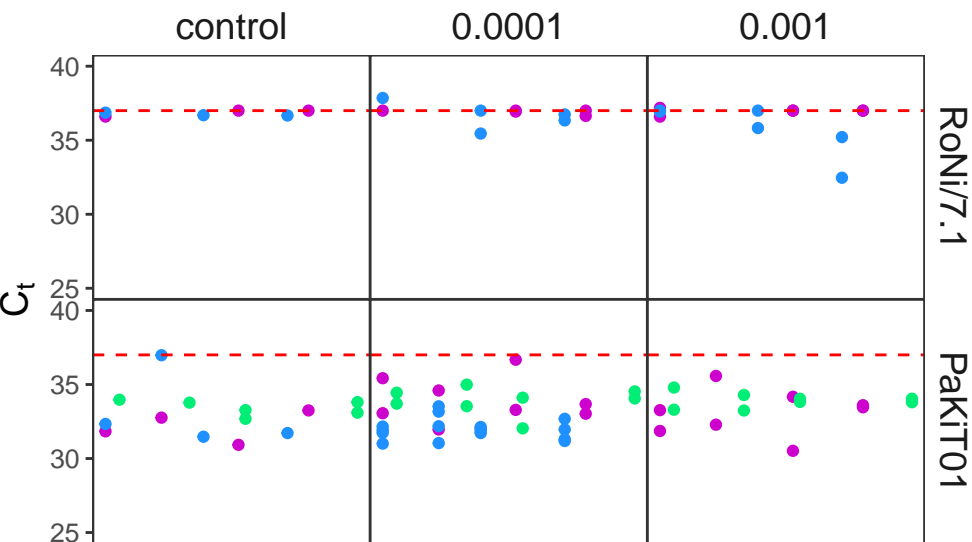

## B. IFN- $\beta$

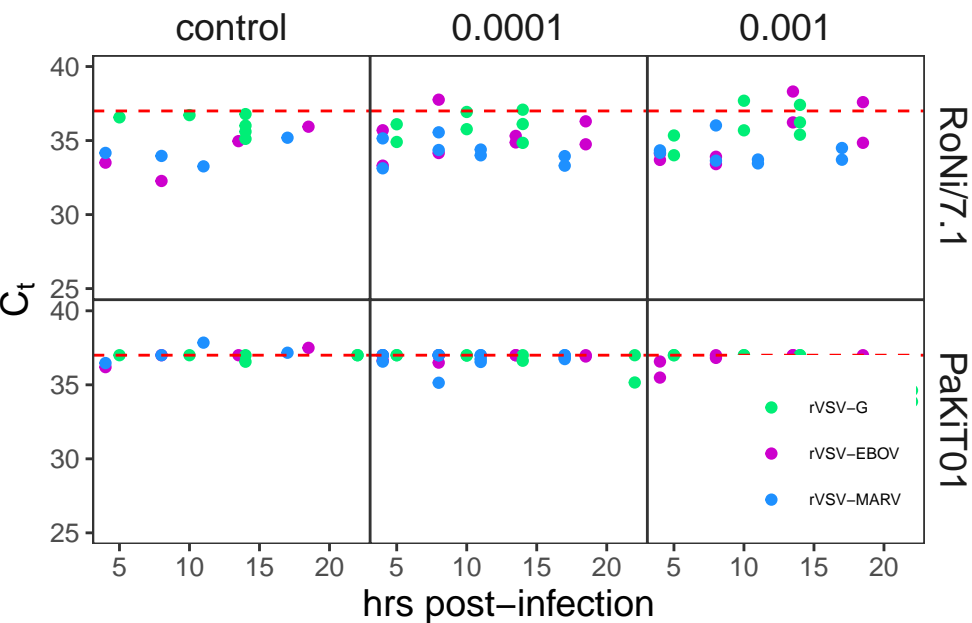

Supplement: supp [file elife-48401-supp-v1.zip › elife_poa_e48401_Figure_1_figure_supplement_6.pdf]

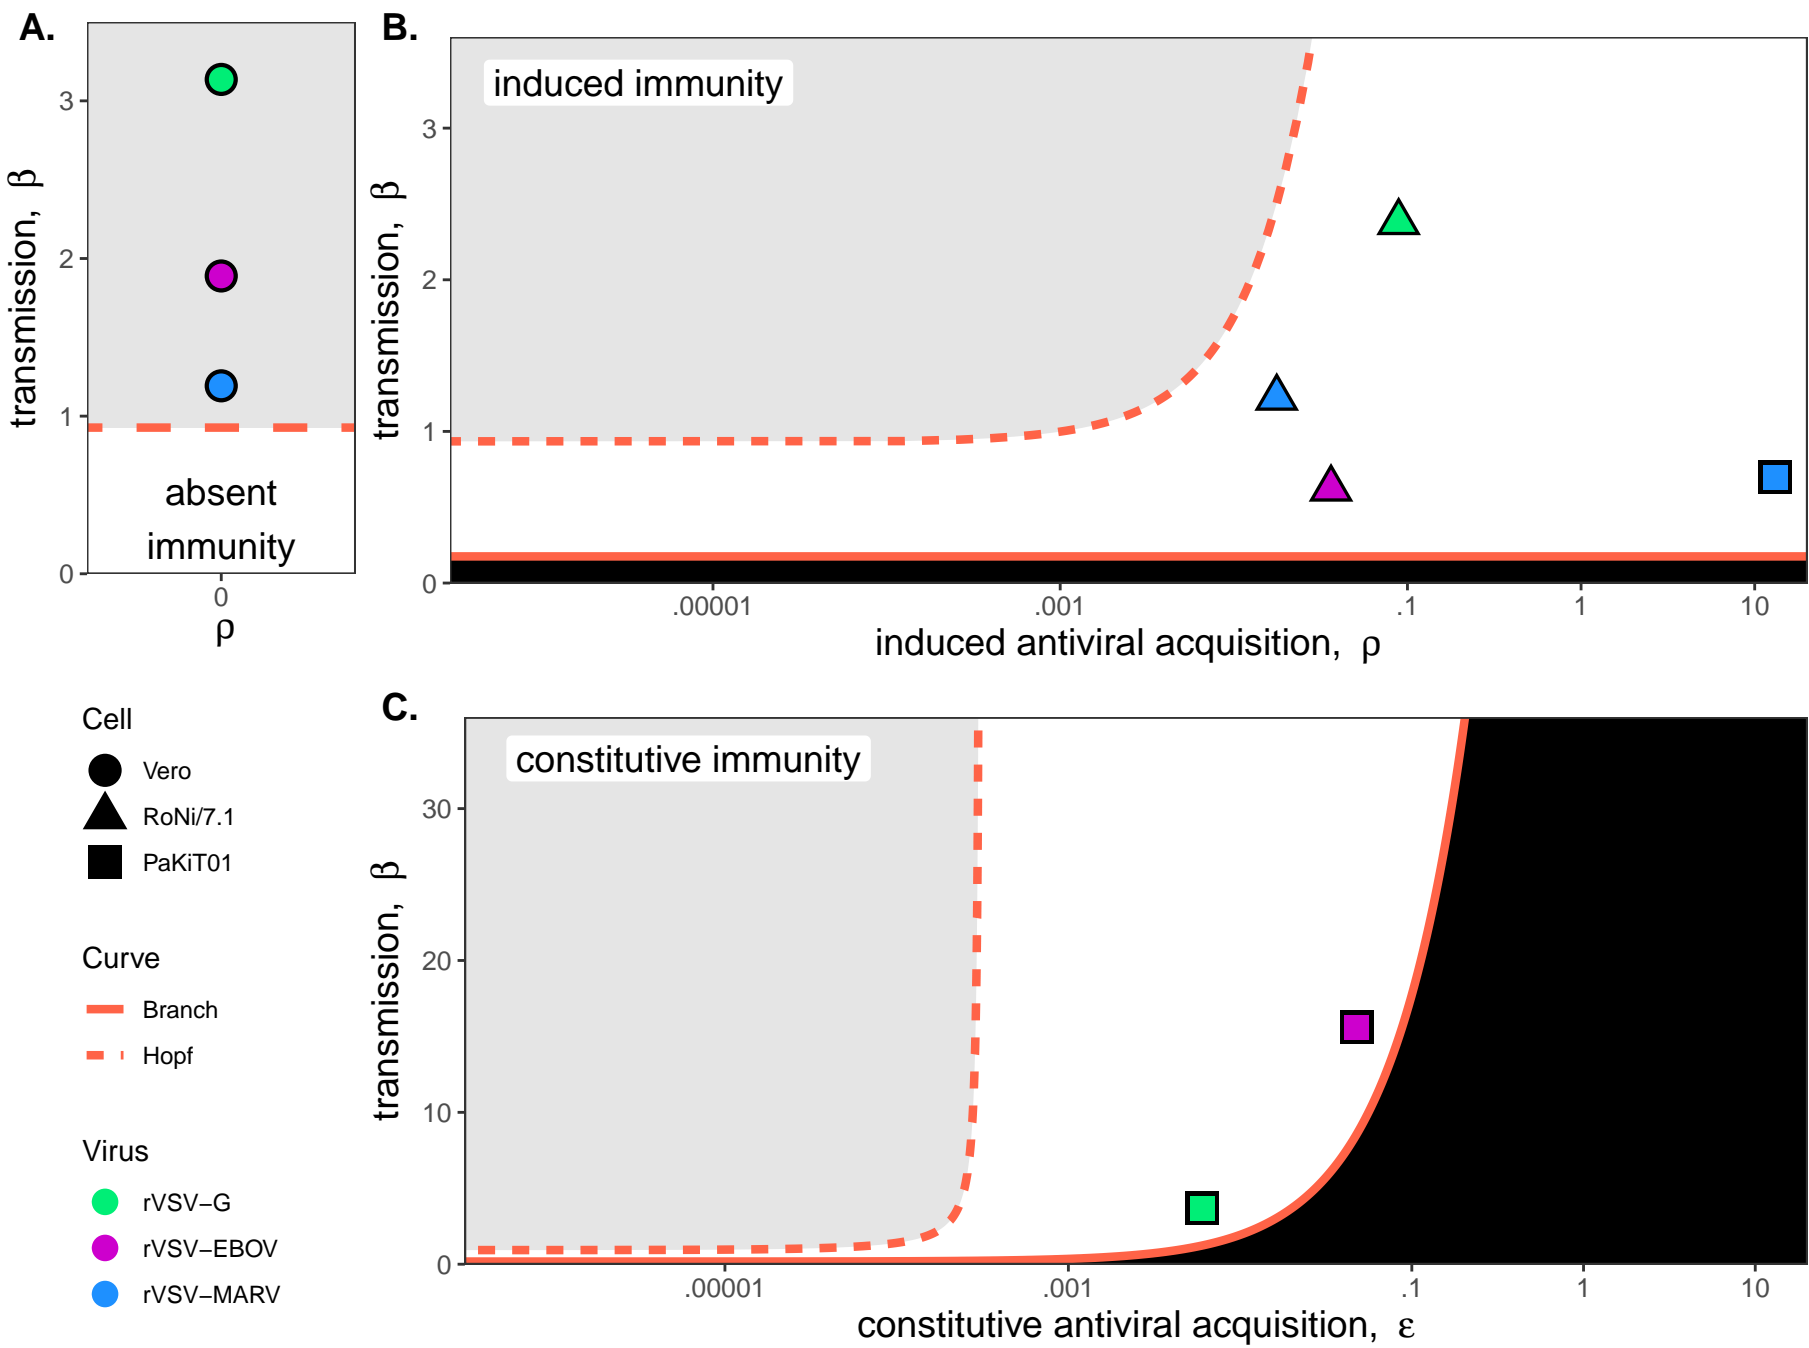

Supplement: supp [file elife-48401-supp-v1.zip › elife_poa_e48401_Figure_4_figure_supplement_1.pdf]

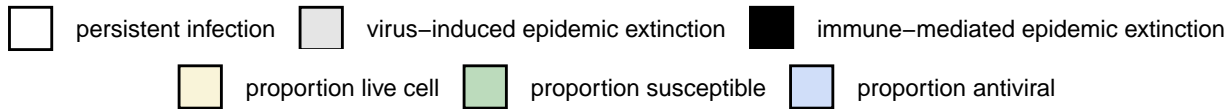

## A. Absent Immunity

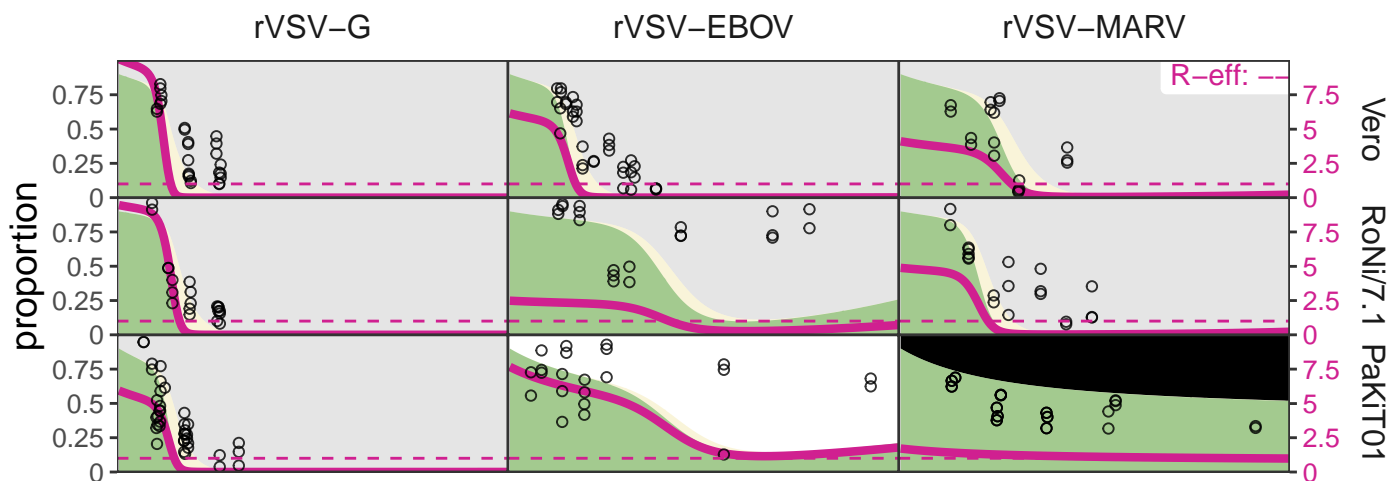

## B. Induced Immunity

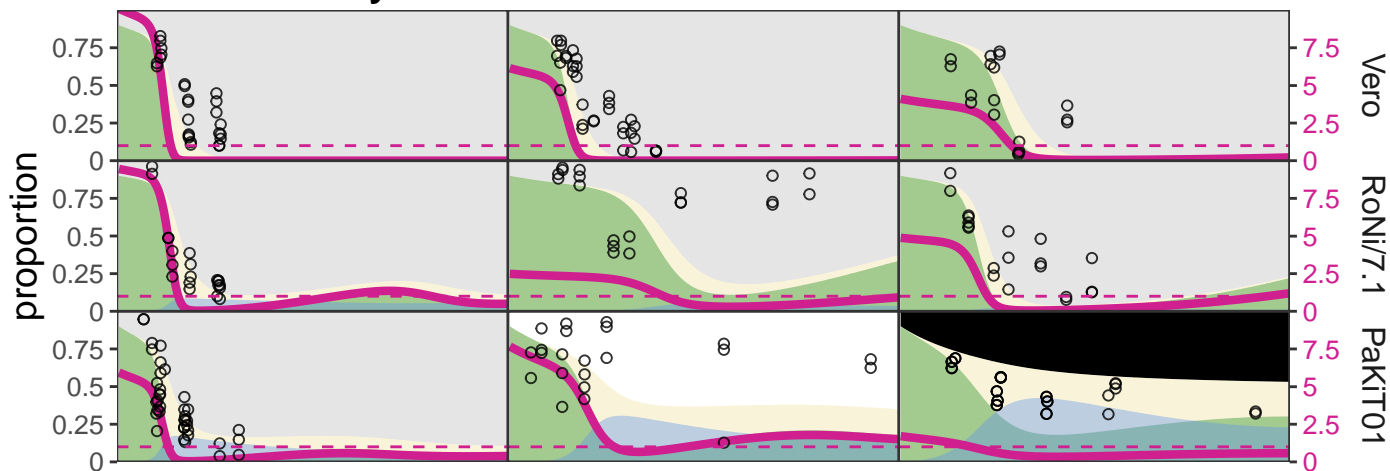

## C. Constitutive Immunity

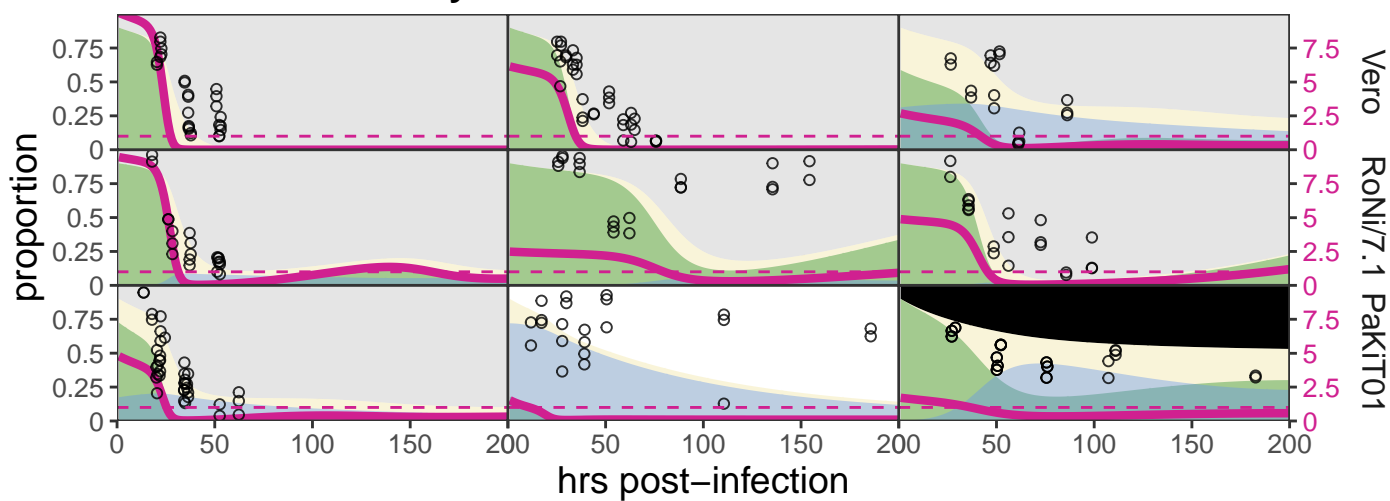

Supplement: supp [file elife-48401-supp-v1.zip › elife_poa_e48401_Figure_5_figure_supplement_2.pdf]

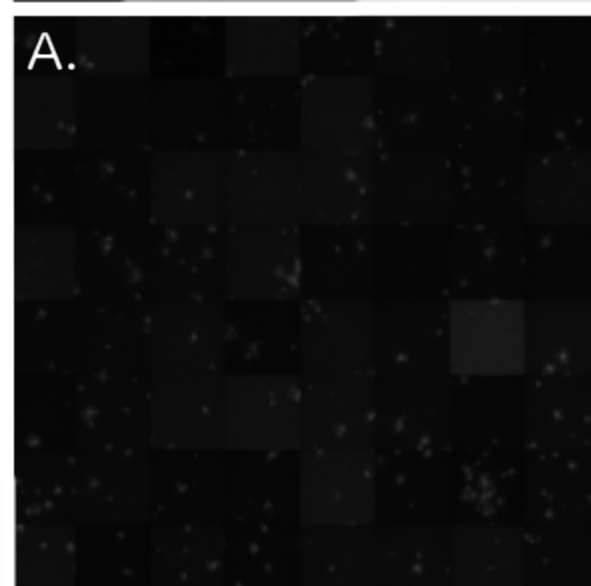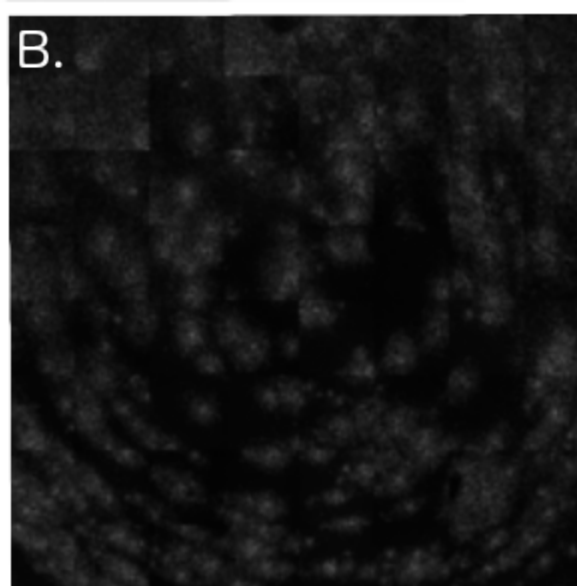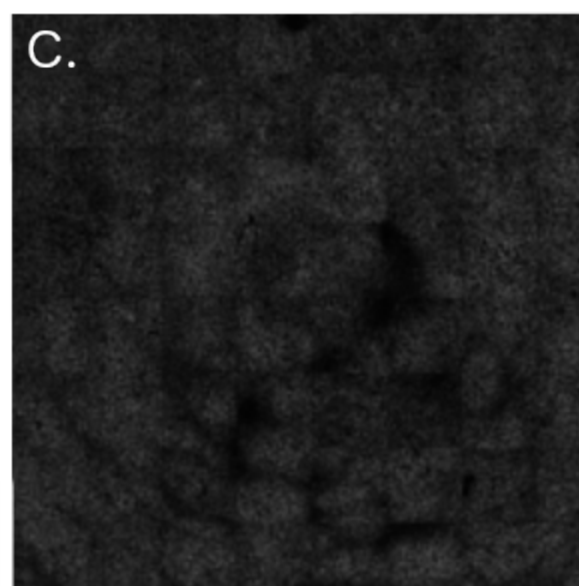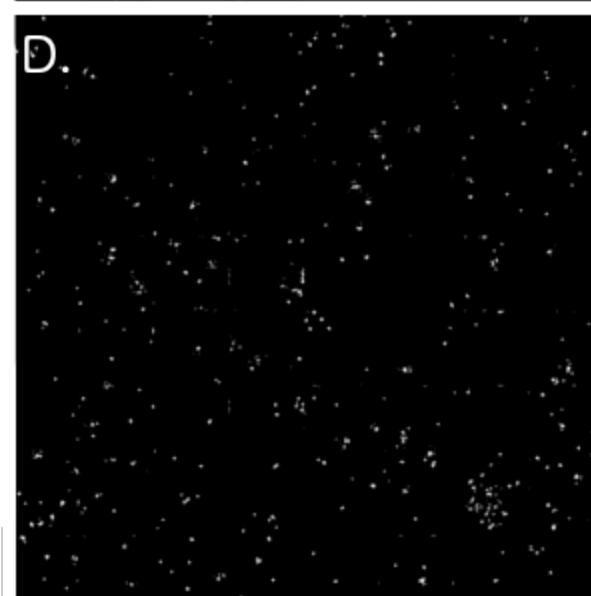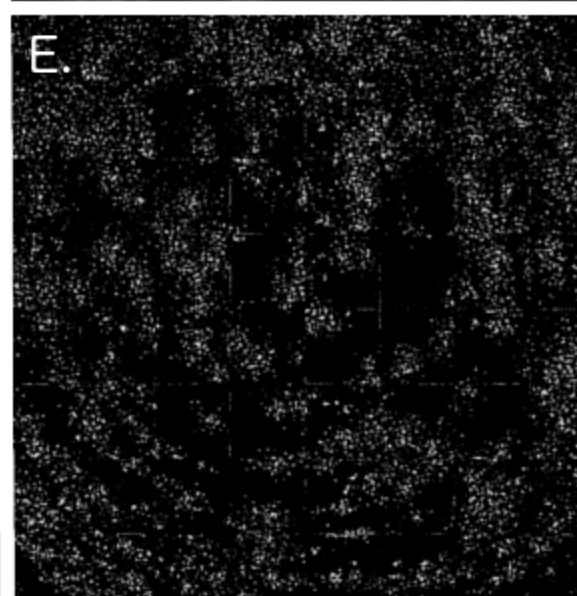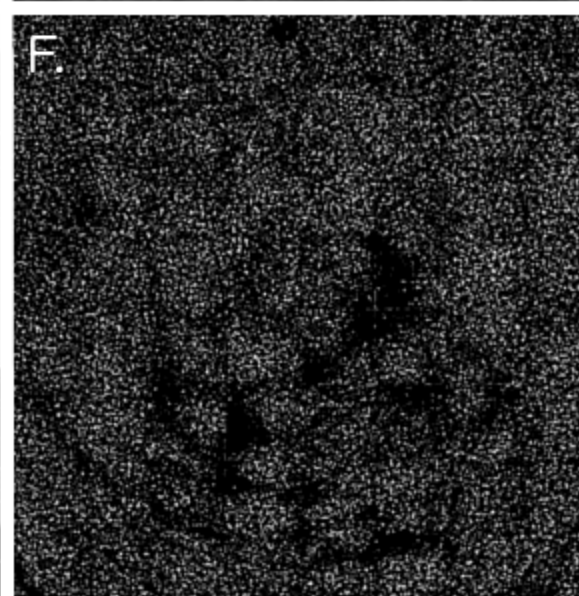

Supplement: supp [file elife-48401-supp-v1.zip › elife_poa_e48401_Figure_1_figure_supplement_1.pdf]



## A. Absent Immunity

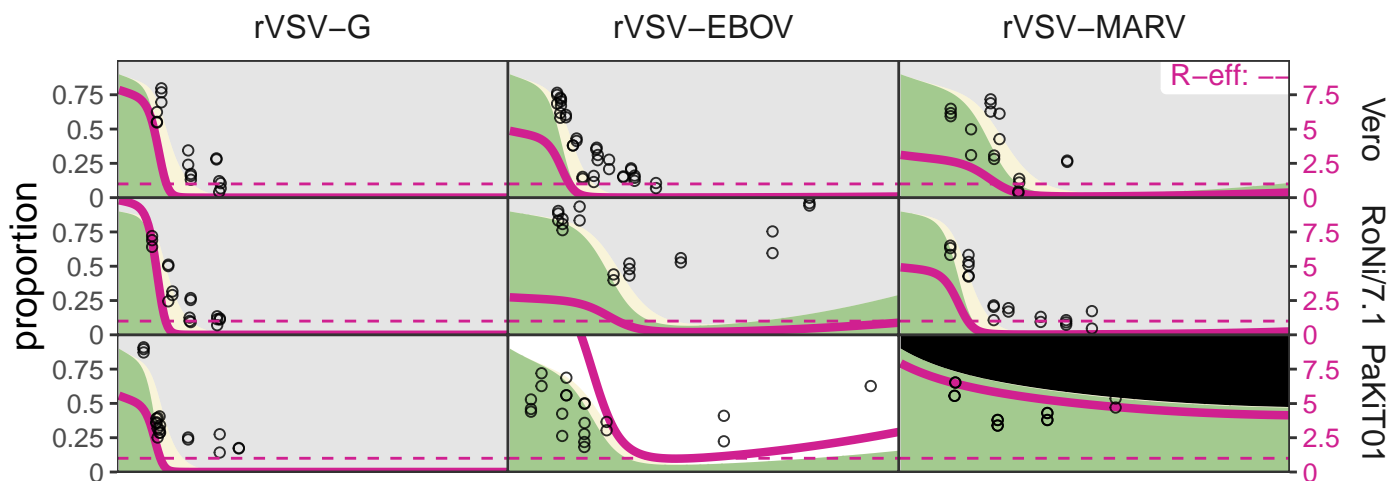

## B. Induced Immunity

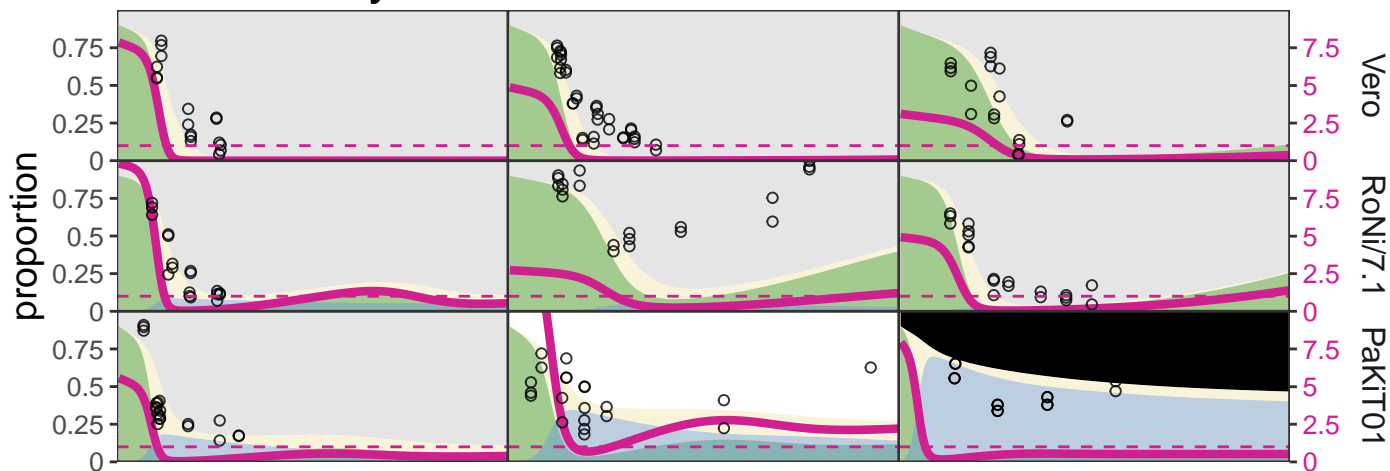

## C. Constitutive Immunity

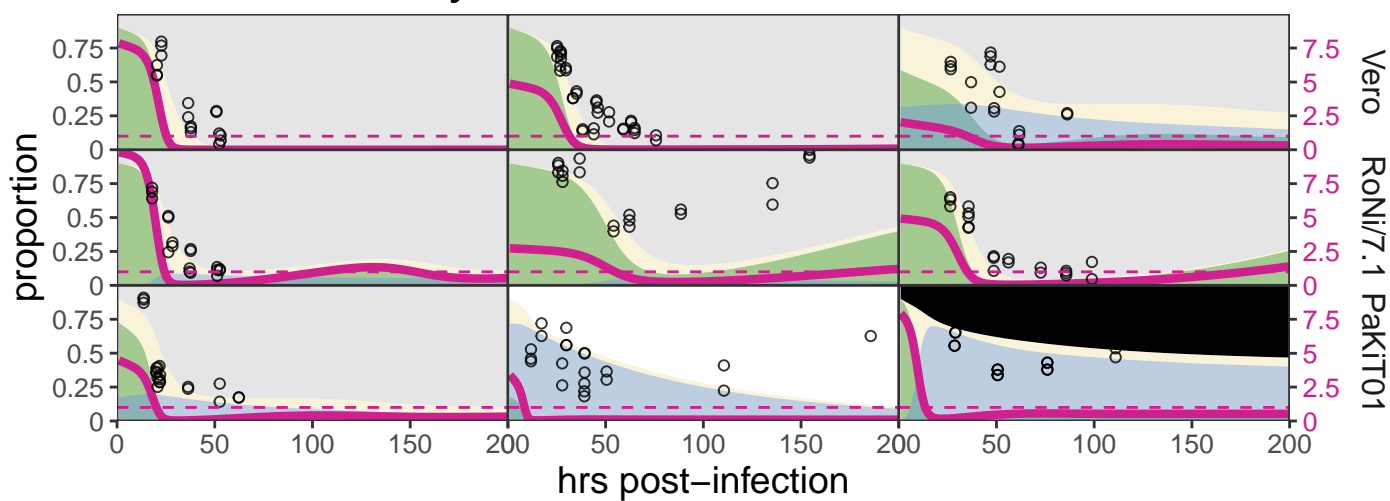

Supplement: supp [file elife-48401-supp-v1.zip › elife_poa_e48401_Figure_5_figure_supplement_1.pdf]

Vero

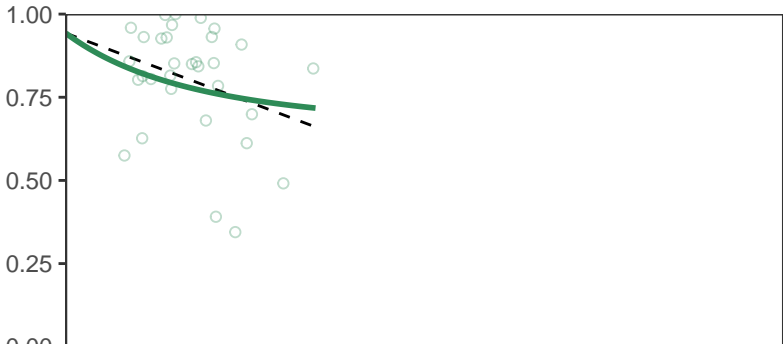

RoNi/7.1

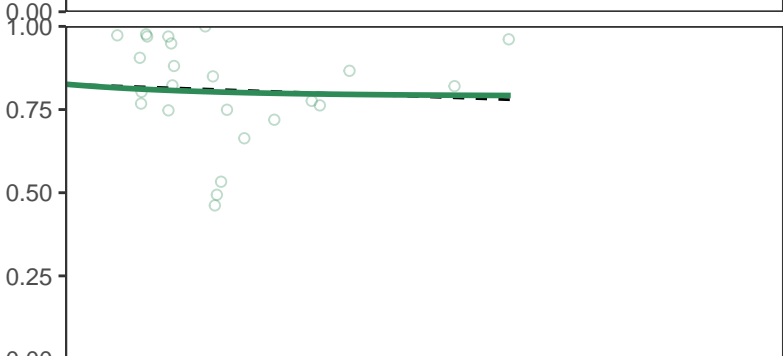

PaKiT01

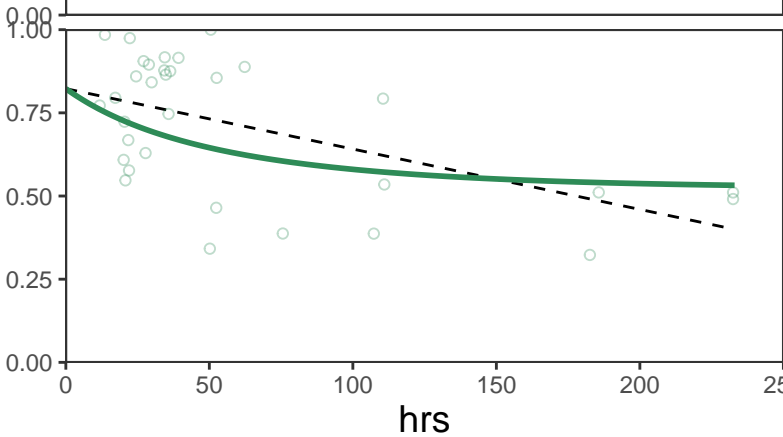

Supplement: supp [file elife-48401-supp-v1.zip › elife_poa_e48401_Figure_1_figure_supplement_7.pdf]

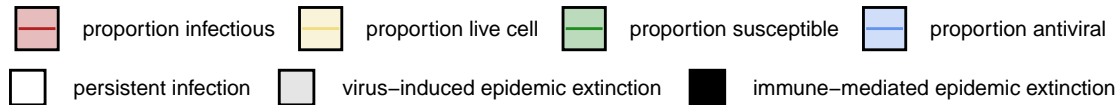

# A. Absent Immunity

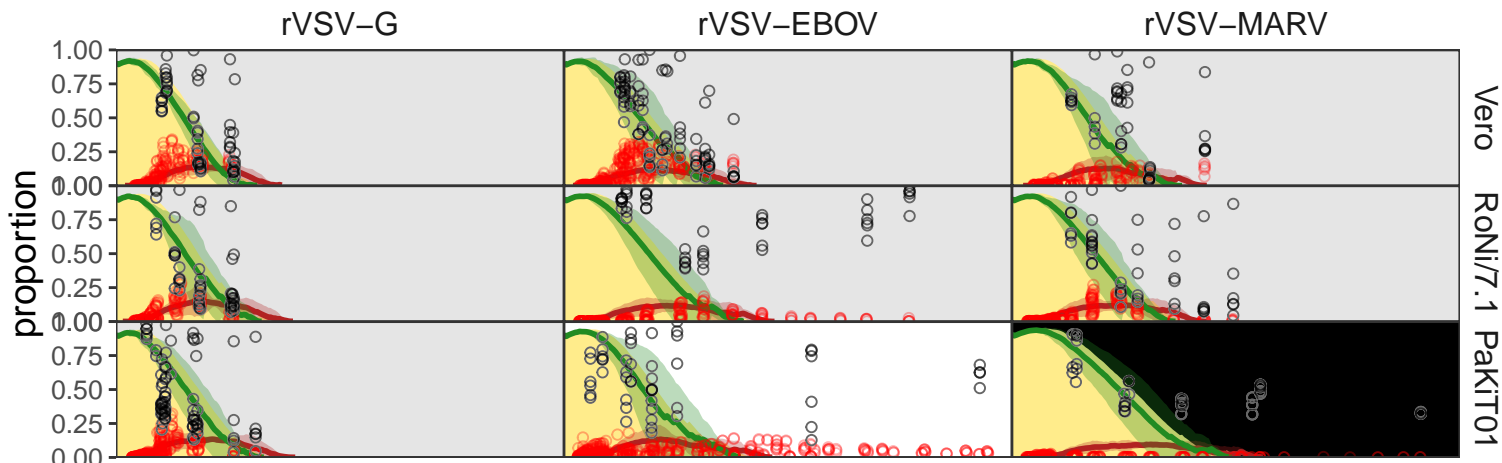

# B. Induced Immunity

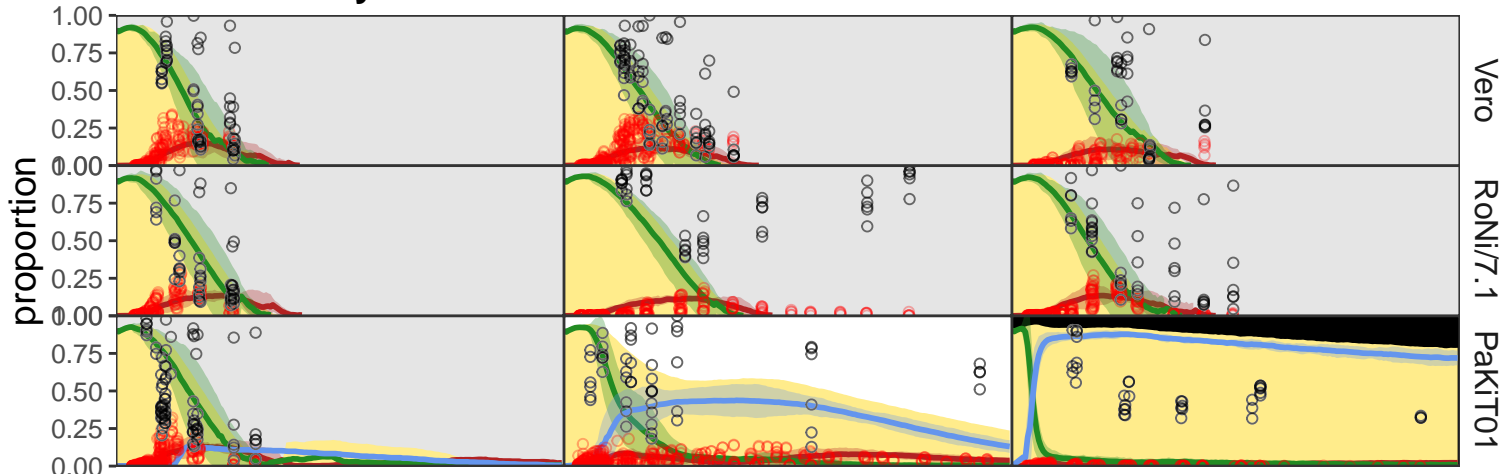

# C. Constitutive Immunity

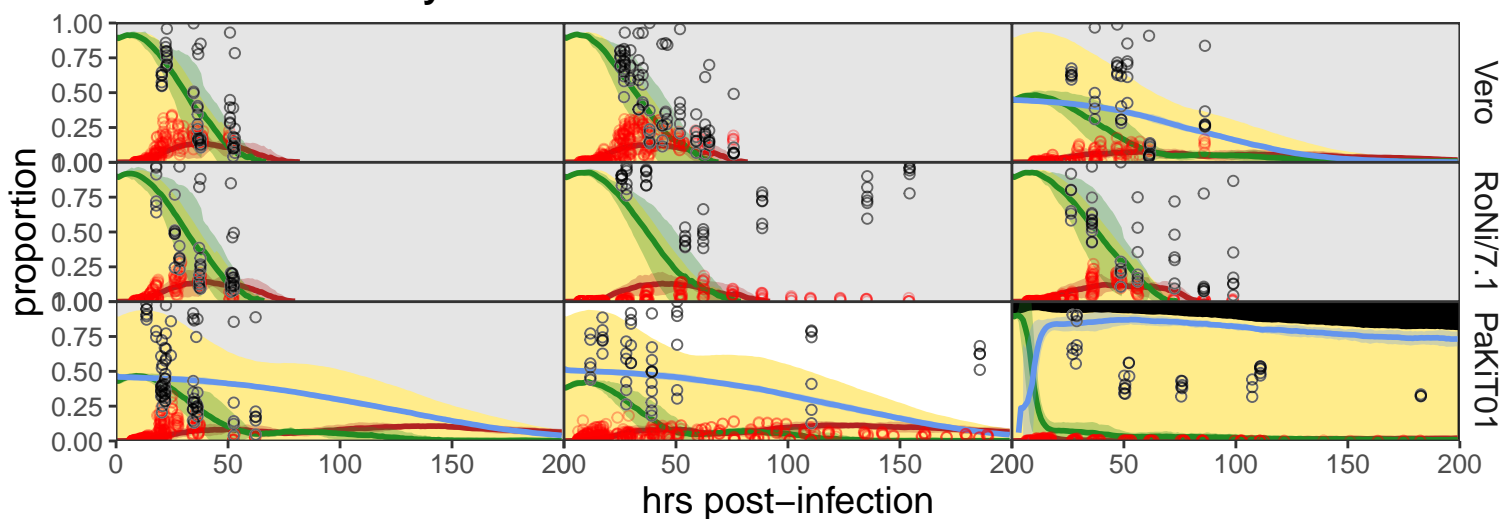

Supplement: supp [file elife-48401-supp-v1.zip › elife_poa_e48401_Figure_5_figure_supplement_3.pdf]

## A. Absent Immunity

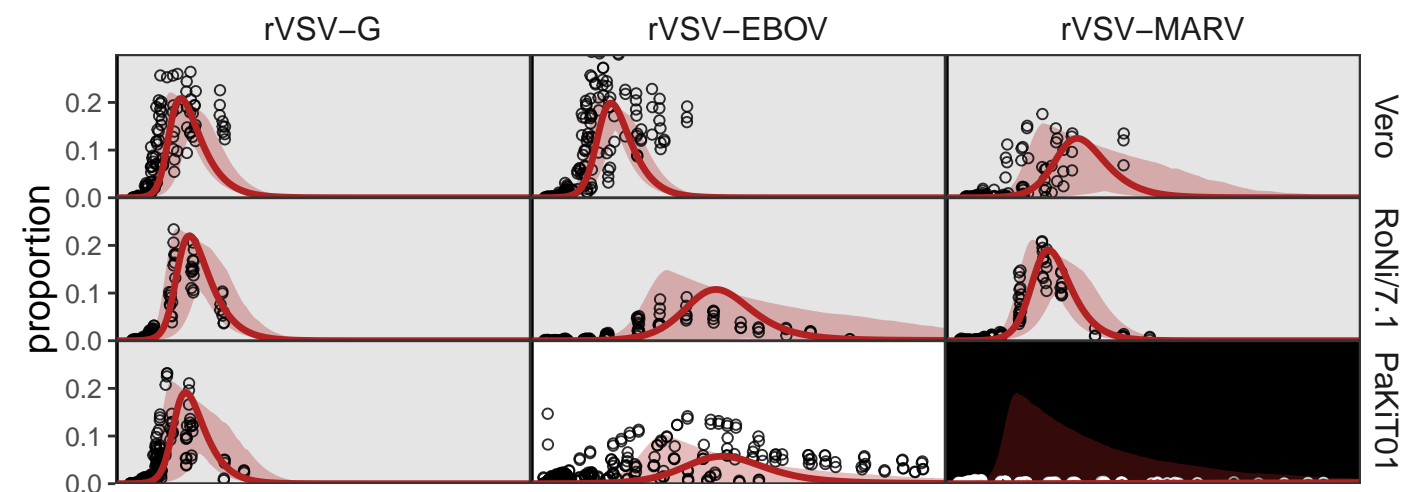

## B. Induced Immunity

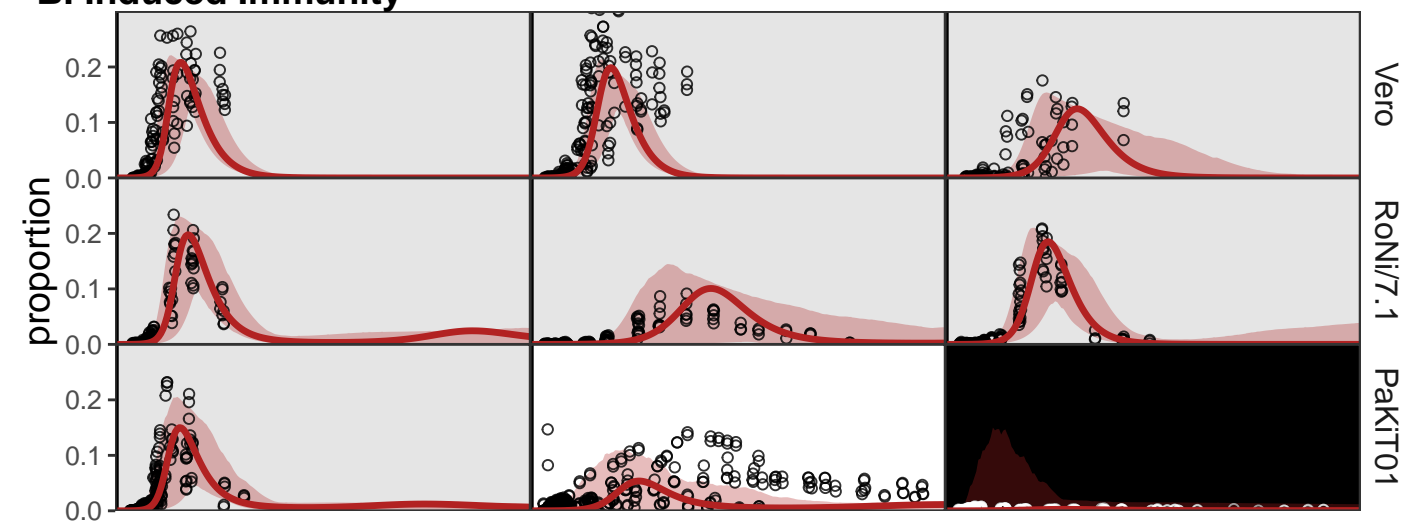

## C. Constitutive Immunity

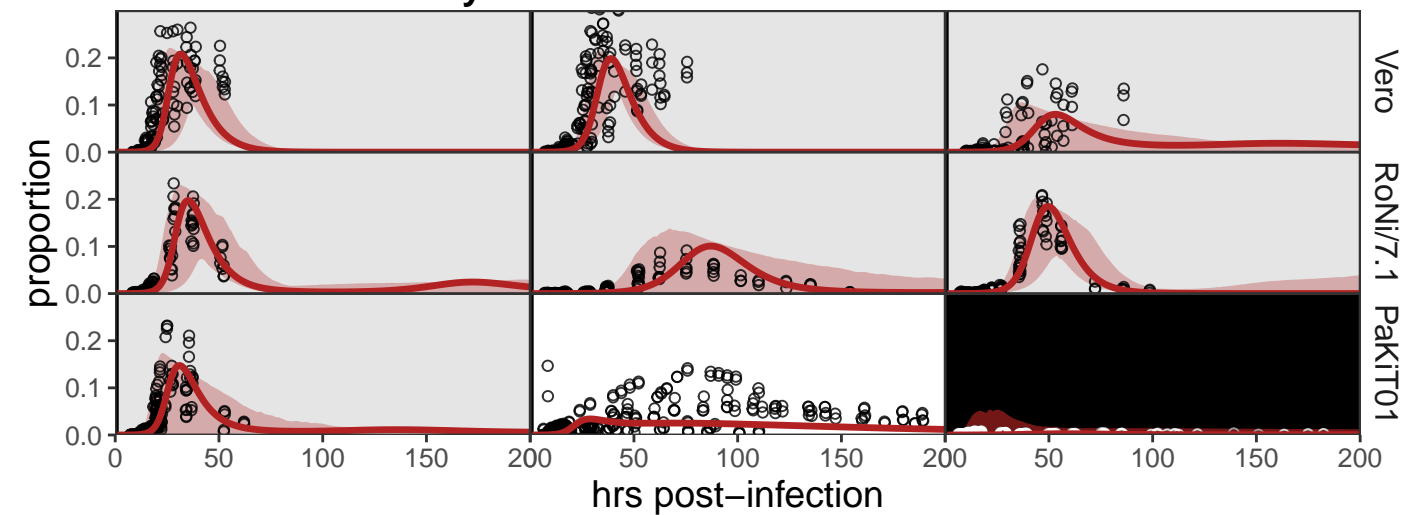

Supplement: supp [file elife-48401-supp-v1.zip › elife_poa_e48401_Figure_1_figure_supplement_5.pdf]
